# Supplementary material for: Antarctic Ice Sheet paleo-constraint database
Source: Copernicus journal article supplement (doi:10.5194/essd-15-3573-2023), 2023-08-10

Marine core ages and interpretations at site: 2101  
(Mackintosh et al., 2014; Gingele et al., 1997)

Legend

• OMC

Depth (cm)

47.5  
45.0  
42.5  
40.0  
37.5  
35.0  
32.5  
30.0  
27.5

10.5 11.0 11.5 12.0 12.5 13.0

Calibrated age (kyr before present)

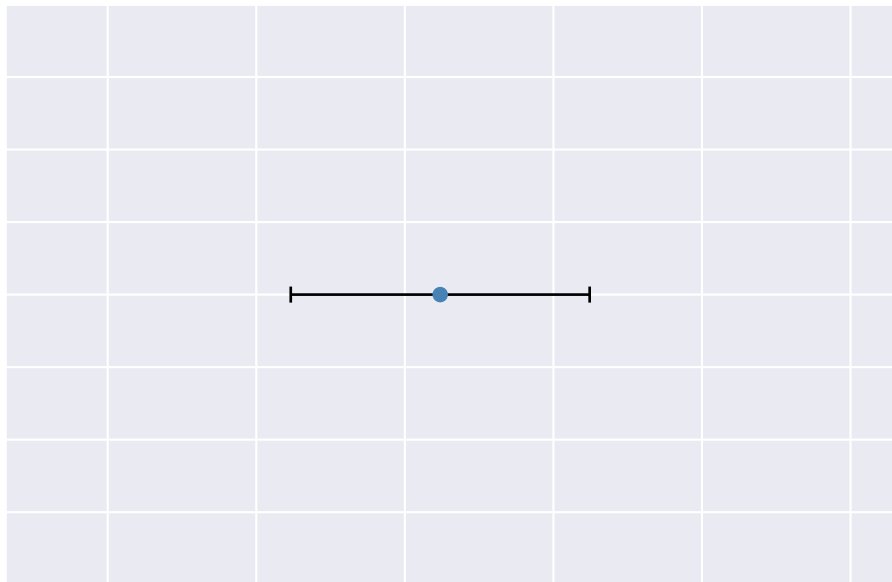

Marine core ages and interpretations at site: 2201  
(Mackintosh et al., 2014; Leventer et al., 2006)

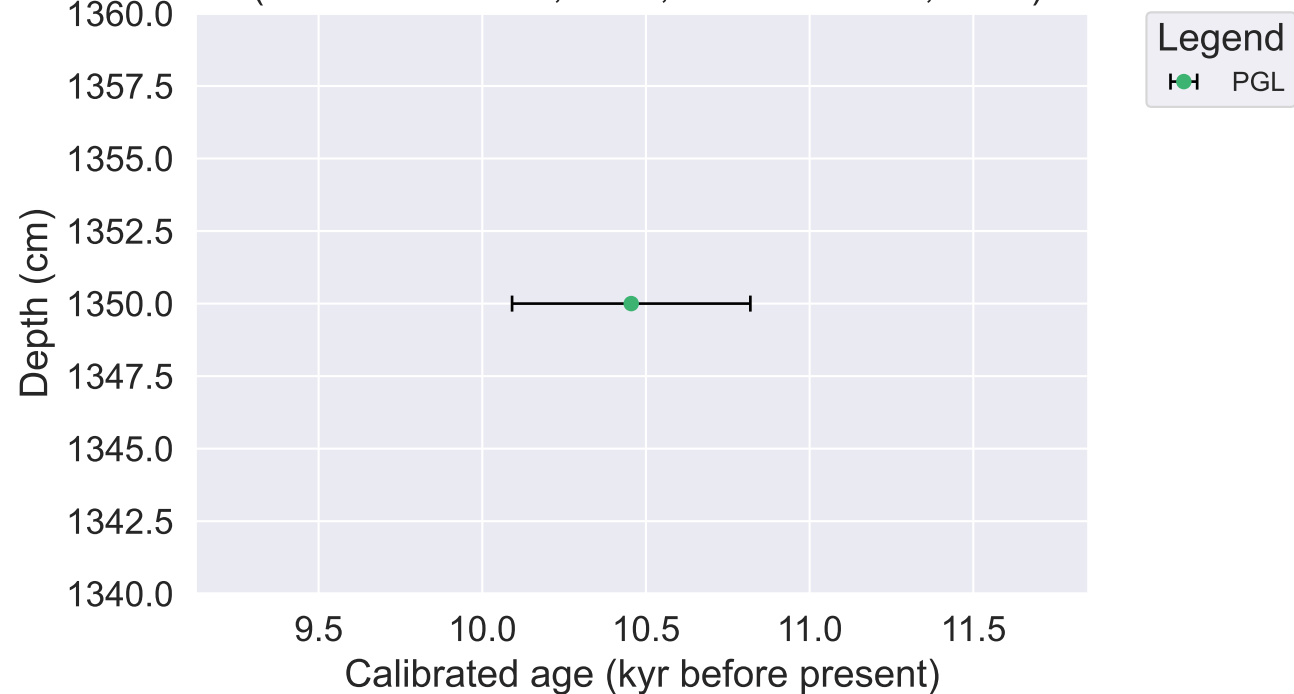

Marine core ages and interpretations at site: 2301  
(Mackintosh et al., 2014; McMullen et al., 2006)

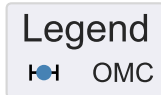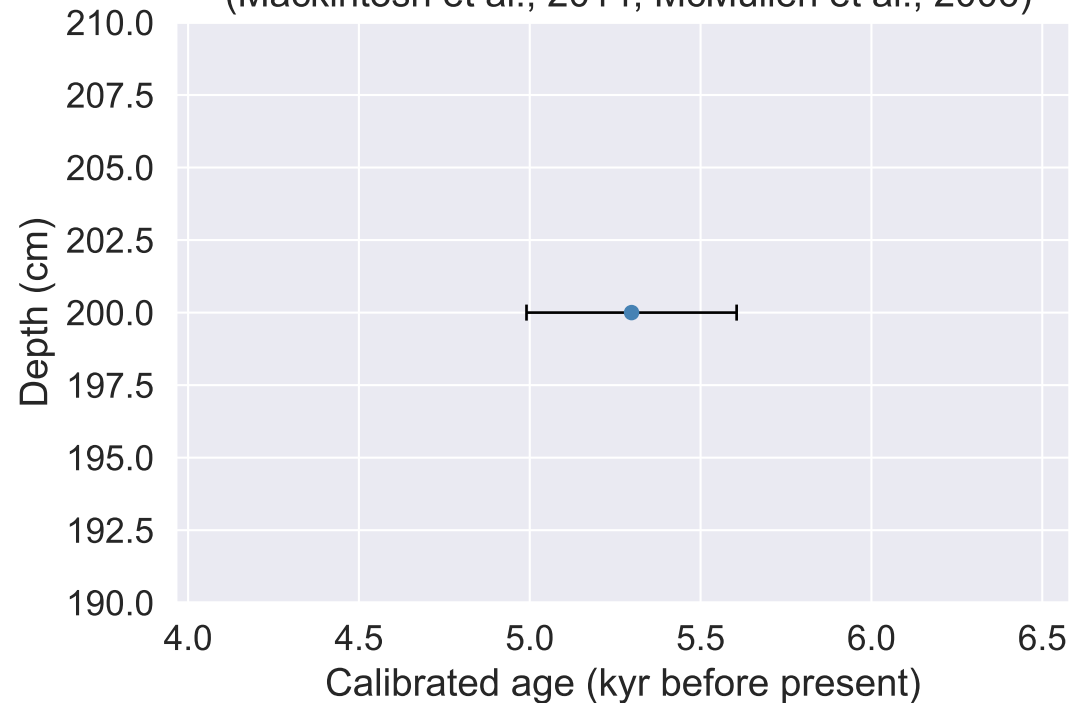

# Marine core ages and interpretations at site: 2401 (Licht et al., 1996; Anderson et al., 2014)

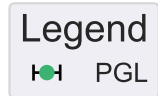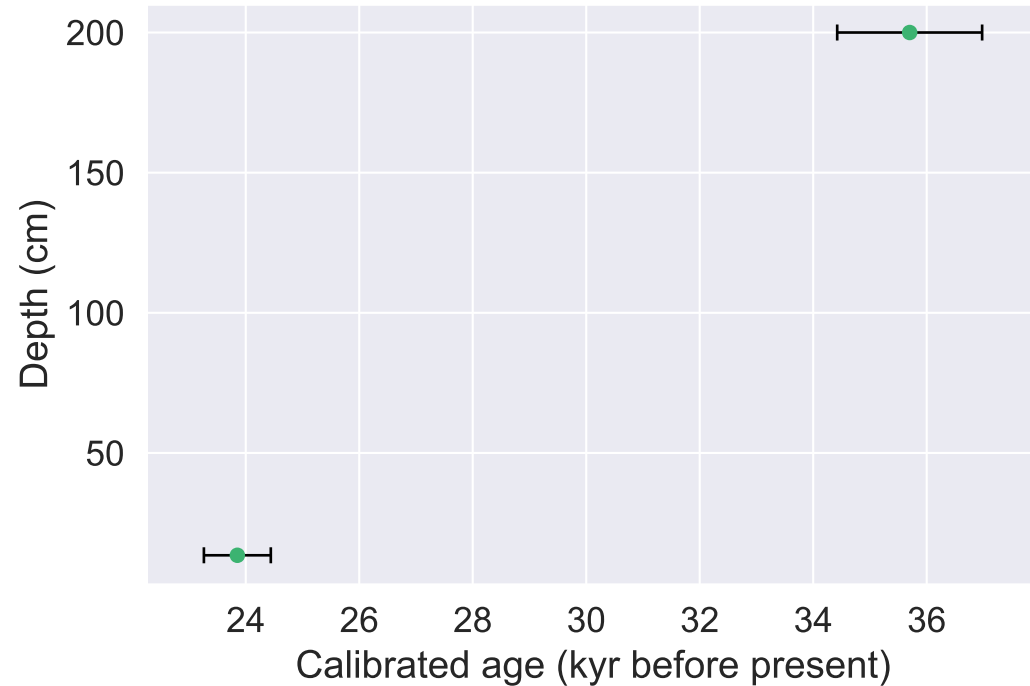

Marine core ages and interpretations at site: 2402  
(Licht et al., 1996; Anderson et al., 2014)

Legend  
● OMC

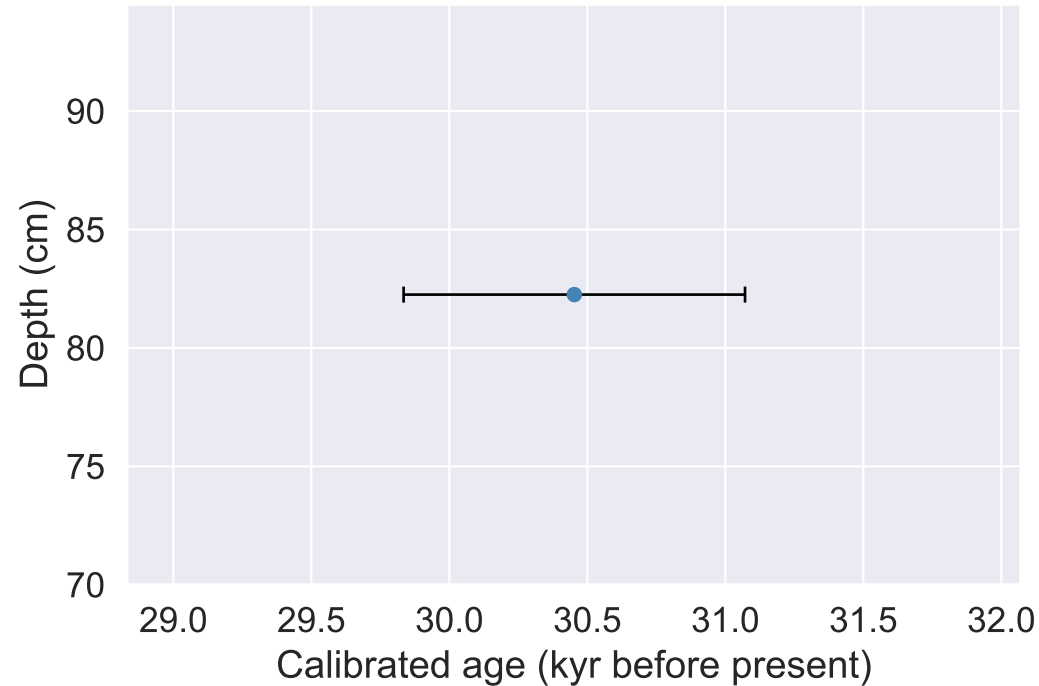

# Marine core ages and interpretations at site: 2403 (Licht et al., 1996; Anderson et al., 2014)

Legend  
PGL

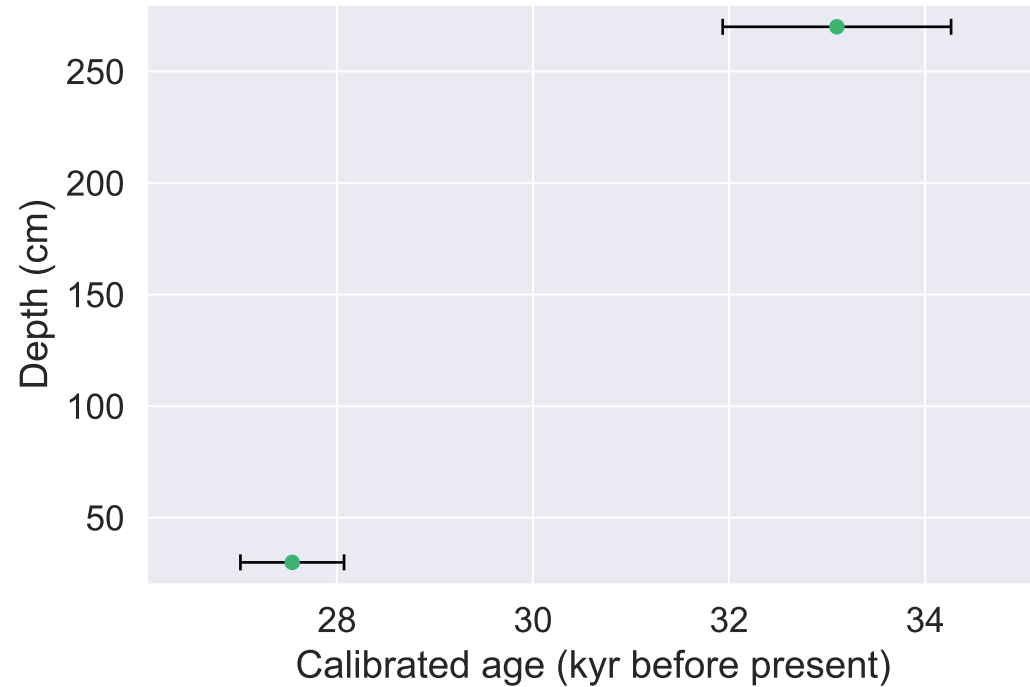

Marine core ages and interpretations at site: 2404  
(Domack et al., 1999; Anderson et al., 2014)

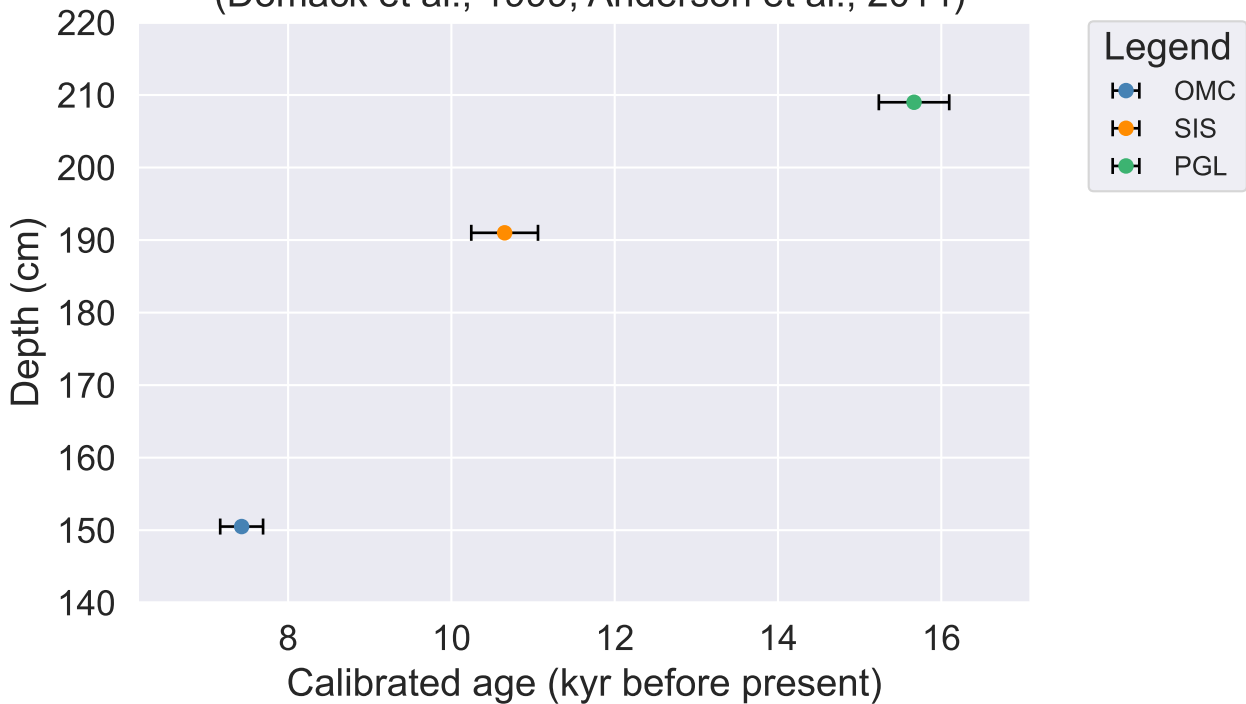

Marine core ages and interpretations at site: 2405  
(Domack et al., 1999; Anderson et al., 2014)

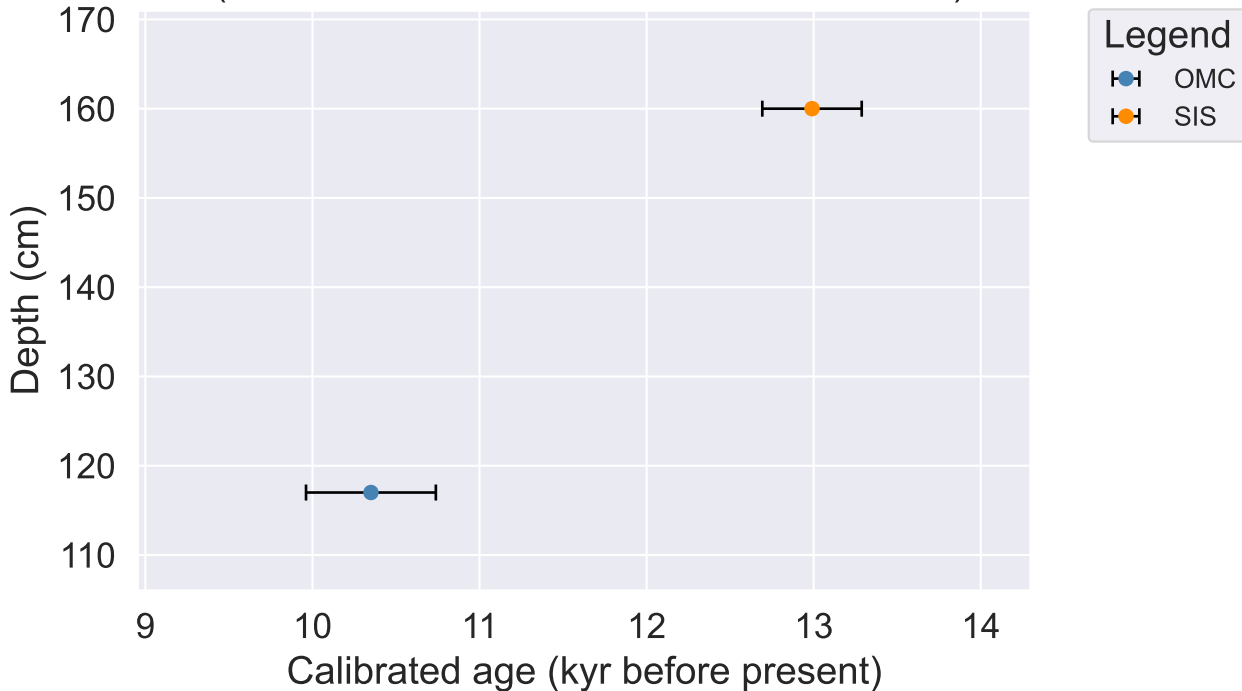



Marine core ages and interpretations at site: 2406  
(Licht et al., 1996; Anderson et al., 2014)

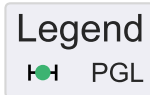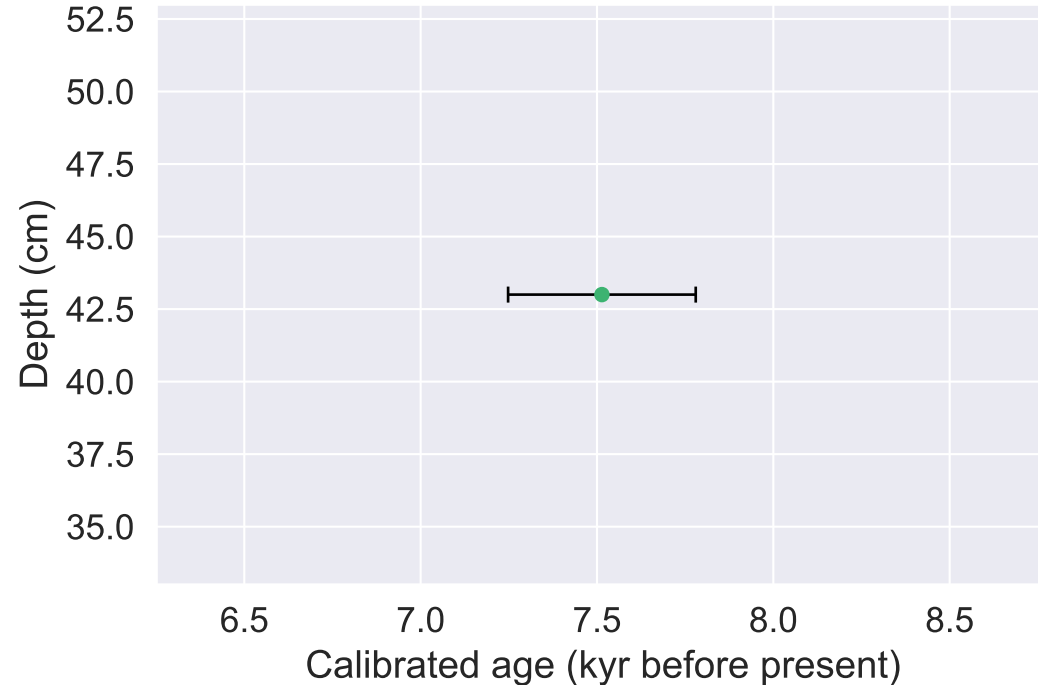

# Marine core ages and interpretations at site: 2407 (Bart et al., 2018)

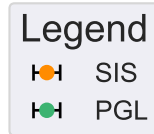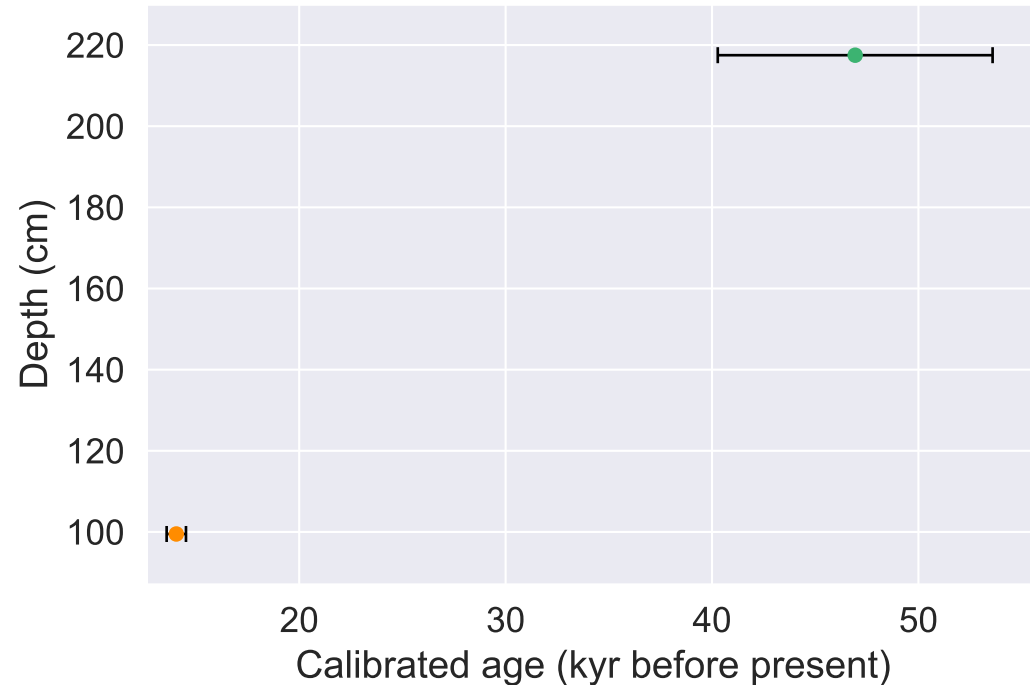

# Marine core ages and interpretations at site: 2408 (Bart et al., 2018)

Legend  
SIS

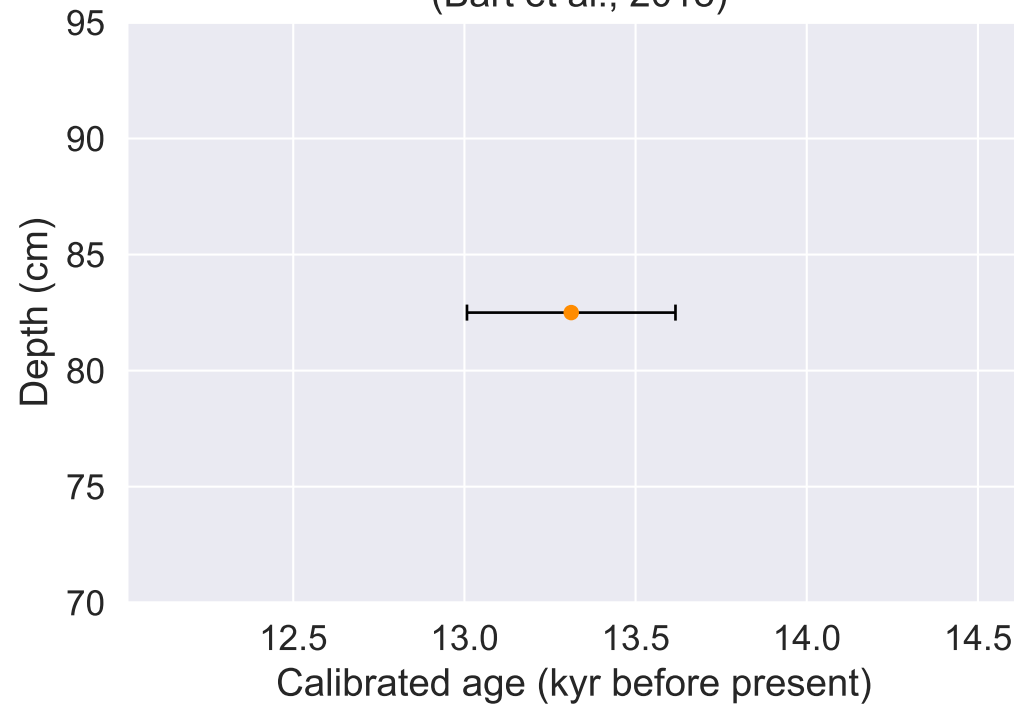

# Marine core ages and interpretations at site: 2409 (Bart et al., 2018)

Legend  
H SIS

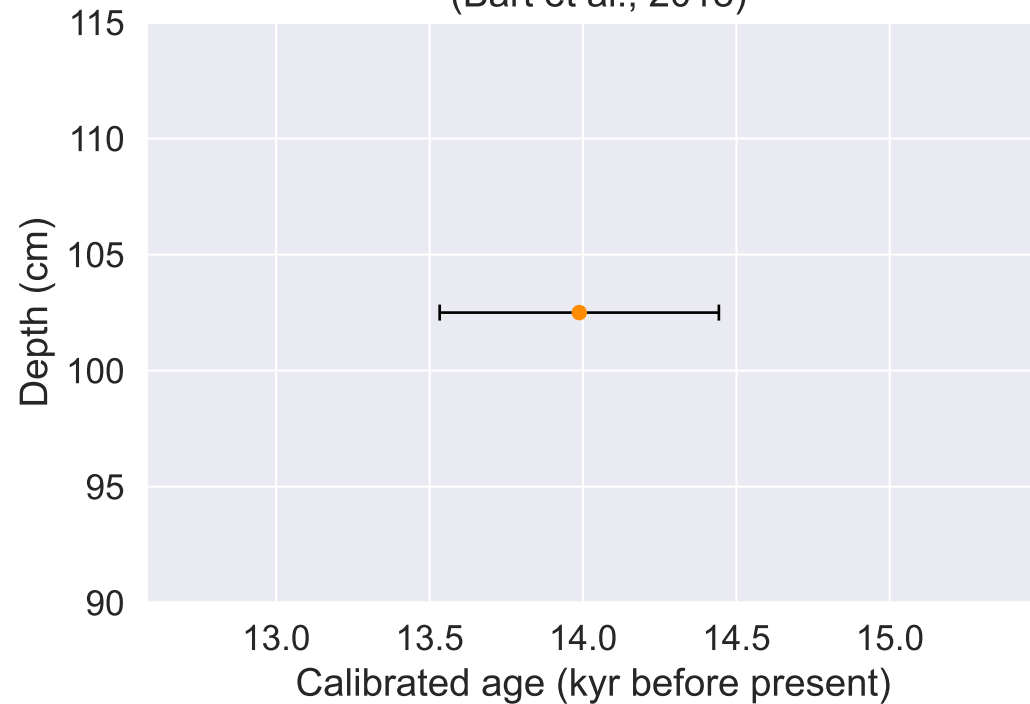

# Marine core ages and interpretations at site: 2410 (Bart et al., 2018)

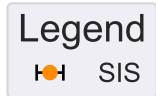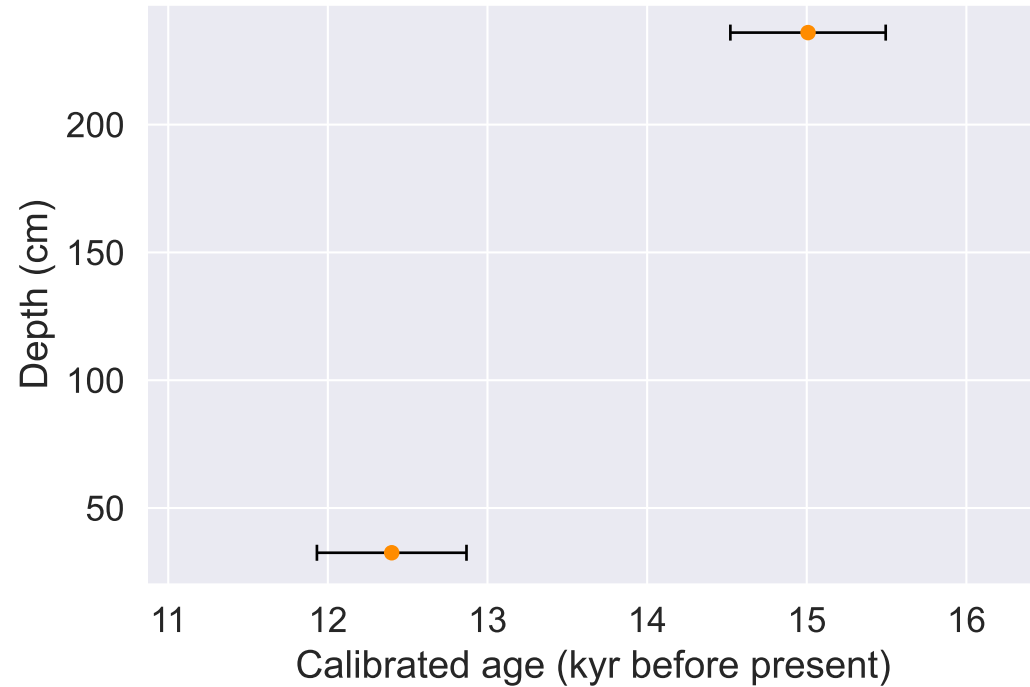

# Marine core ages and interpretations at site: 2411 (Bart et al., 2018)

Legend  
● SIS

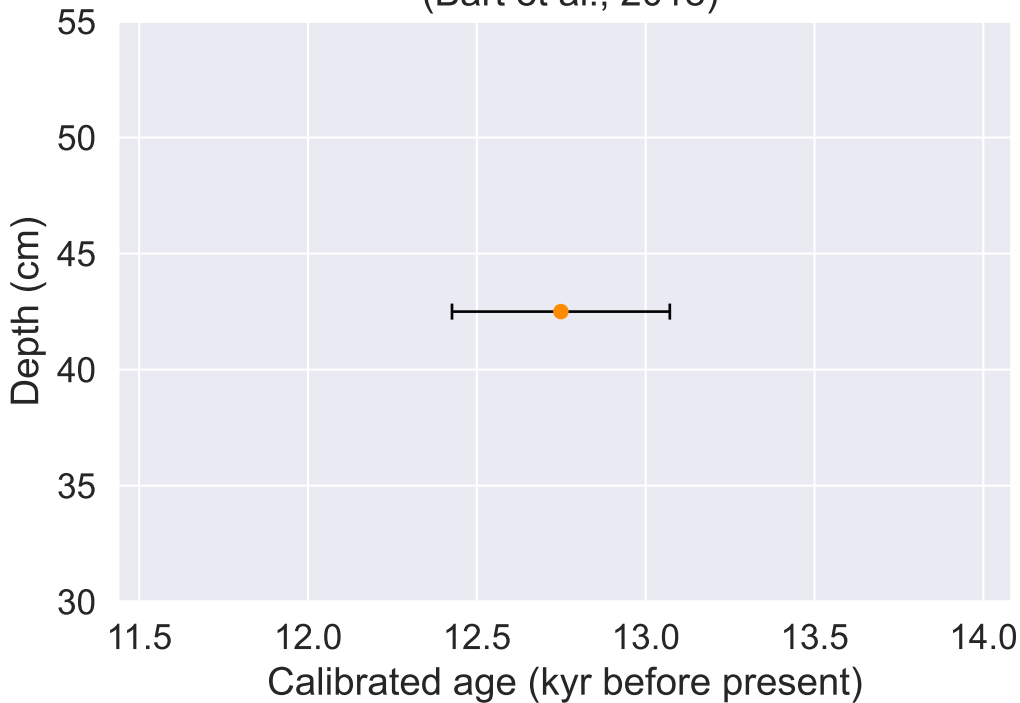

# Marine core ages and interpretations at site: 2412 (Bart et al., 2018)

Legend  
H PGL

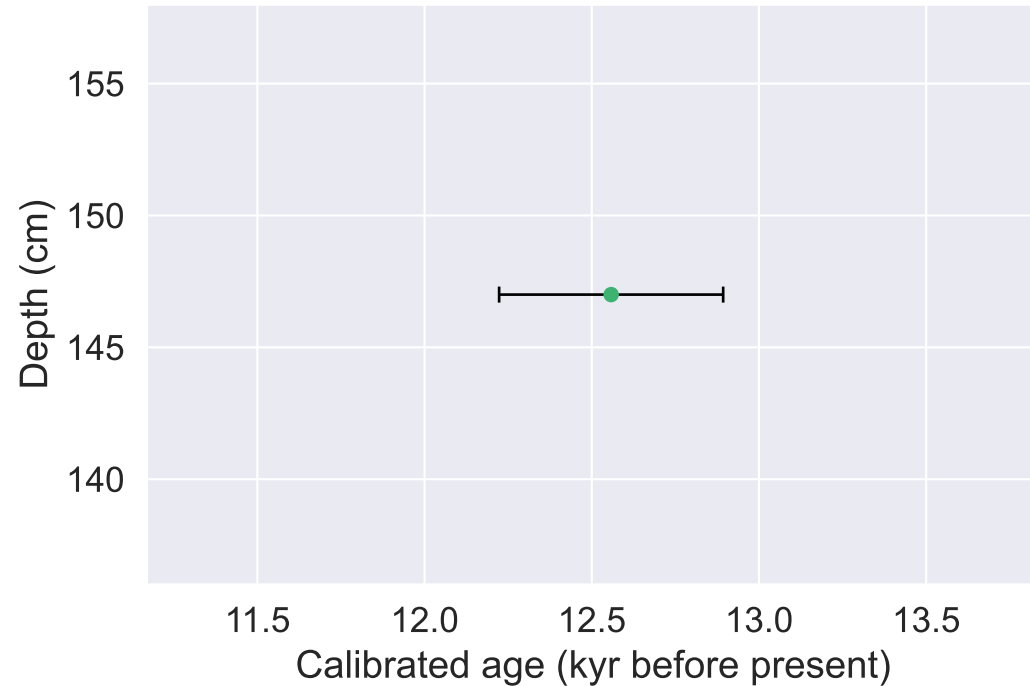

# Marine core ages and interpretations at site: 2413 (Bart et al., 2018)

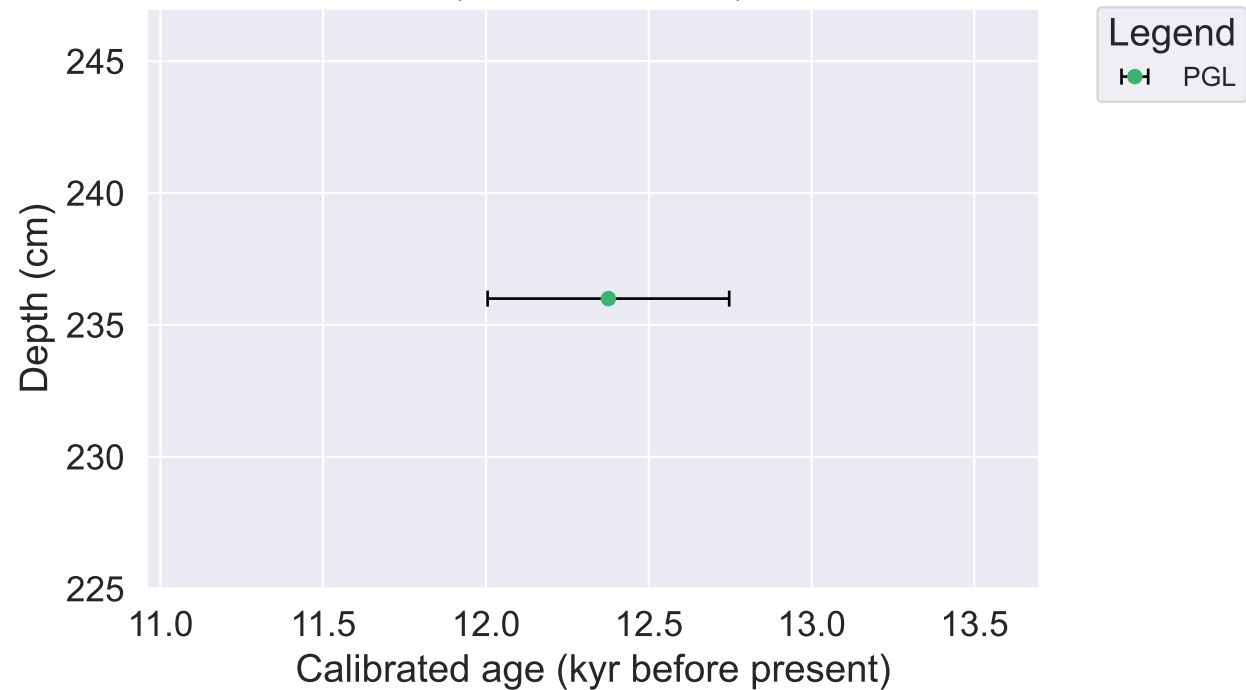



# Marine core ages and interpretations at site: 2414 (Bart et al., 2018)

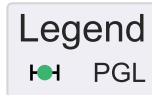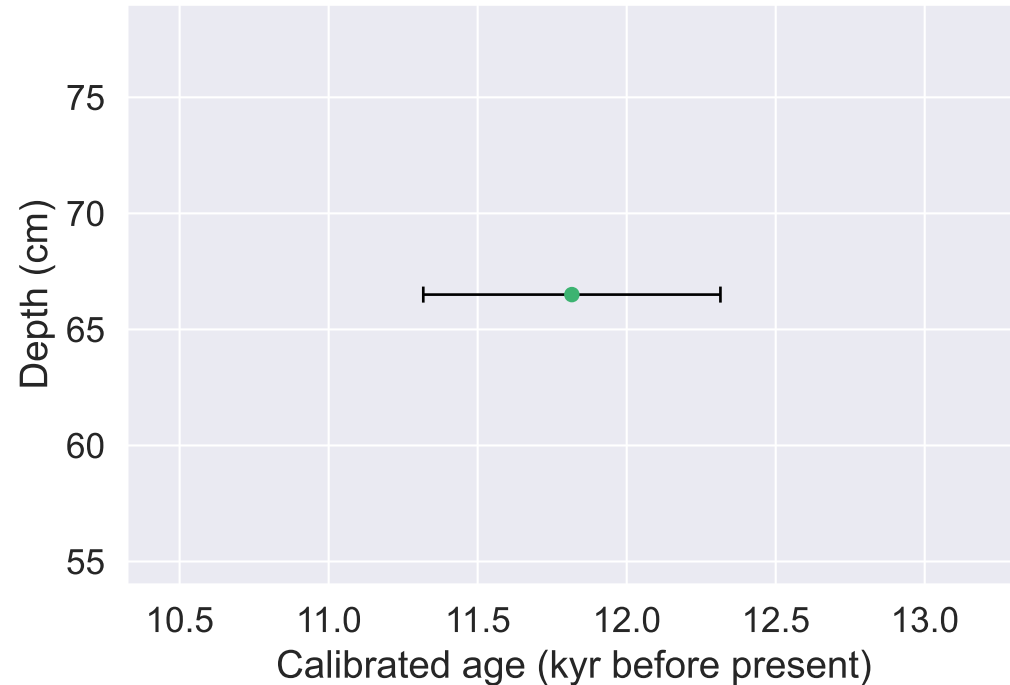

# Marine core ages and interpretations at site: 2415 (Bart et al., 2018)

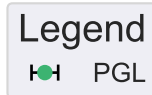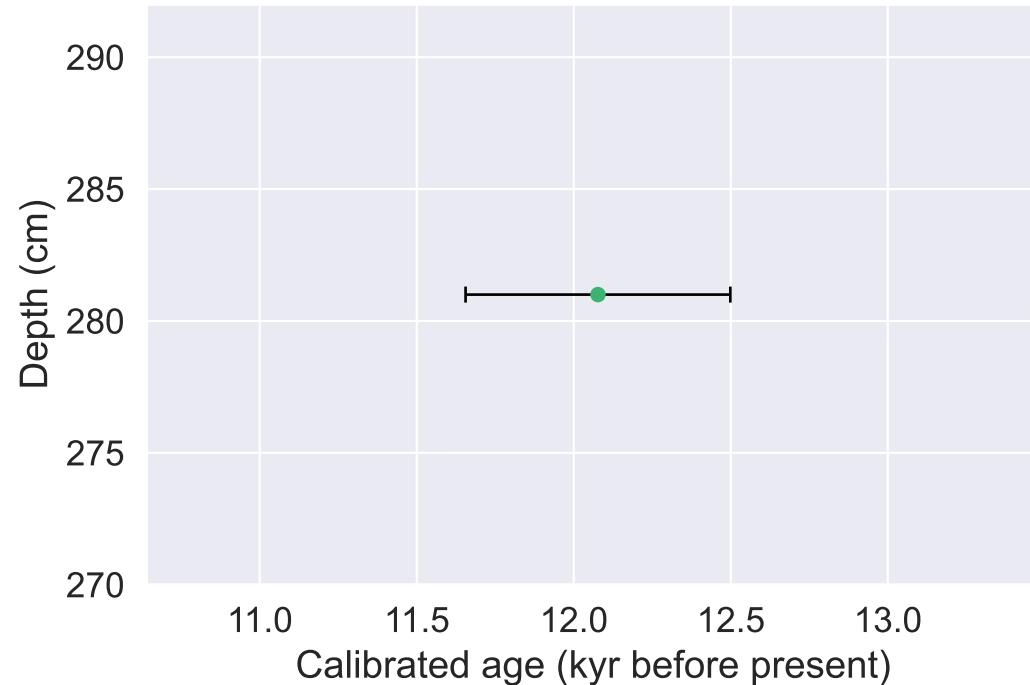

# Marine core ages and interpretations at site: 2416 (Bart et al., 2018)

Legend  
● SIS

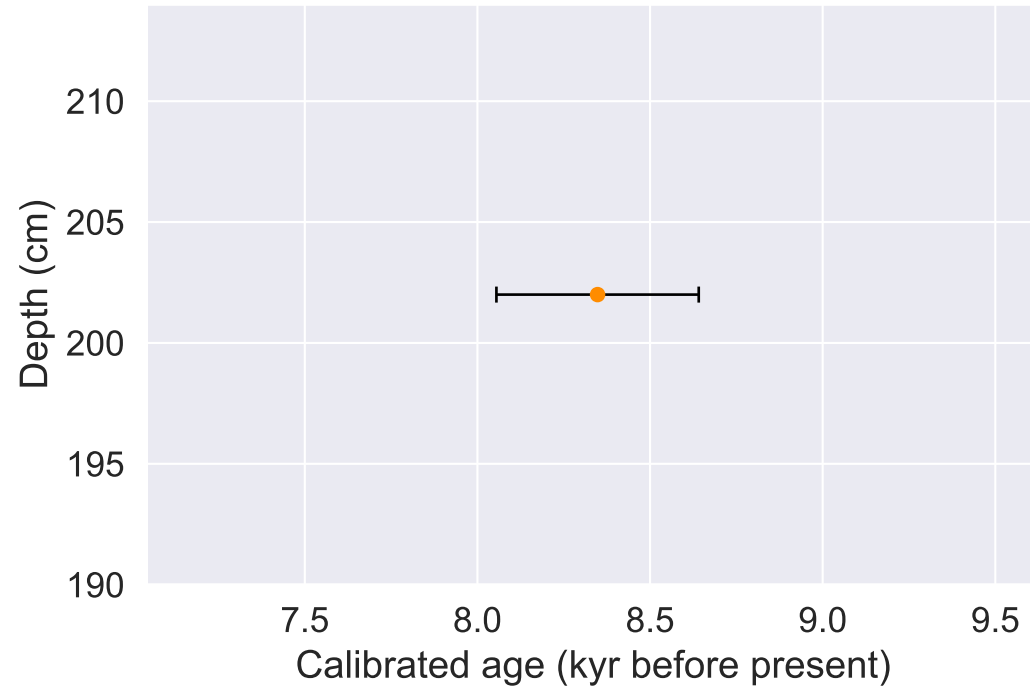

Marine core ages and interpretations at site: 2501  
(Larter et al., 2014; Hillenbrand et al., 2013; Klages et al., 2014)

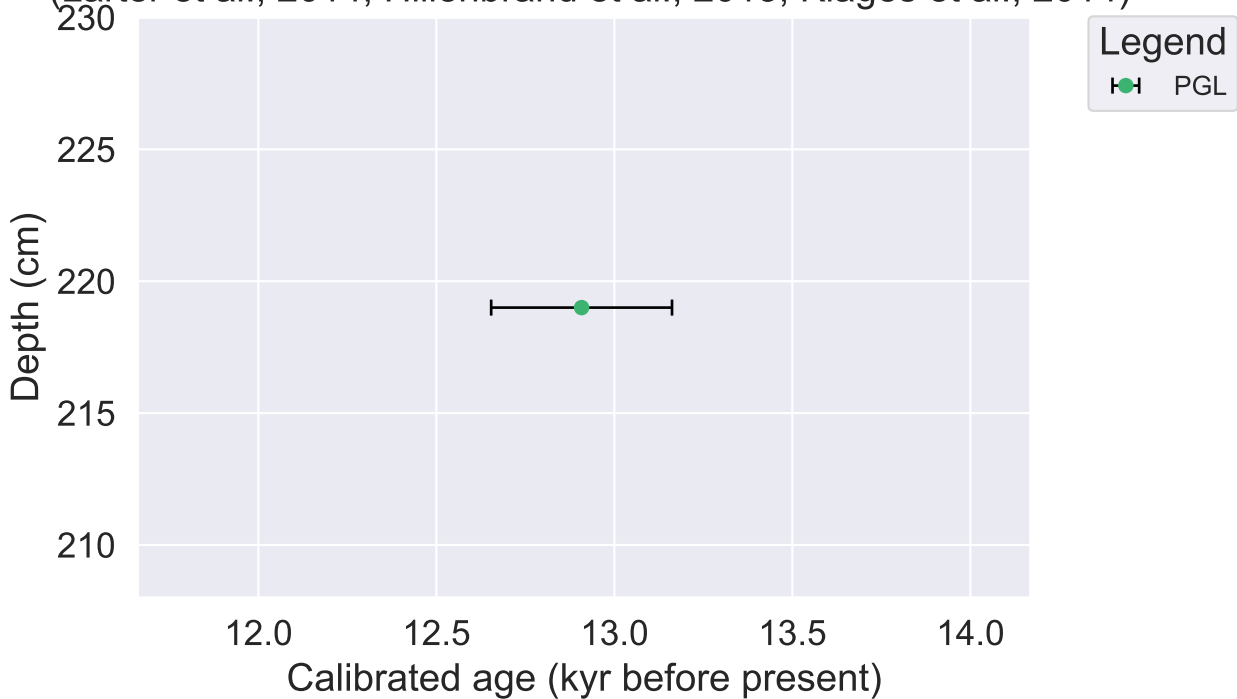

# Marine core ages and interpretations at site: 2502 (Larter et al., 2014; Anderson et al., 2002)

Legend  
● OMC

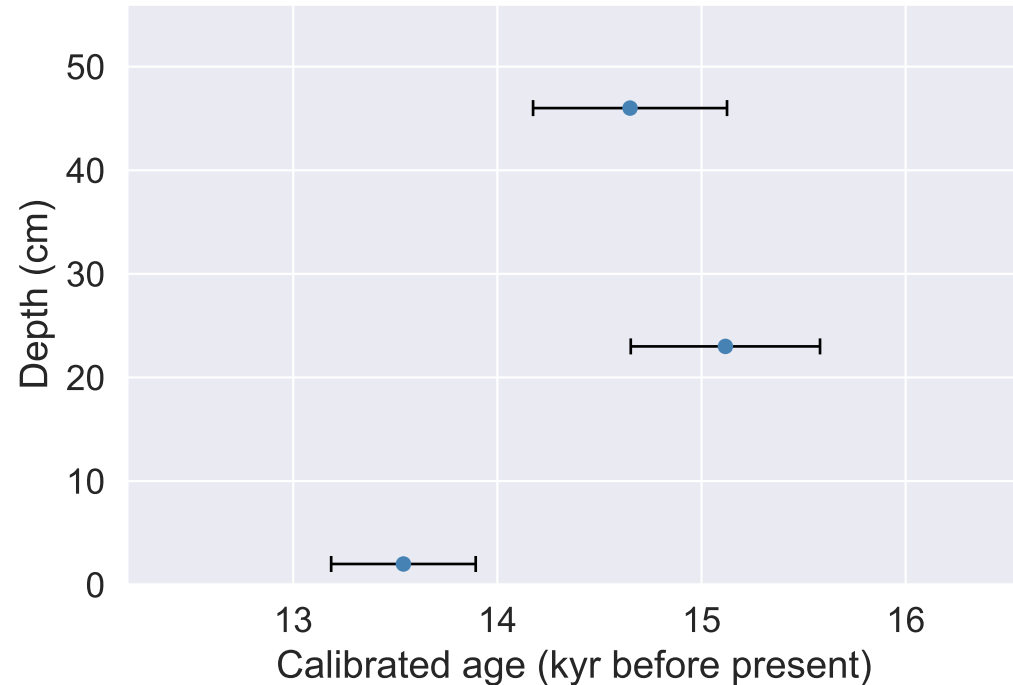

# Marine core ages and interpretations at site: 2503 (Larter et al., 2014; Anderson et al., 2002)

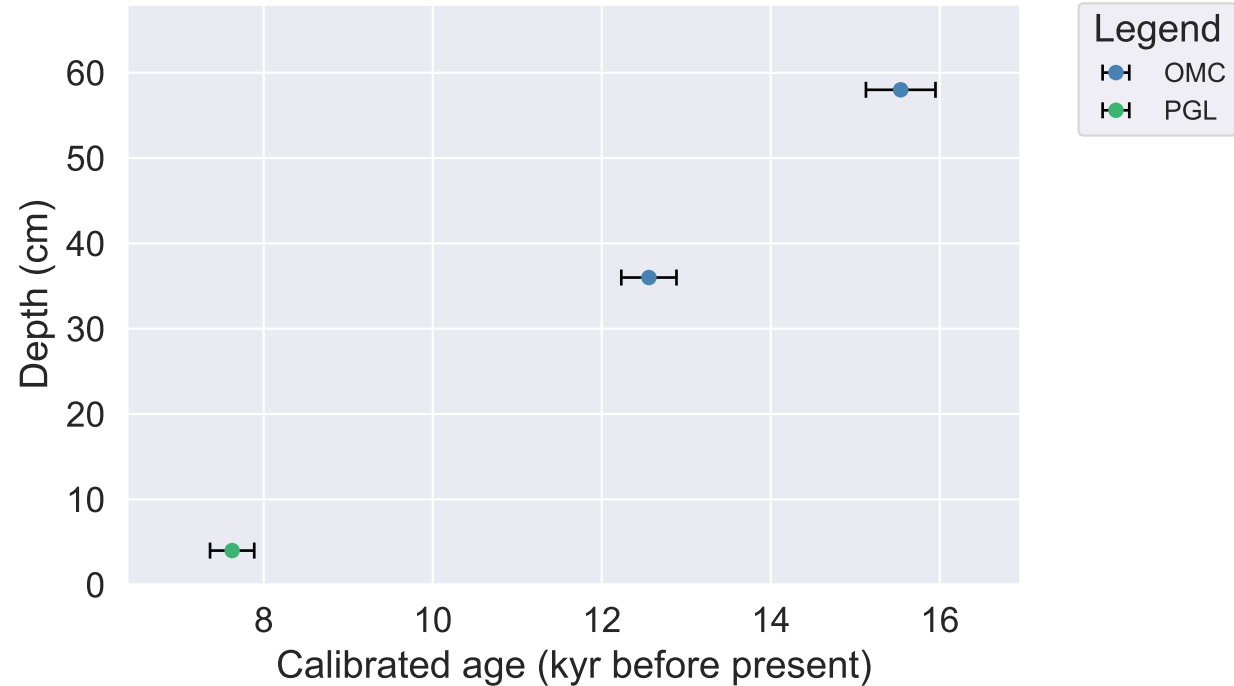

# Marine core ages and interpretations at site: 2504 (Larter et al., 2014; Smith et al., 2011)

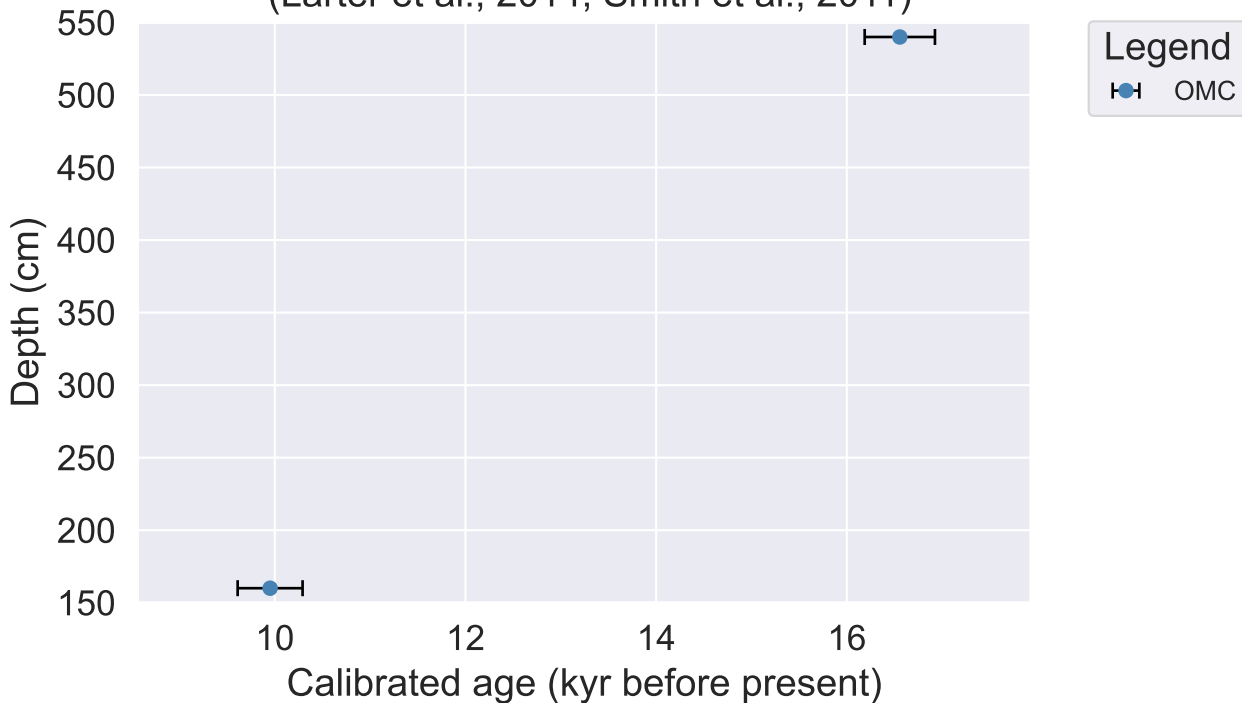

# Marine core ages and interpretations at site: 2505 (Larter et al., 2014; Smith et al., 2011)

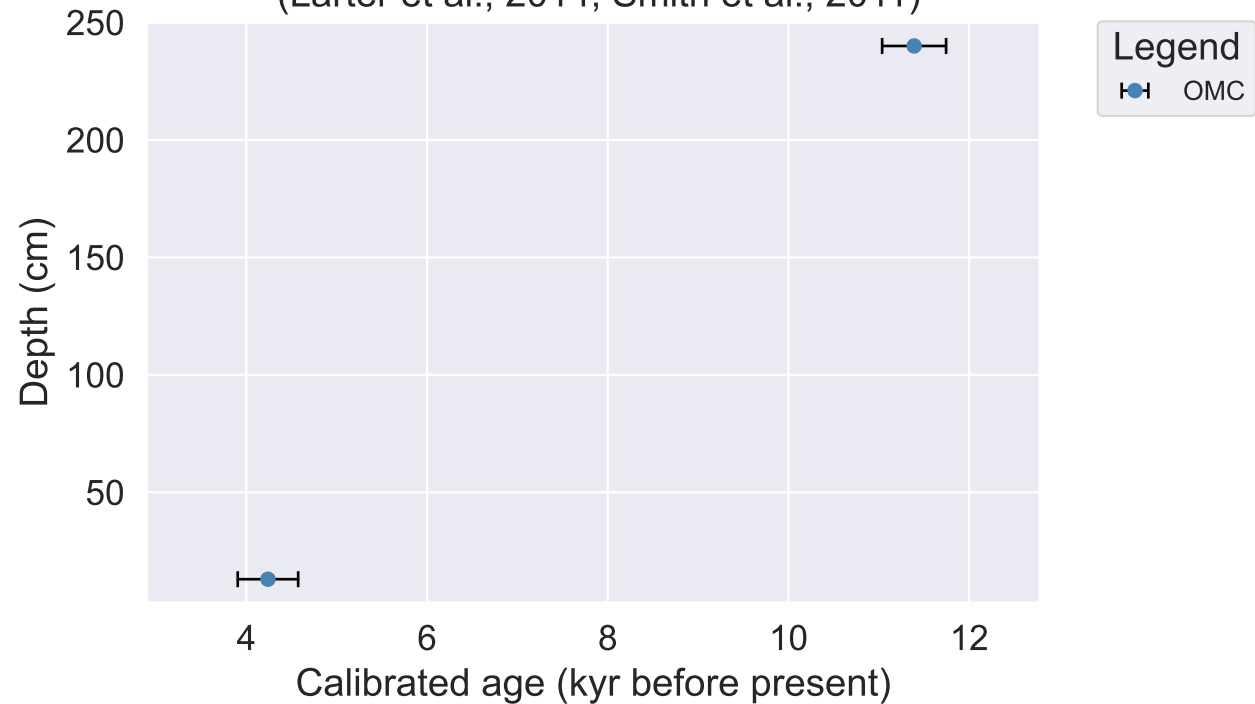



# Marine core ages and interpretations at site: 2506 (Larter et al., 2014)

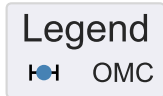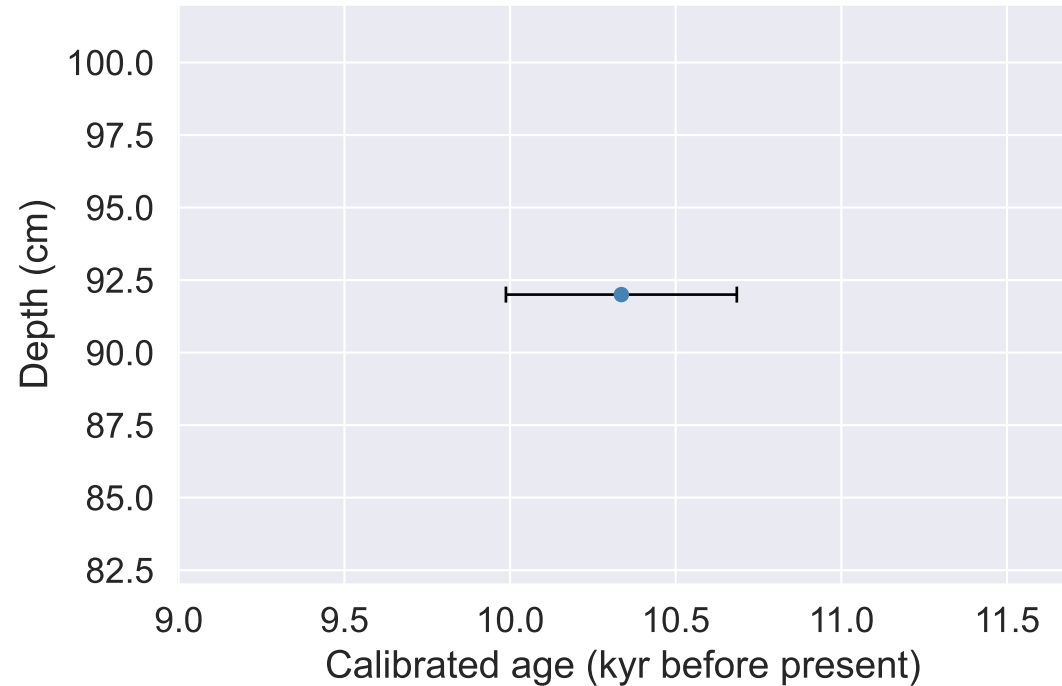

# Marine core ages and interpretations at site: 2507 (Larter et al., 2014; Smith et al., 2011)

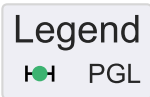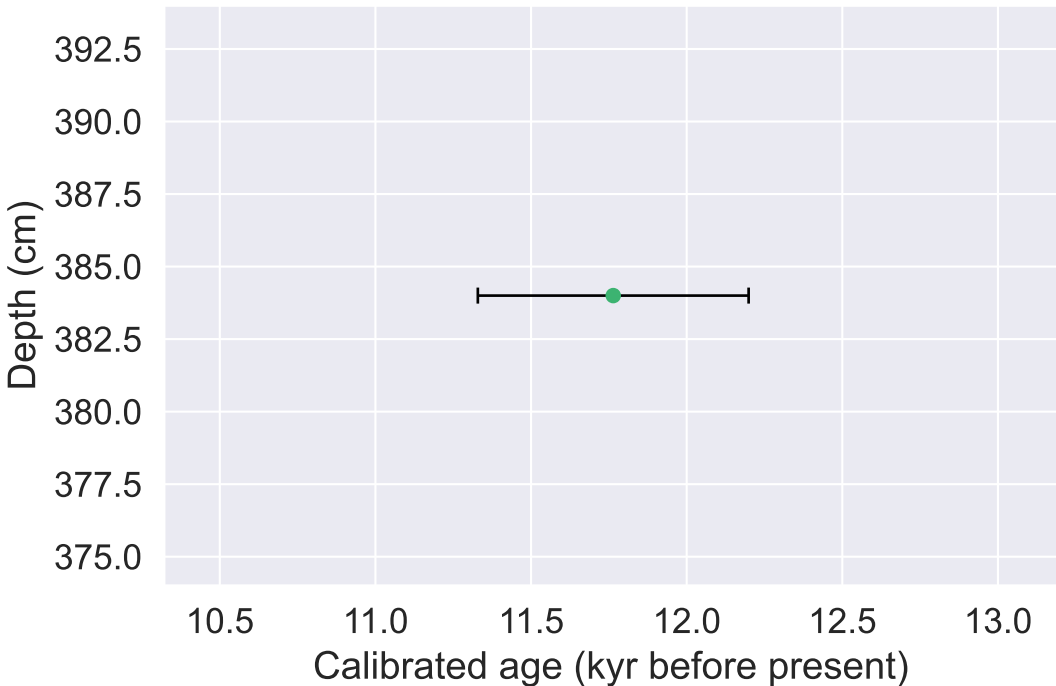

Marine core ages and interpretations at site: 2508  
(Larter et al., 2014; Kirshner et al., 2012)

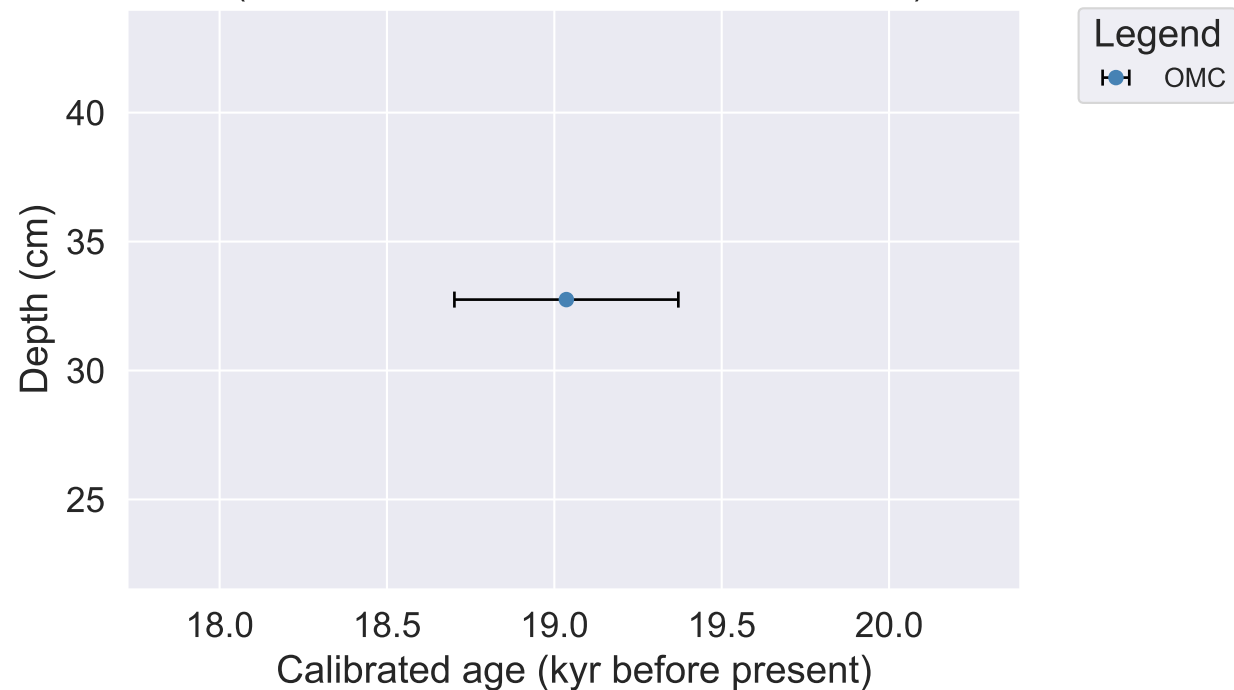

Marine core ages and interpretations at site: 2509  
(Larter et al., 2014; Kirshner et al., 2012)

Legend

● OMC

Depth (cm)

130

125

120

115

15.5

16.0

16.5

17.0

17.5

Calibrated age (kyr before present)

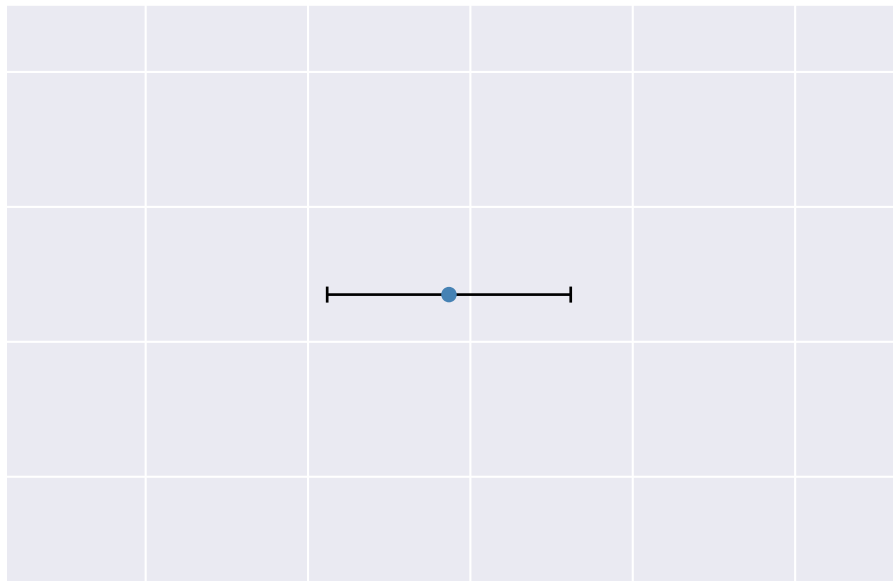

# Marine core ages and interpretations at site: 2510 (Larter et al., 2014; Kirshner et al., 2012)

Legend  
H PGL

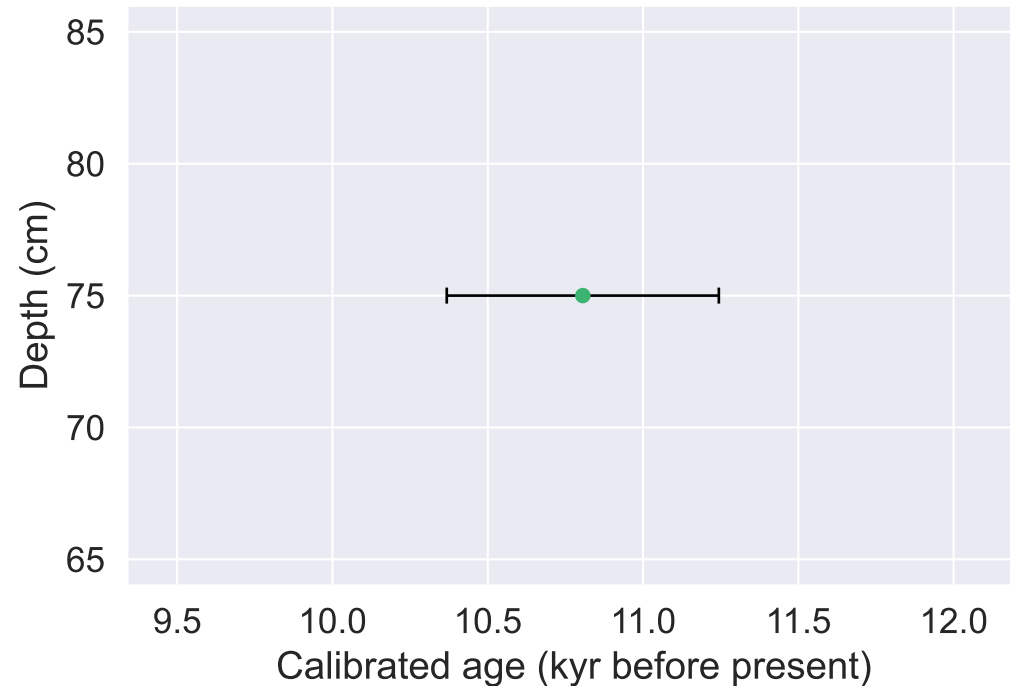

# Marine core ages and interpretations at site: 2511 (Larter et al., 2014; Kirshner et al., 2012)

Legend  
H PGL

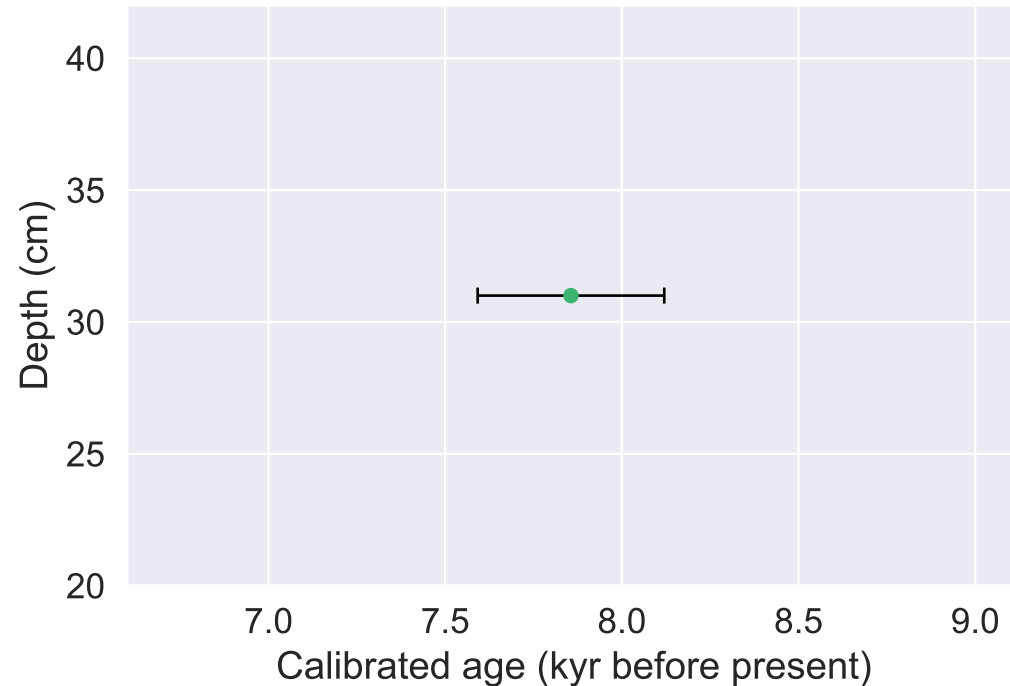

# Marine core ages and interpretations at site: 2512 (Larter et al., 2014; Kirshner et al., 2012)

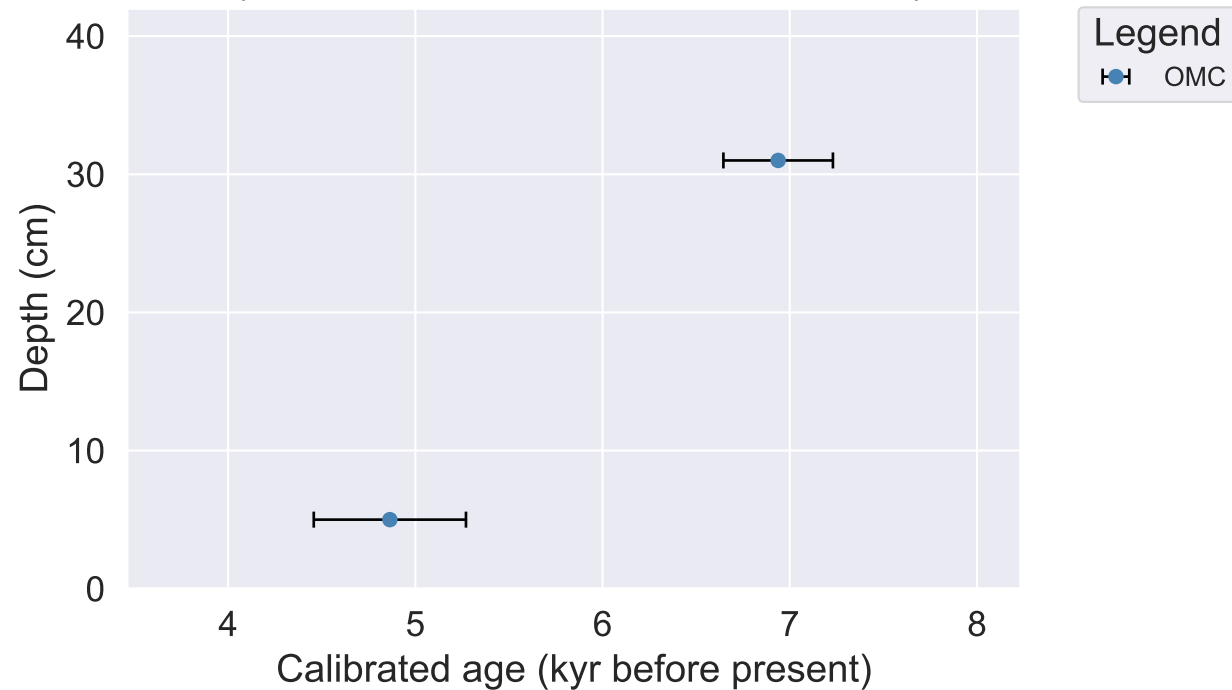

# Marine core ages and interpretations at site: 2513 (Larter et al., 2014; Kirshner et al., 2012)

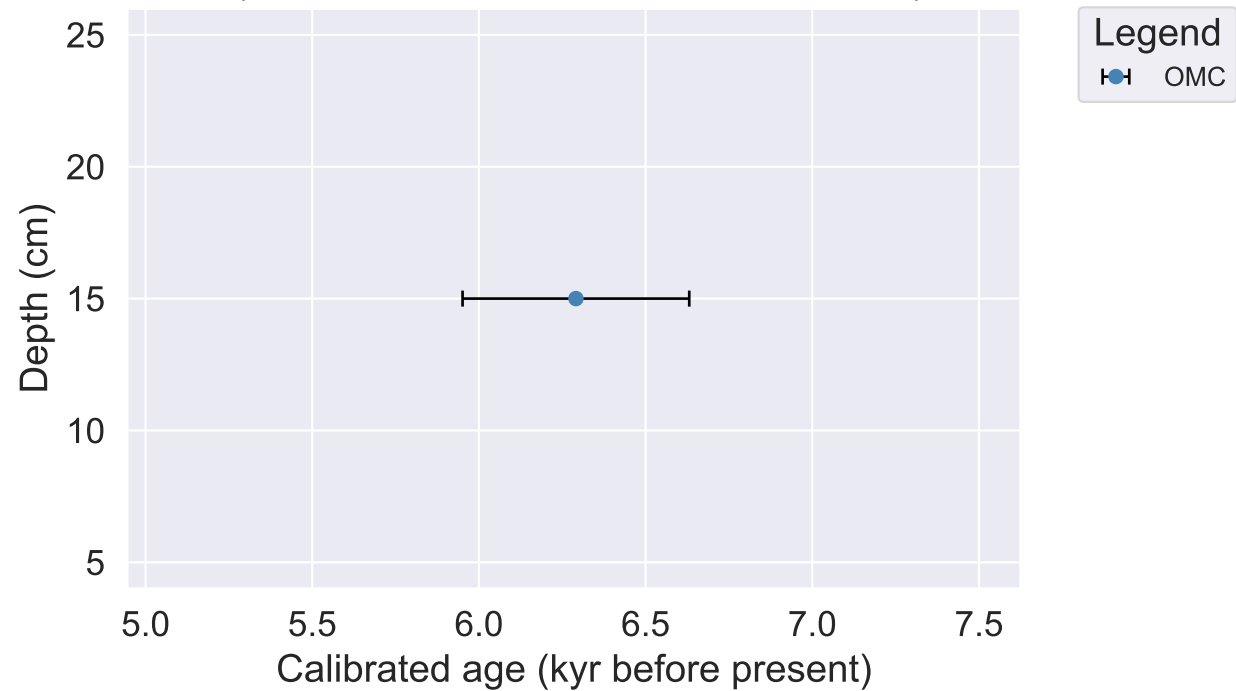



Marine core ages and interpretations at site: 2514  
(Larter et al., 2014; Jakobsson et al., 2011)

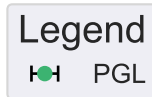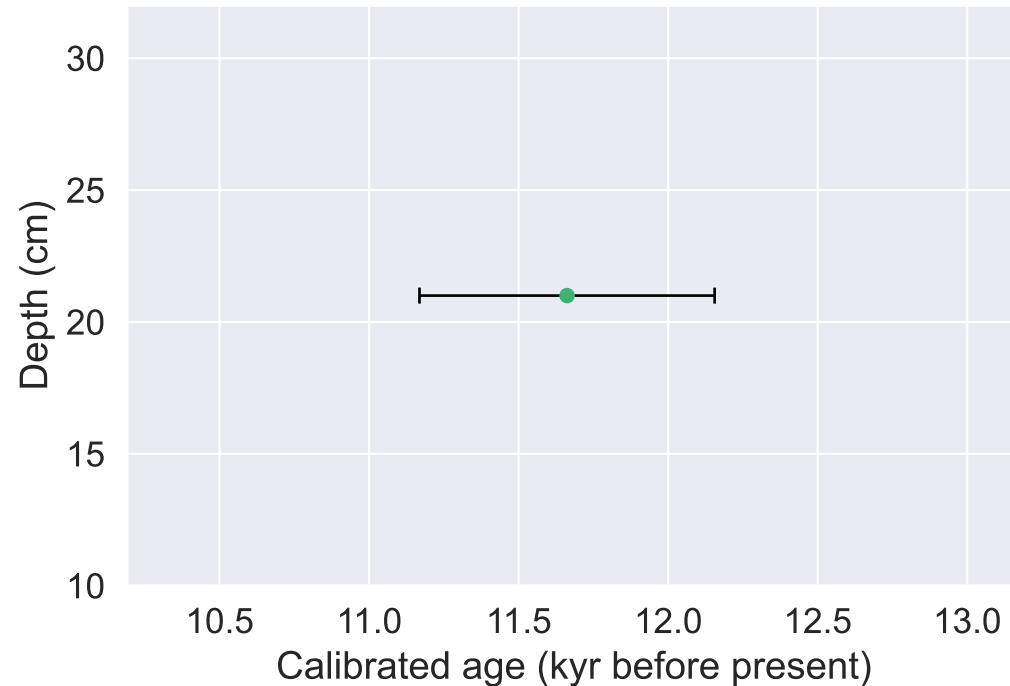

# Marine core ages and interpretations at site: 2515 (Larter et al., 2014; Lowe et al., 2002)

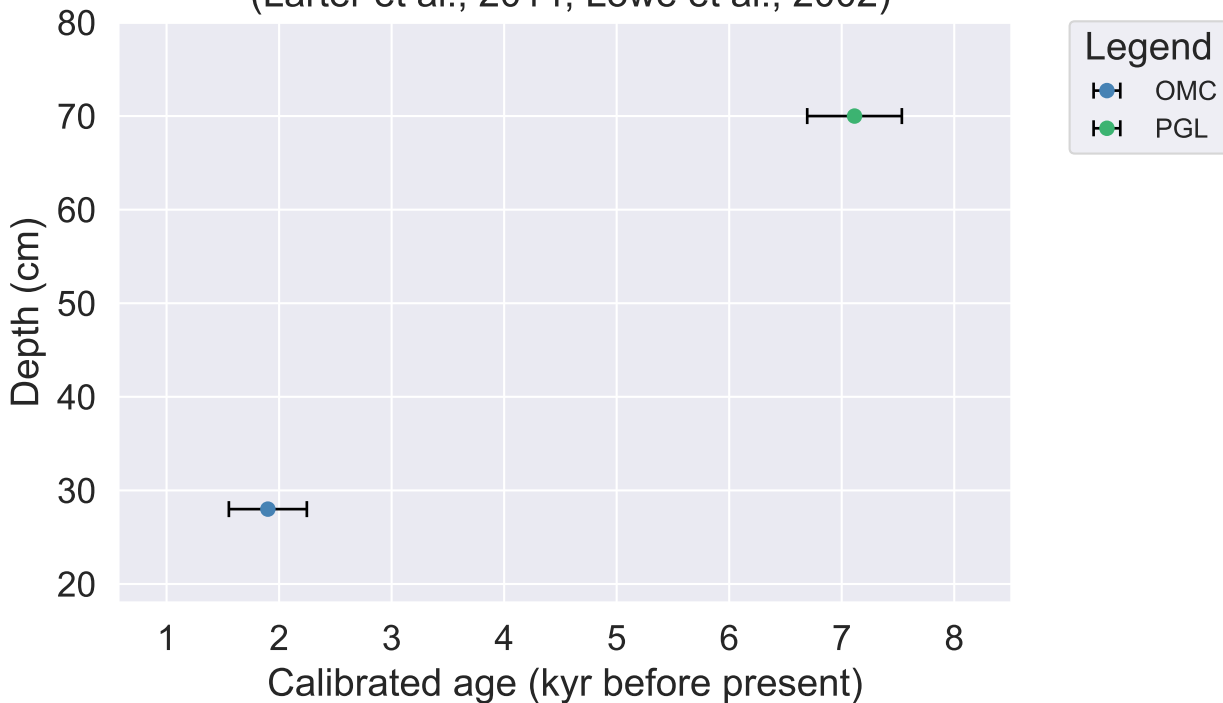

Marine core ages and interpretations at site: 2517  
(Larter et al., 2014; Kirshner et al., 2012; Jakobsson et al., 2011)

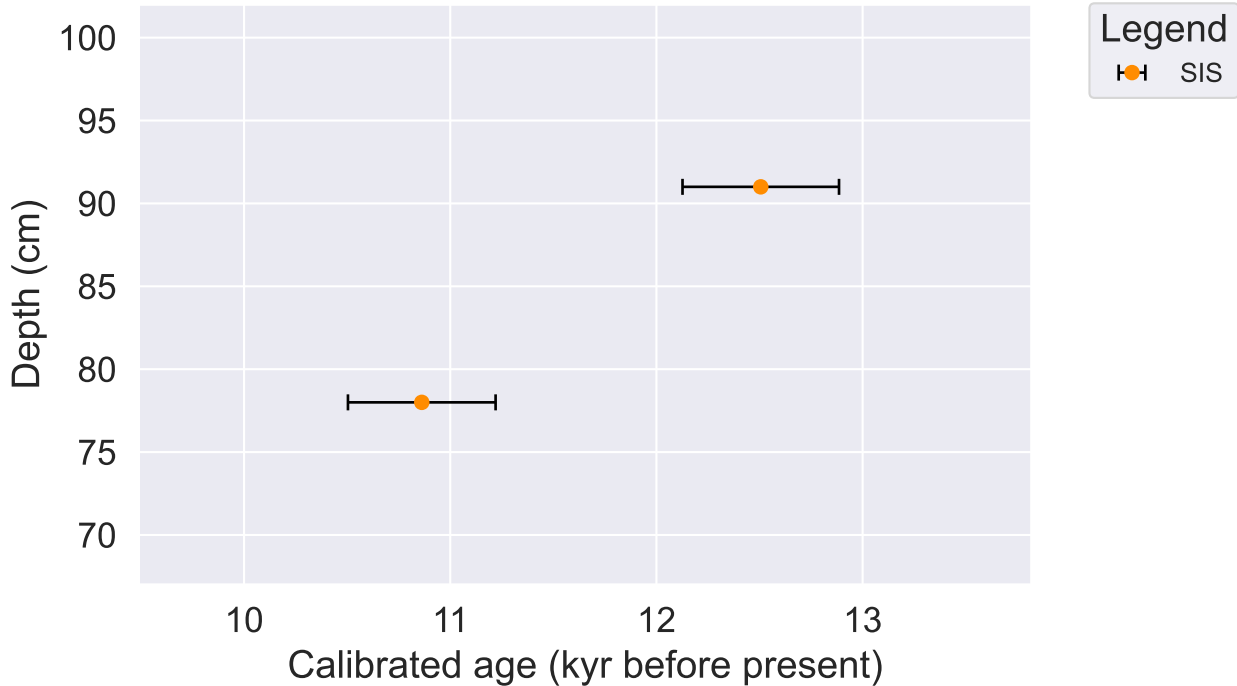

# Marine core ages and interpretations at site: 2518 (Larter et al., 2014; Lowe et al., 2002)

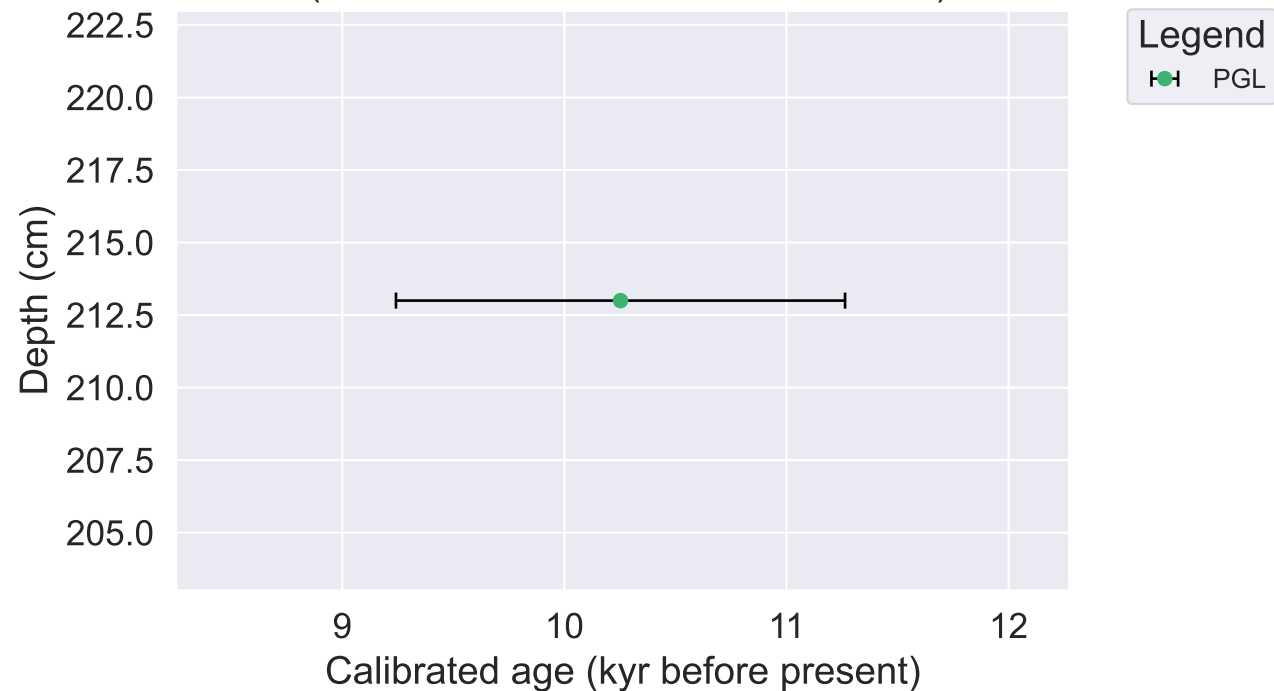

# Marine core ages and interpretations at site: 2519 (Larter et al., 2014; Hillenbrand et al., 2013)

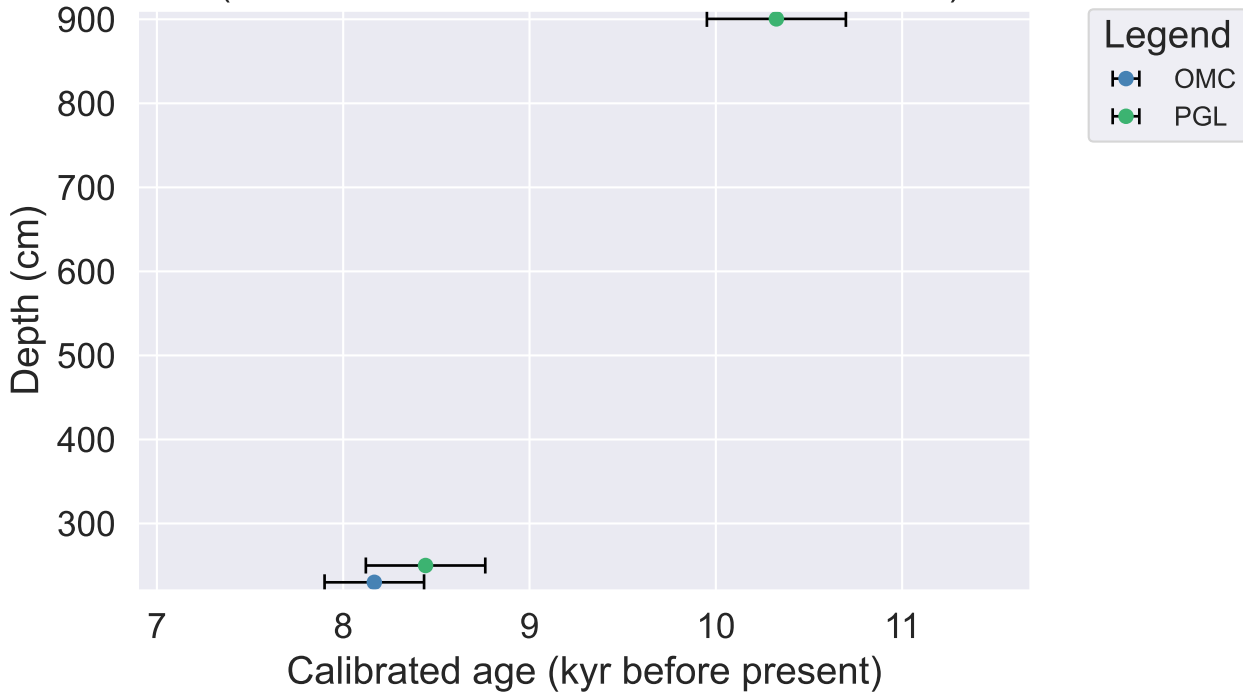

Marine core ages and interpretations at site: 2520  
(Larter et al., 2014; Hillenbrand et al., 2013)

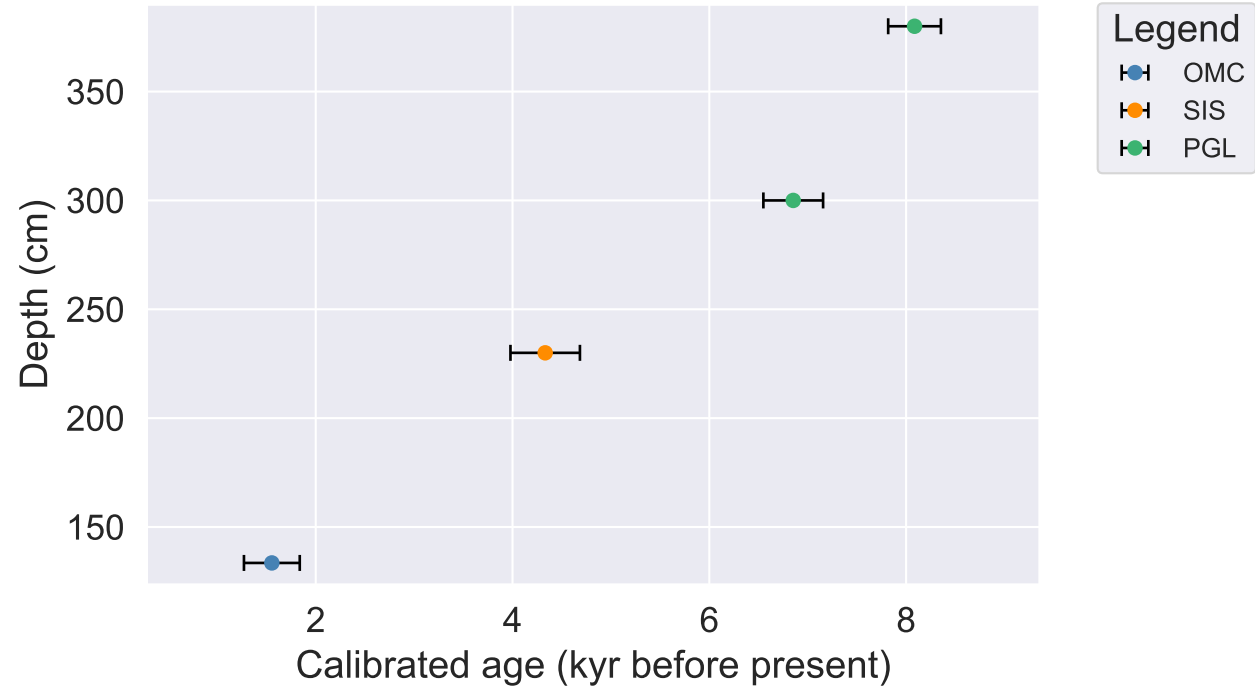

Marine core ages and interpretations at site: 2521  
(Larter et al., 2014; Hillenbrand et al., 2010)

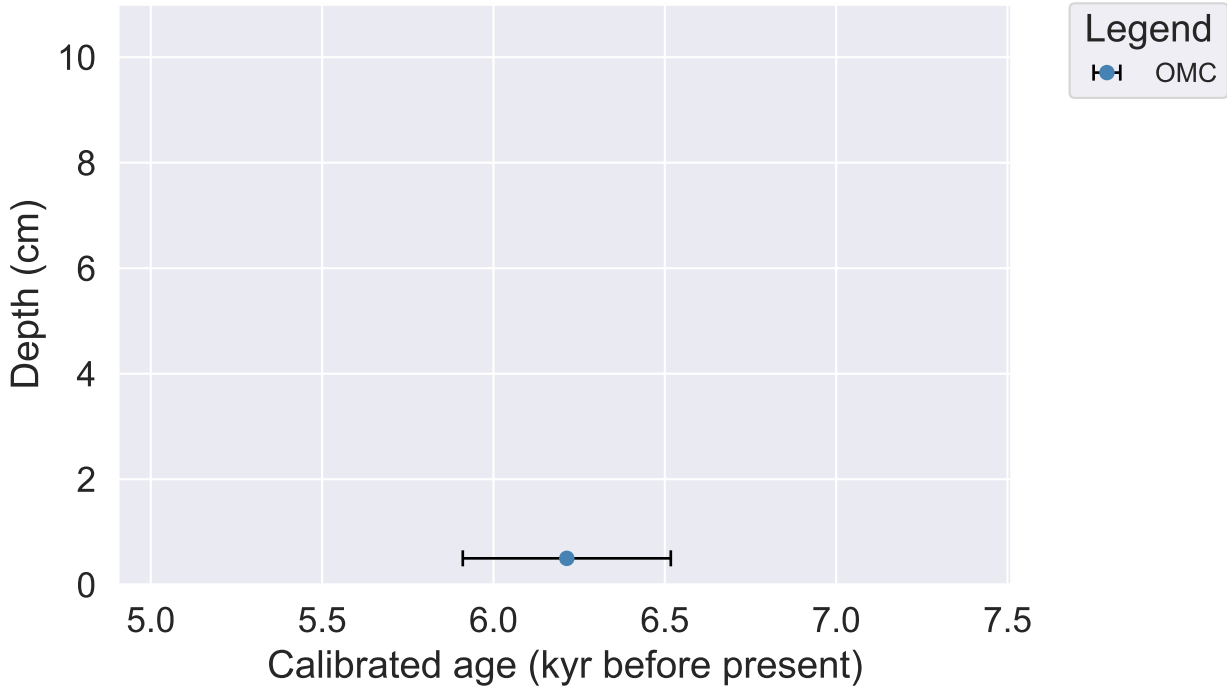

Marine core ages and interpretations at site: 2522  
(Larter et al., 2014; Hillenbrand et al., 2010)

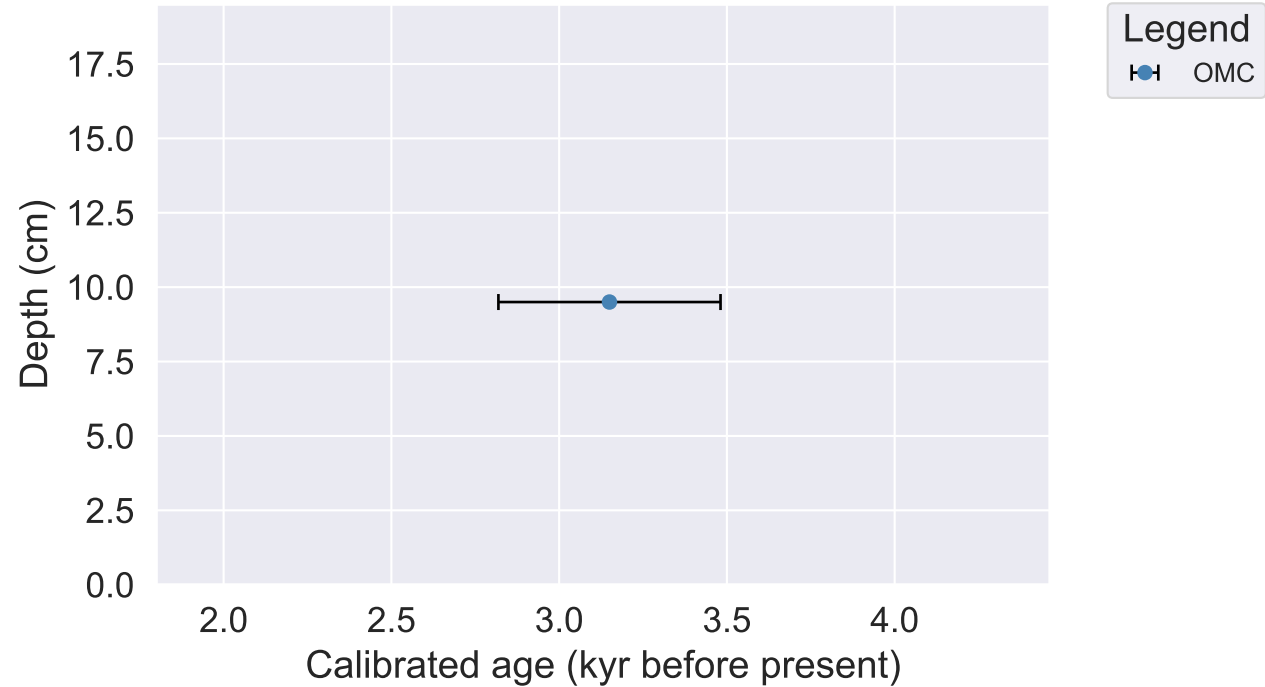



Marine core ages and interpretations at site: 2523  
(Larter et al., 2014; Hillenbrand et al., 2010)

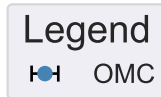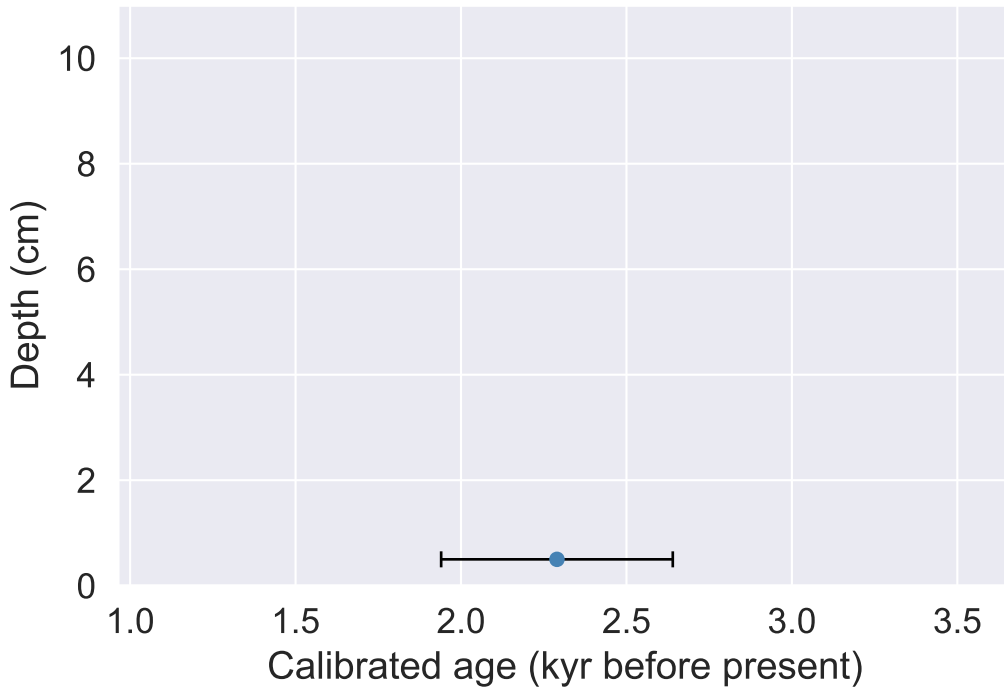

Marine core ages and interpretations at site: 2524  
(Larter et al., 2014; Hillenbrand et al., 2010)

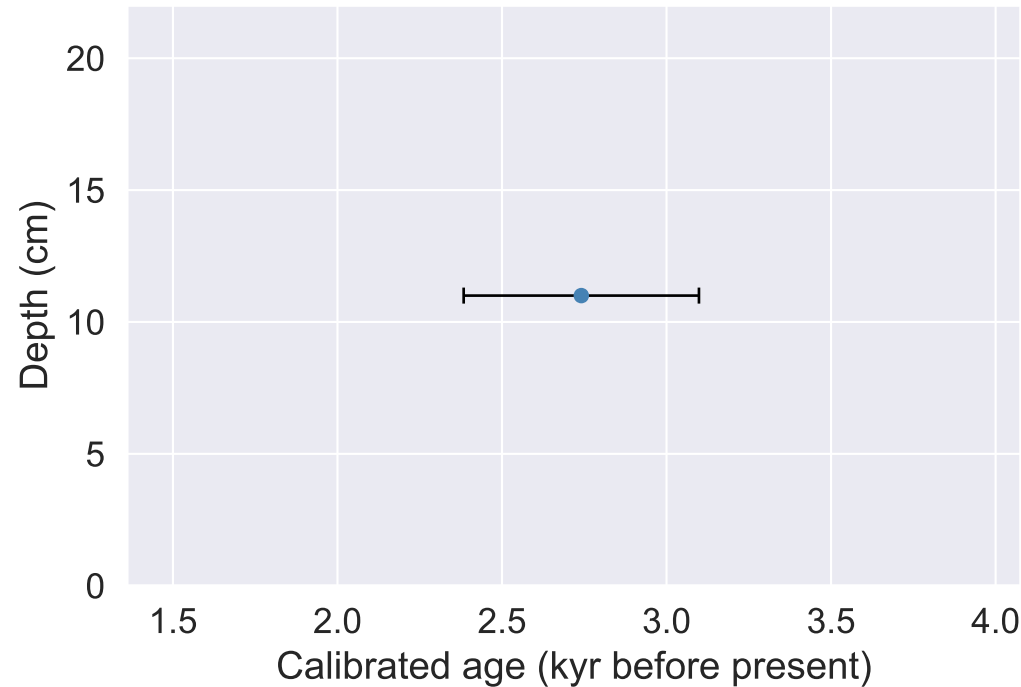

Marine core ages and interpretations at site: 2525  
(Larter et al., 2014; Hillenbrand et al., 2010)

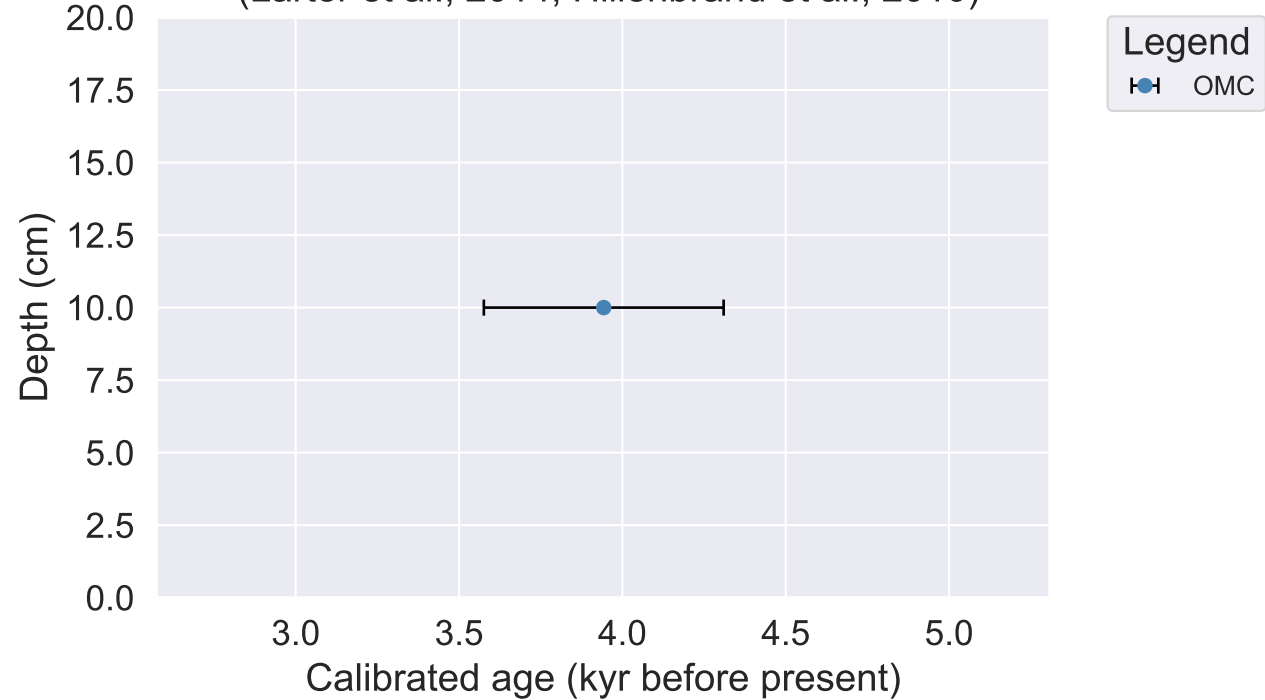

Marine core ages and interpretations at site: 2601  
(Larter et al., 2014; Hillenbrand et al., 2010)

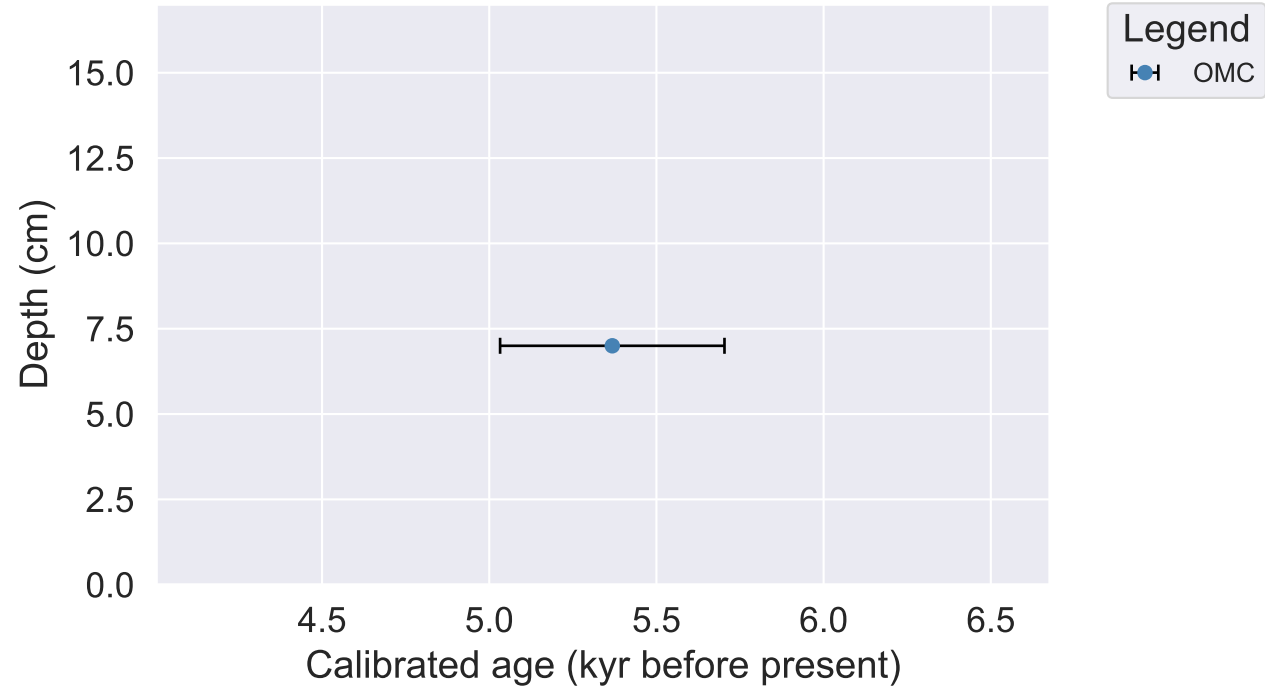

# Marine core ages and interpretations at site: 2602 (Cofaigh et al., 2014; Heroy et al., 2007)

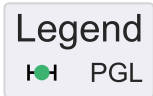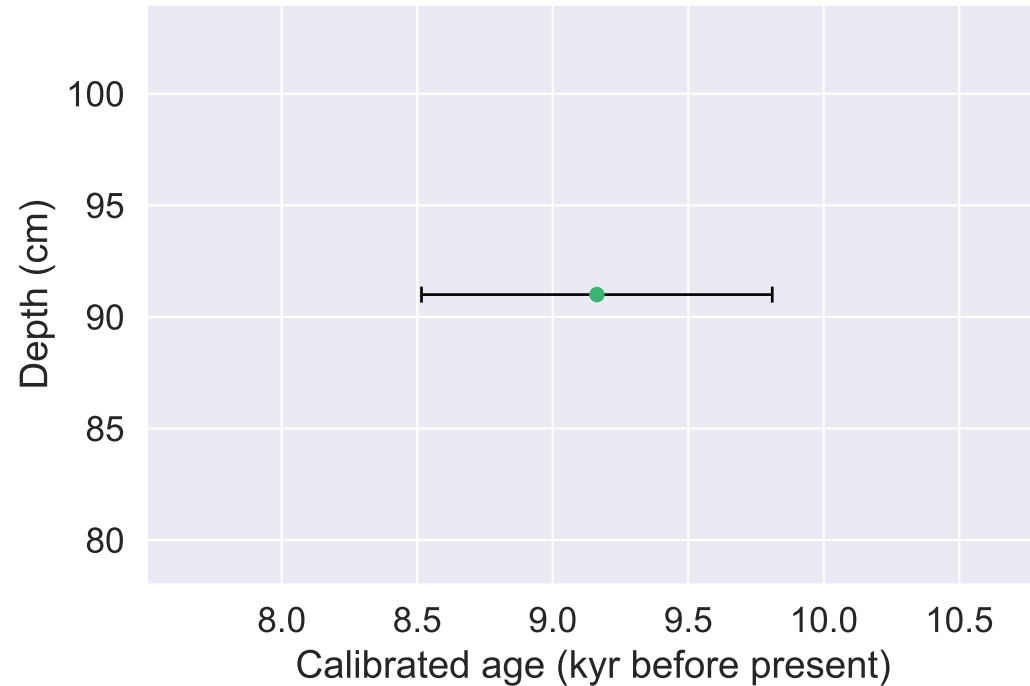

# Marine core ages and interpretations at site: 2603 (Cofaigh et al., 2014; Heroy et al., 2007)

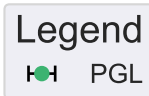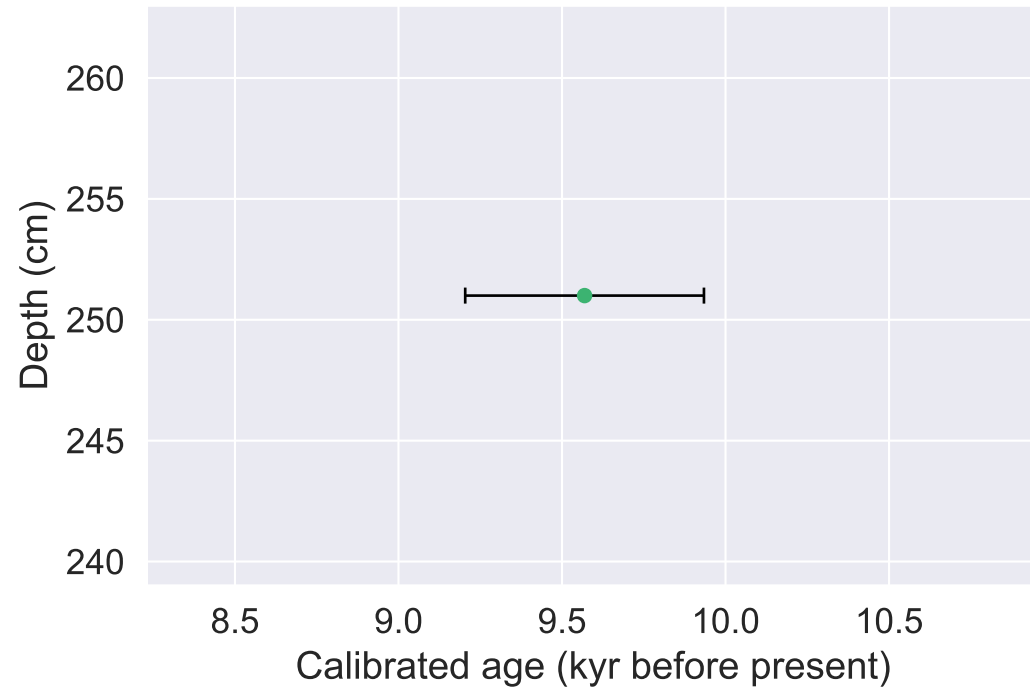

Marine core ages and interpretations at site: 2604  
(Cofaigh et al., 2014; Kilfeather et al., 2011)

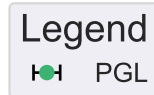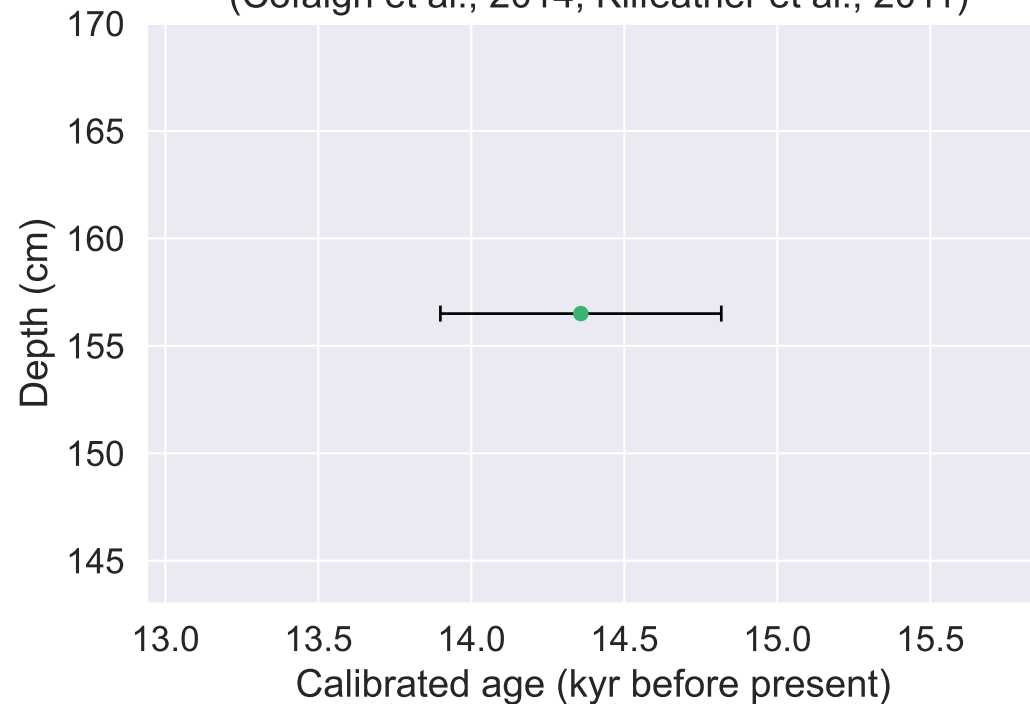

# Marine core ages and interpretations at site: 2605 (Cofaigh et al., 2014; Pope et al., 1992)

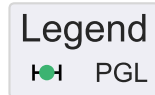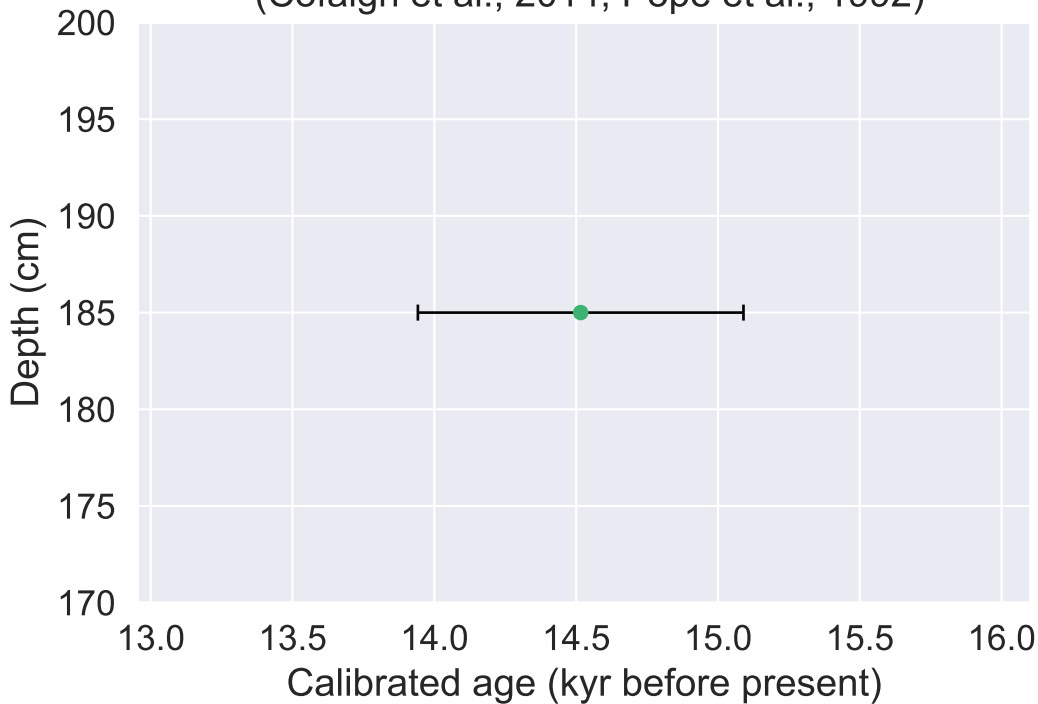



# Marine core ages and interpretations at site: 2606 (Cofaigh et al., 2014; Pope et al., 1992)

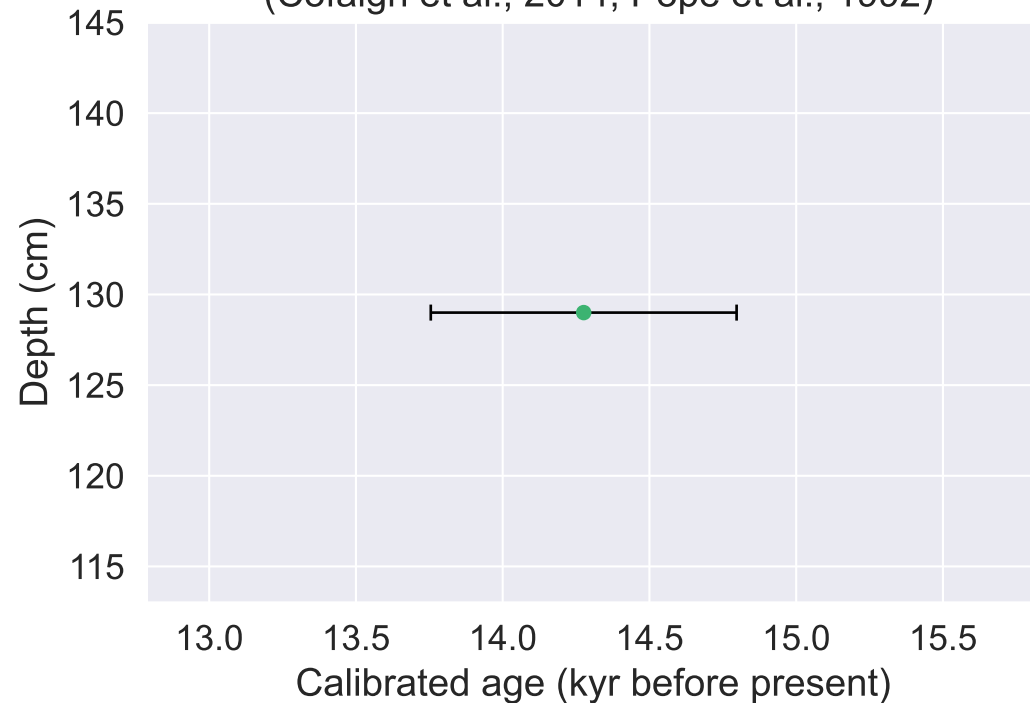

# Marine core ages and interpretations at site: 2607 (Cofaigh et al., 2014; Heroy et al., 2007)

Legend

HH PGL

Depth (cm)

810

805

800

795

790

785

8.0

8.5

9.0

9.5

10.0

Calibrated age (kyr before present)

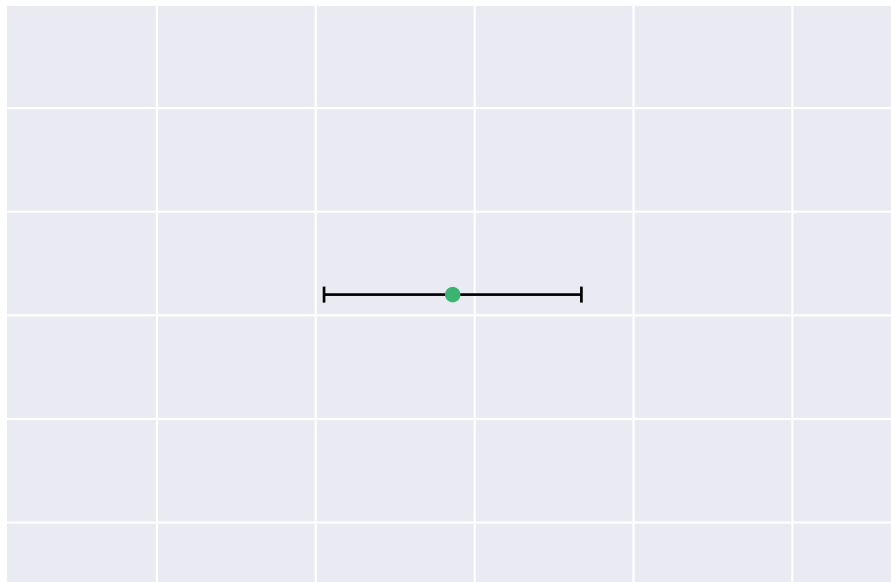

Marine core ages and interpretations at site: 2608  
(Cofaigh et al., 2014; Heroy et al., 2007)

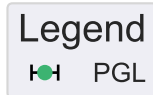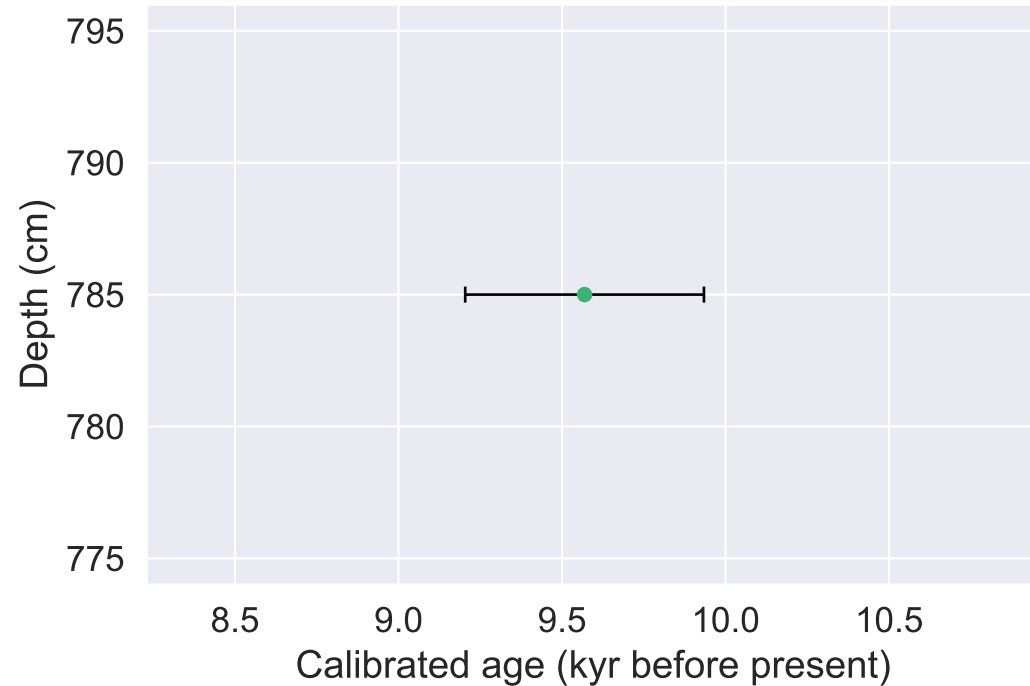

Marine core ages and interpretations at site: 2610  
(Cofaigh et al., 2014; Shevenell et al., 1996)

Legend

HH PGL

Depth (cm)

470

465

460

455

450

8.0

8.5

9.0

9.5

10.0

10.5

Calibrated age (kyr before present)

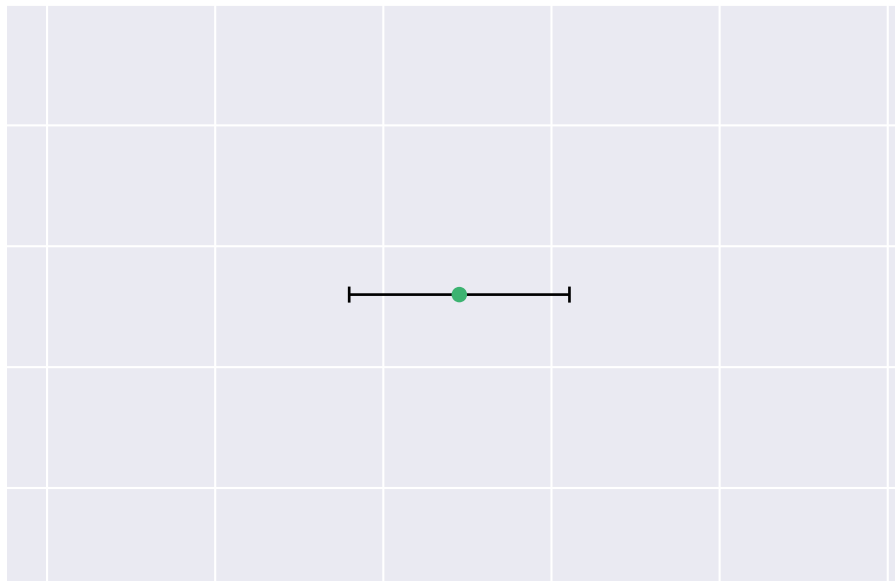

Marine core ages and interpretations at site: 2611  
(Cofaigh et al., 2014; Heroy et al., 2007)

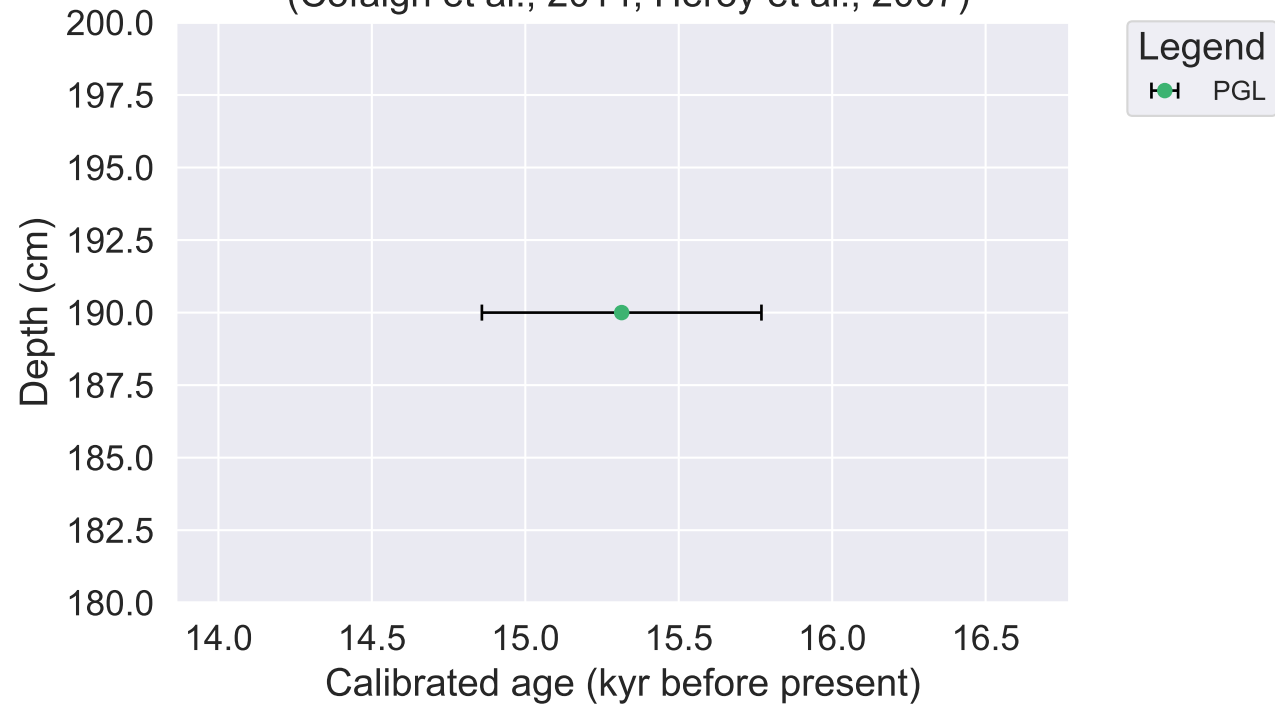

Marine core ages and interpretations at site: 2612  
(Cofaigh et al., 2014; Heroy et al., 2007)

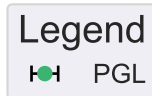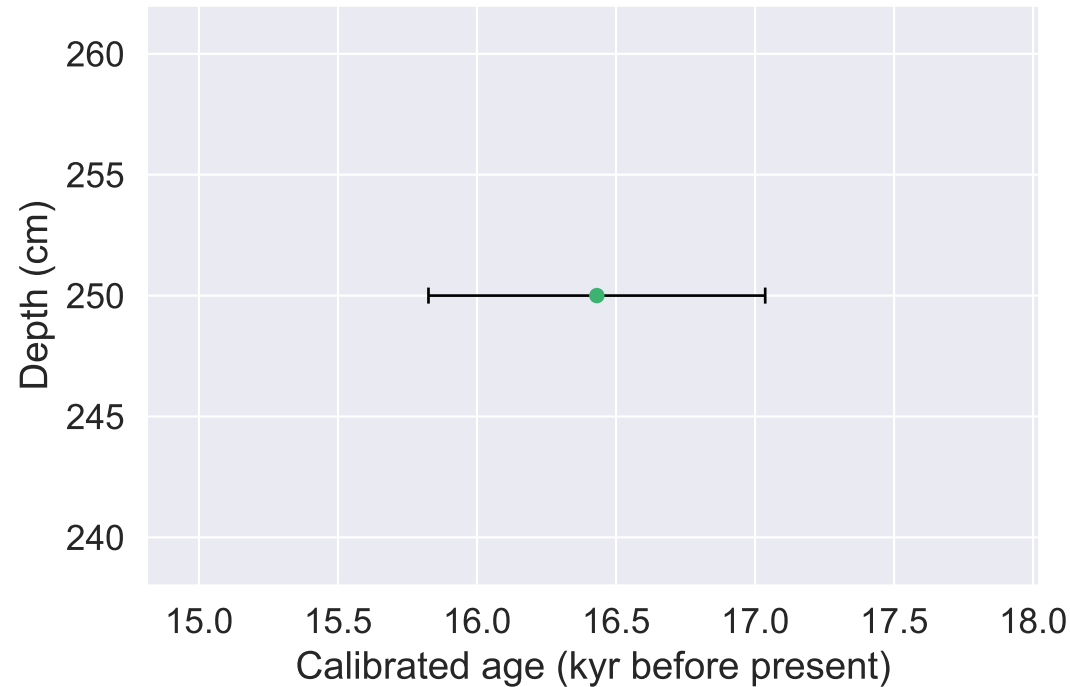

Marine core ages and interpretations at site: 2613  
(Cofaigh et al., 2014; Heroy et al., 2007)

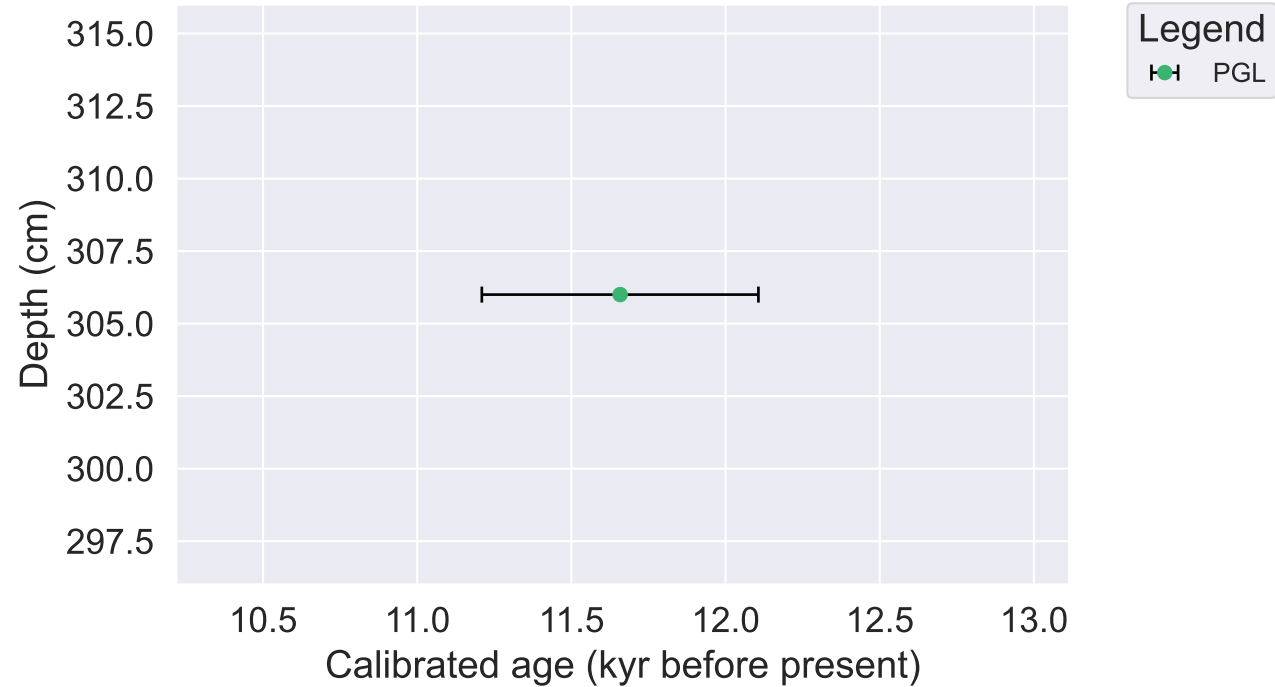

Marine core ages and interpretations at site: 2614  
(Cofaigh et al., 2014; Domack et al., 2001)

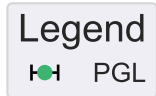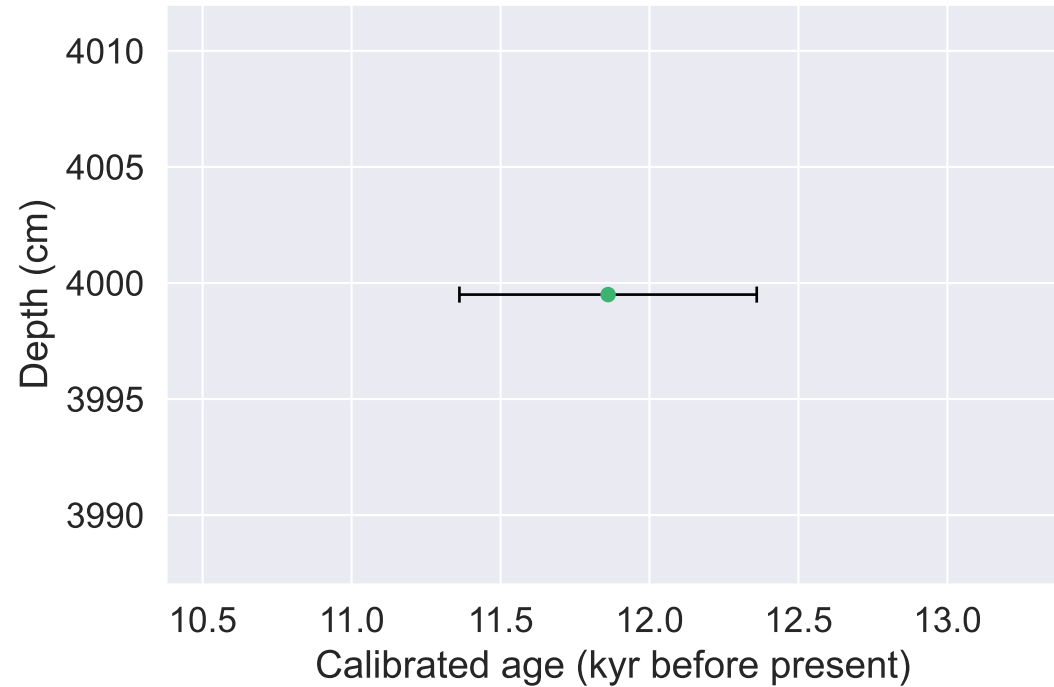



Marine core ages and interpretations at site: 2615  
(Cofaigh et al., 2014; Heroy et al., 2007)

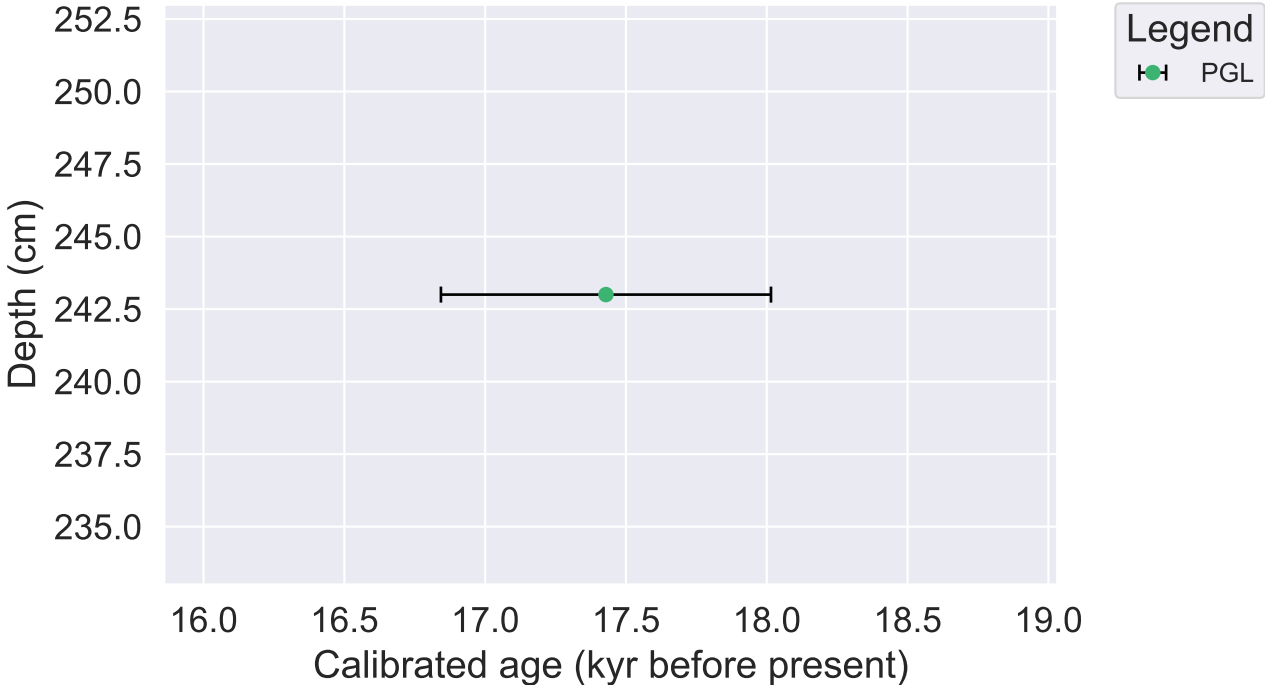

# Marine core ages and interpretations at site: 2616 (Cofaigh et al., 2014; Heroy et al., 2007)

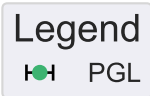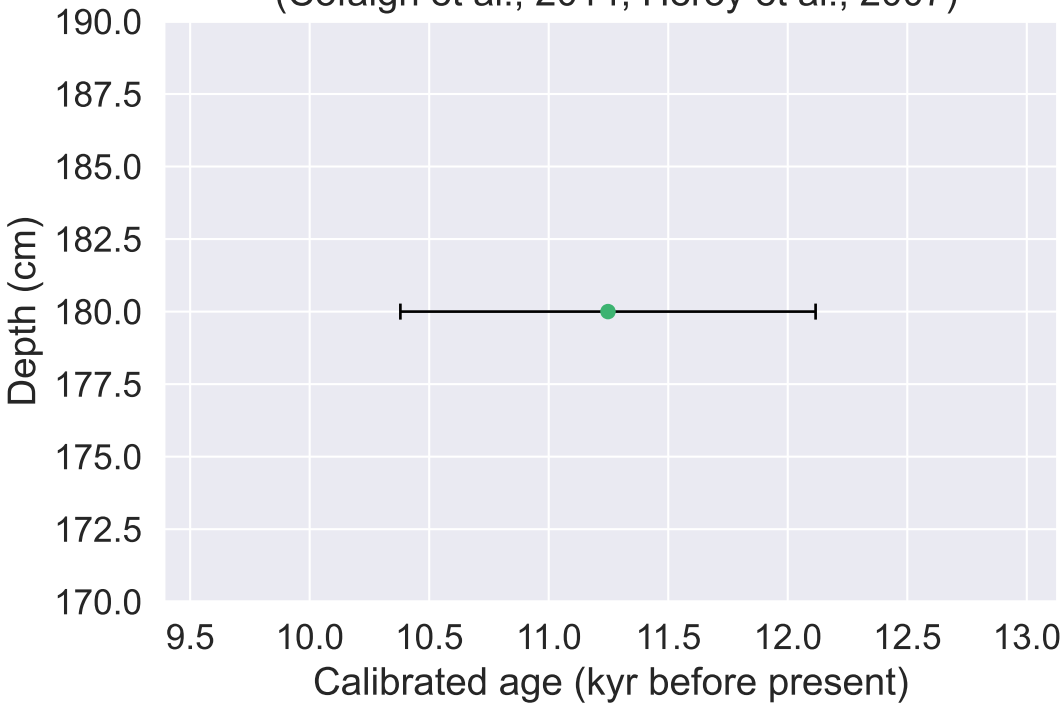

# Marine core ages and interpretations at site: 2617 (Cofaigh et al., 2014; Milliken et al., 2009)

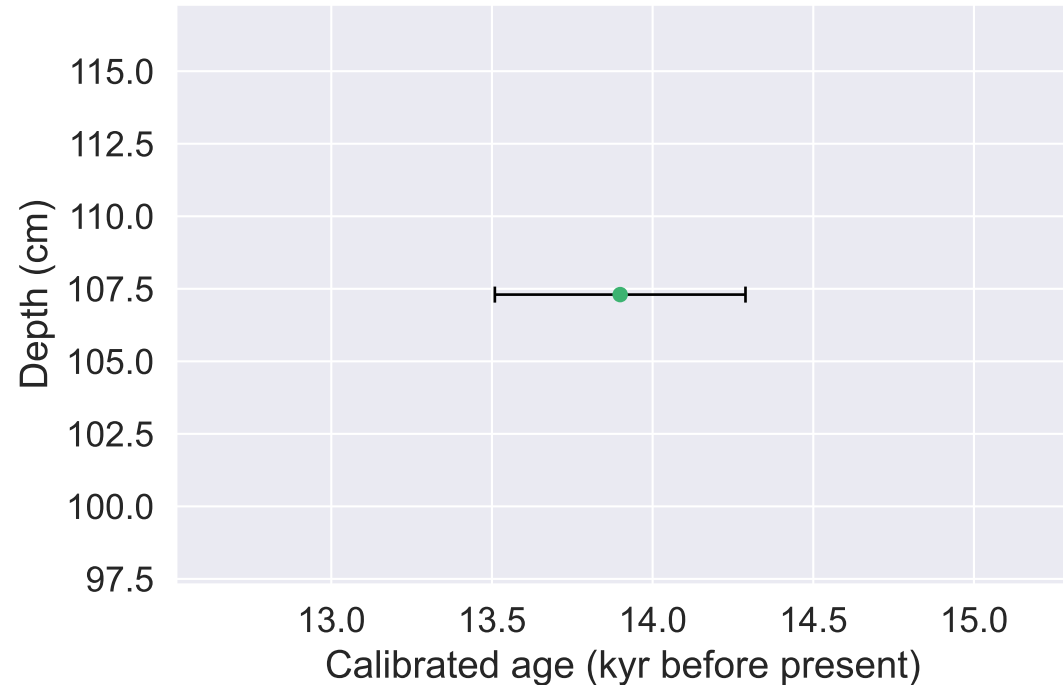

Marine core ages and interpretations at site: 2618  
(Cofaigh et al., 2014; Banfield et al., 1997)

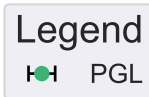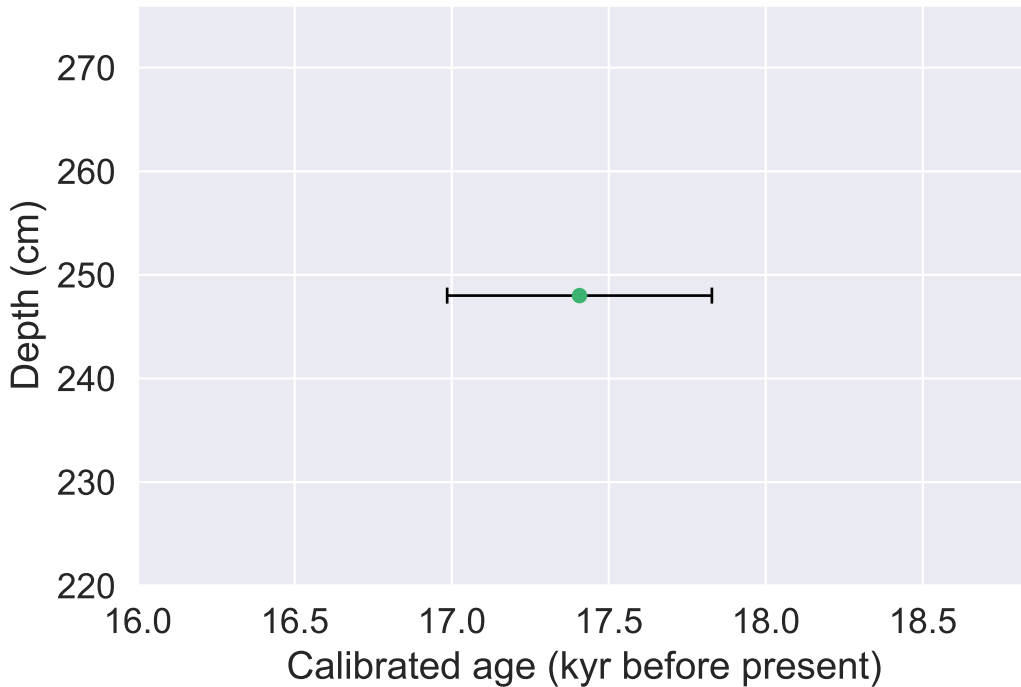

Marine core ages and interpretations at site: 2619  
(Cofaigh et al., 2014; Smith et al., 2010)

Legend  
● OMC

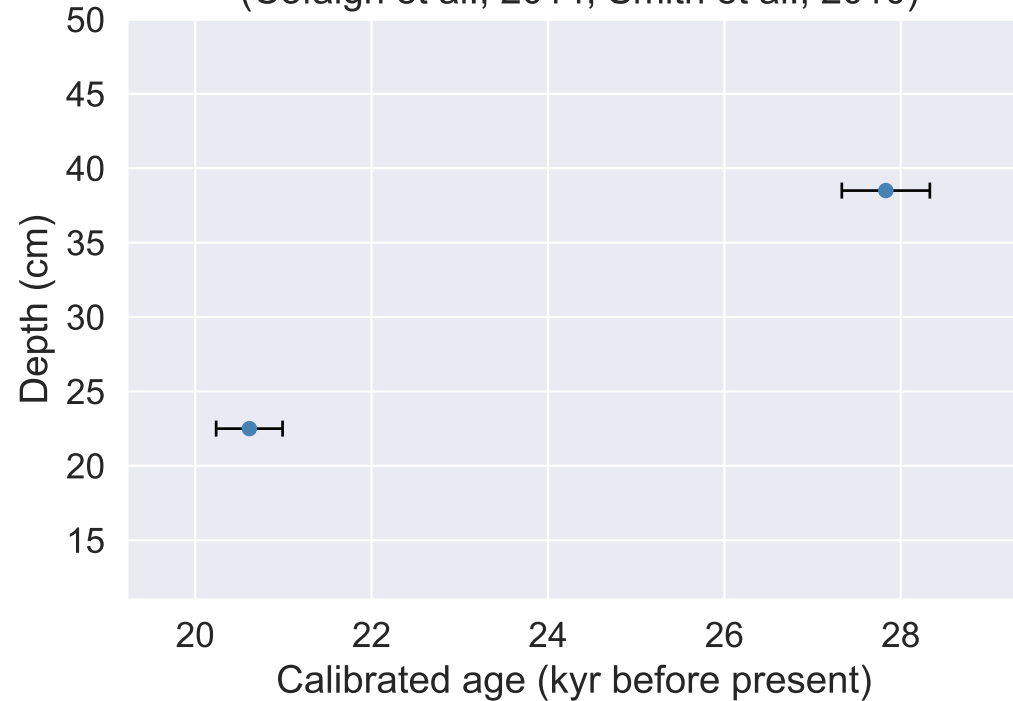

Marine core ages and interpretations at site: 2620  
(Cofaigh et al., 2014; Smith et al., 2010)

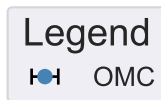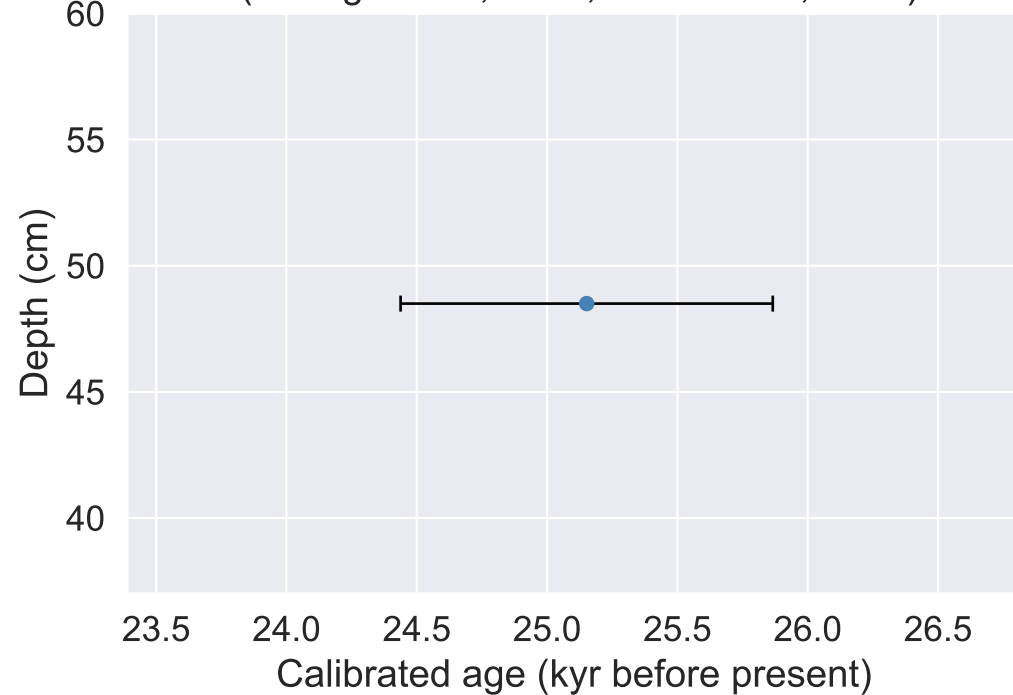

Marine core ages and interpretations at site: 2621  
(Cofaigh et al., 2014; Smith et al., 2010)

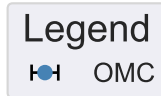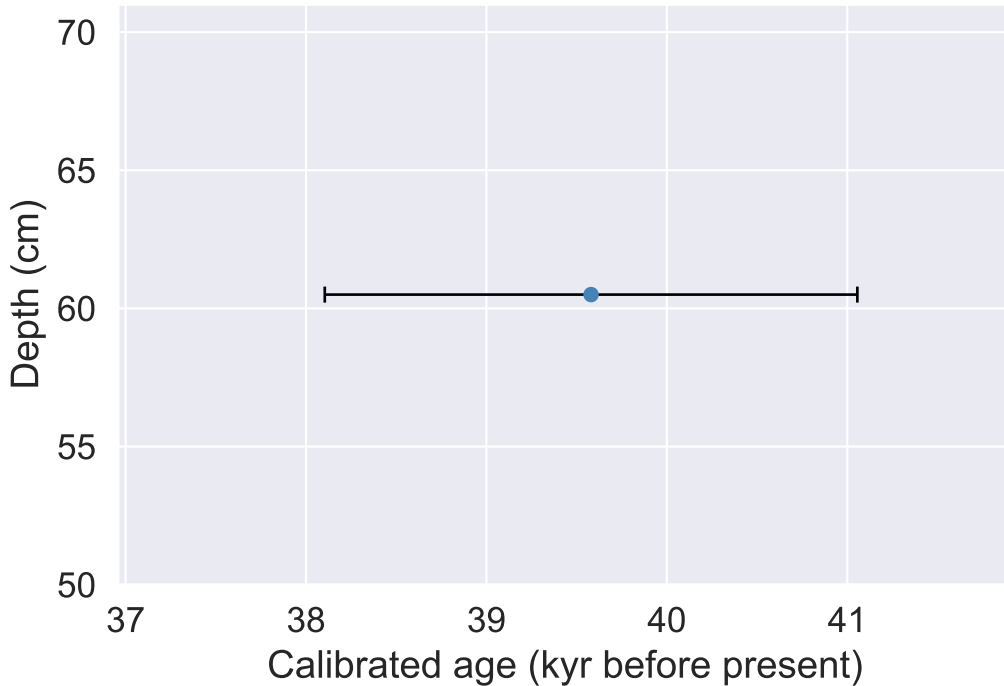

Marine core ages and interpretations at site: 2622  
(Cofaigh et al., 2014; Heroy et al., 2007)

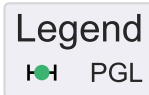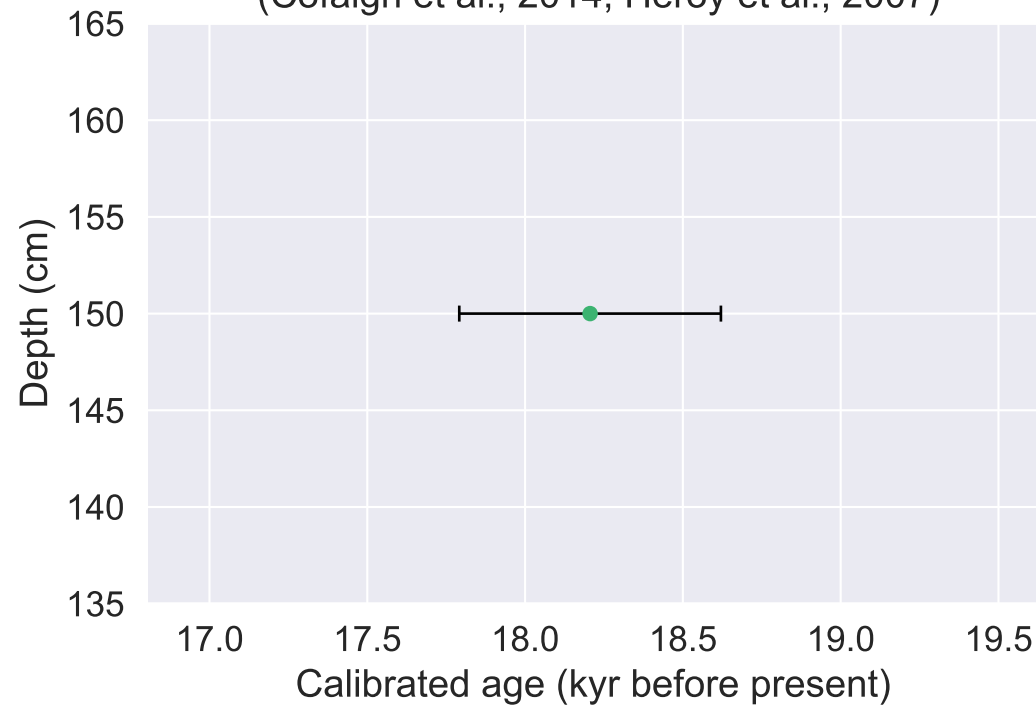



Marine core ages and interpretations at site: 2623  
(Cofaigh et al., 2014; Michalchuk et al., 2009)

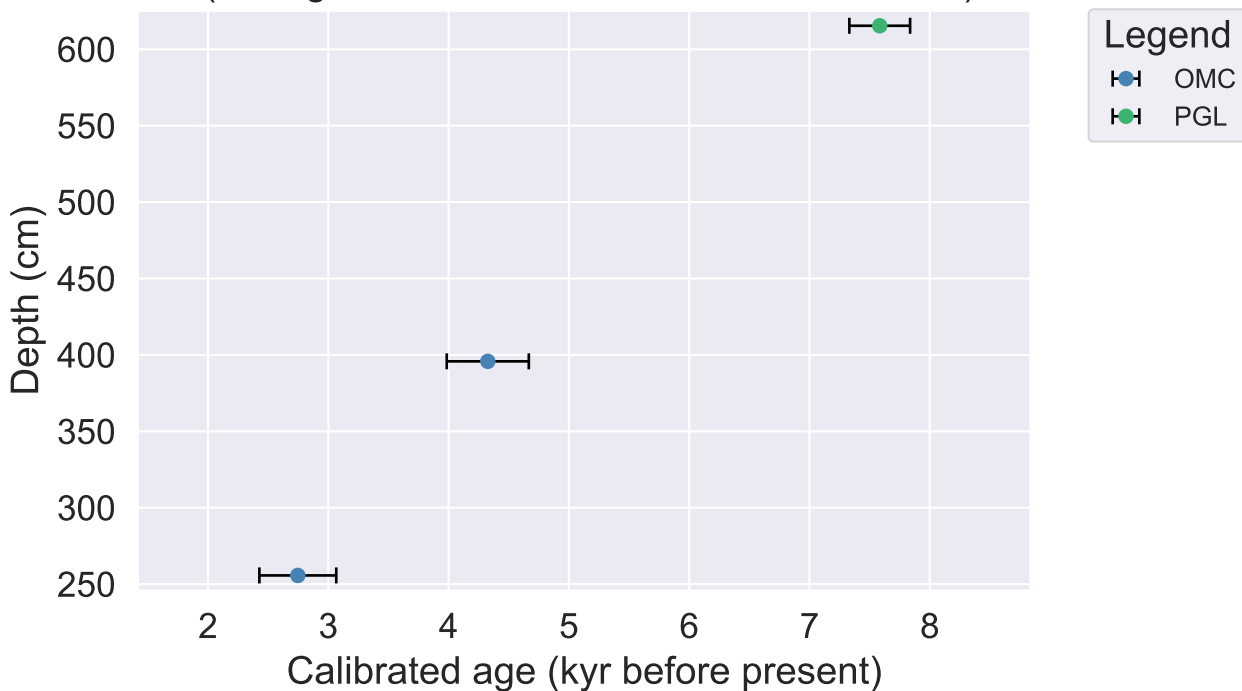

# Marine core ages and interpretations at site: 2624 (Cofaigh et al., 2014; Domack et al., 2005)

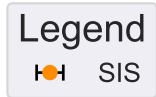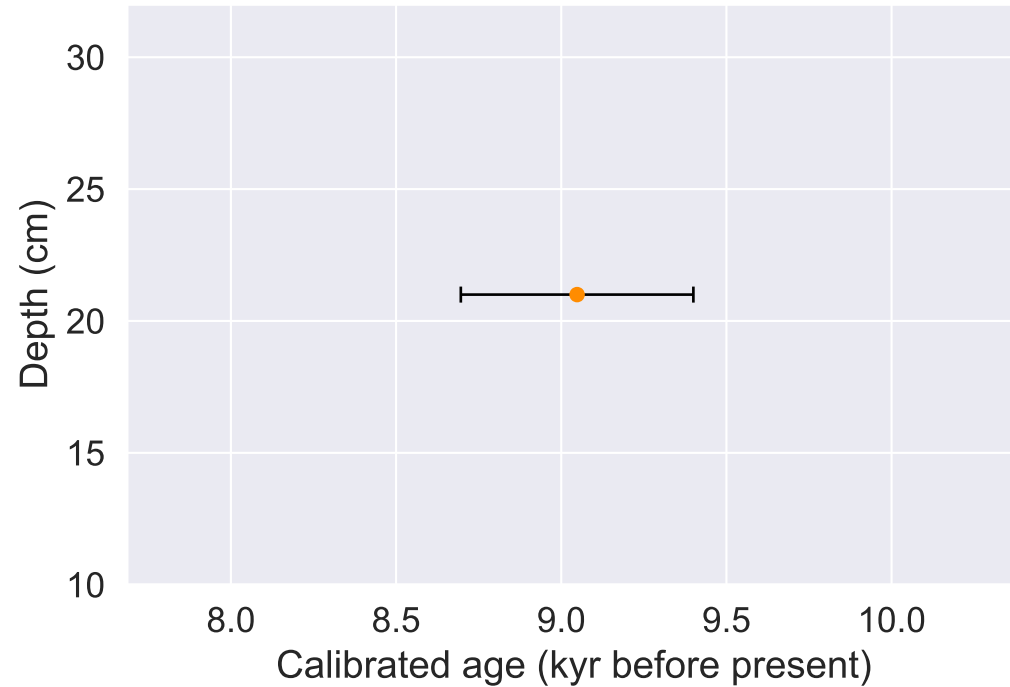

# Marine core ages and interpretations at site: 2701

(Hedges et al., 1995; Crawford et al., 1996; Hillenbrand et al., 2014)

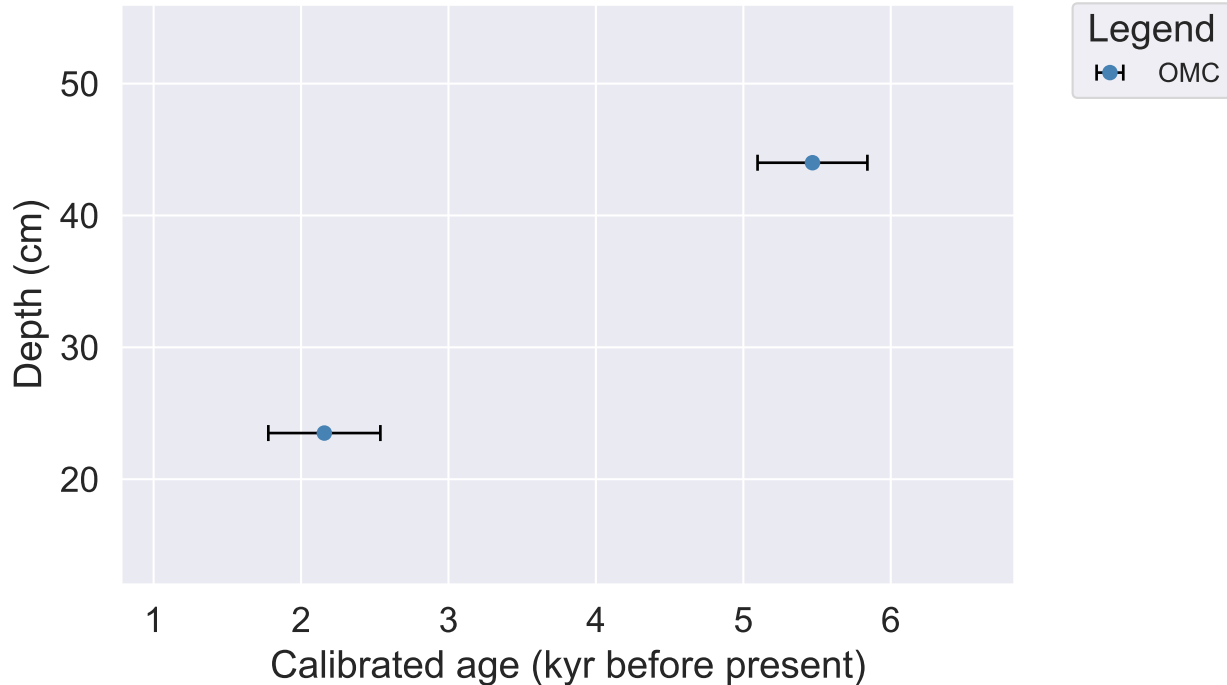

Marine core ages and interpretations at site: 2702  
(Stolldorf et al., 2012; Hillenbrand et al., 2014)

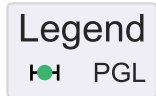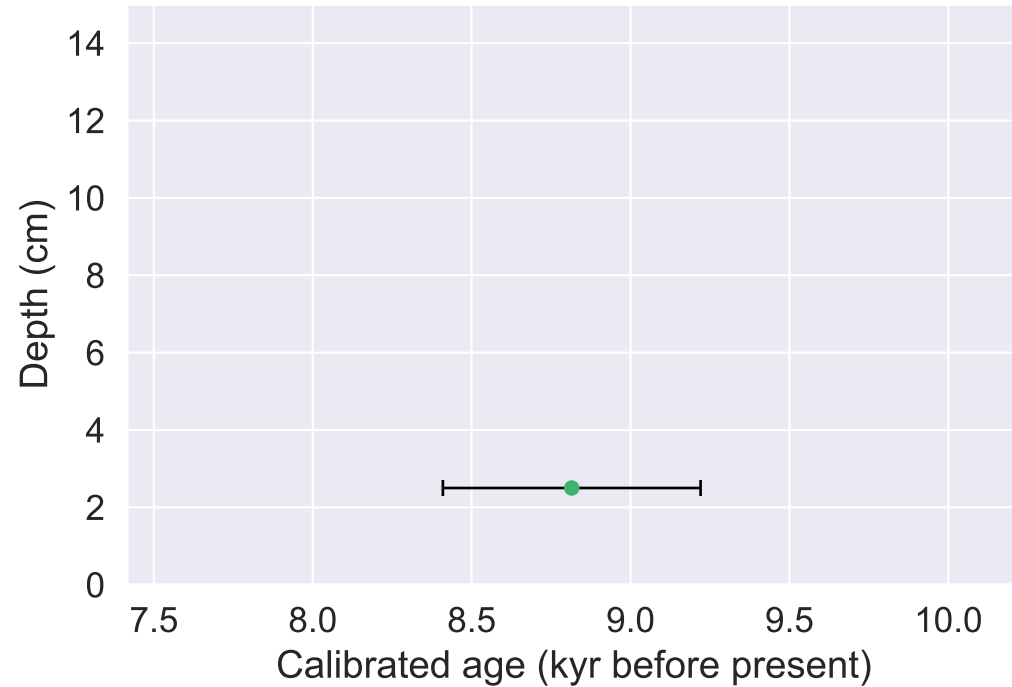

Marine core ages and interpretations at site: 2703  
(Stolldorf et al., 2012; Hillenbrand et al., 2014)

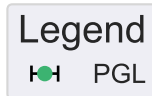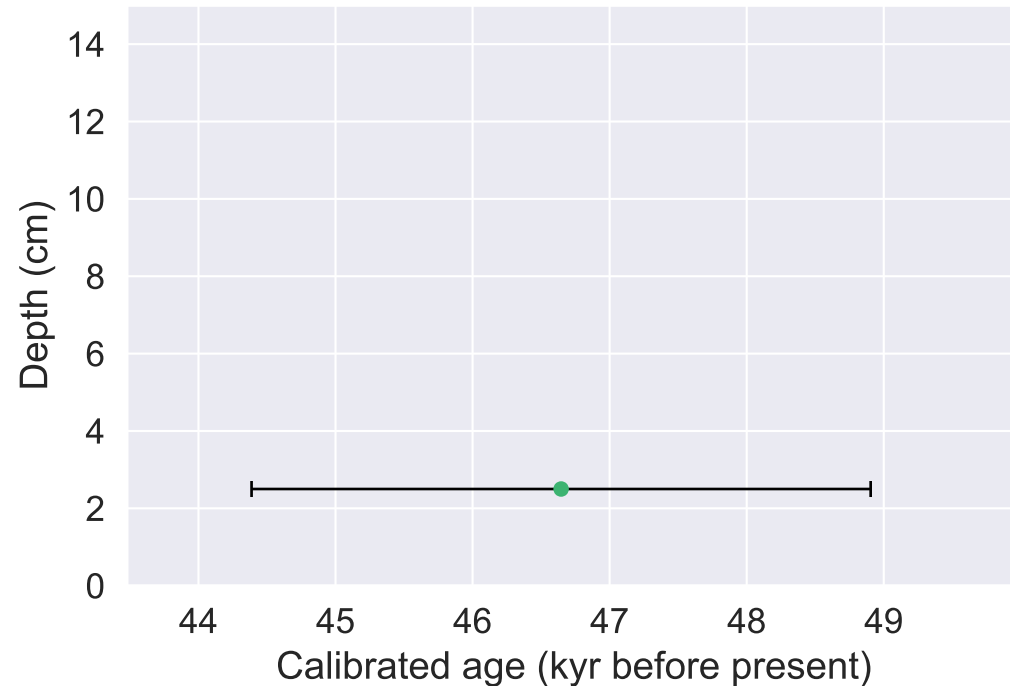

Marine core ages and interpretations at site: 2704  
(Stolldorf et al., 2012; Hillenbrand et al., 2014)

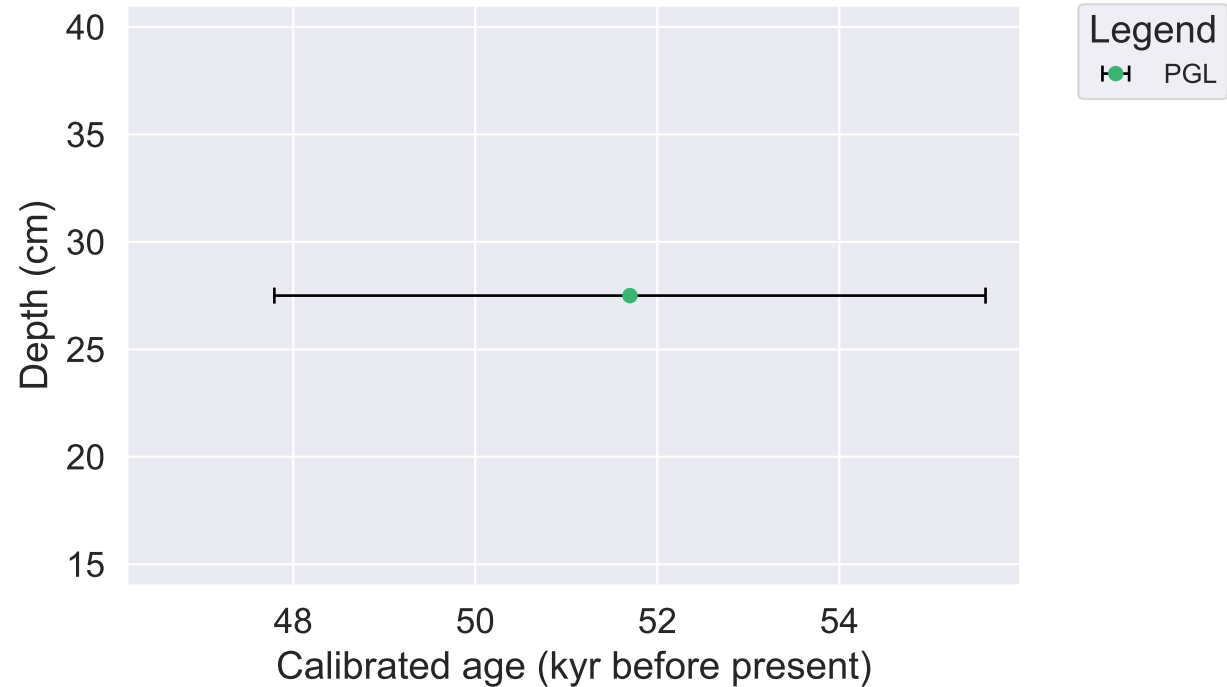

Marine core ages and interpretations at site: 2705  
(Stolldorf et al., 2012; Hillenbrand et al., 2014)

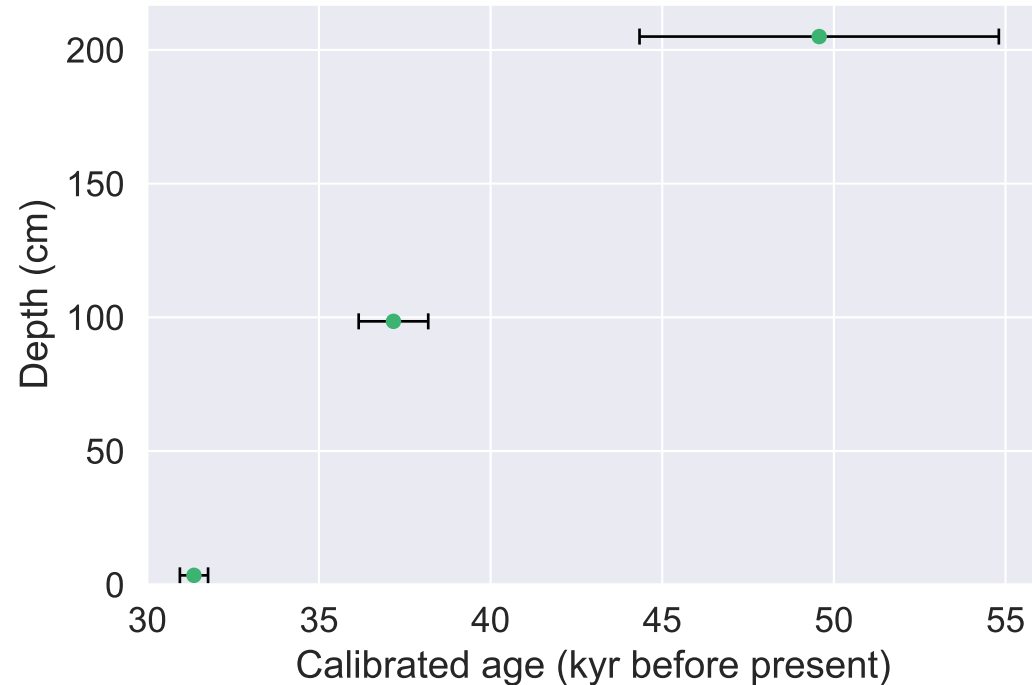

# Marine core ages and interpretations at site: 2706 (Stolldorf et al., 2012; Hillenbrand et al., 2014)

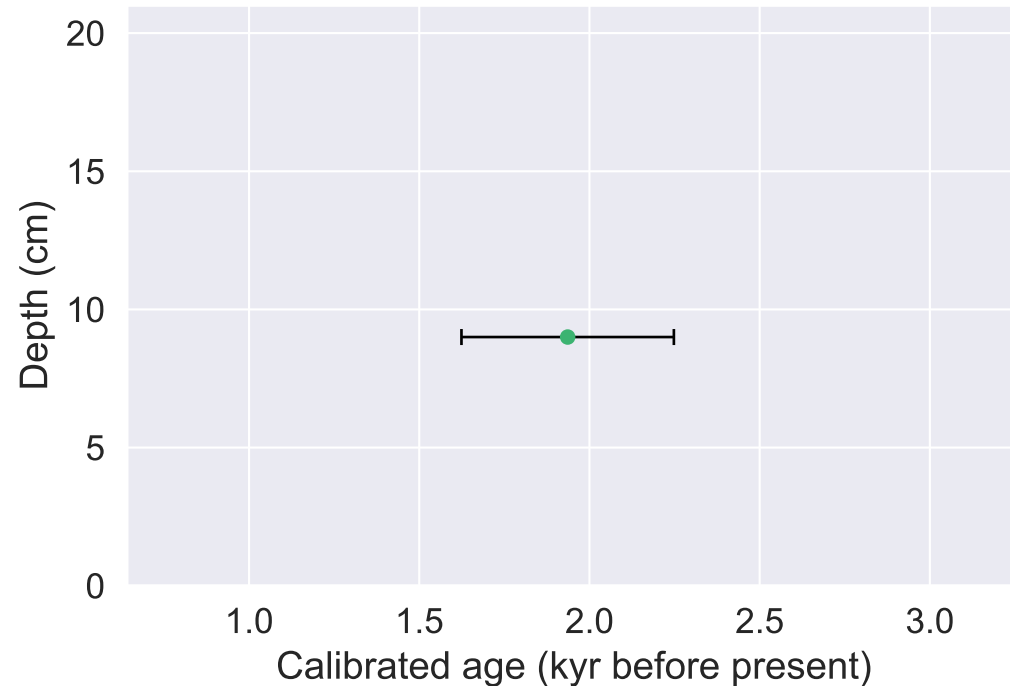



# Marine core ages and interpretations at site: 2707 (Stolldorf et al., 2012; Hillenbrand et al., 2014)

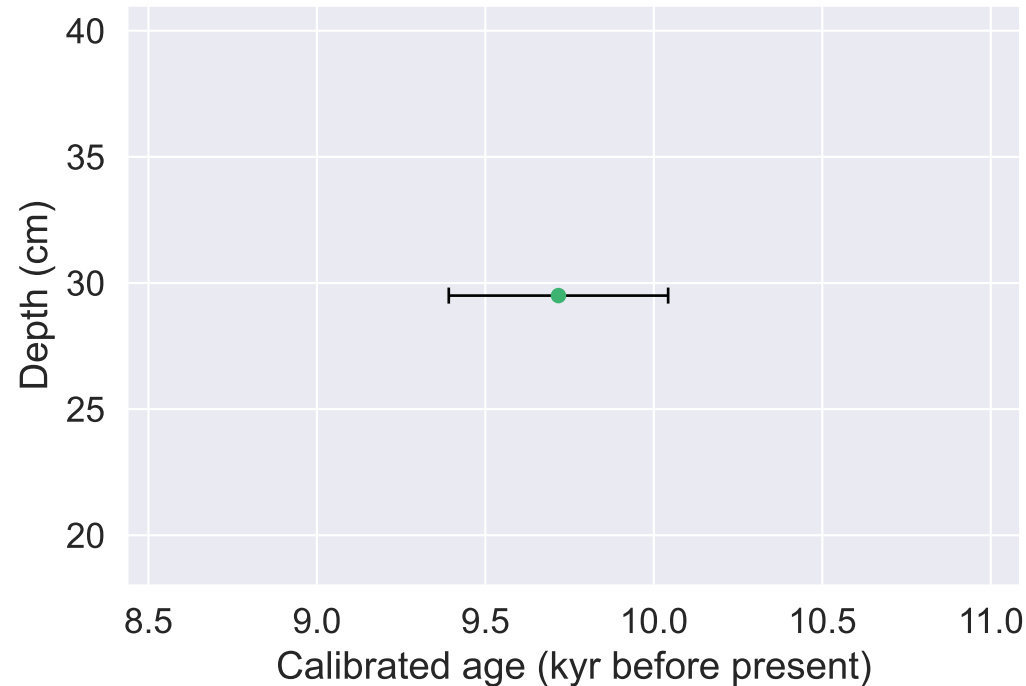

# Marine core ages and interpretations at site: 2708 (Stolldorf et al., 2012; Hillenbrand et al., 2014)

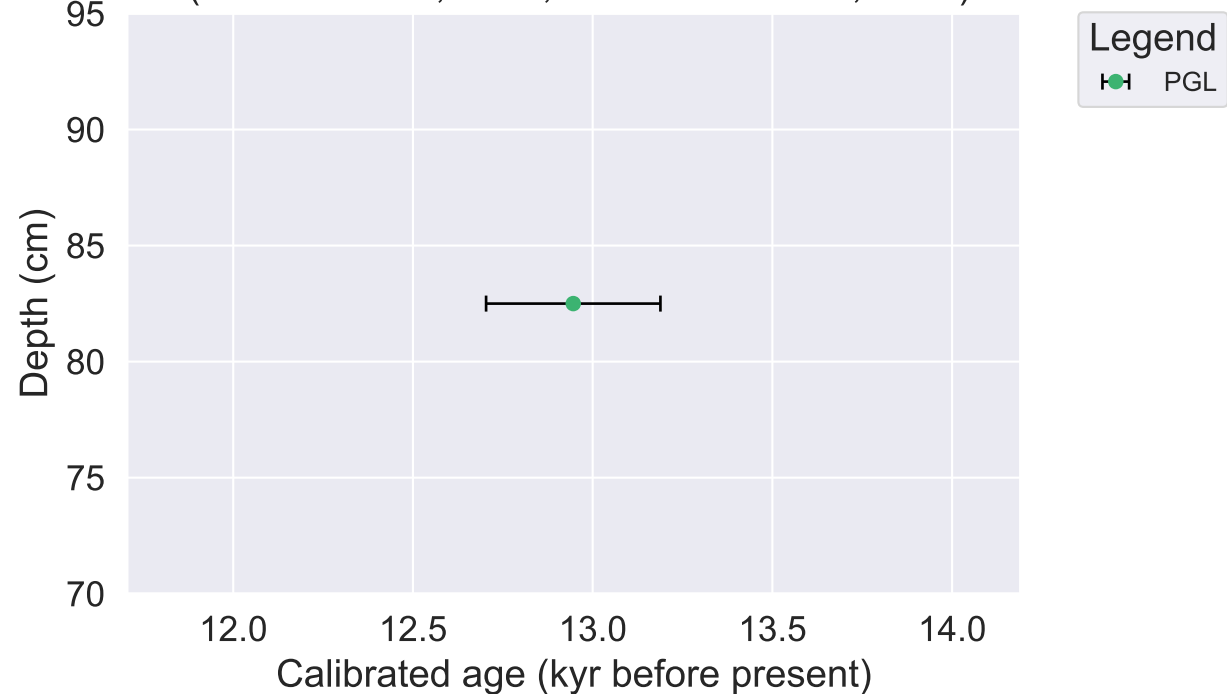

Marine core ages and interpretations at site: 2709  
(Elverhoi et al., 1983; Hillenbrand et al., 2014)

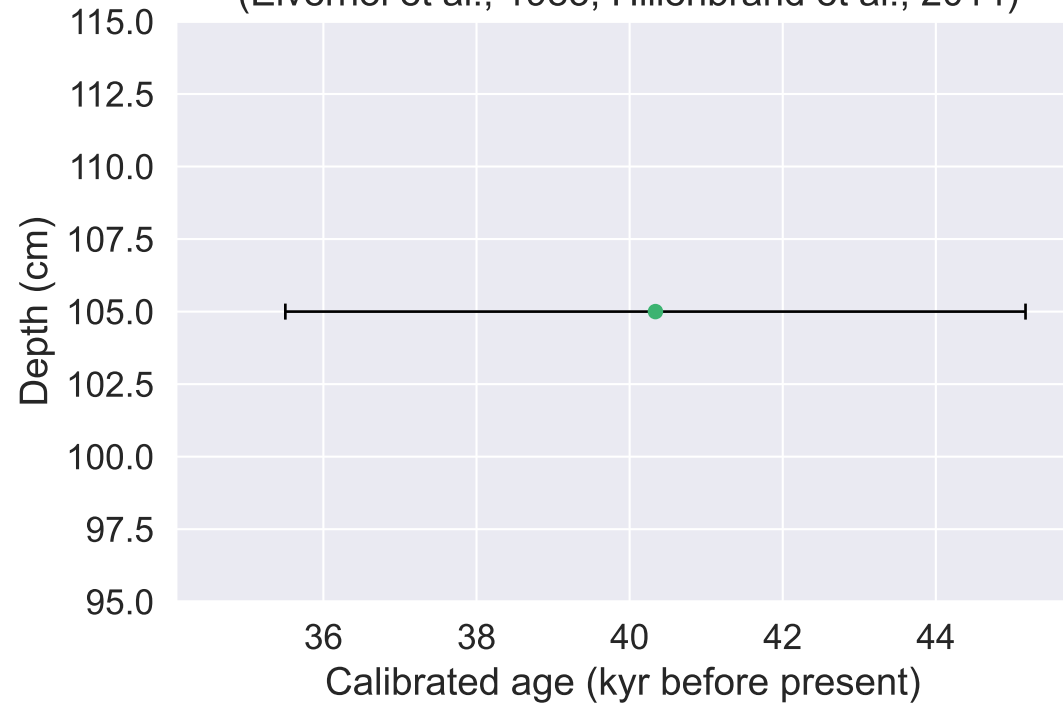

Marine core ages and interpretations at site: 2710  
(Kristoffersen et al., 2000; Hillenbrand et al., 2014)

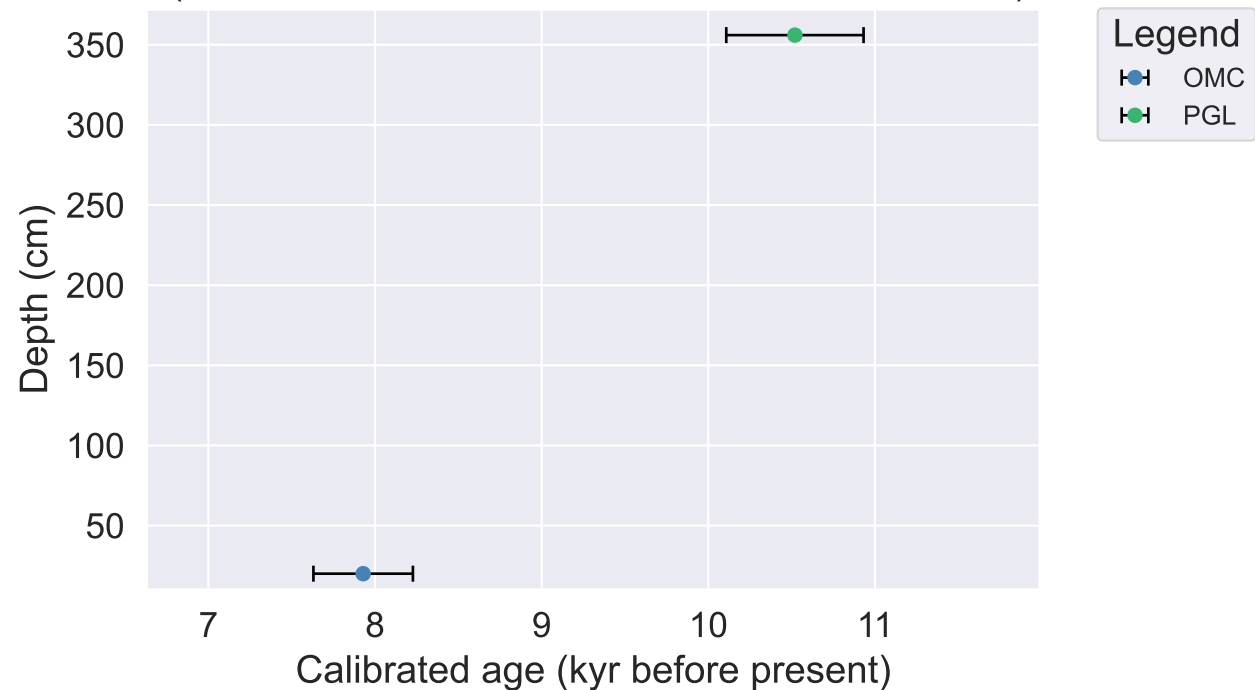

Marine core ages and interpretations at site: 2711  
(Anderson et al., 1999; Smith et al., 2000; Stolldorf et al., 2012)

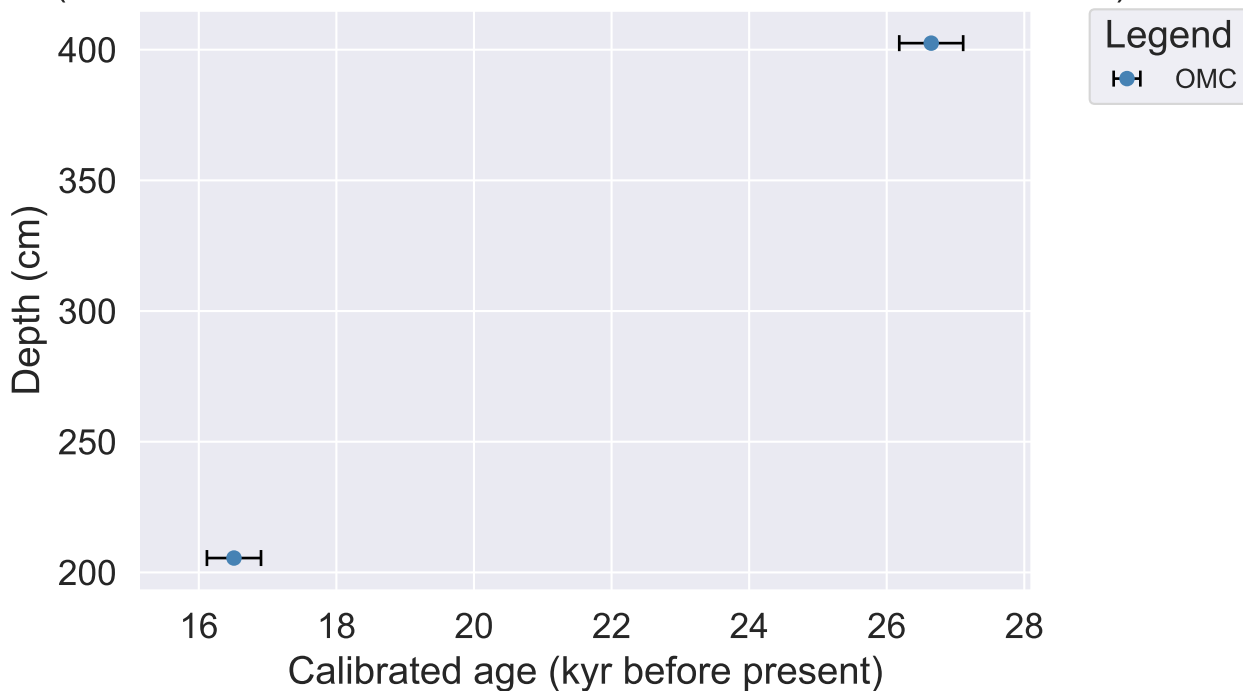

Supplement: Supplementary file 3 [file essd-15-3573-2023-supplement.zip]
