# Supplementary material for: Antarctic Ice Sheet paleo-constraint database
Source: Copernicus journal article supplement (doi:10.5194/essd-15-3573-2023), 2023-08-10

Past relative sea level at site: 9101 (Miura et al., 1998; Verleyen et al., 2017; Takano et al., 2012)

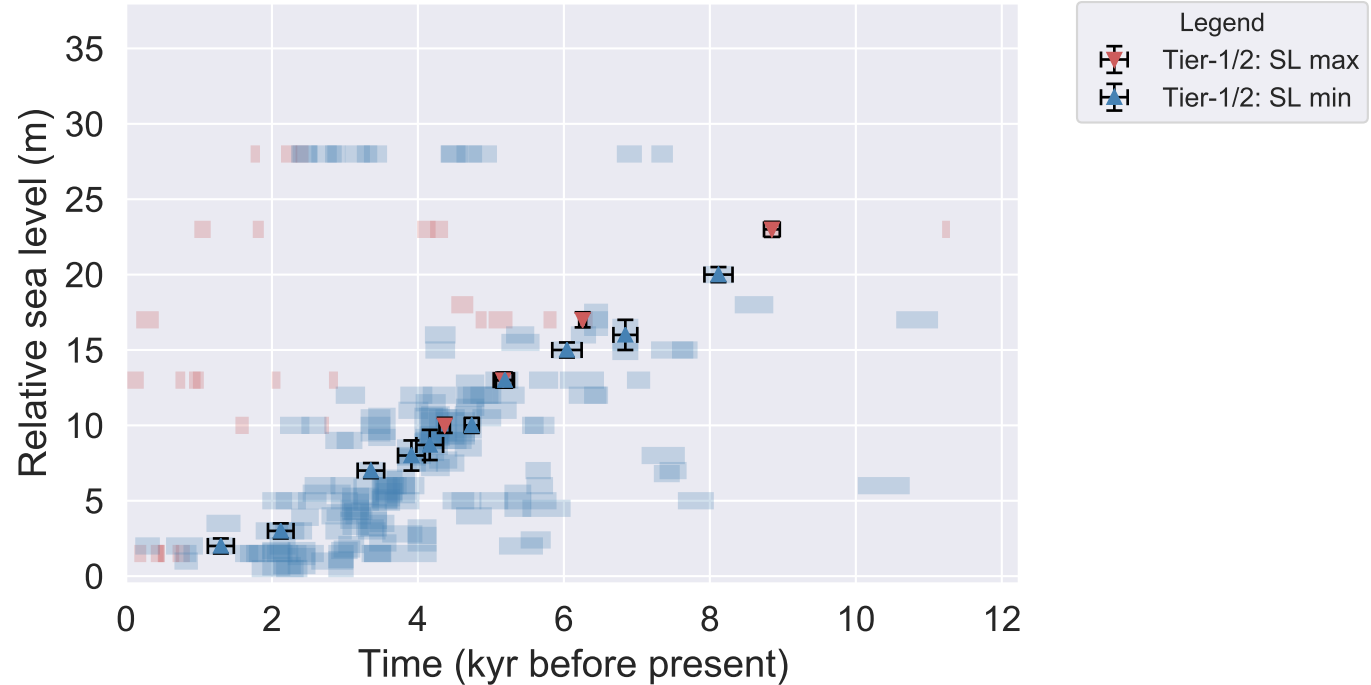

Past relative sea level at site: 9201 (Verleyen et al., 2005)

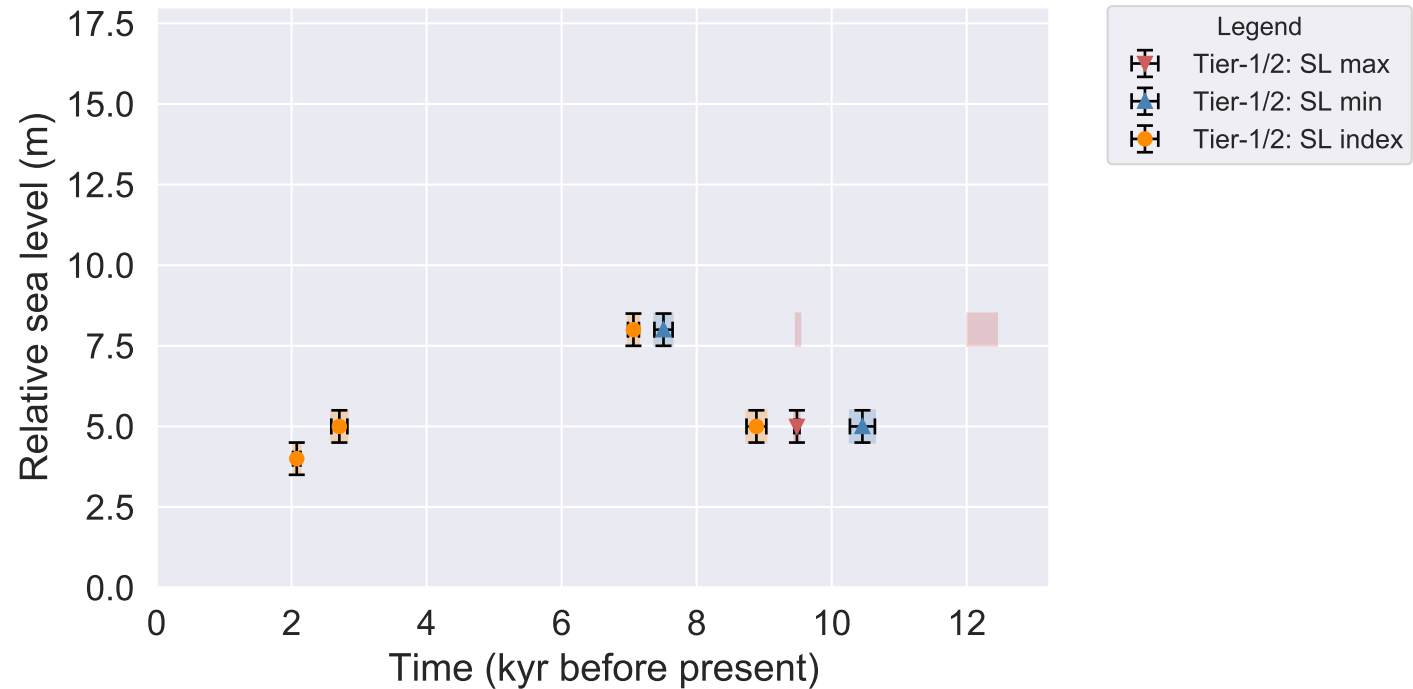

Past relative sea level at site: 9202 (Zwartz et al., 1998; Berg et al., 2010; Hodgson et al., 2016)

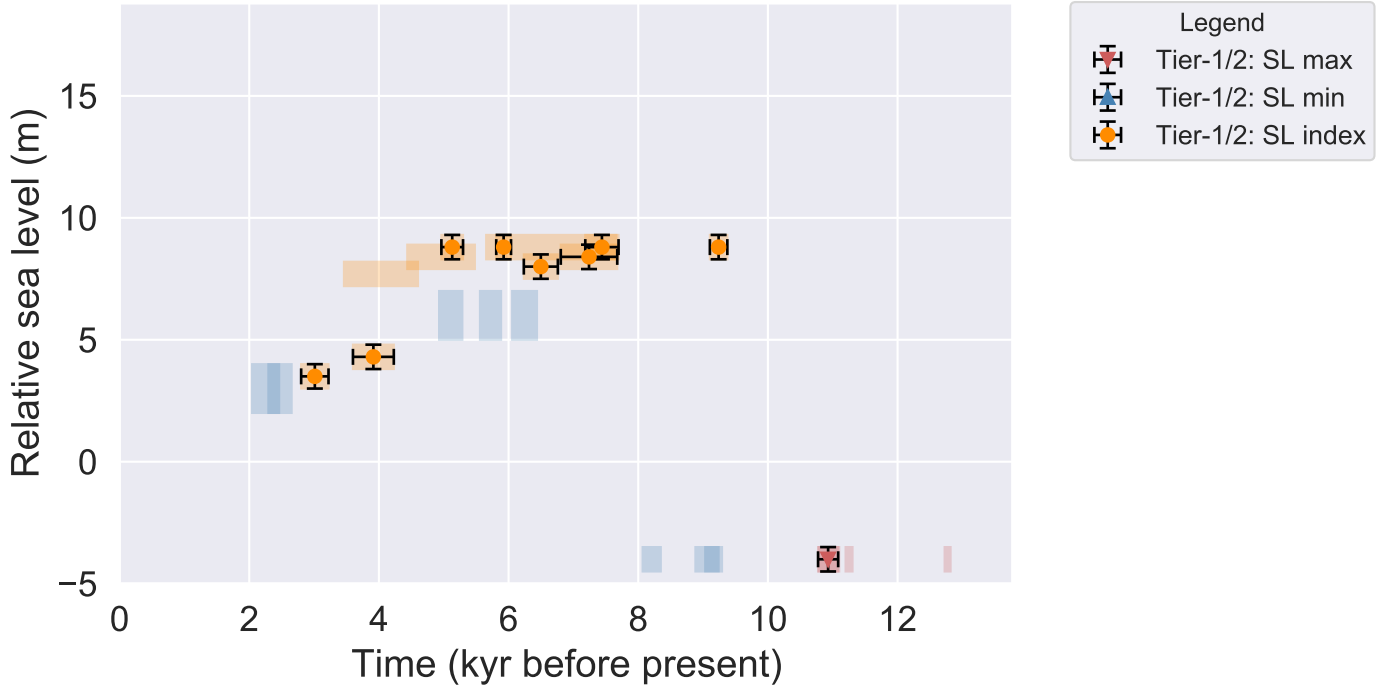

Past relative sea level at site: 9301 (Goodwin et al., 2000)

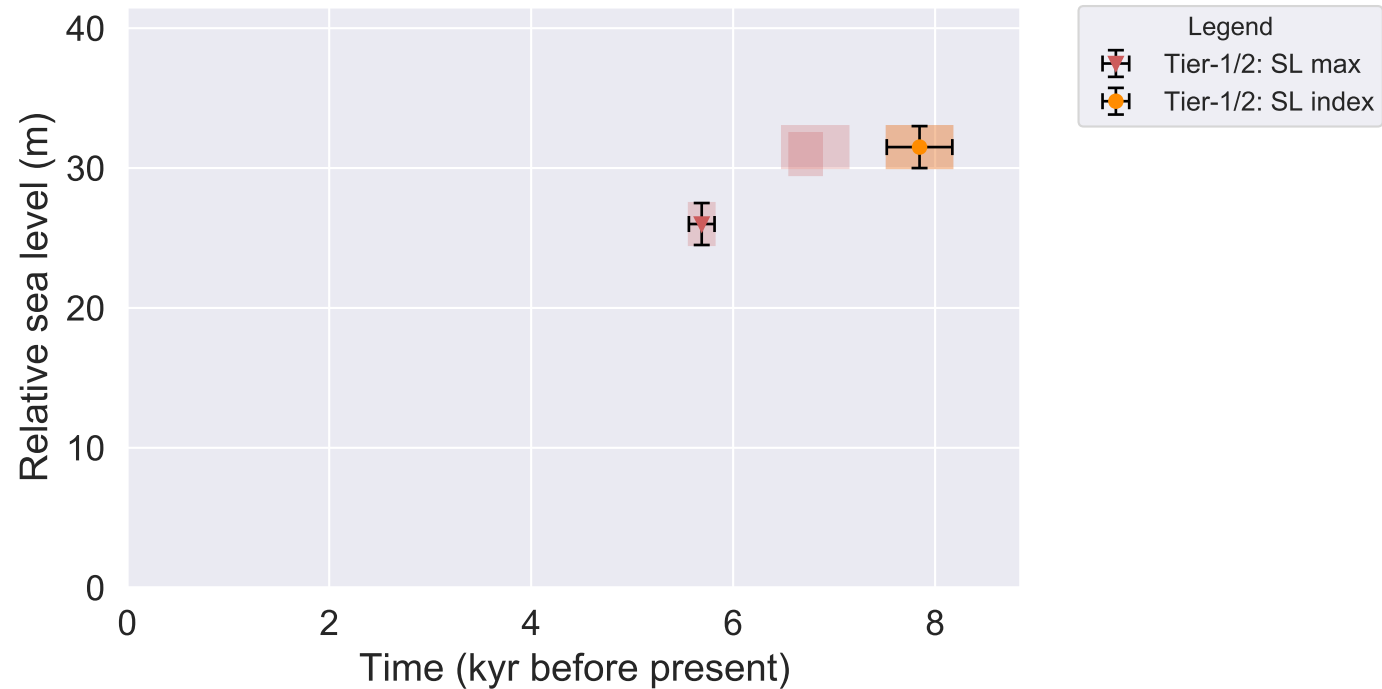

Past relative sea level at site: 9401 (Baroni et al., 2004)

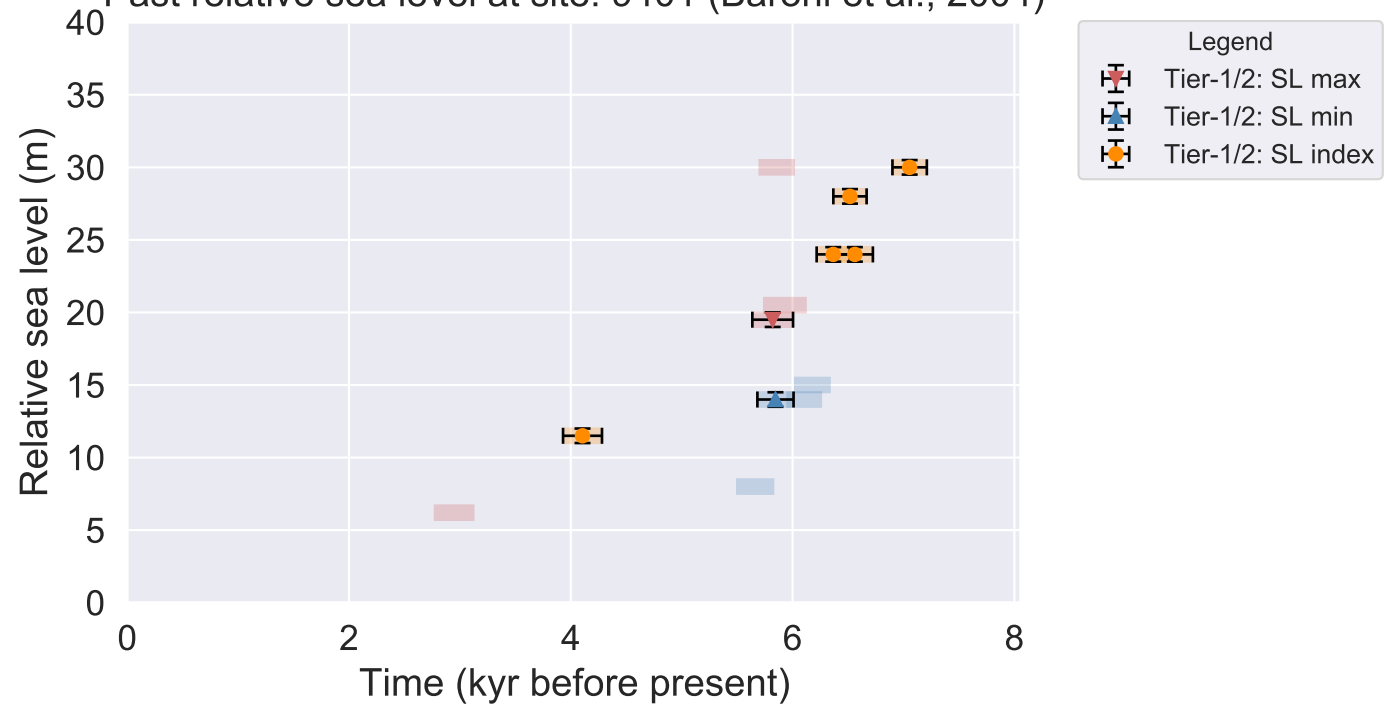

Past relative sea level at site: 9402 (Hall et al., 1999)

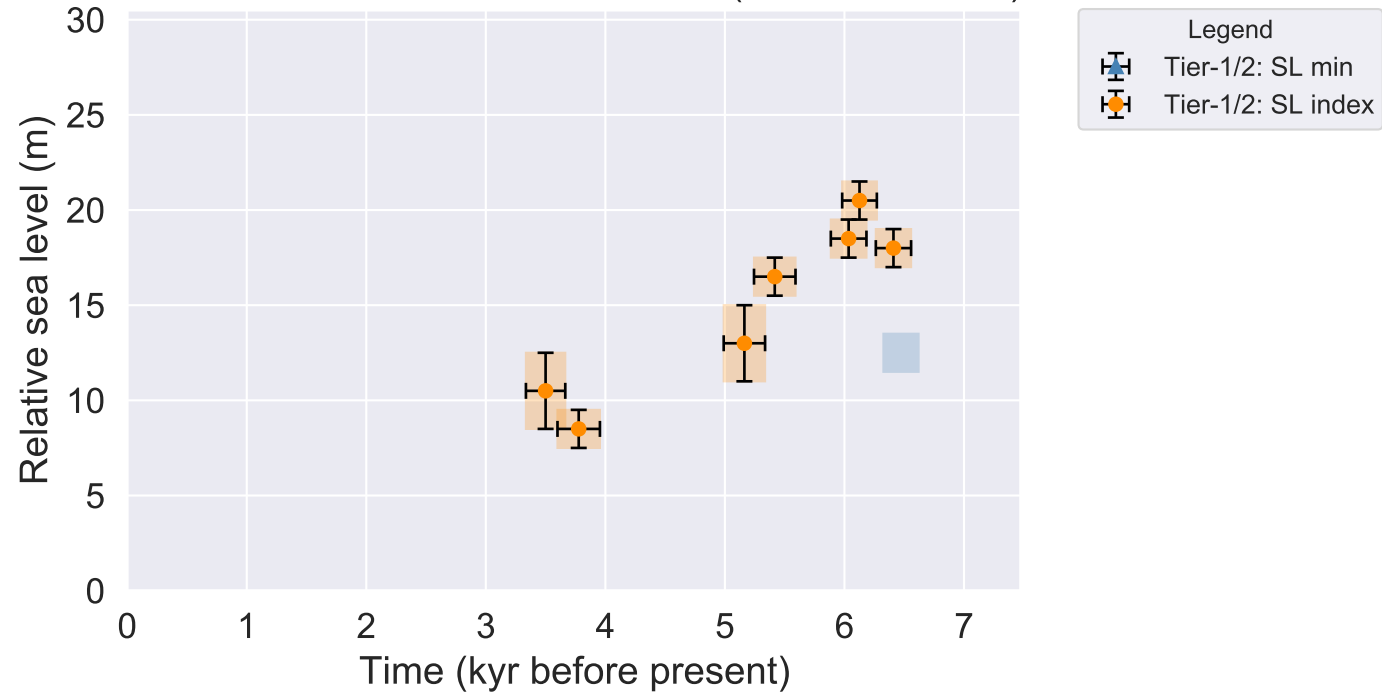

Past relative sea level at site: 9501 (Johnson et al., 2008)

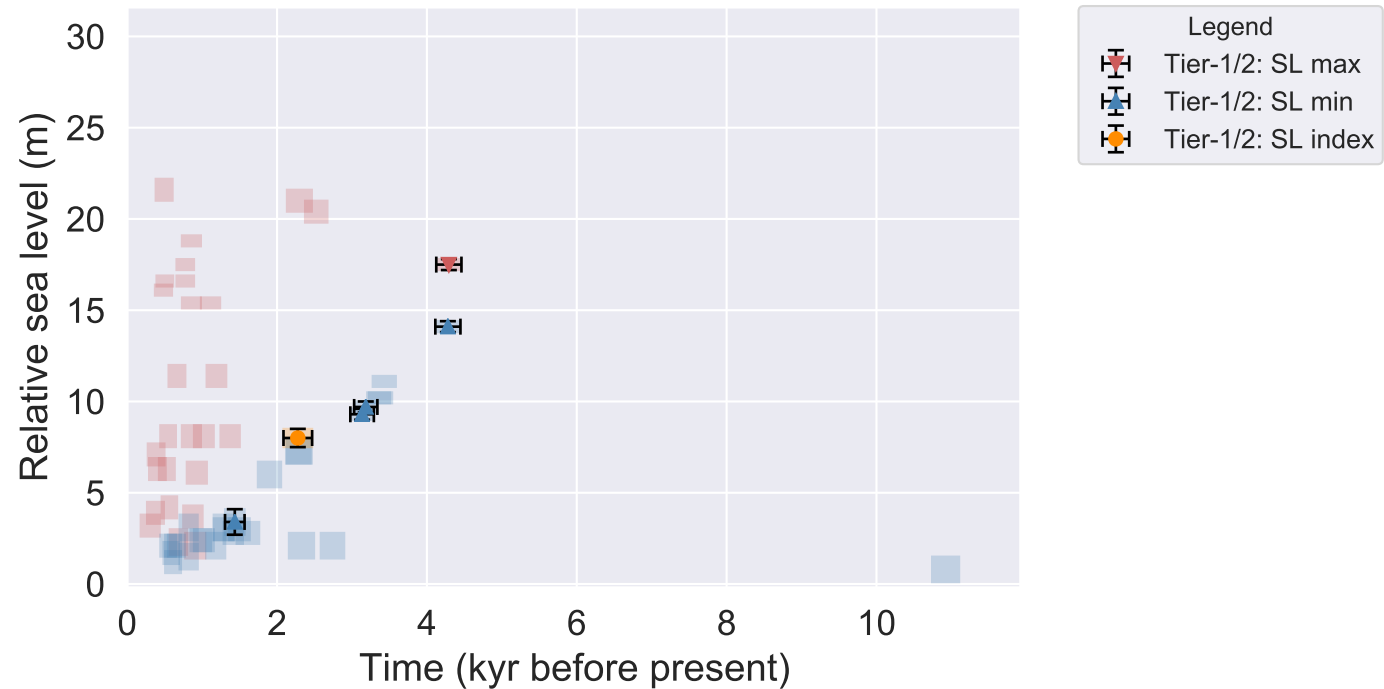

Past relative sea level at site: 9601 (Bentley et al., 2005; Emslie et al., 2002; Simkins et al., 2013)

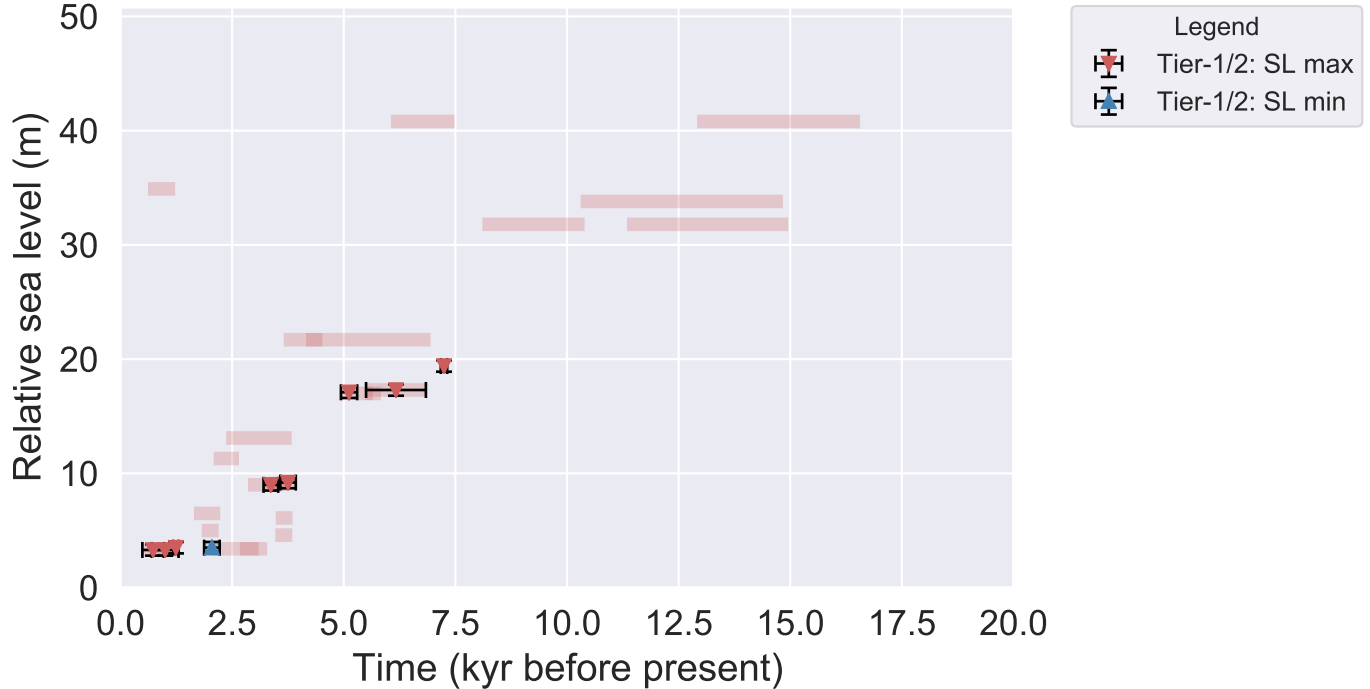

Past relative sea level at site: 9602 (Simkins et al., 2015)

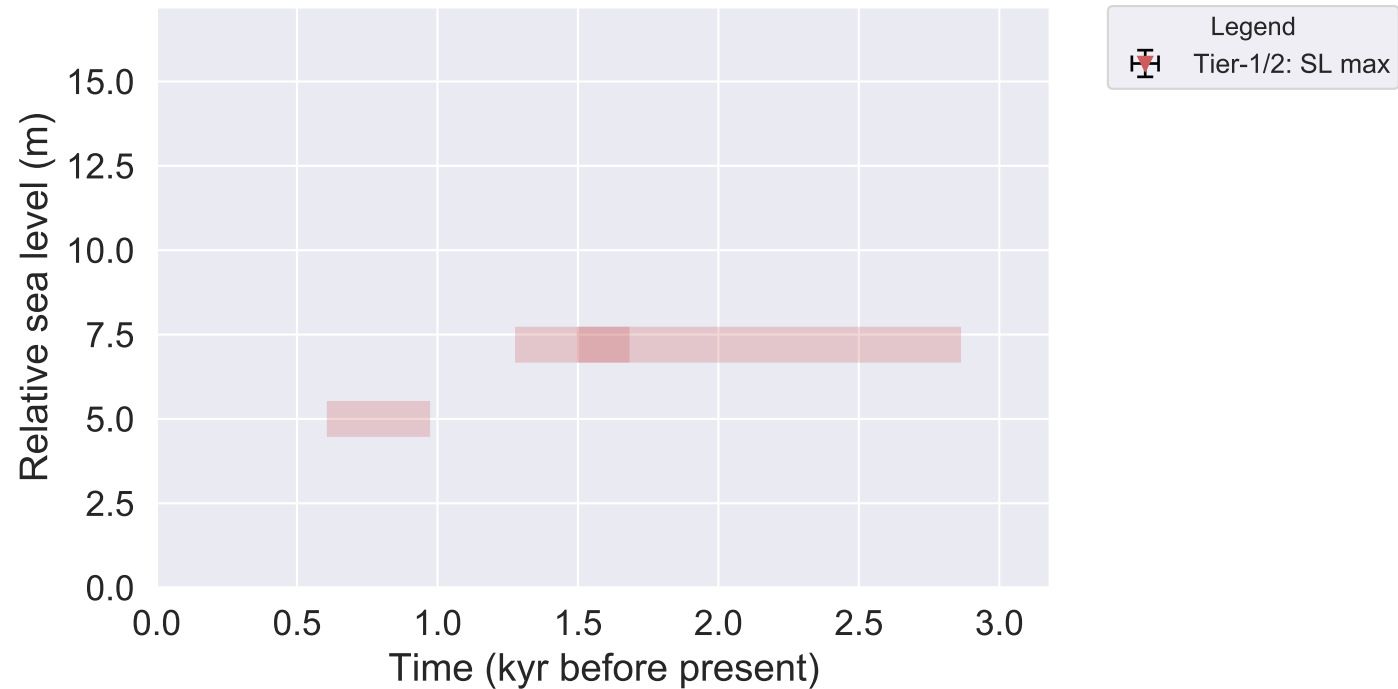

Past relative sea level at site: 9603 (Hall et al., 2010)

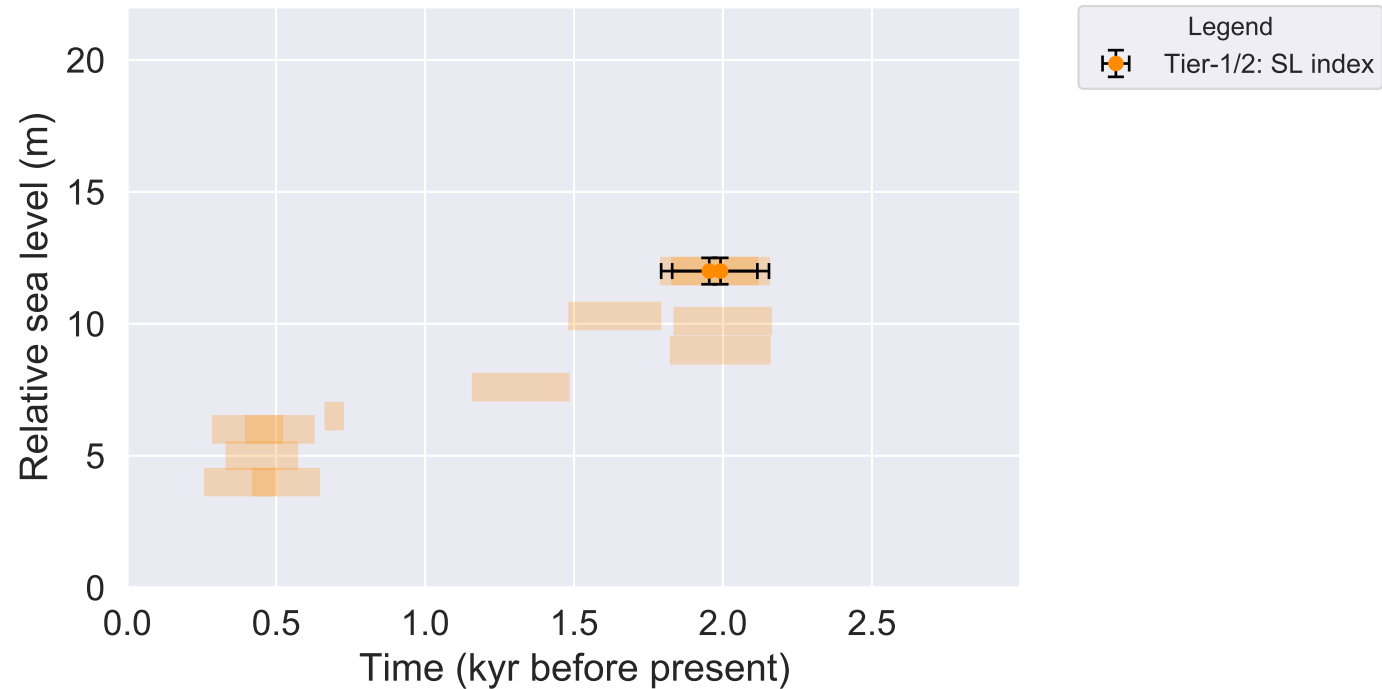

Past relative sea level at site: 9604 (Bentley et al., 2005; Simms et al., 2011; Hall et al., 2010)

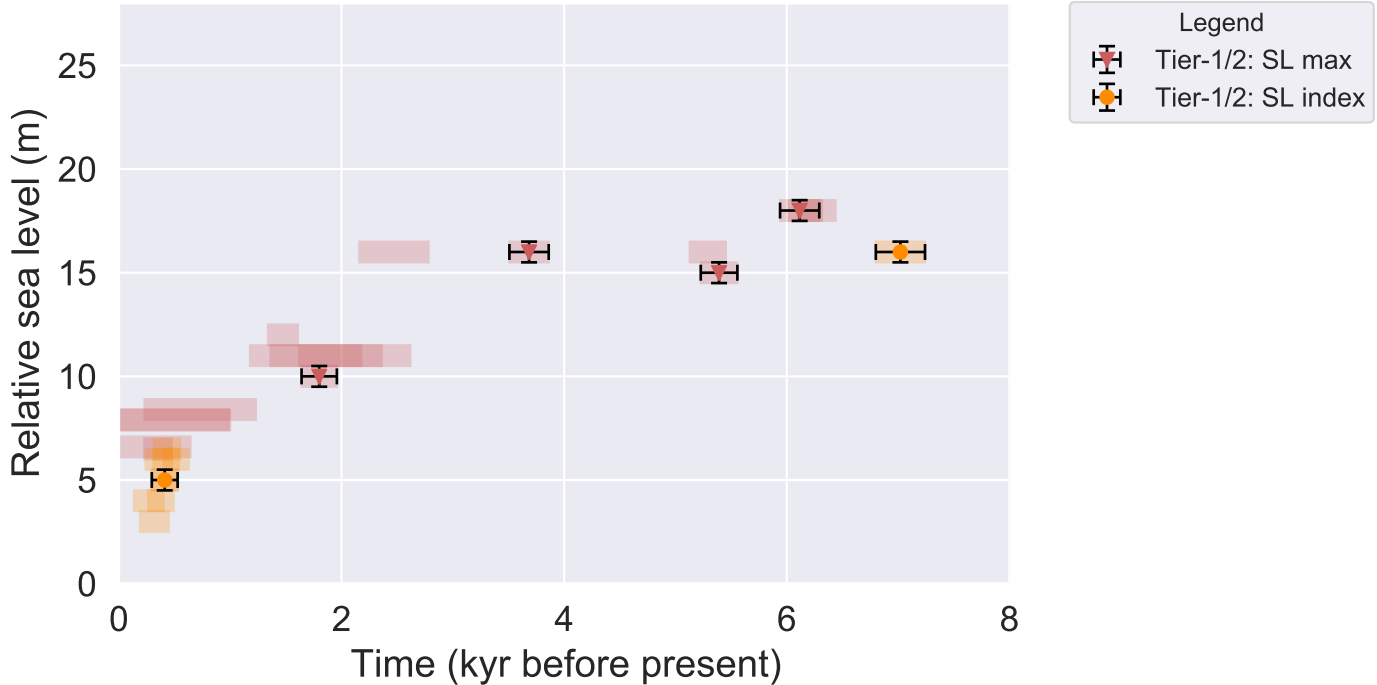

Past relative sea level at site: 9605 (Zurbuchen et al., 2019)

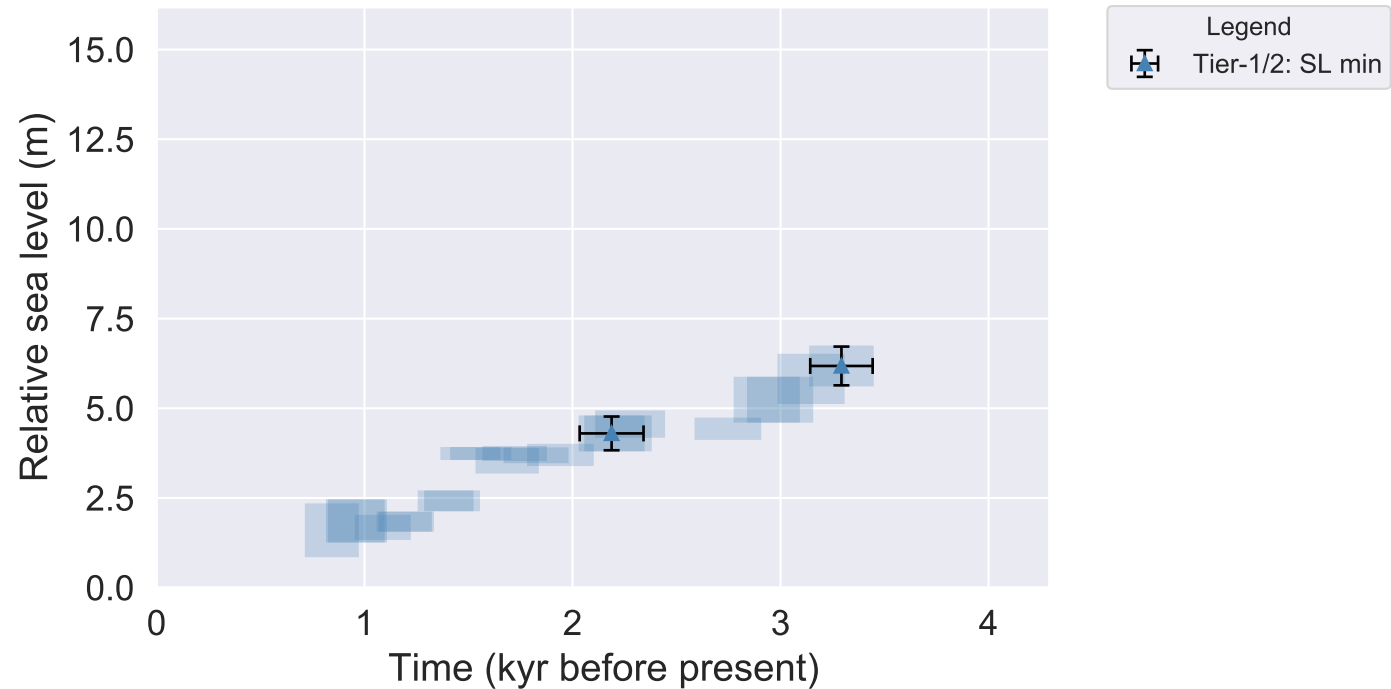

Supplement: Supplementary file 6 [file essd-15-3573-2023-supplement.zip]
