# Supplementary material for: Antarctic Ice Sheet paleo-constraint database
Source: Copernicus journal article supplement (doi:10.5194/essd-15-3573-2023), 2023-08-10

# Exposure ages at site: 1101 (Andersen et al., 2020)

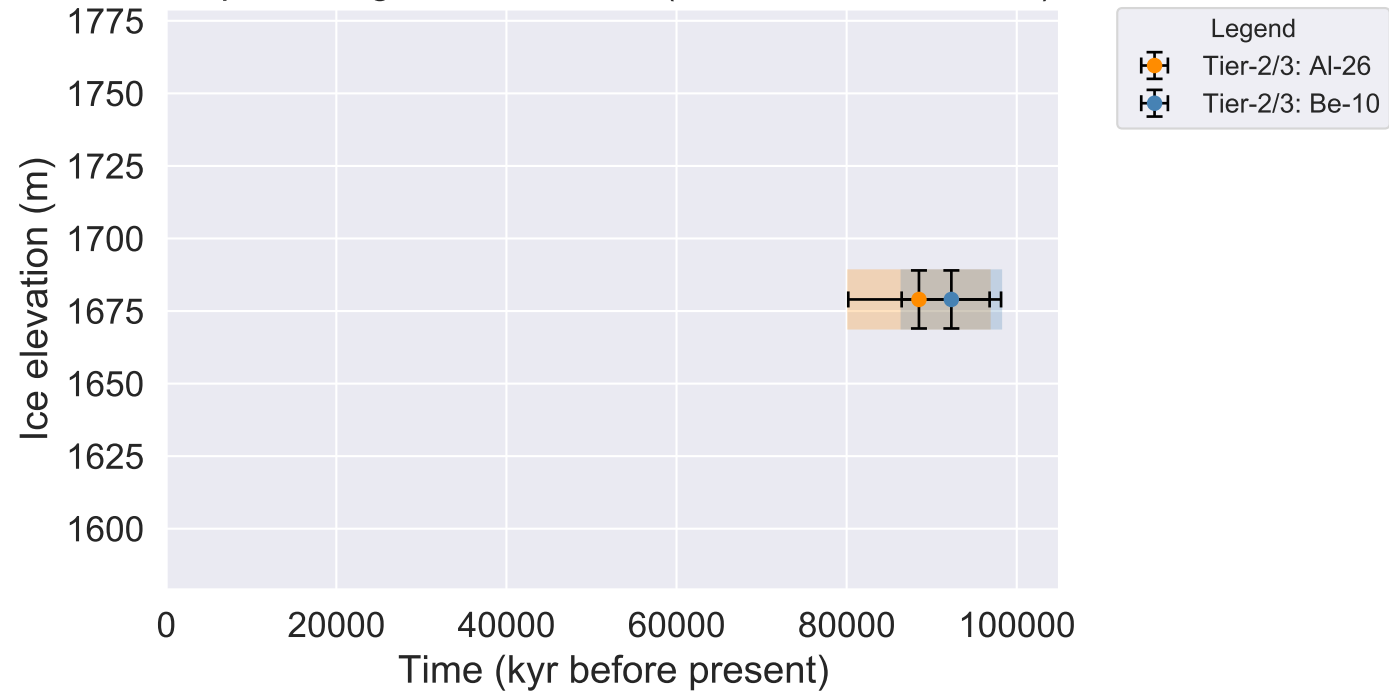

# Exposure ages at site: 1102 (Andersen et al., 2020)

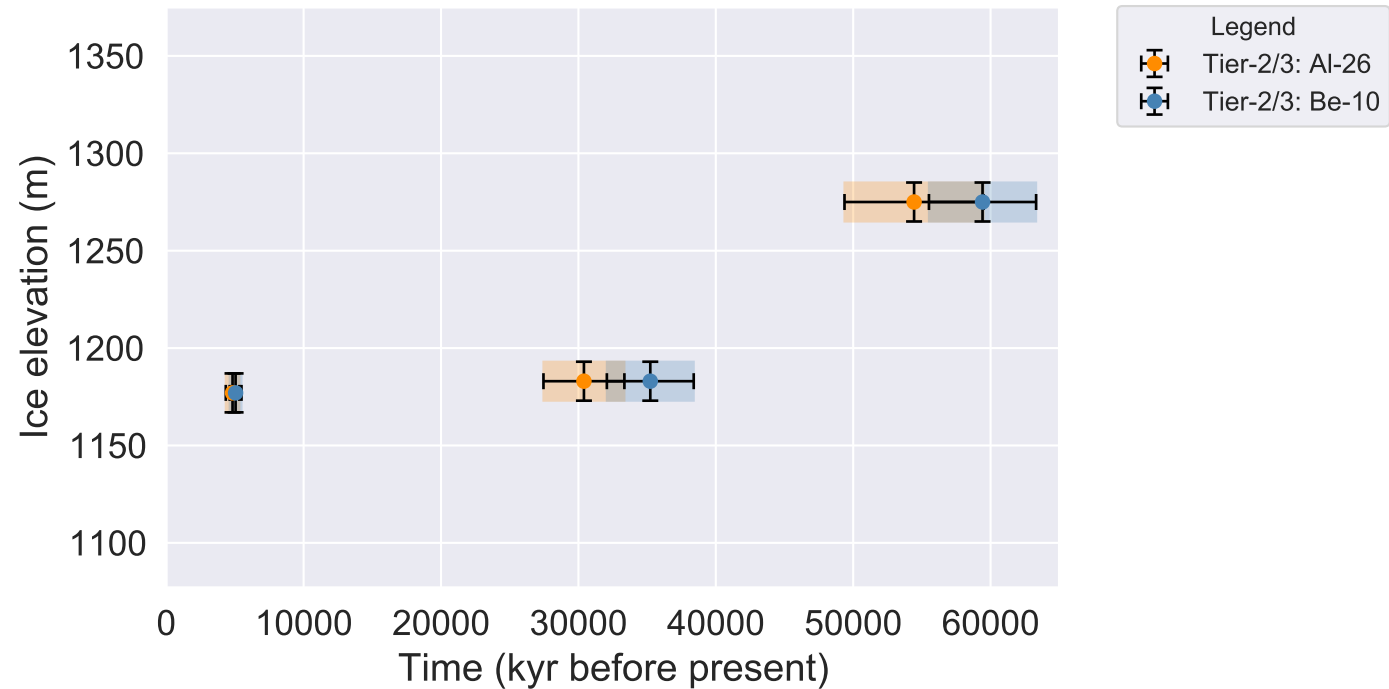

# Exposure ages at site: 1103 (Andersen et al., 2020)

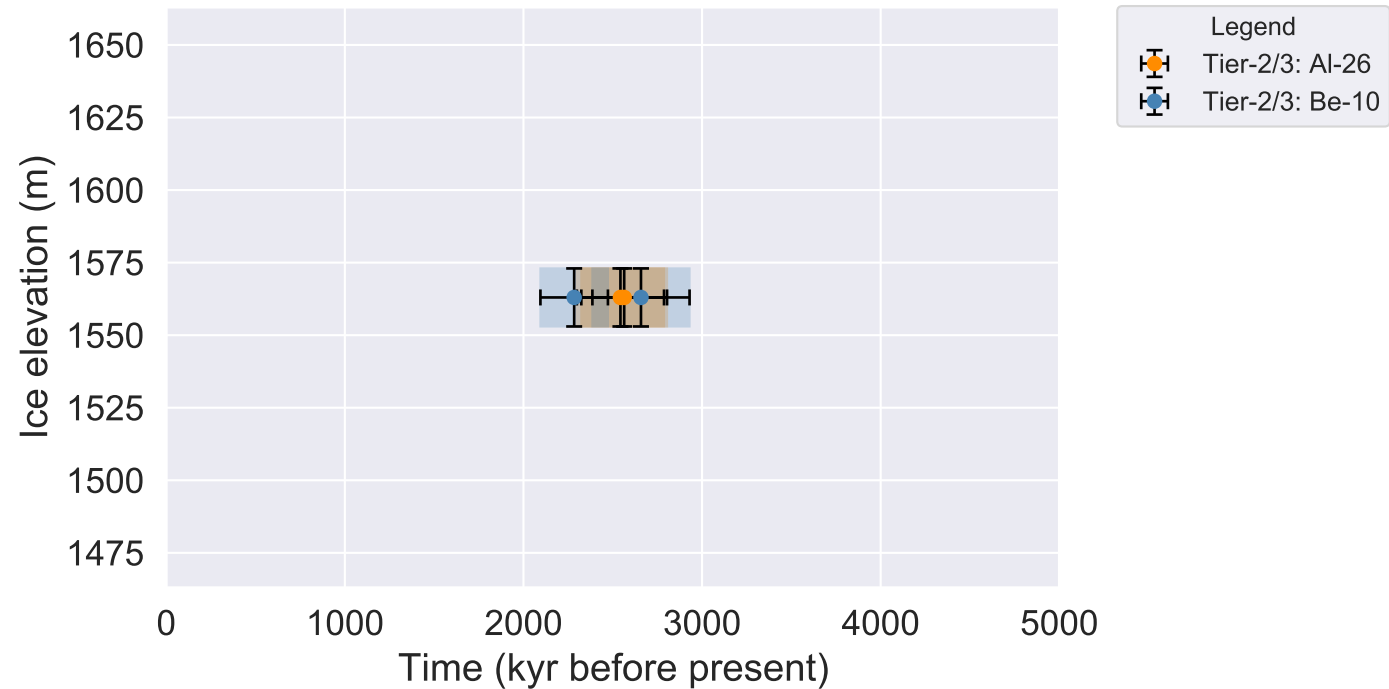

Exposure ages at site: 1104 (Suganuma et al., 2014)

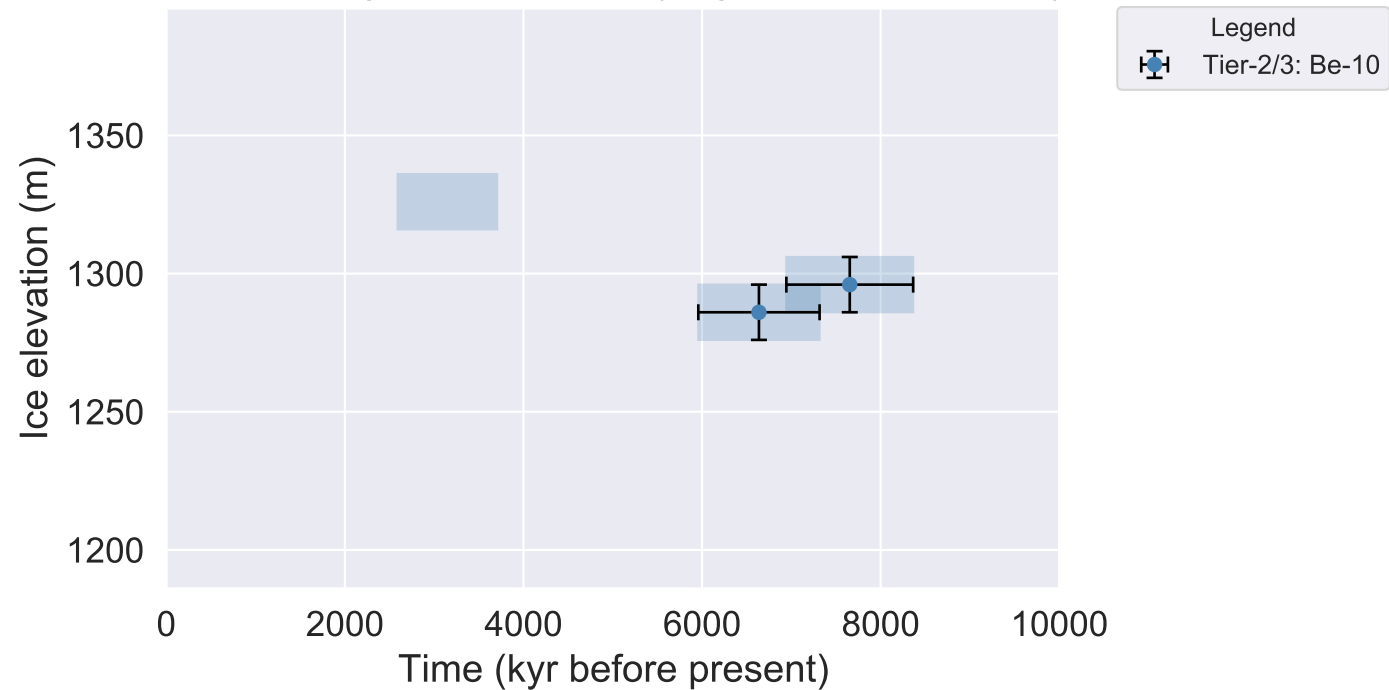

Exposure ages at site: 1105 (Kawamata et al., 2020)

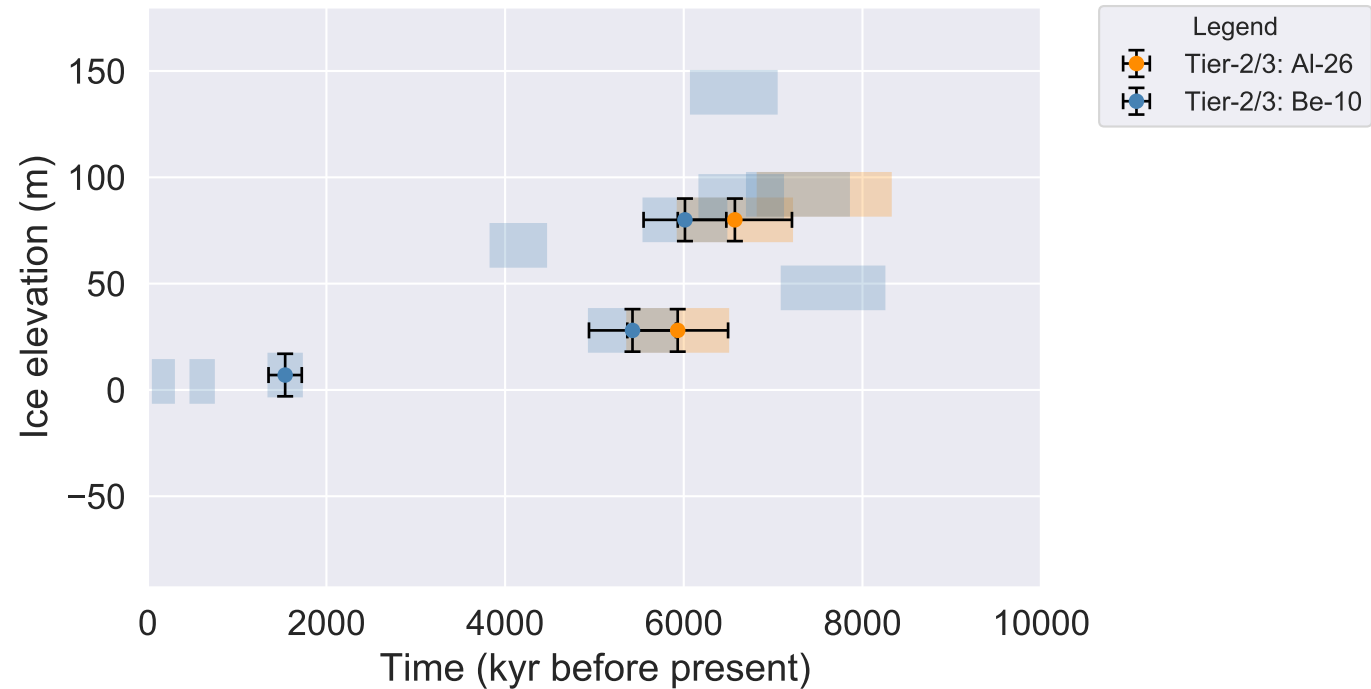

Exposure ages at site: 1106 (Kawamata et al., 2020)

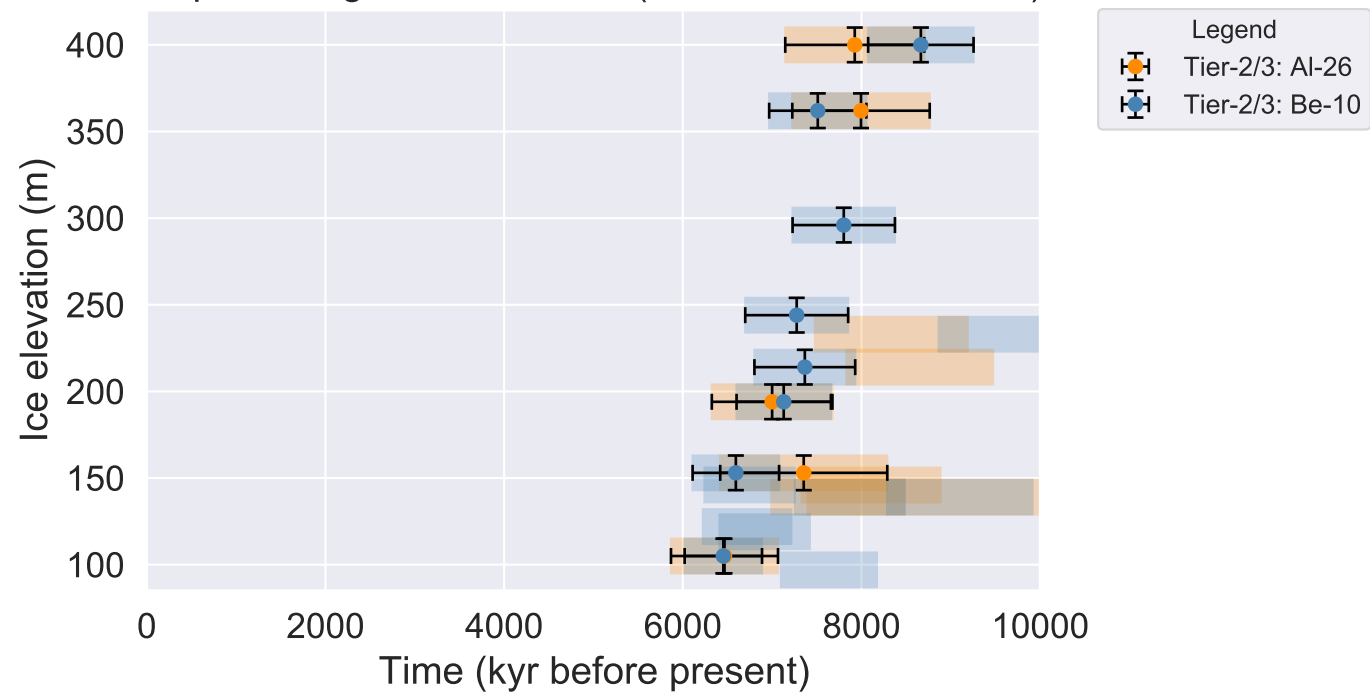

# Exposure ages at site: 1107 (Yamane et al., 2011)

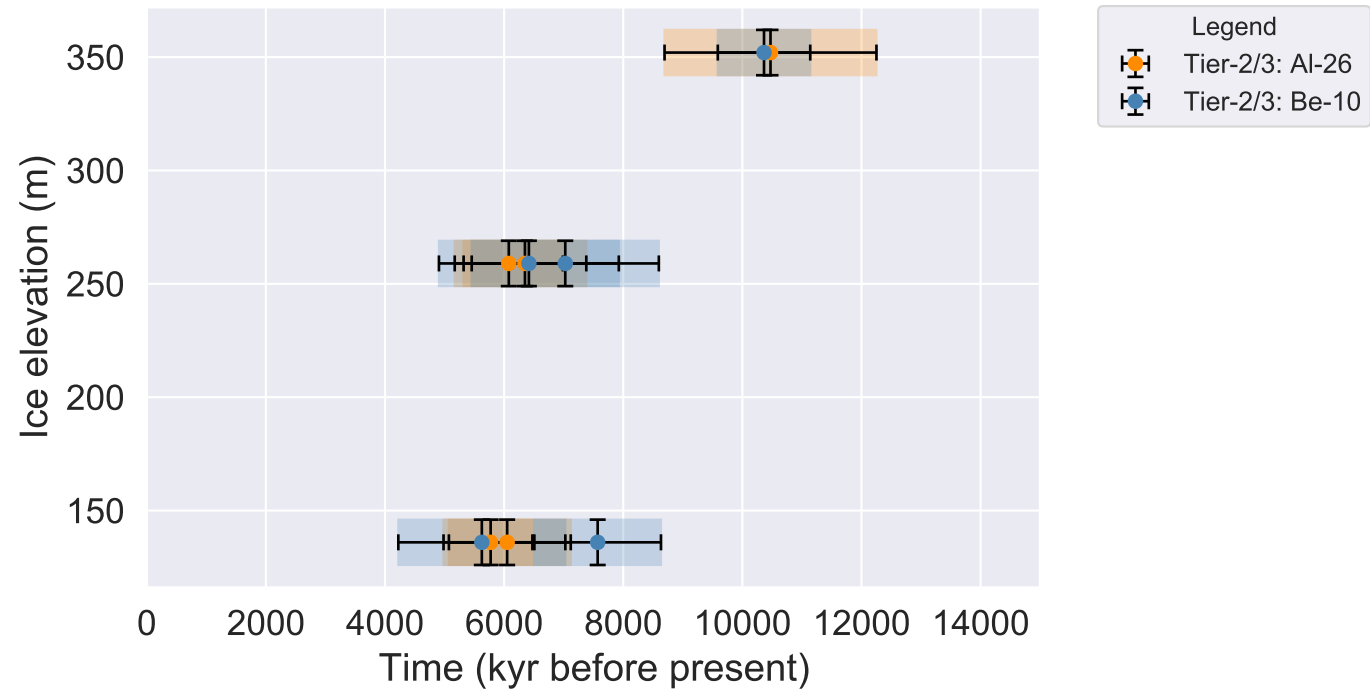

# Exposure ages at site: 1108 (White et al., 2014)

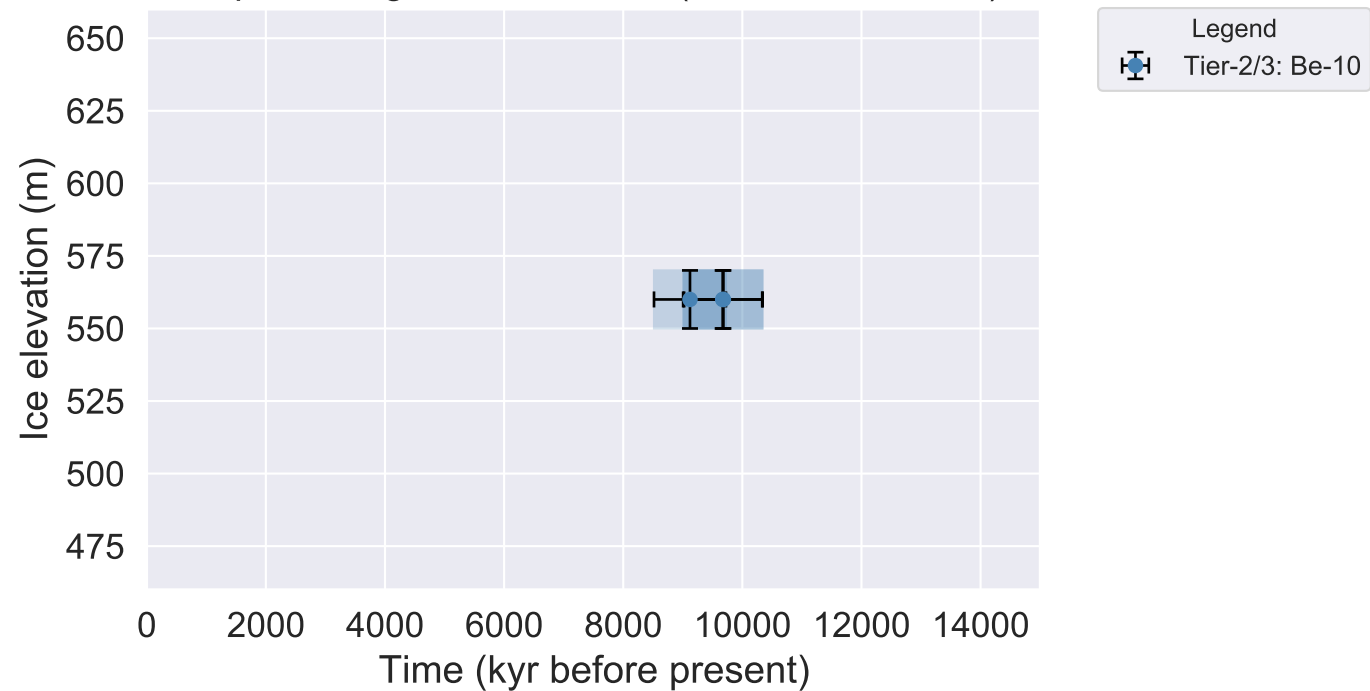

# Exposure ages at site: 1201 (Mackintosh et al., 2007)

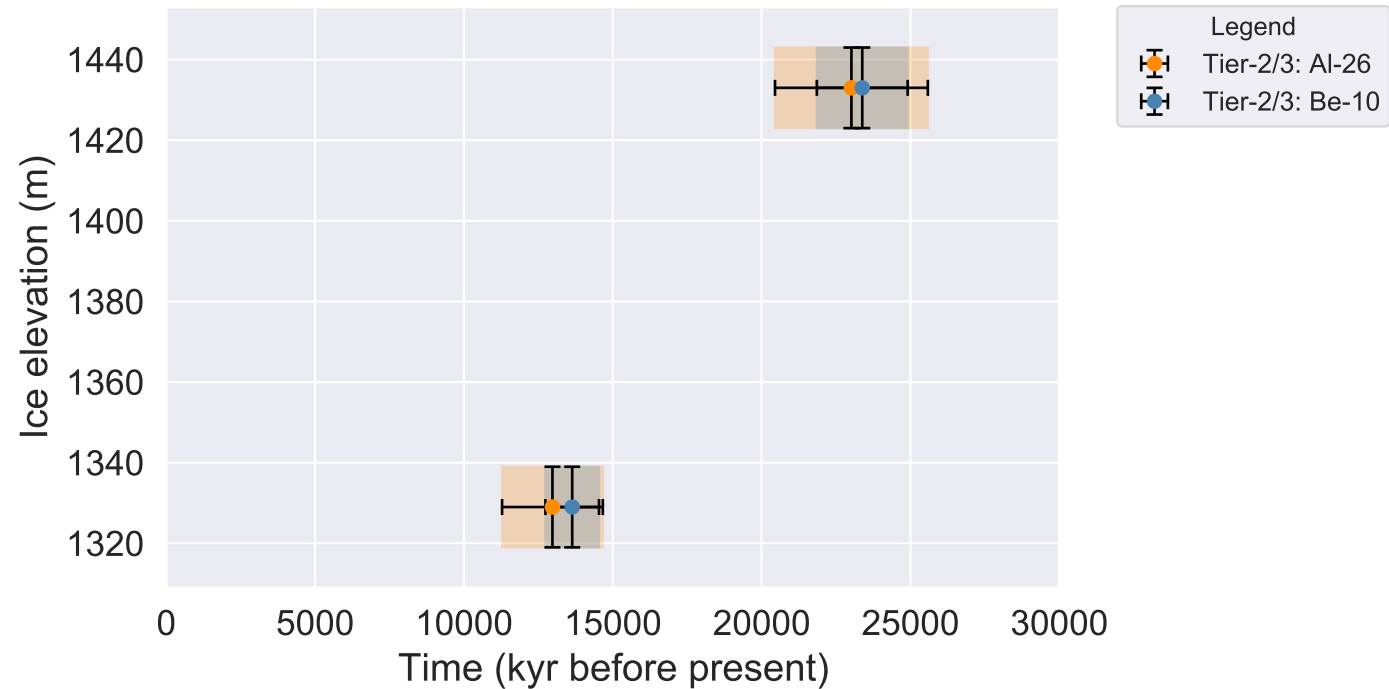

Exposure ages at site: 1202 (Mackintosh et al., 2007)

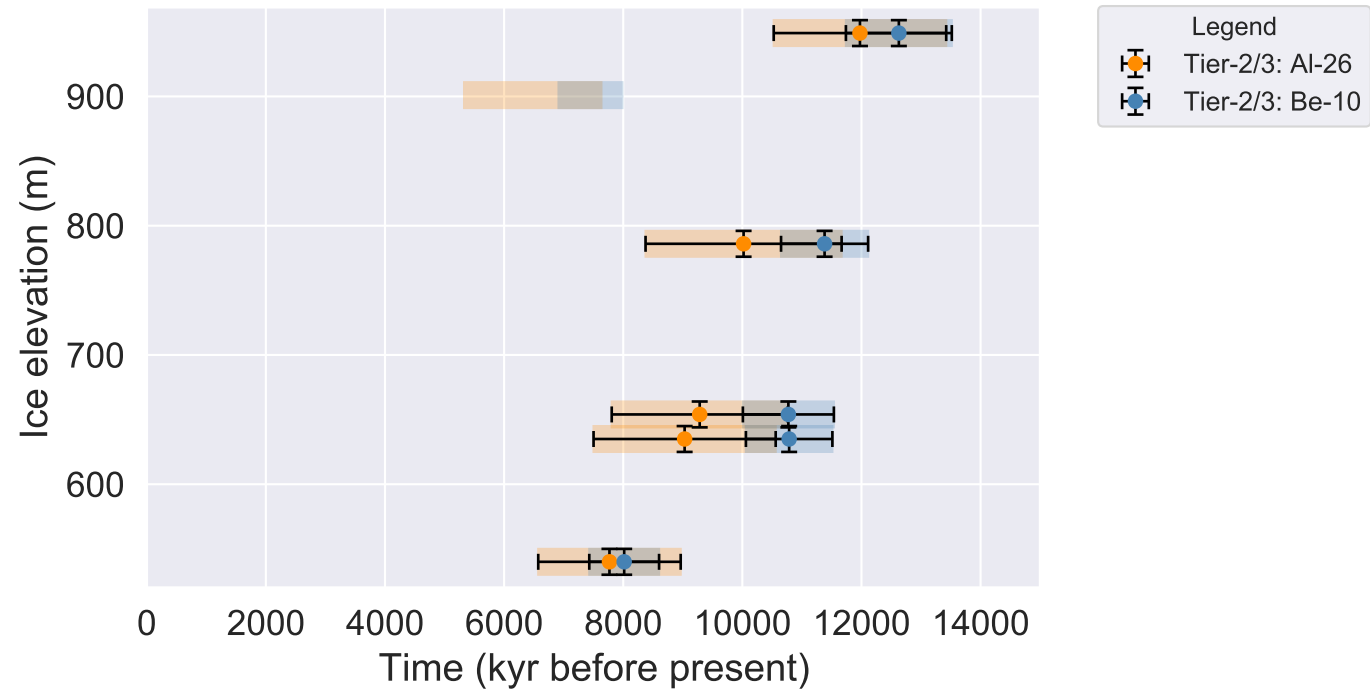

Exposure ages at site: 1203 (Mackintosh et al., 2007)

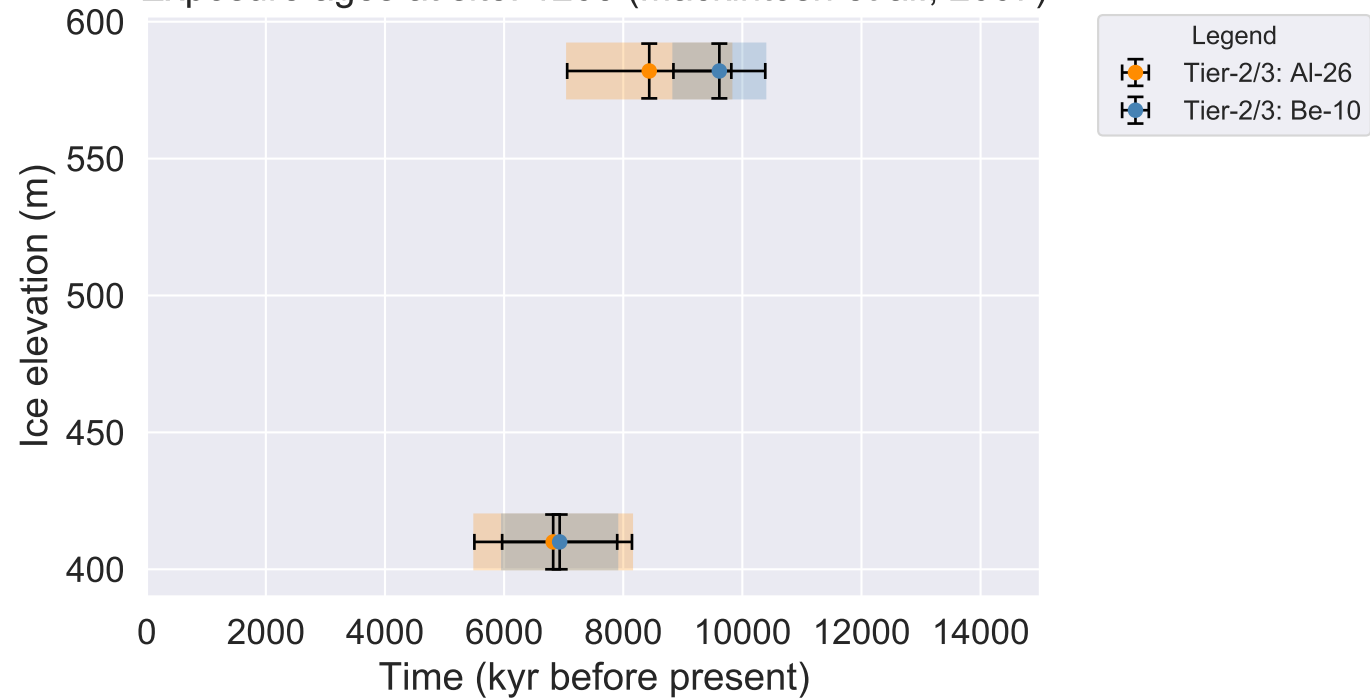

# Exposure ages at site: 1204 (White et al., 2011)

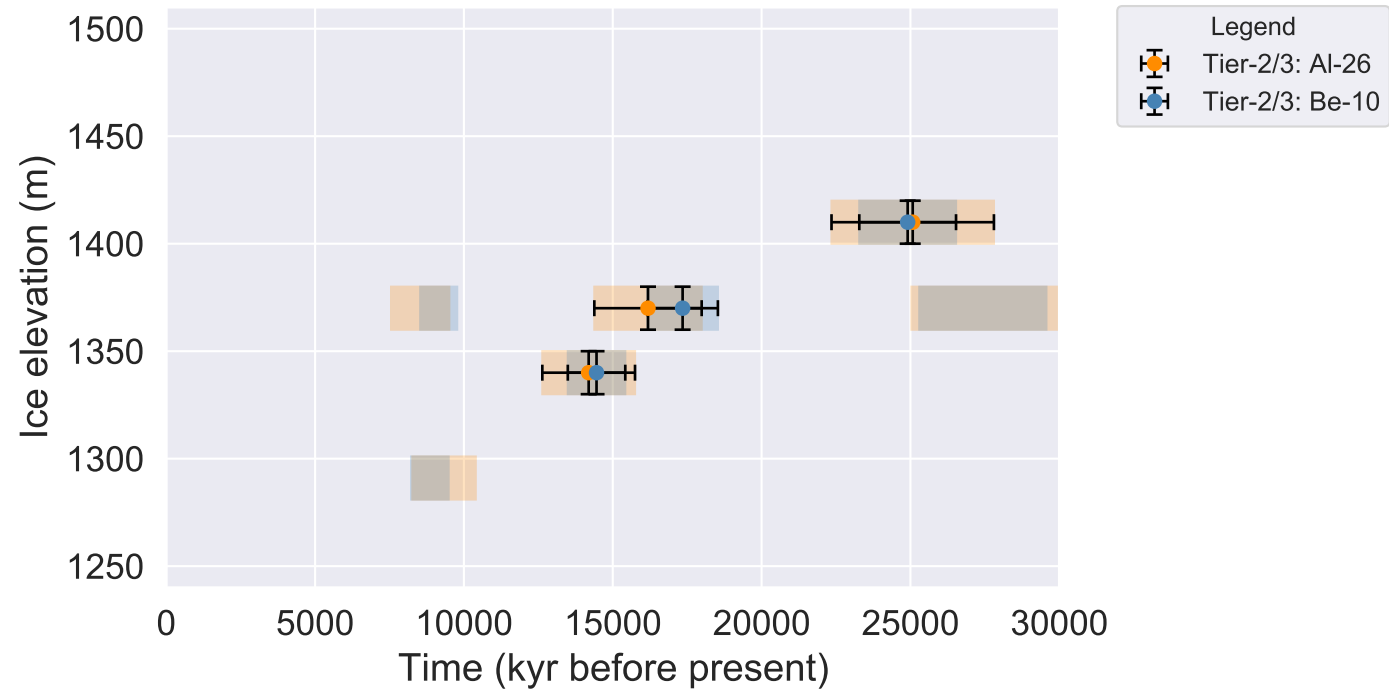

# Exposure ages at site: 1205 (White et al., 2011)

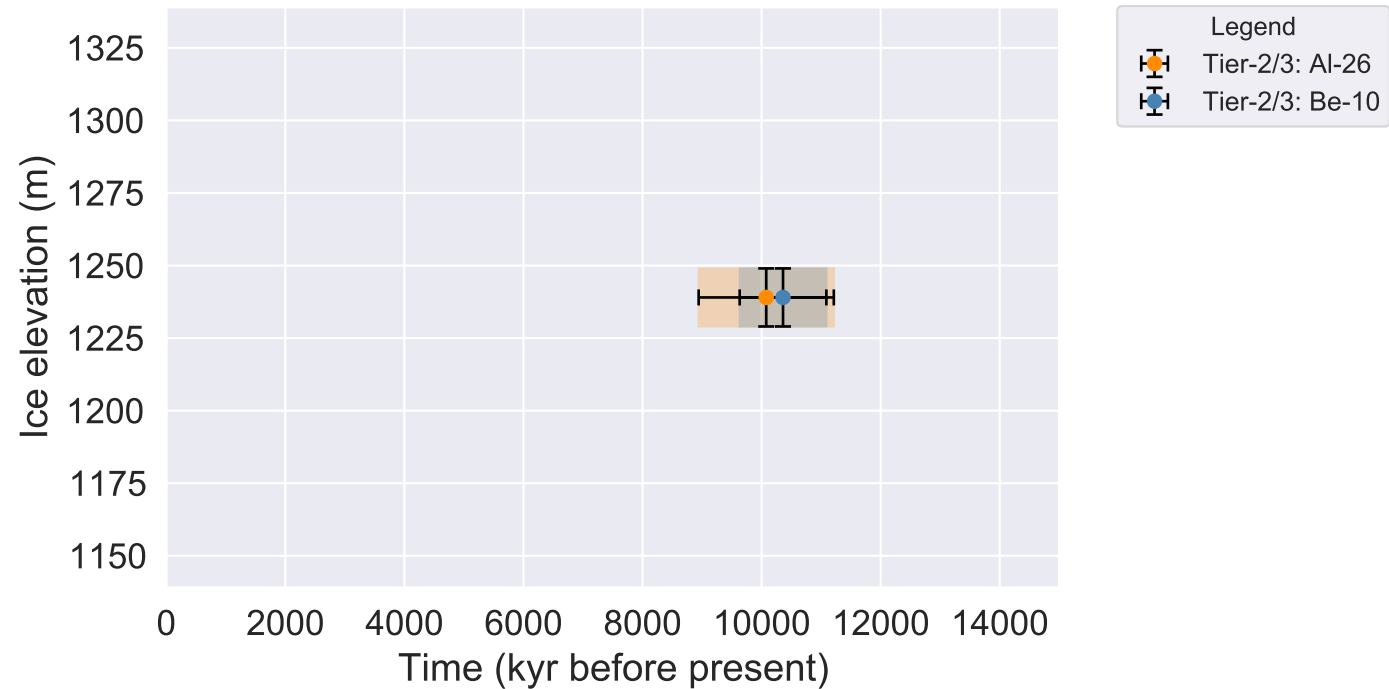

# Exposure ages at site: 1206 (White et al., 2011)

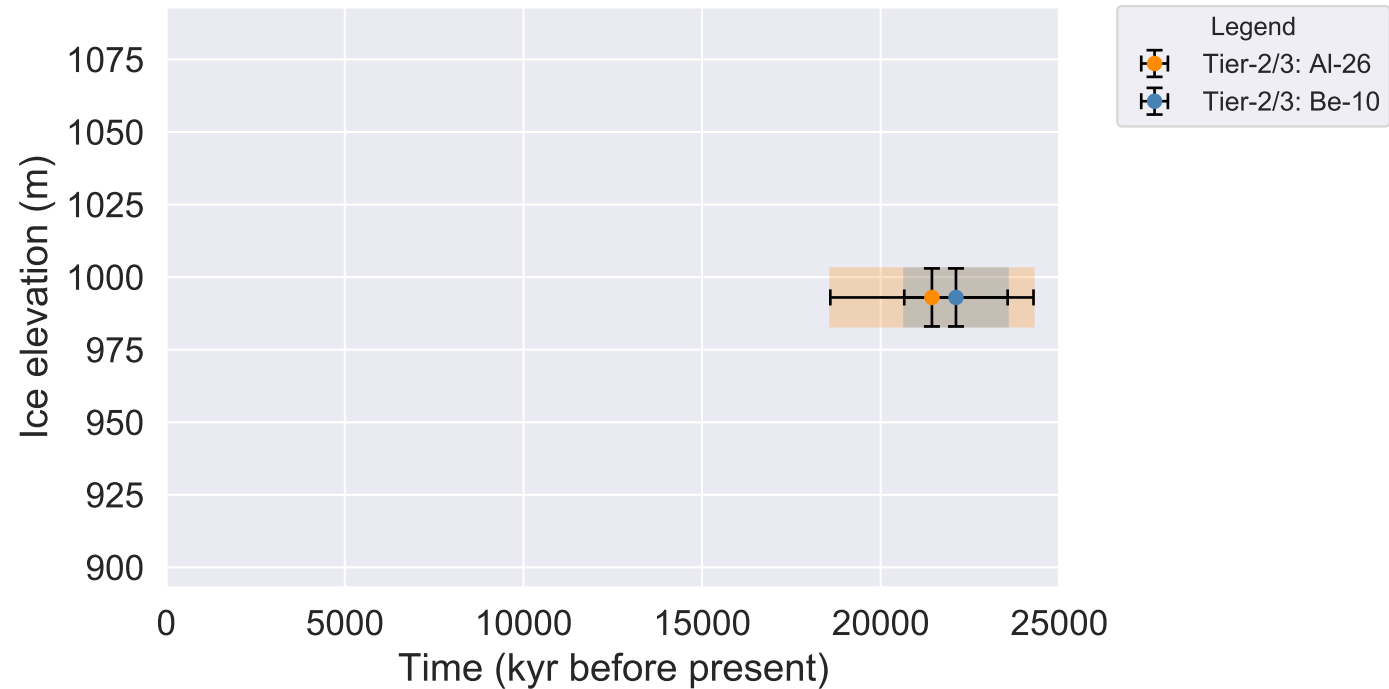

Exposure ages at site: 1207 (White et al., 2011)

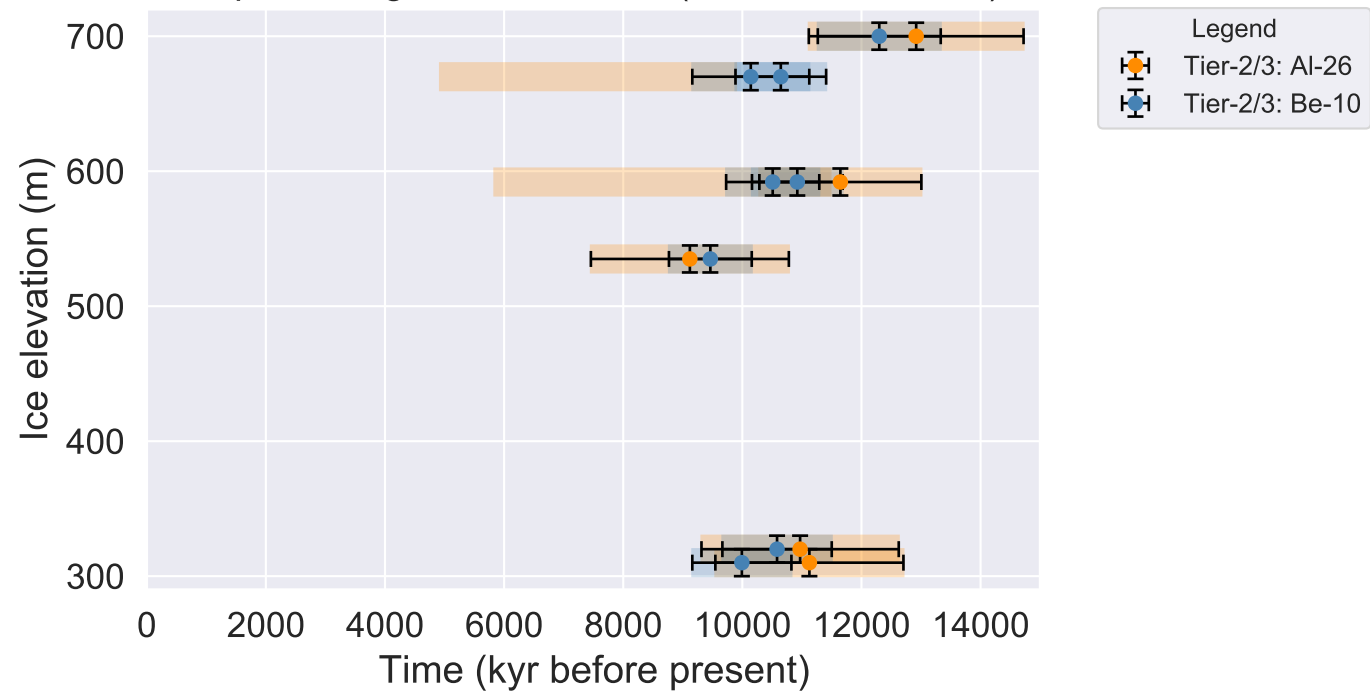

# Exposure ages at site: 1208 (White et al., 2011)



Exposure ages at site: 1209 (White et al., 2011)

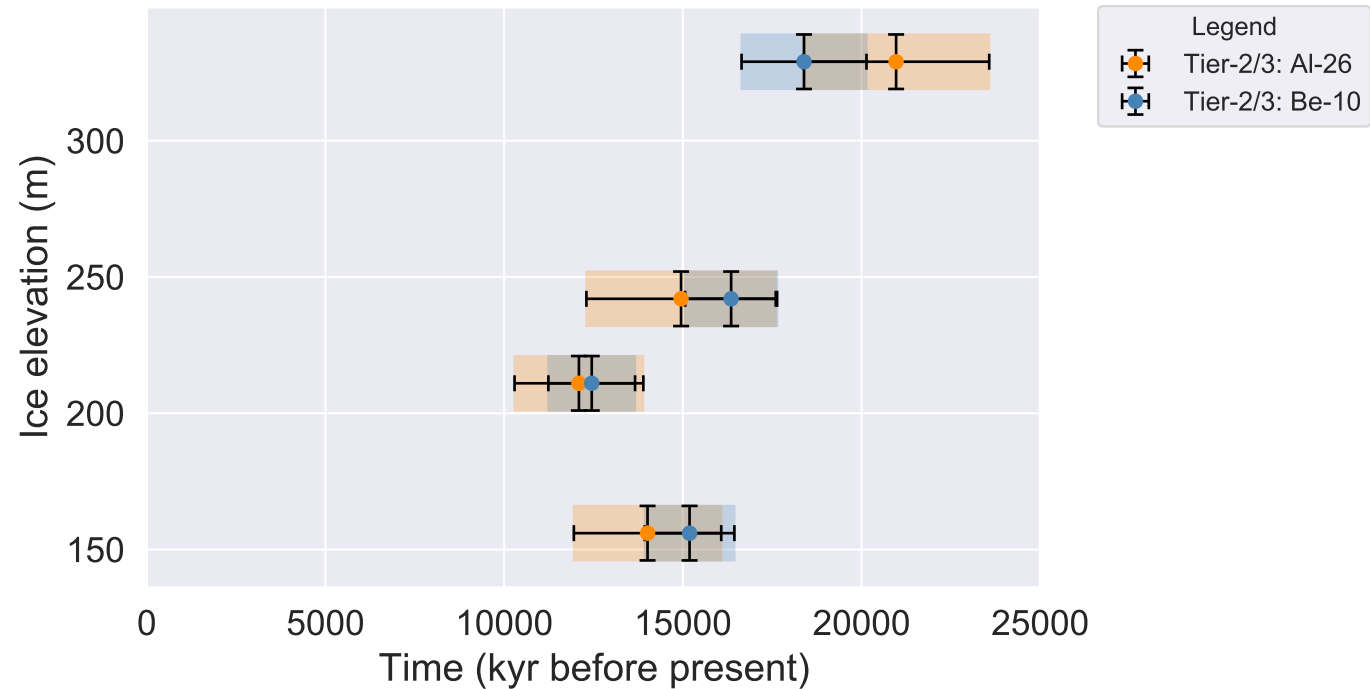

# Exposure ages at site: 1210 (Lilly et al., 2010)

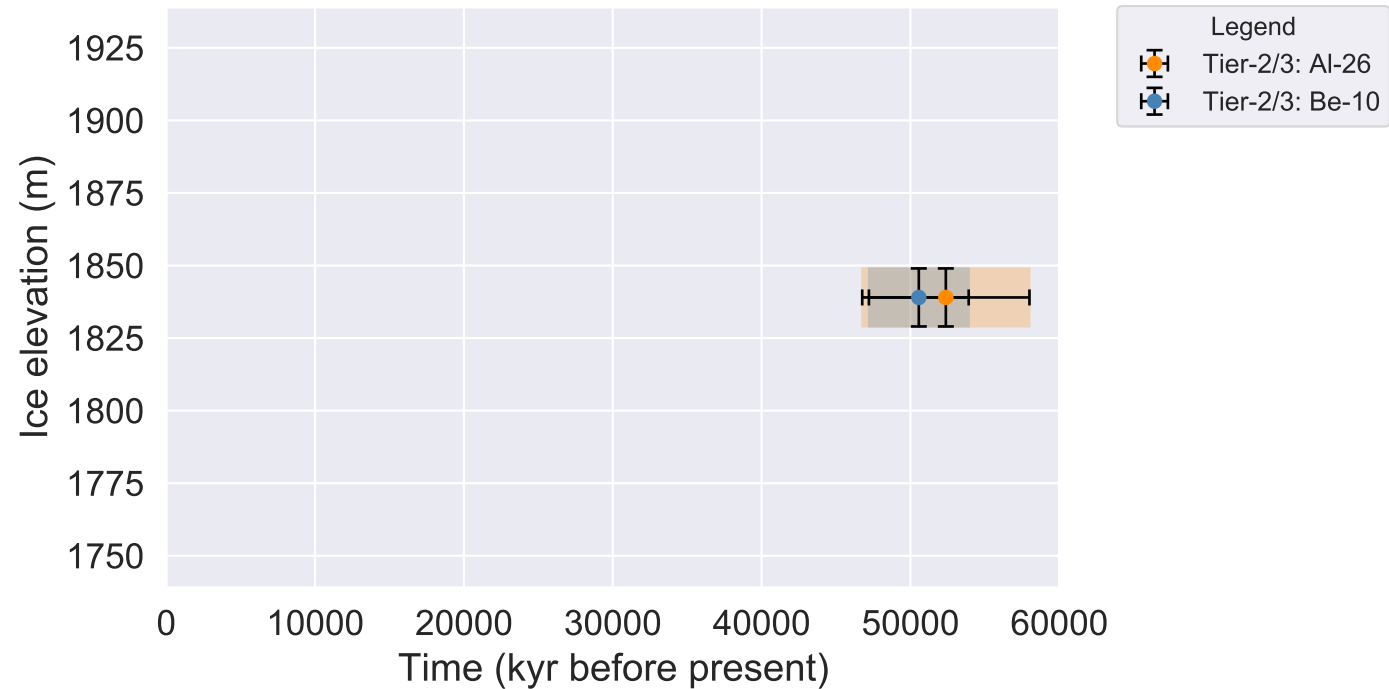

# Exposure ages at site: 1211 (Berg et al., 2016)

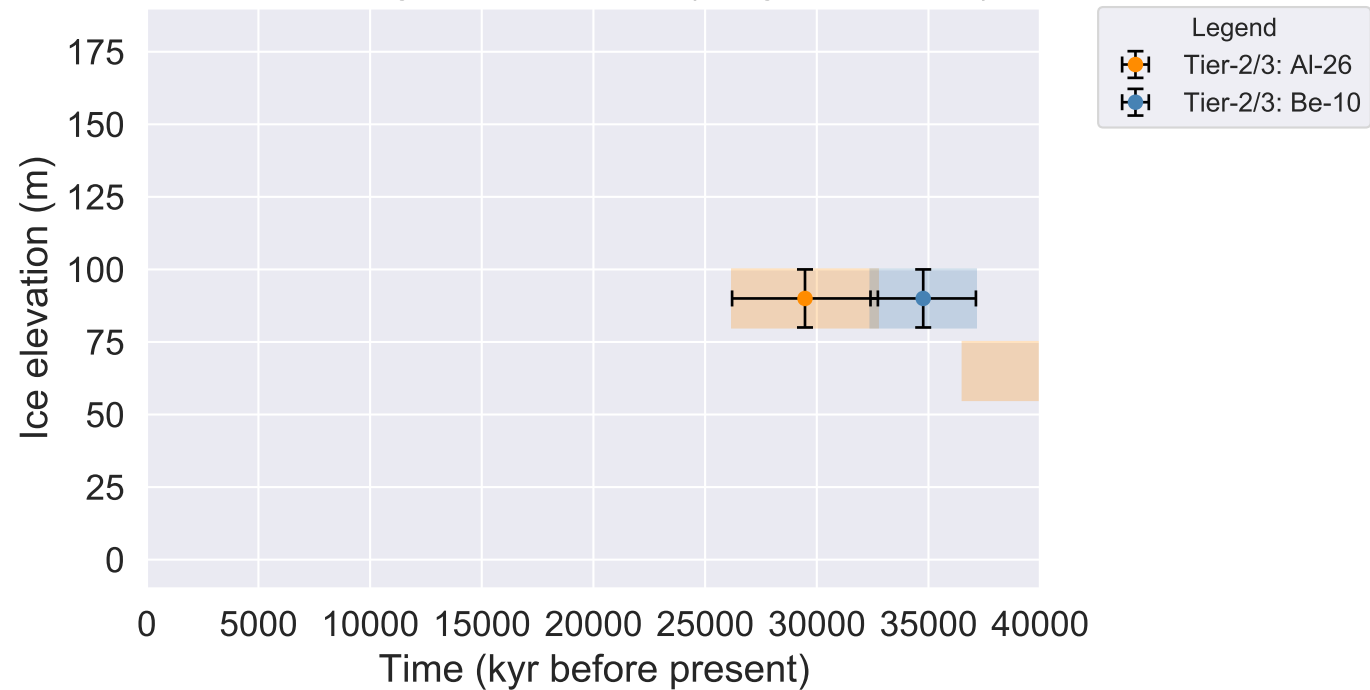

Exposure ages at site: 1301 (Voisine et al., 2020)

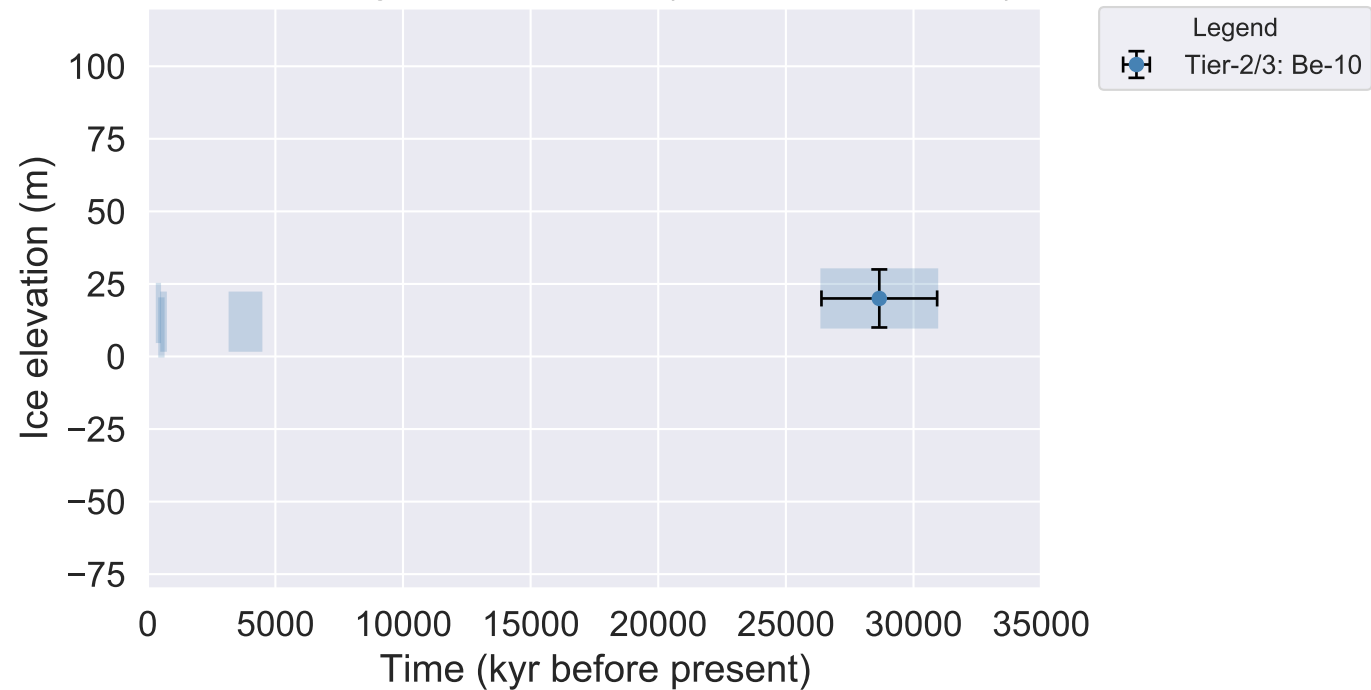

# Exposure ages at site: 1302 (Voisine et al., 2020)

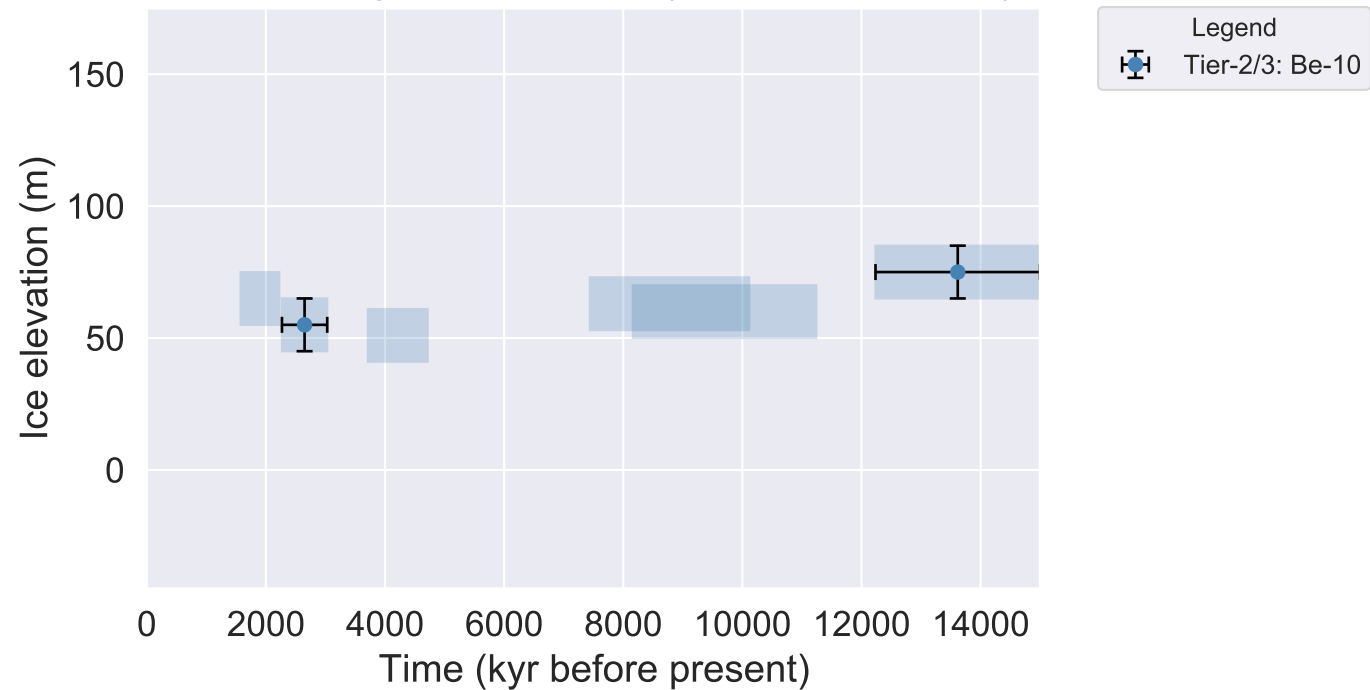

Exposure ages at site: 1303 (Balco et al., 2019; Goehring et al., 2019)

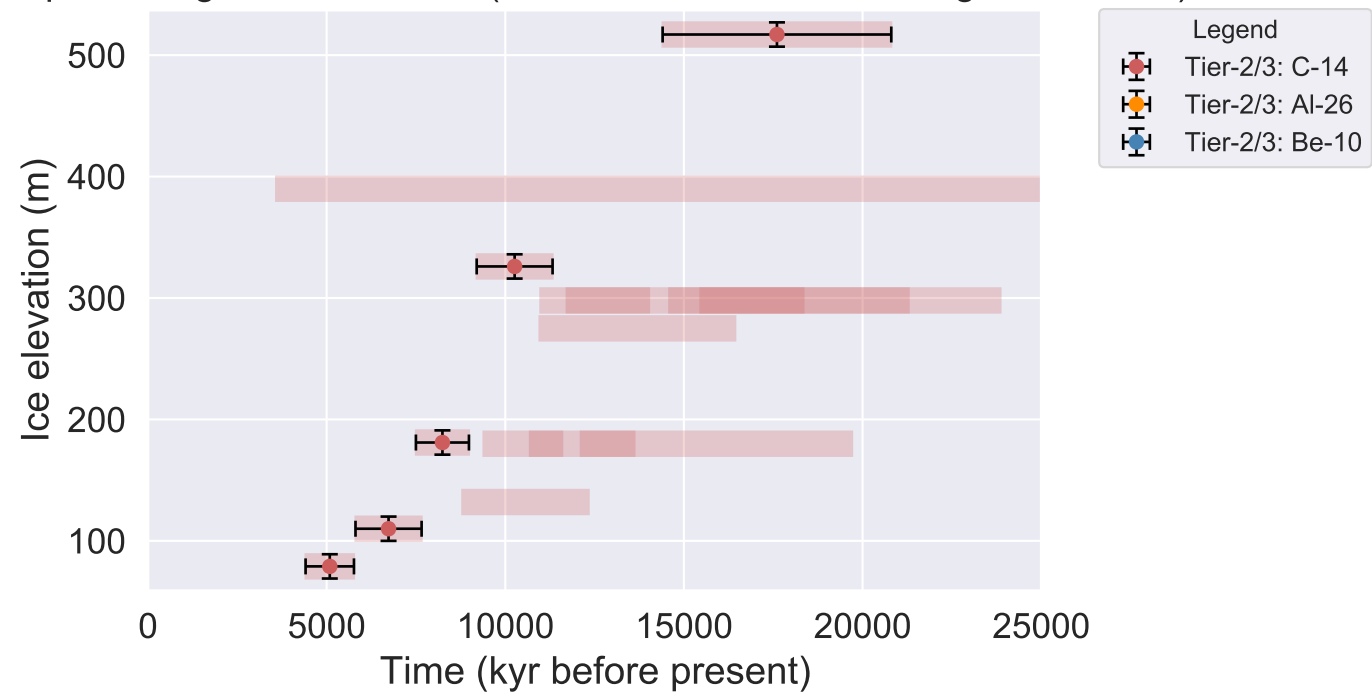

# Exposure ages at site: 1401 (Goehring et al., 2019)

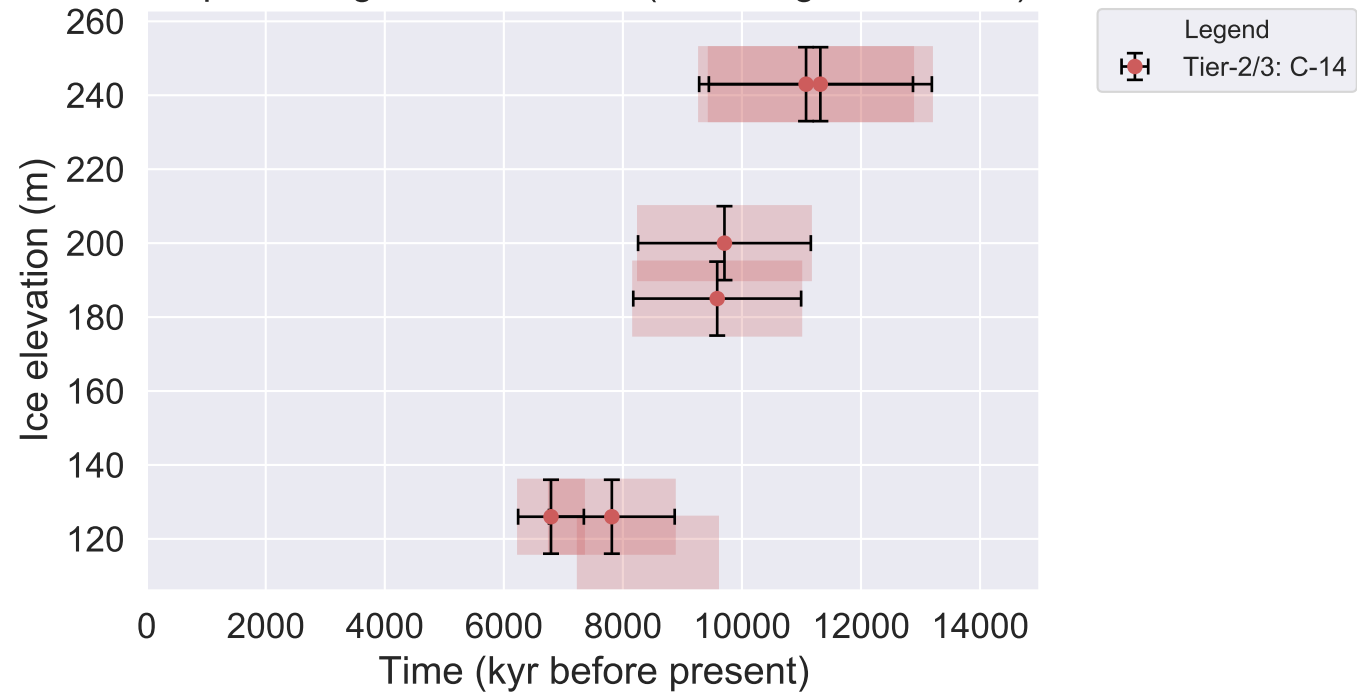

# Exposure ages at site: 1402 (Smellie et al., 2018)

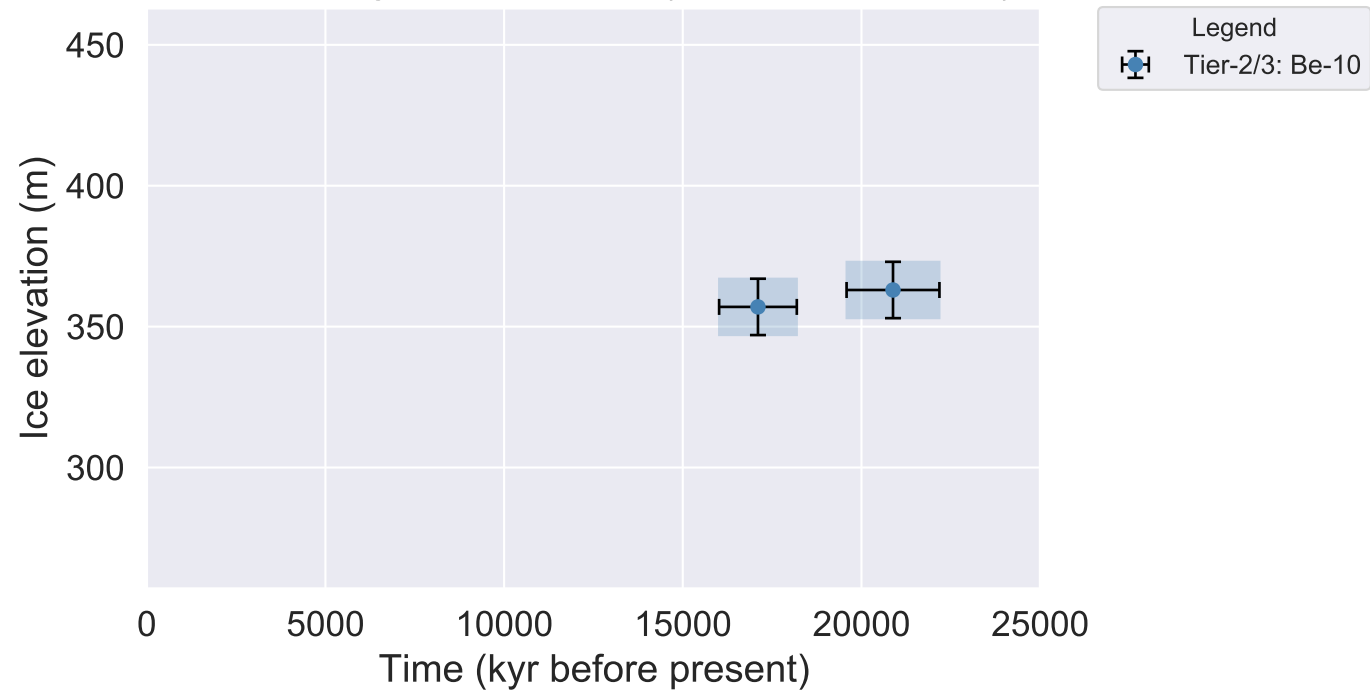

Exposure ages at site: 1403 (Rhee et al., 2019; Goehring et al., 2019)

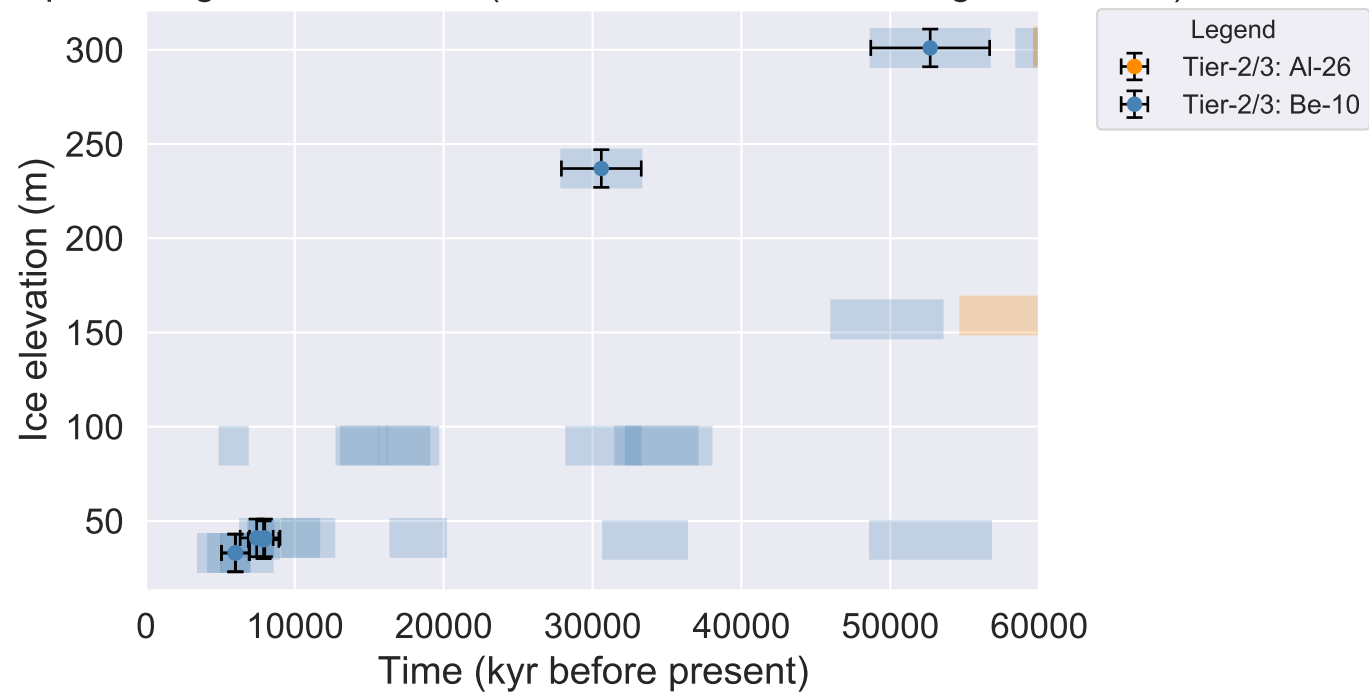

Exposure ages at site: 1404 (Goehring et al., 2019; Rhee et al., 2019)

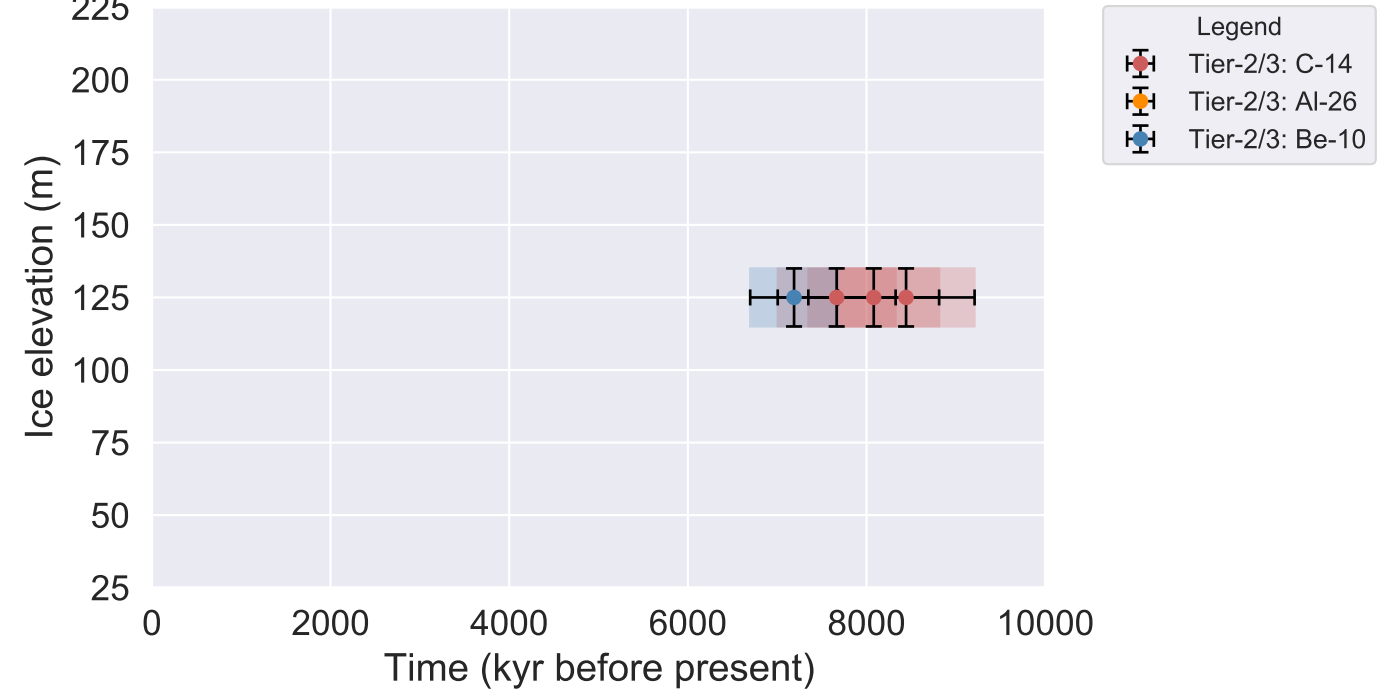

Exposure ages at site: 1405 (Rhee et al., 2020; Goehring et al., 2019)

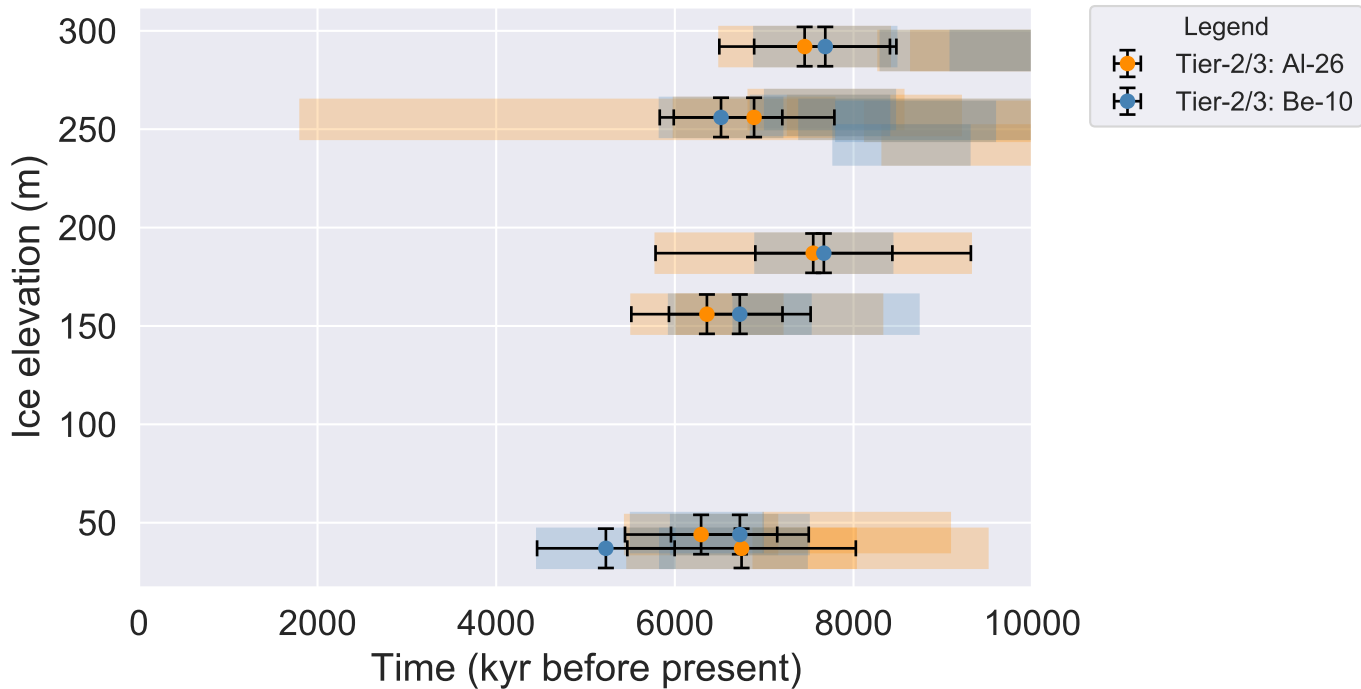

Exposure ages at site: 1406 (Stutz et al., 2020)

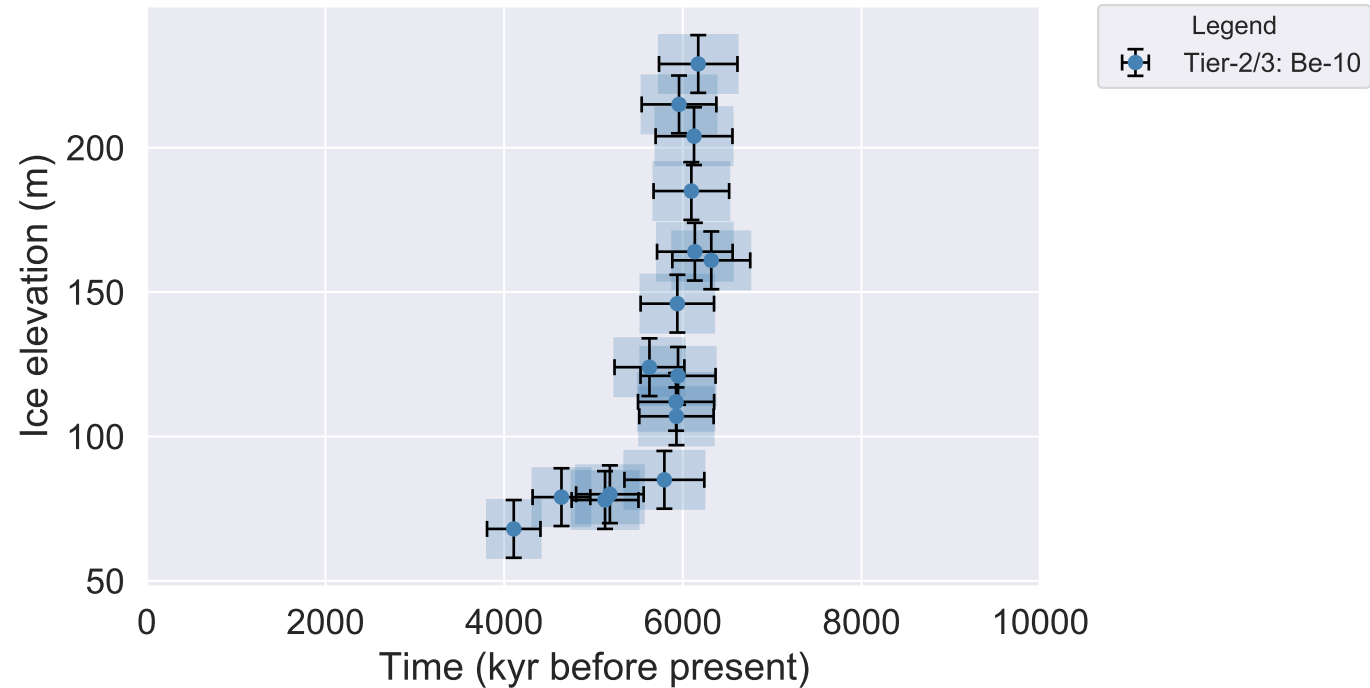

Exposure ages at site: 1407 (Stutz et al., 2020)

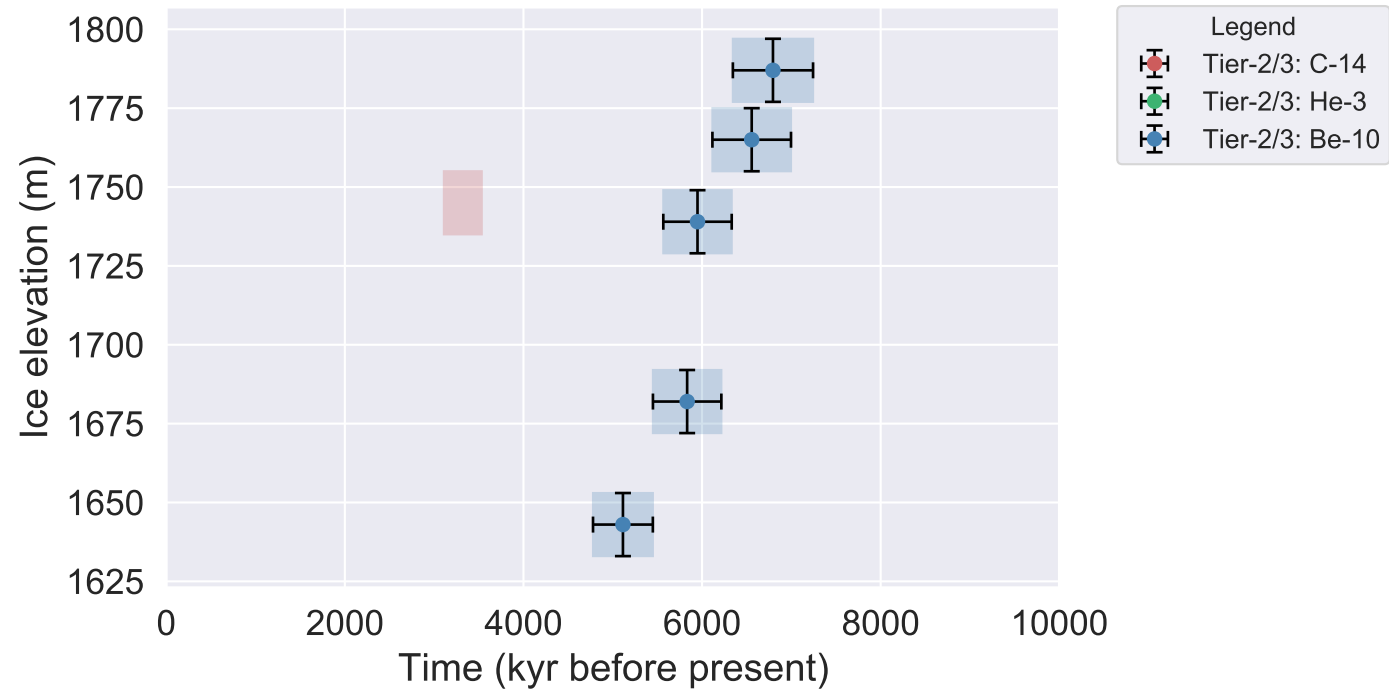

Exposure ages at site: 1408 (Jones et al., 2020)

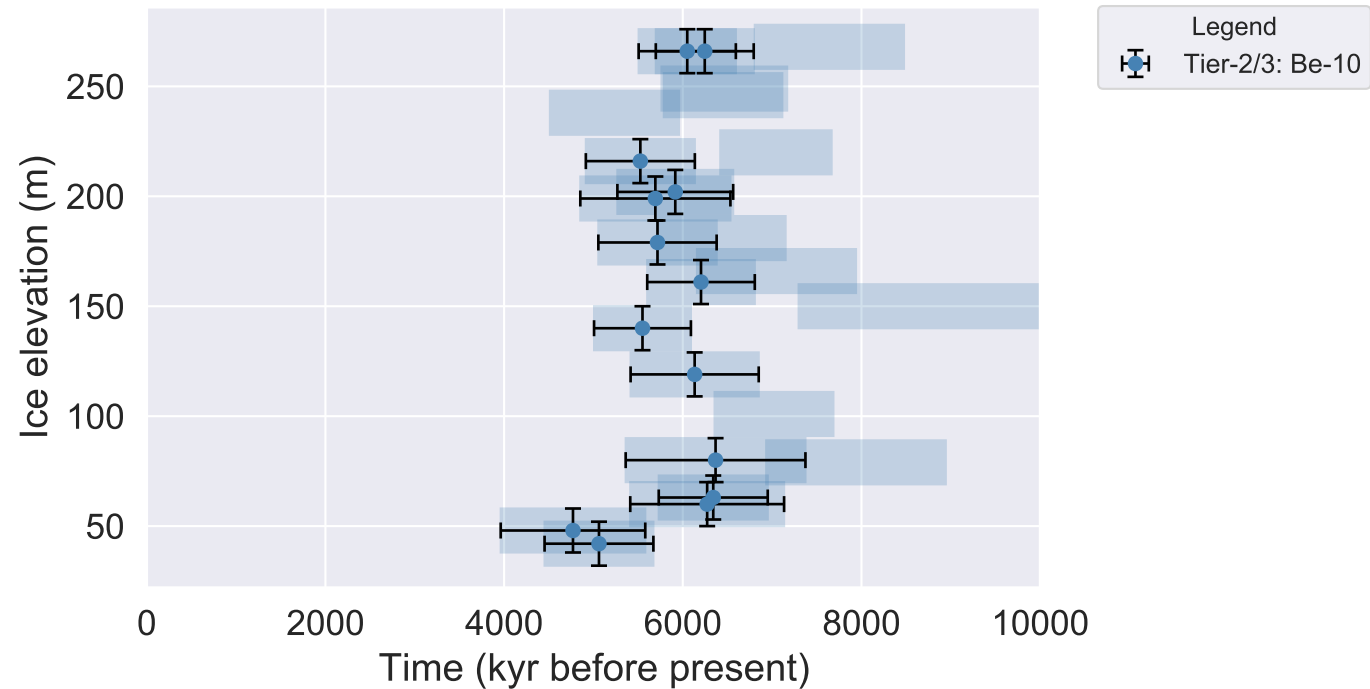

Exposure ages at site: 1409 (Jones et al., 2020)

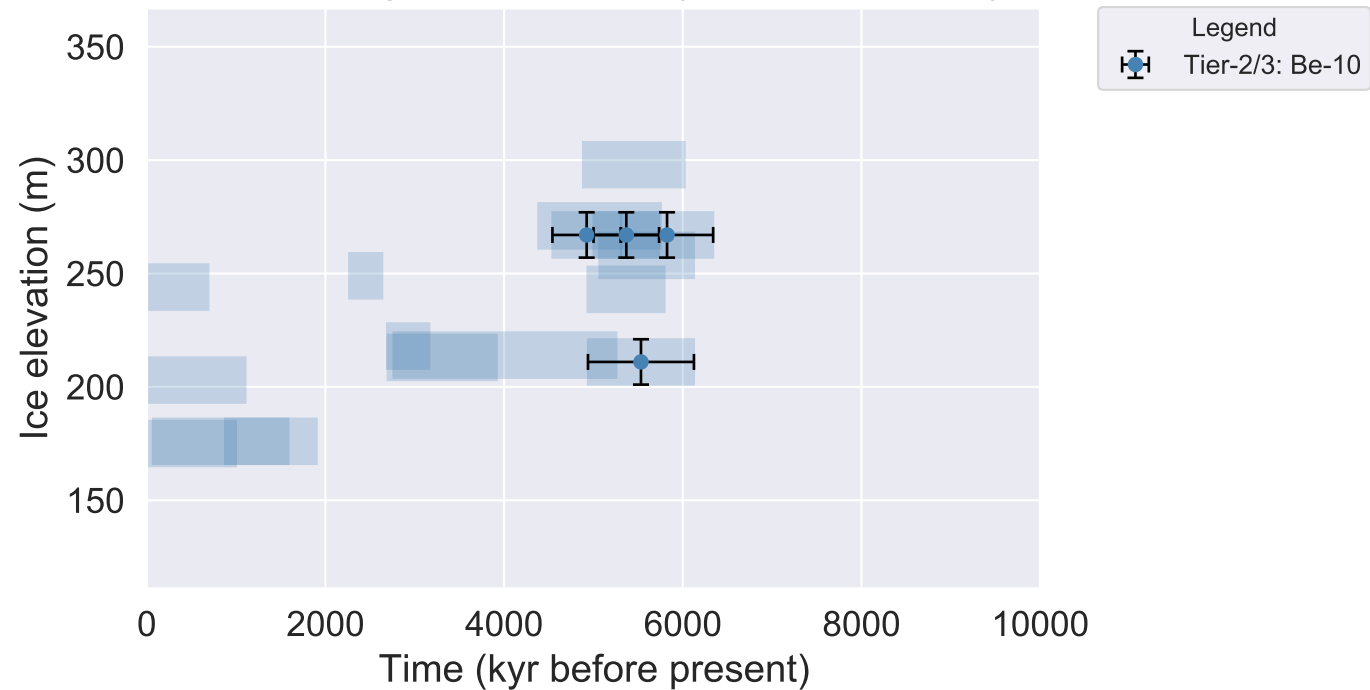

# Exposure ages at site: 1410 (Jones et al., 2015)

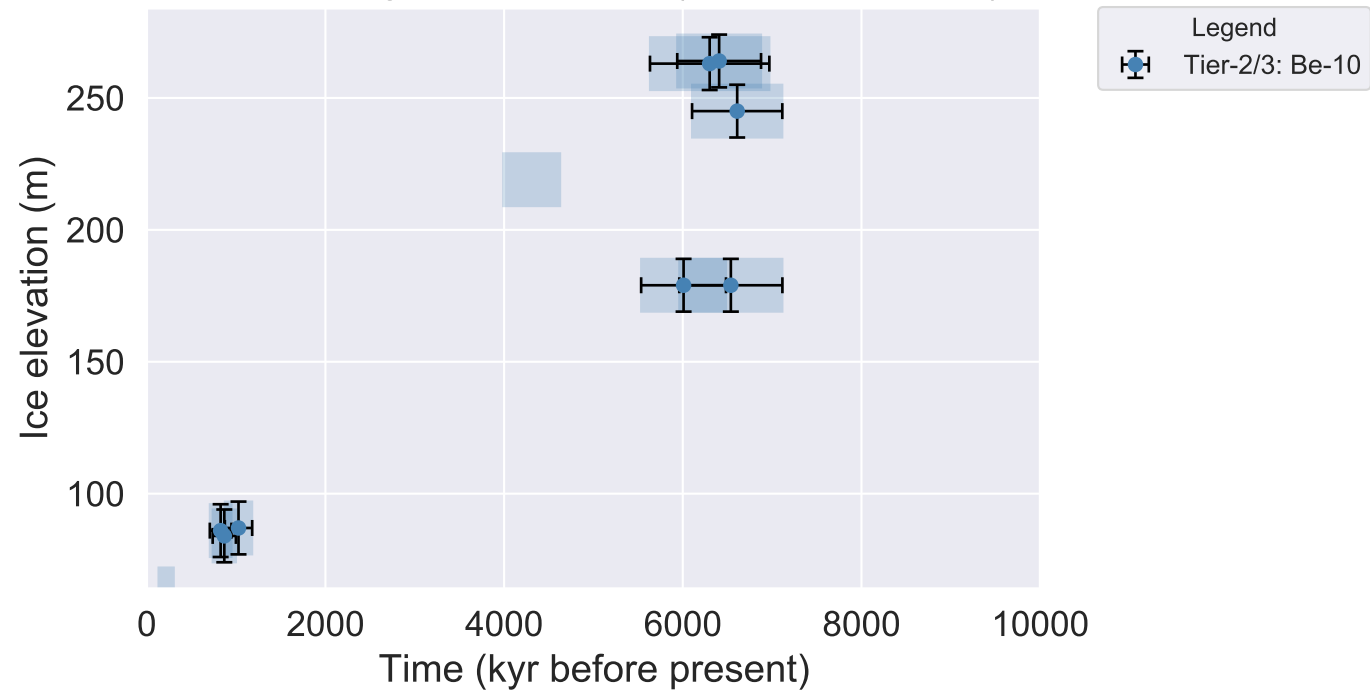

Exposure ages at site: 1411 (Jones et al., 2015)

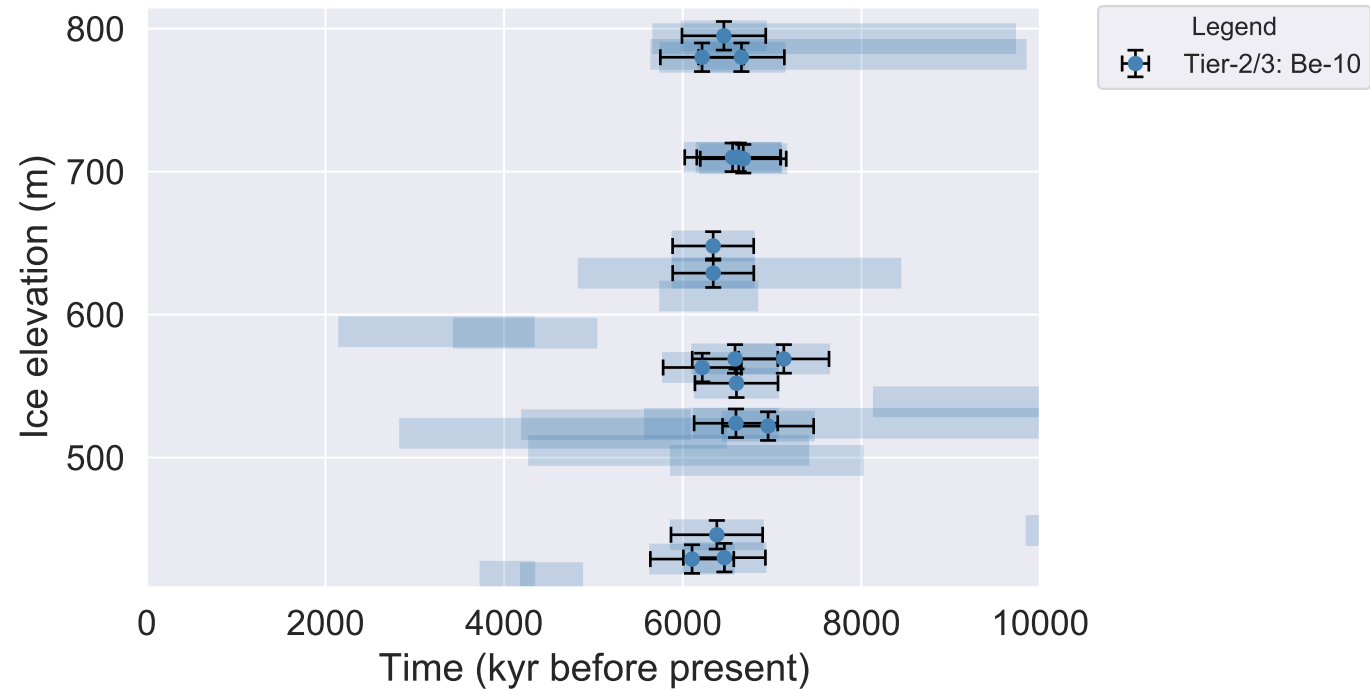

# Exposure ages at site: 1412 (Balco et al., 2014)

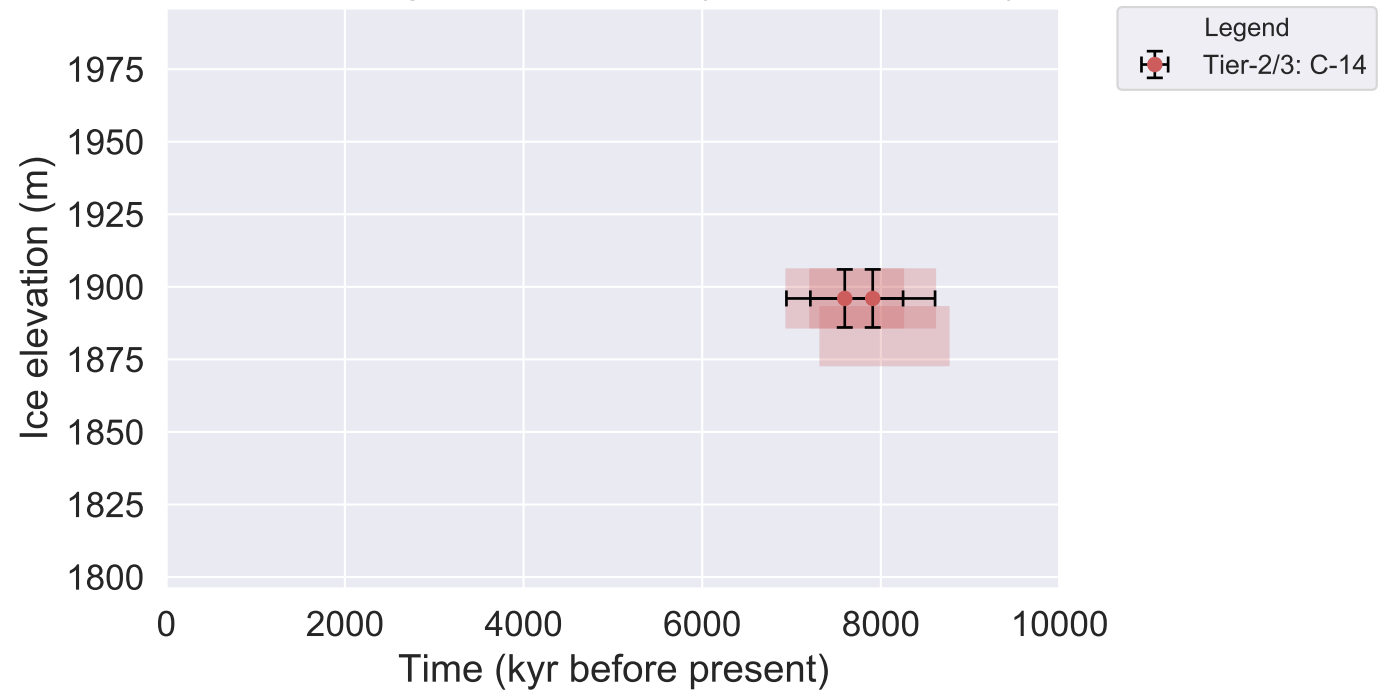

Exposure ages at site: 1413 (Kurt et al., 2017)

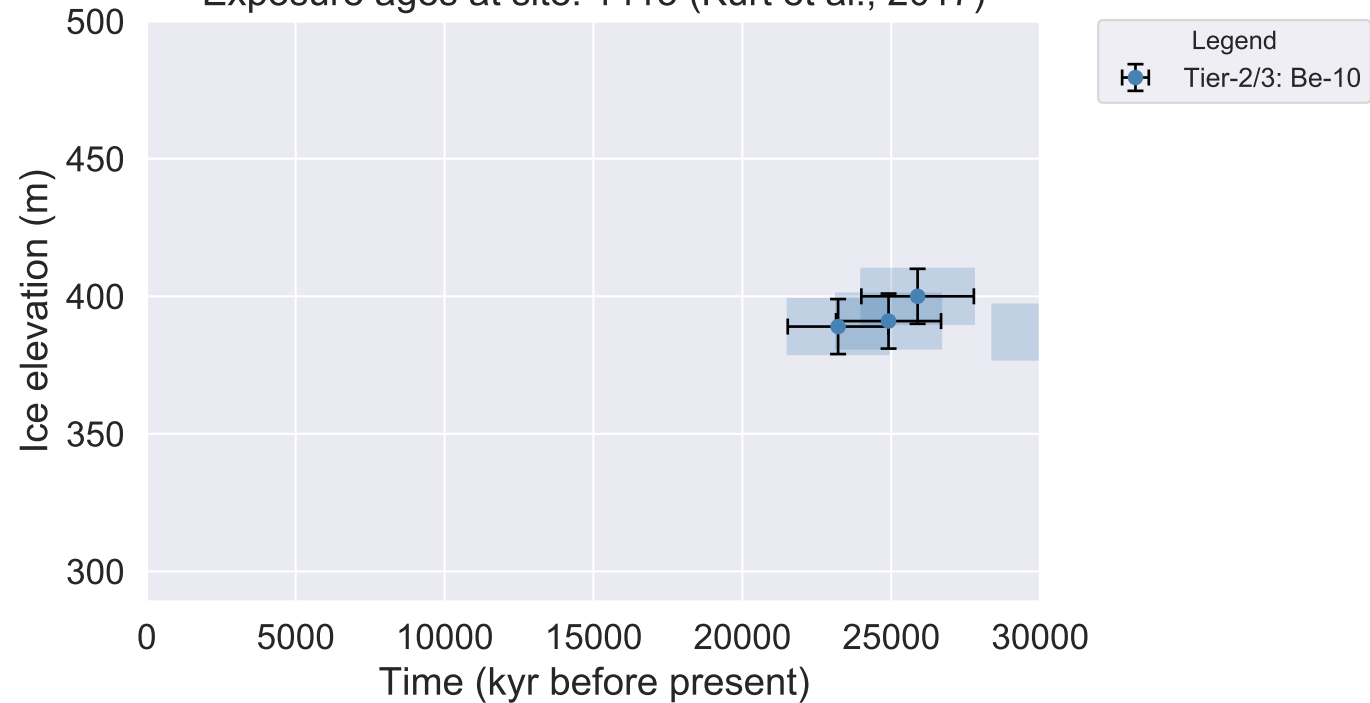

Exposure ages at site: 1414 (Kurt et al., 2017)

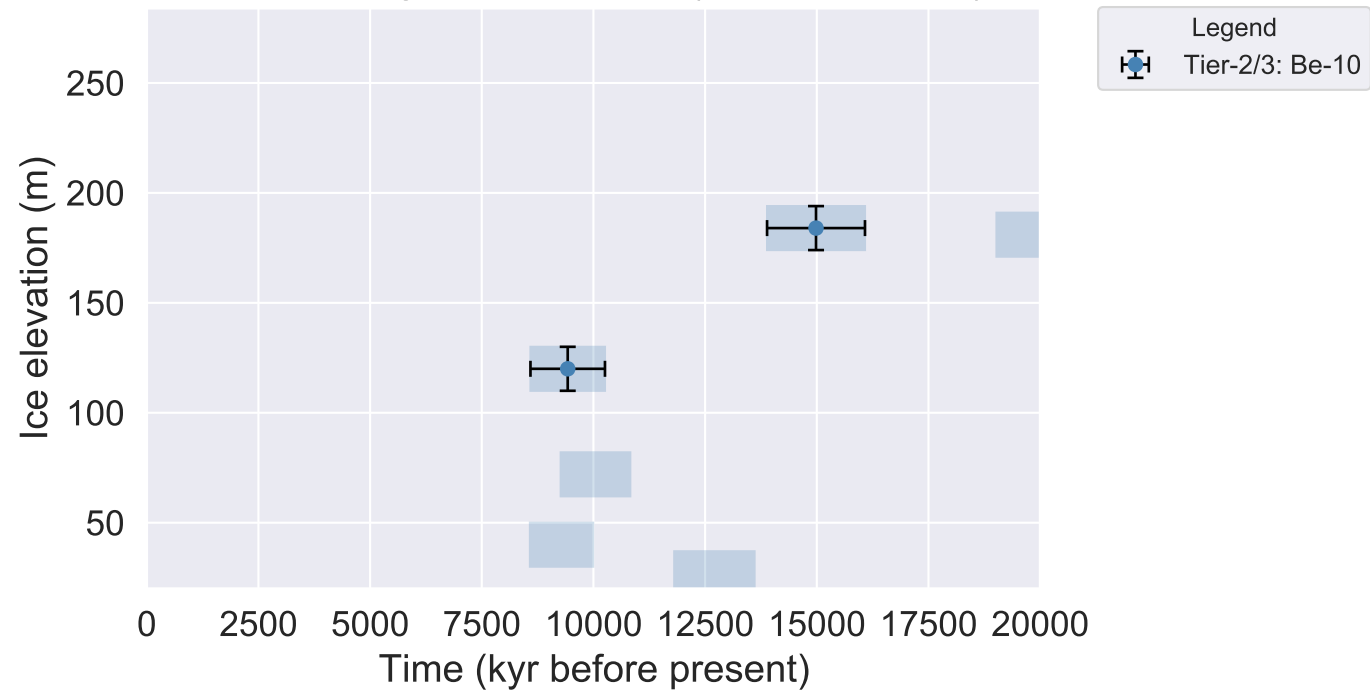

# Exposure ages at site: 1415 (Anderson et al., 2017)

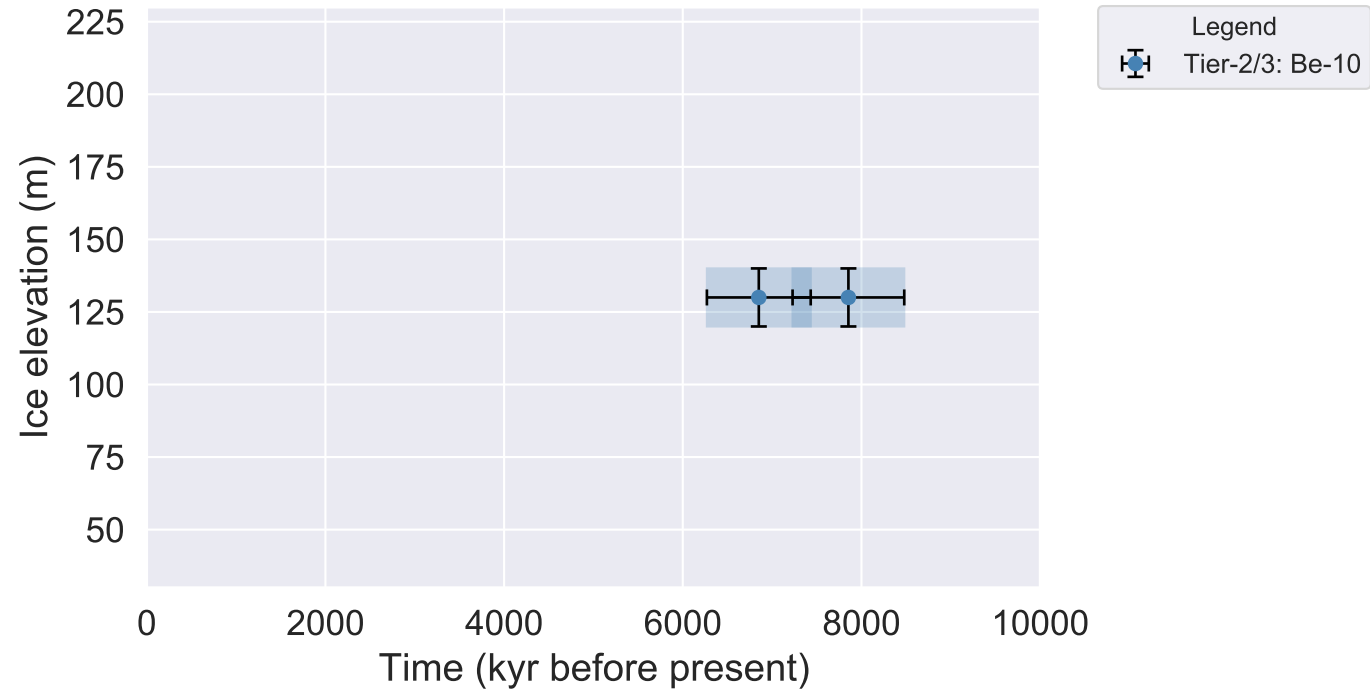

Exposure ages at site: 1416 (Anderson et al., 2017)

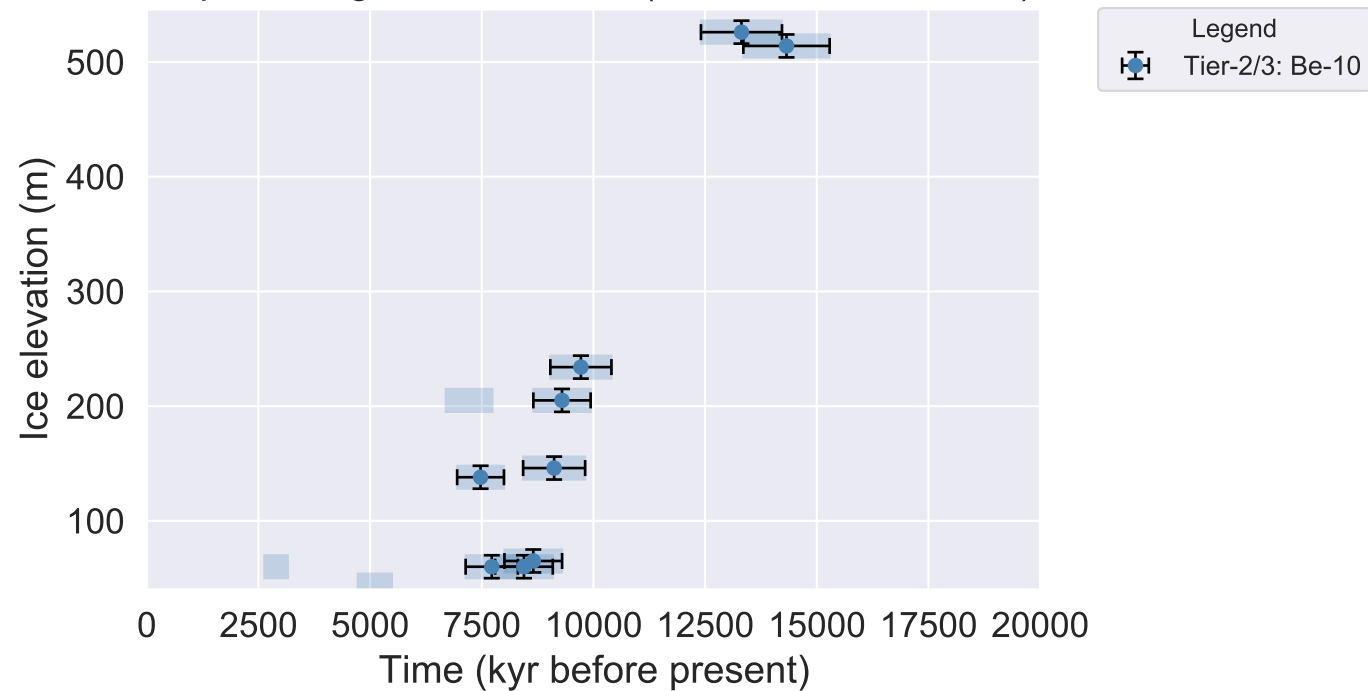

# Exposure ages at site: 1417 (Anderson et al., 2020)

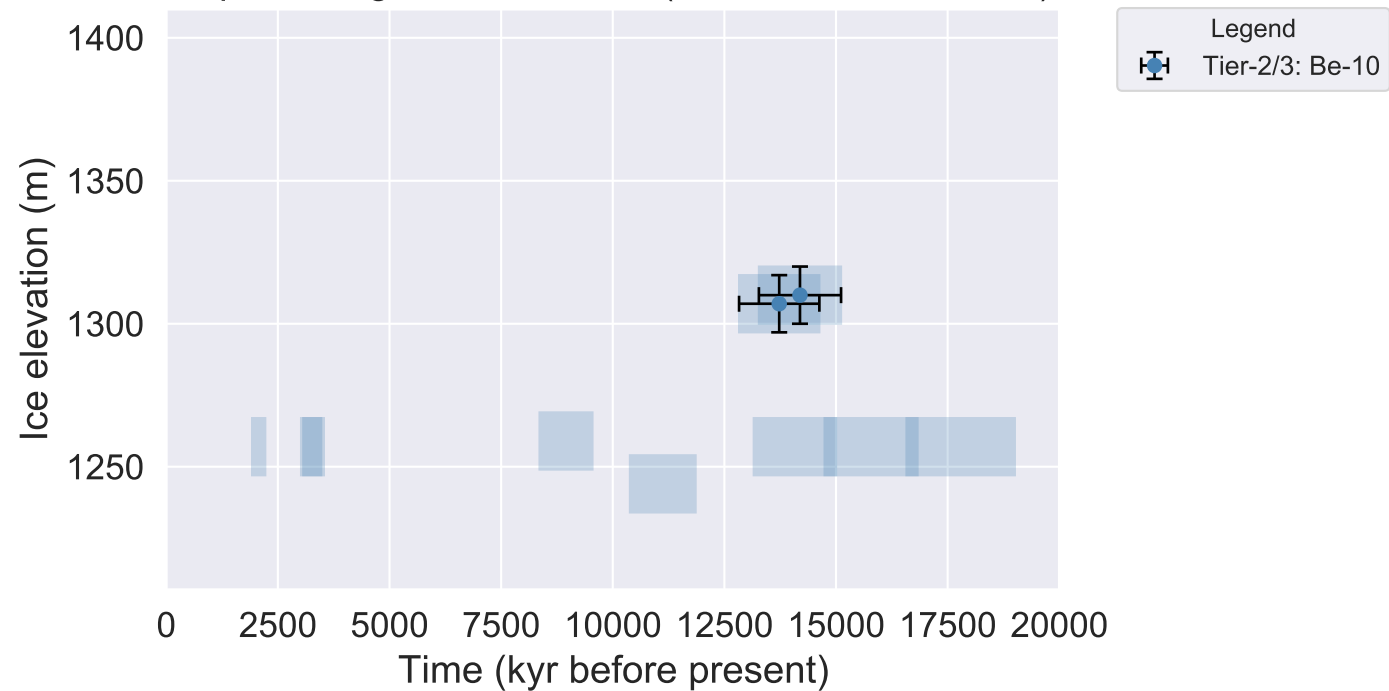

Exposure ages at site: 1418 (King et al., 2020; Storey et al., 2010)

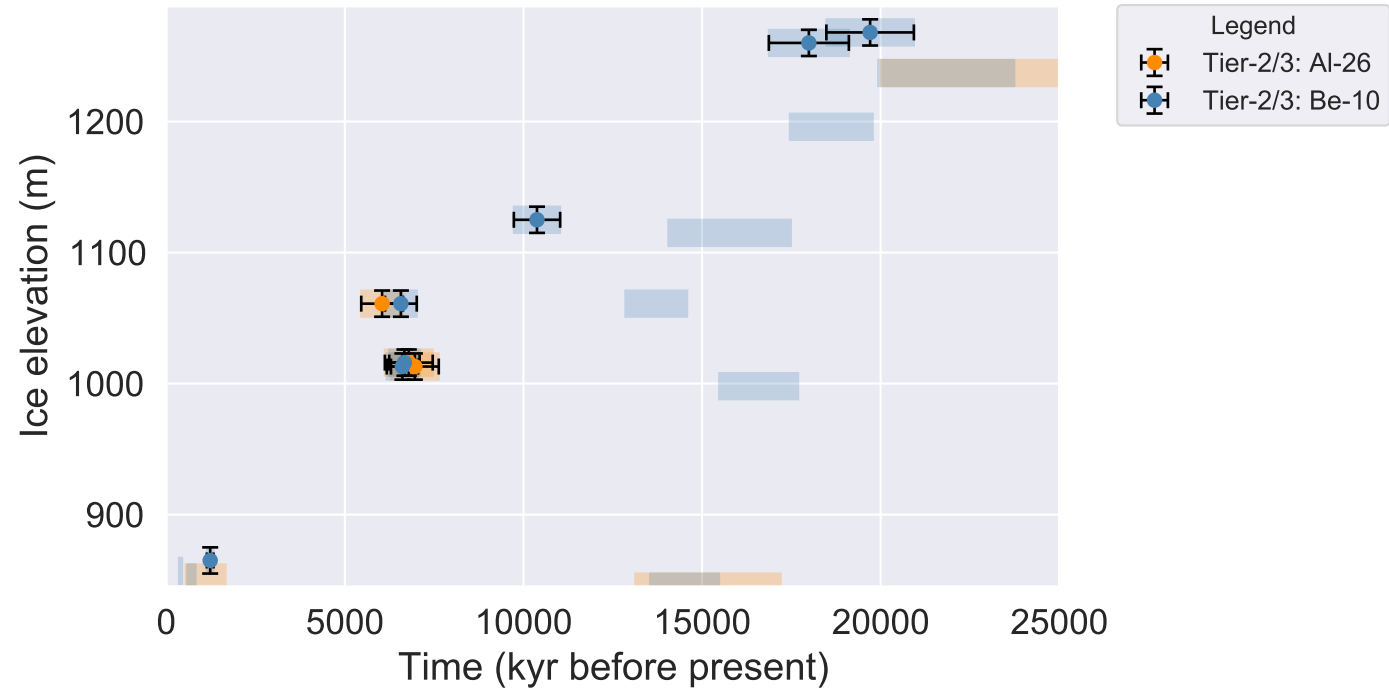

Exposure ages at site: 1419 (Joy et al., 2014; unpublished)

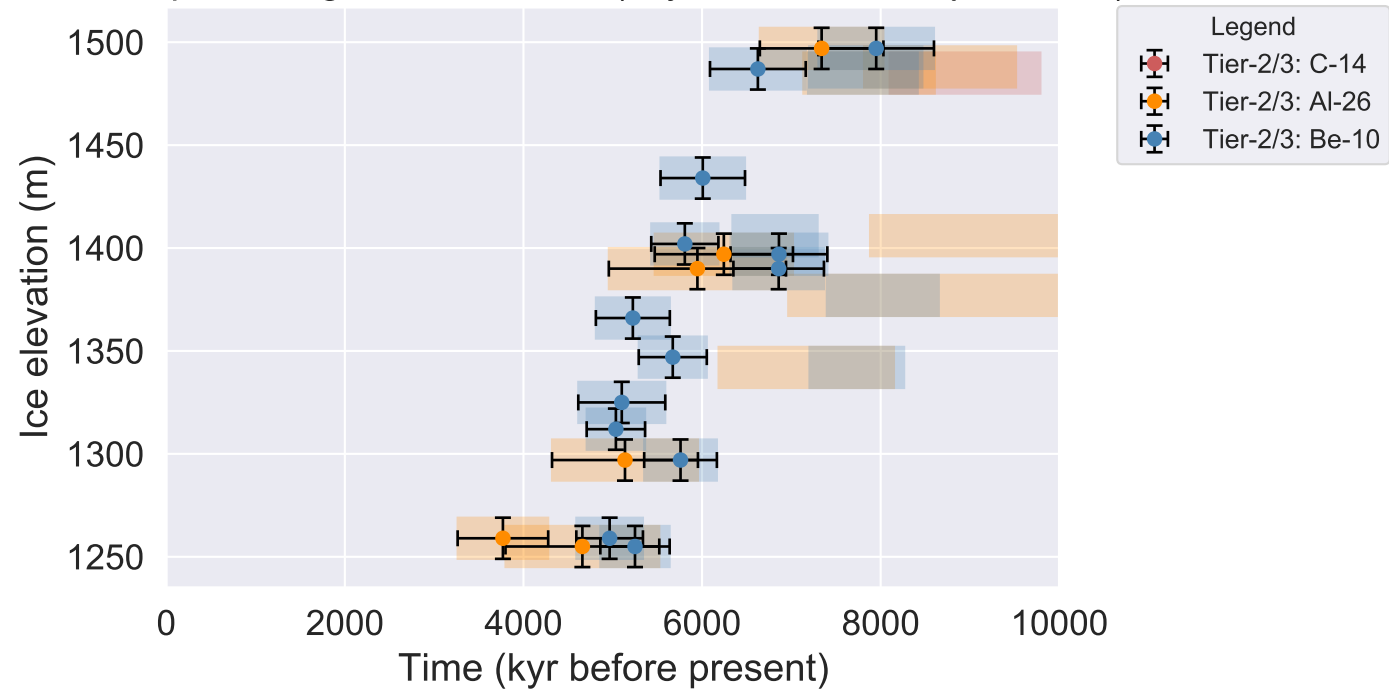

# Exposure ages at site: 1420 (Spector et al., 2017)

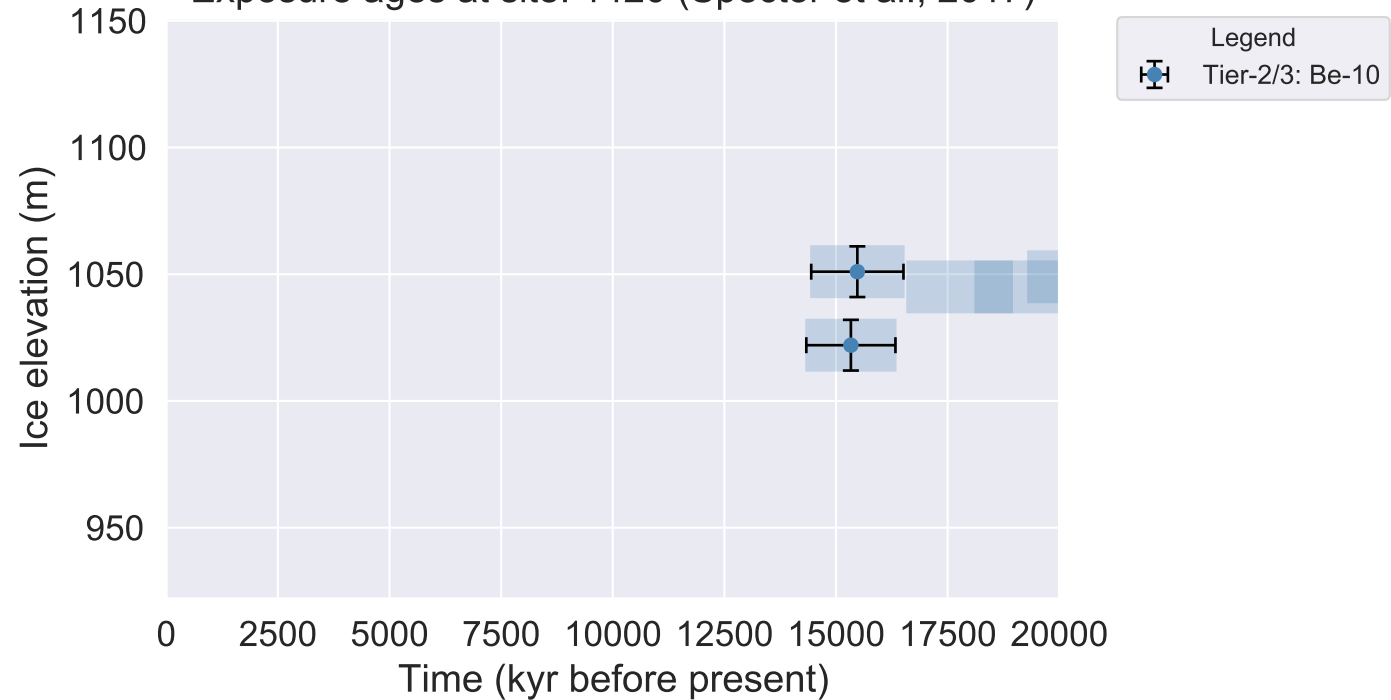

Exposure ages at site: 1421 (Spector et al., 2017)

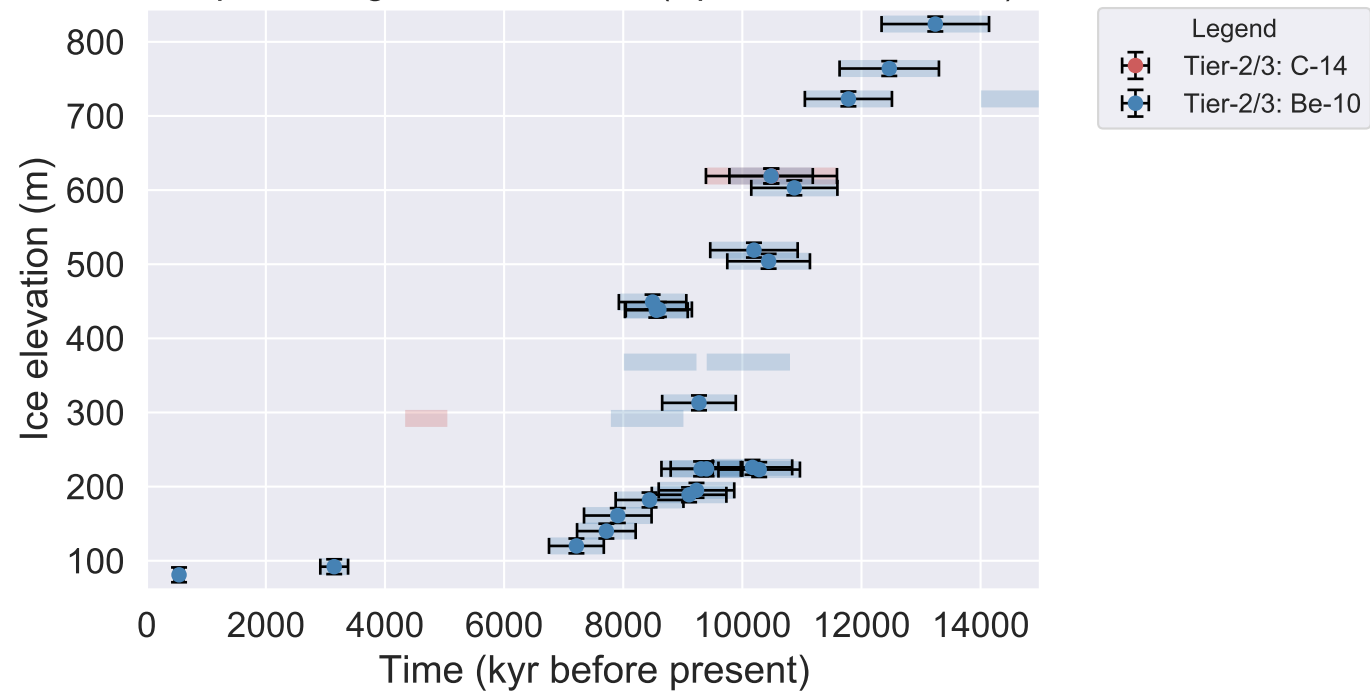

# Exposure ages at site: 1422 (Ackert et al., 2004; unpublished)

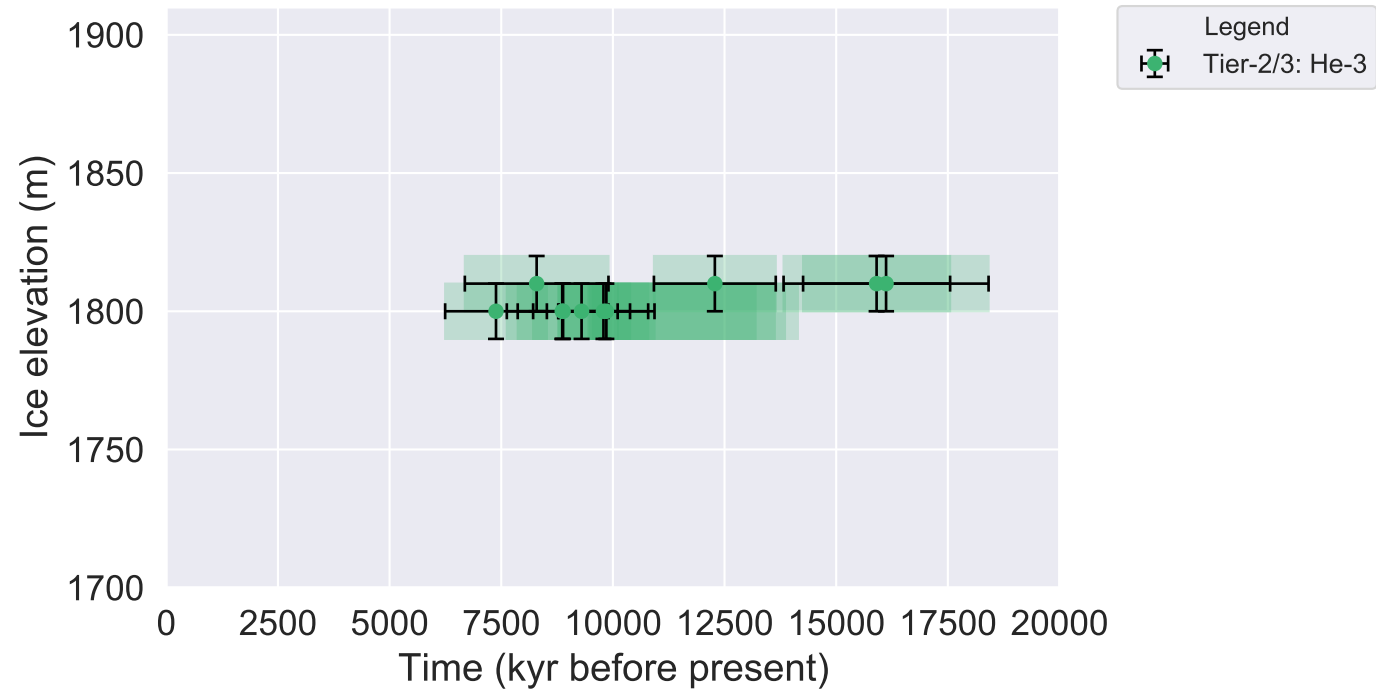

Exposure ages at site: 1423 (Spector et al., 2017)

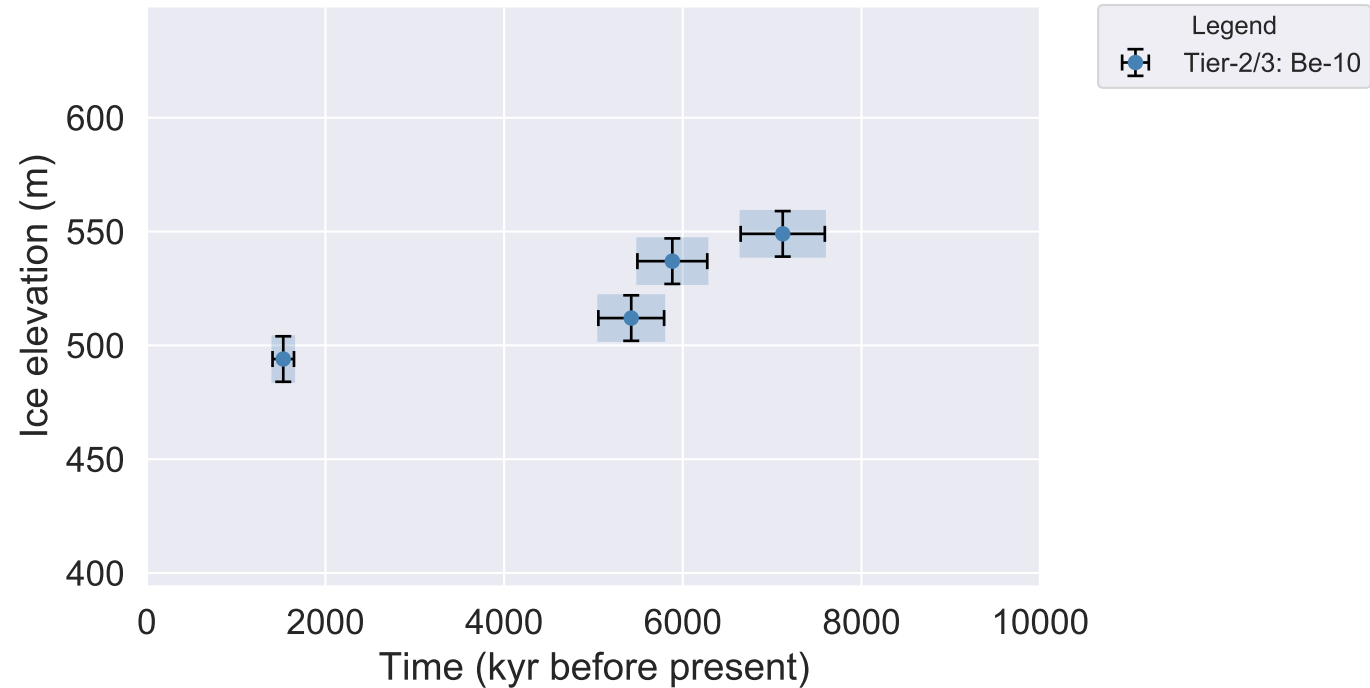

Exposure ages at site: 1424 (Balter-Kennedy et al., 2020; AckertThesis et al., 0)

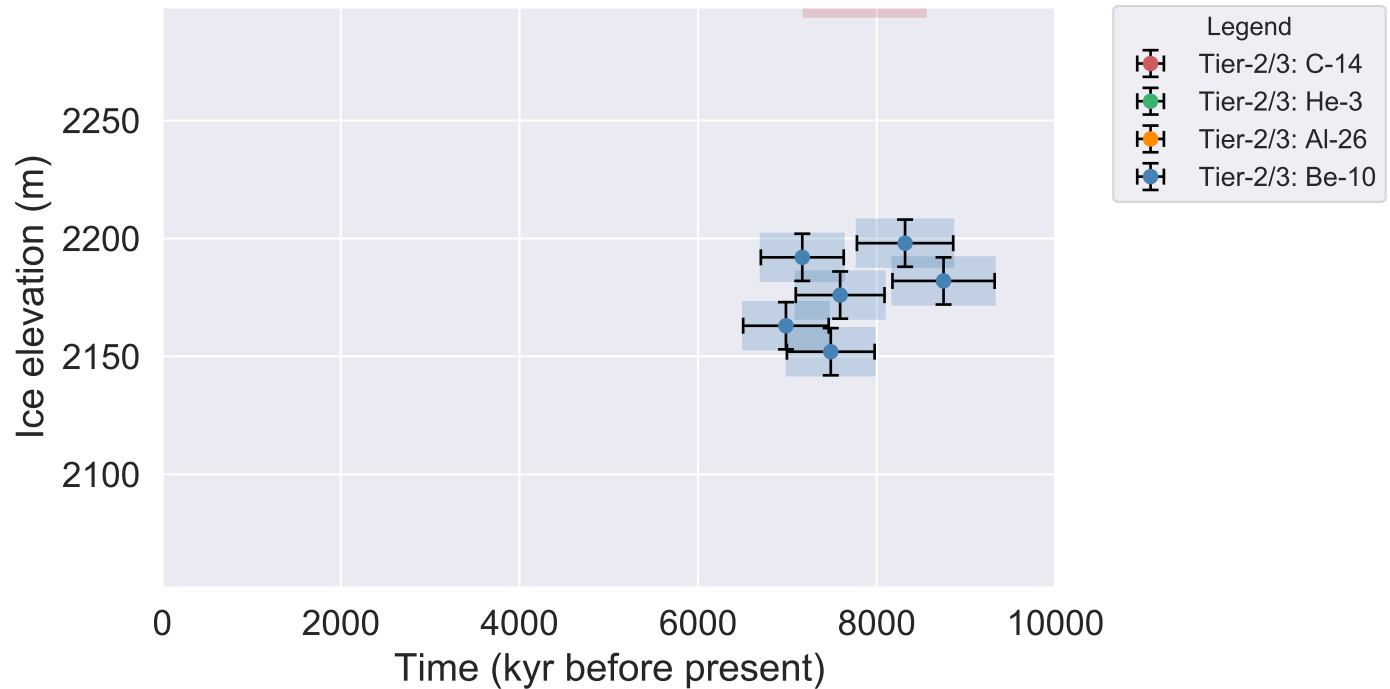

# Exposure ages at site: 1425 (unpublished)

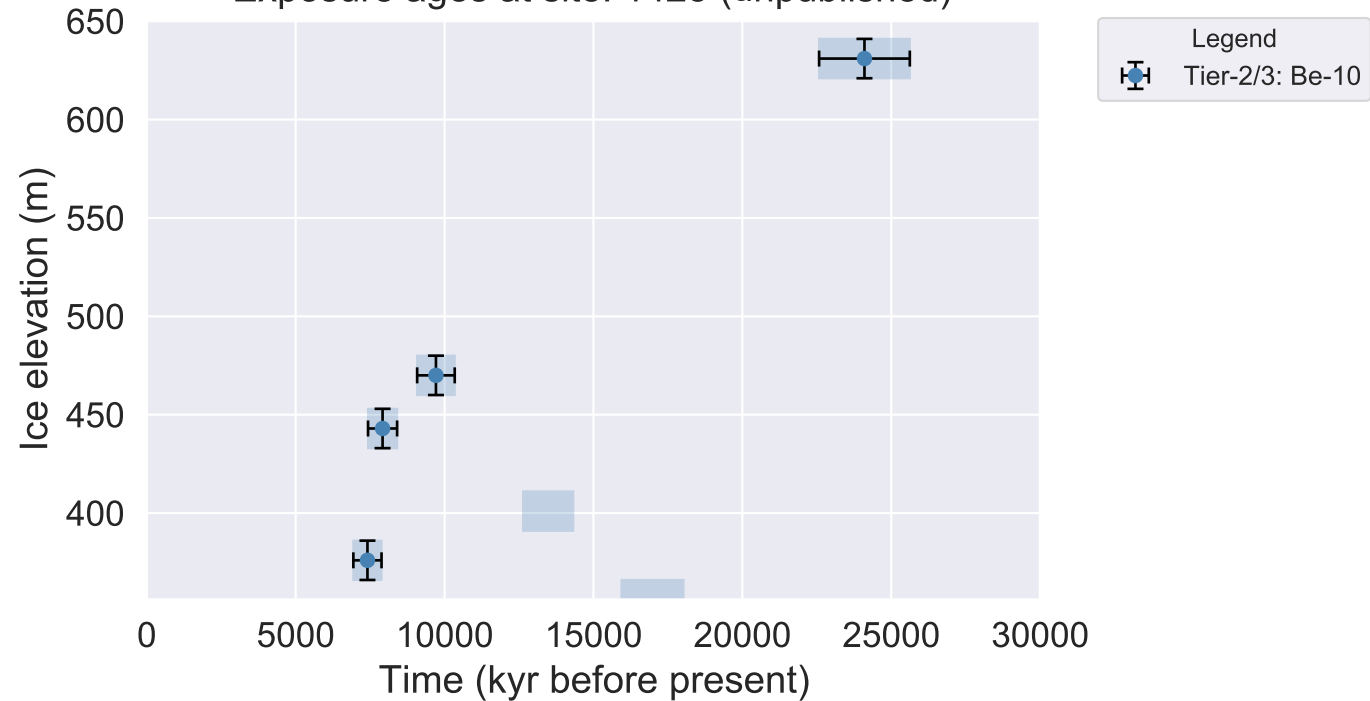

Exposure ages at site: 1426 (Spector et al., 2017)

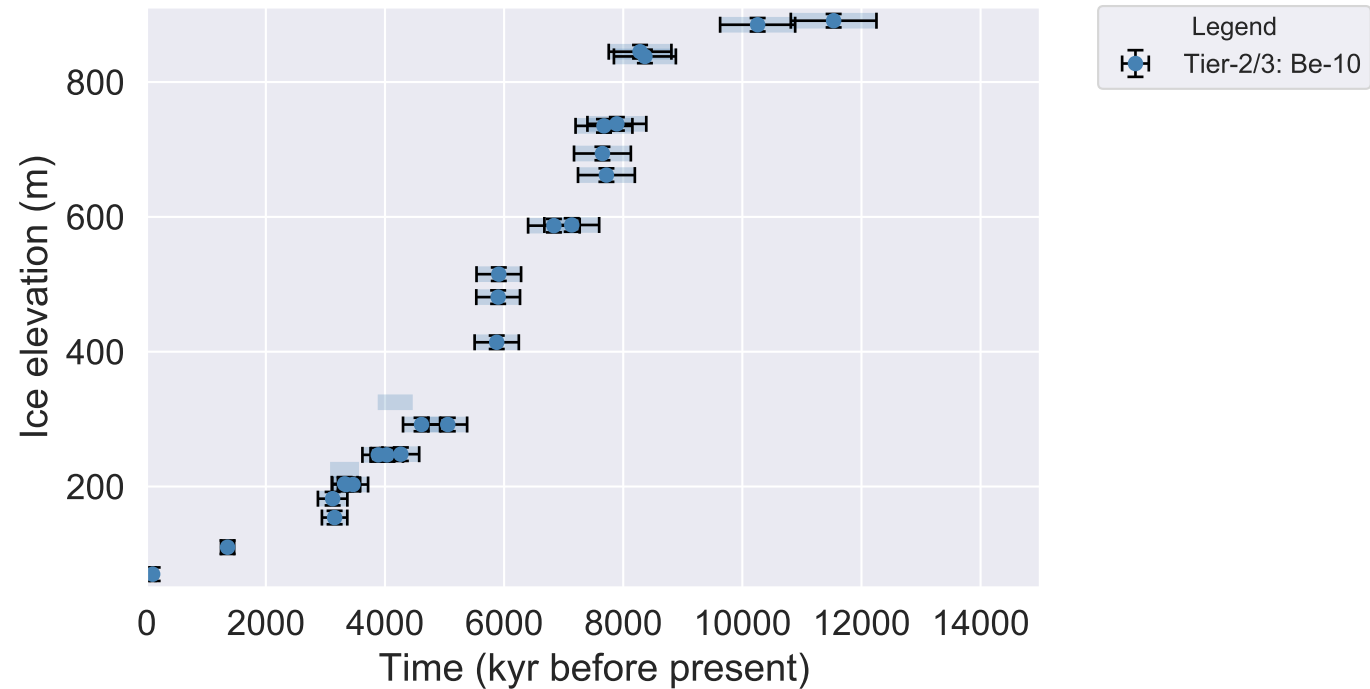

# Exposure ages at site: 1427 (Spector et al., 2017)

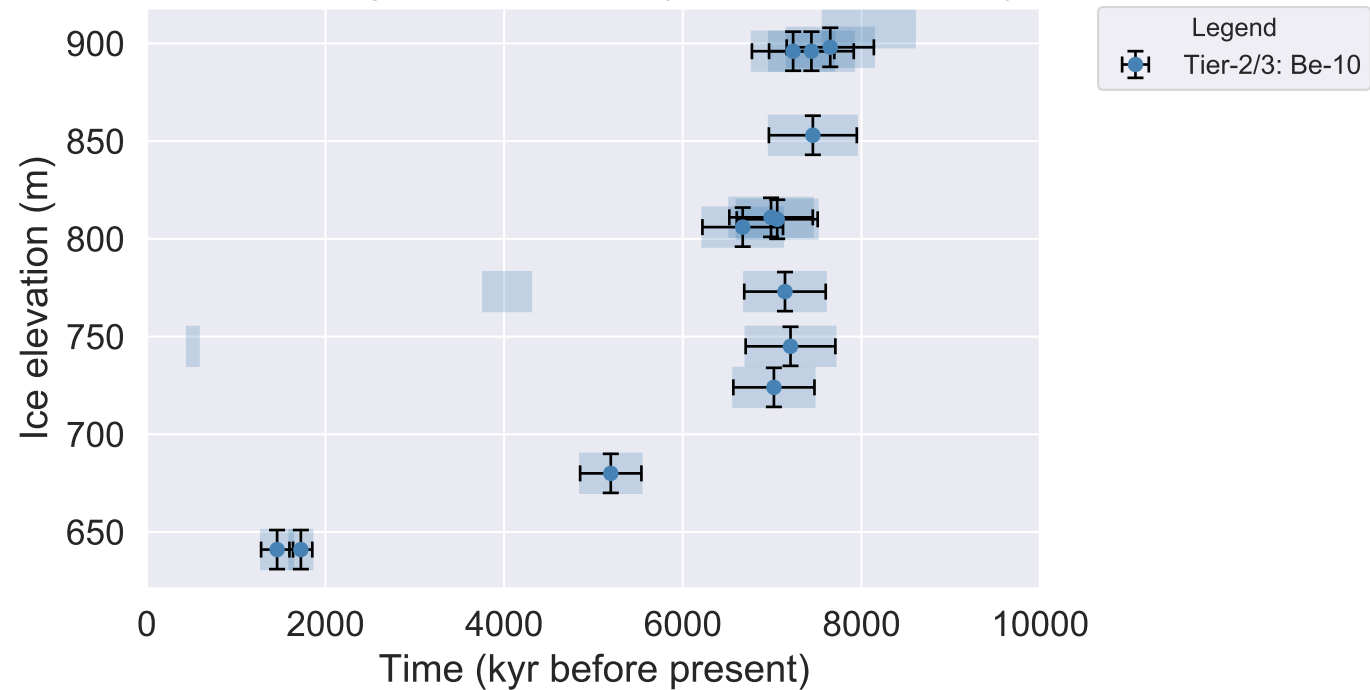

Exposure ages at site: 1428 (Todd et al., 2010)

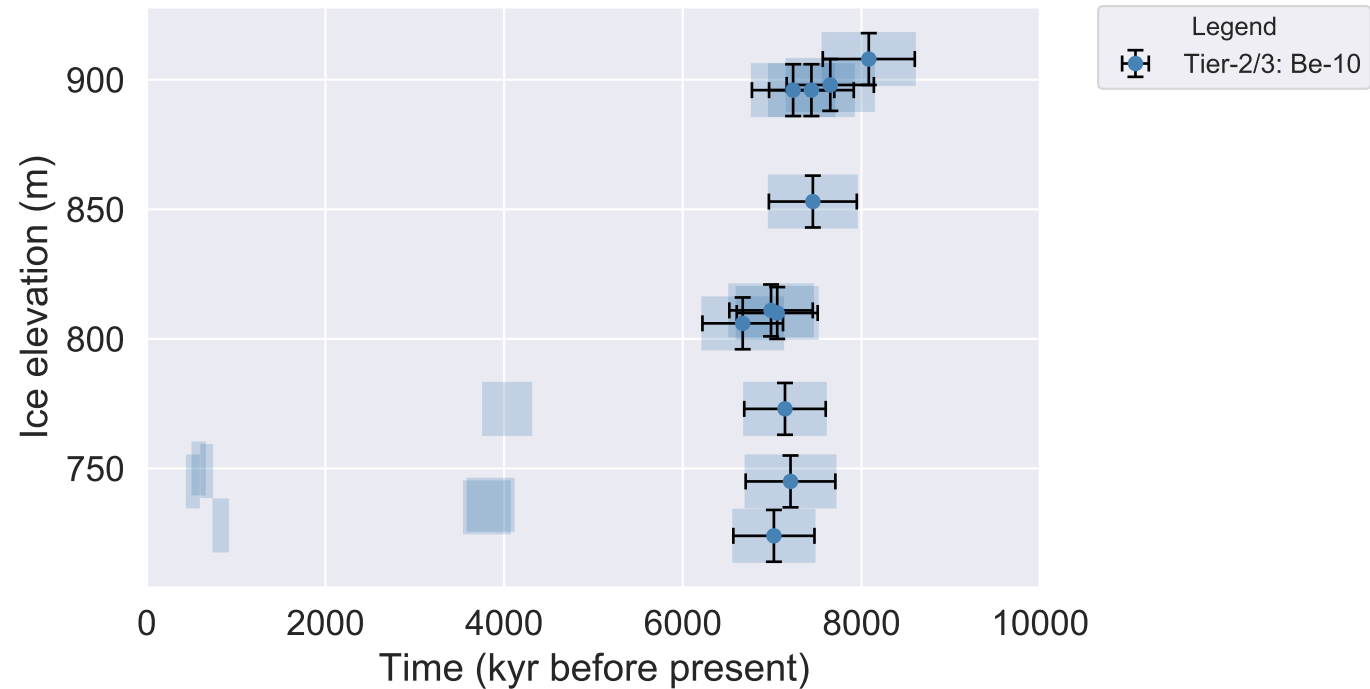

# Exposure ages at site: 1429 (Todd et al., 2010)

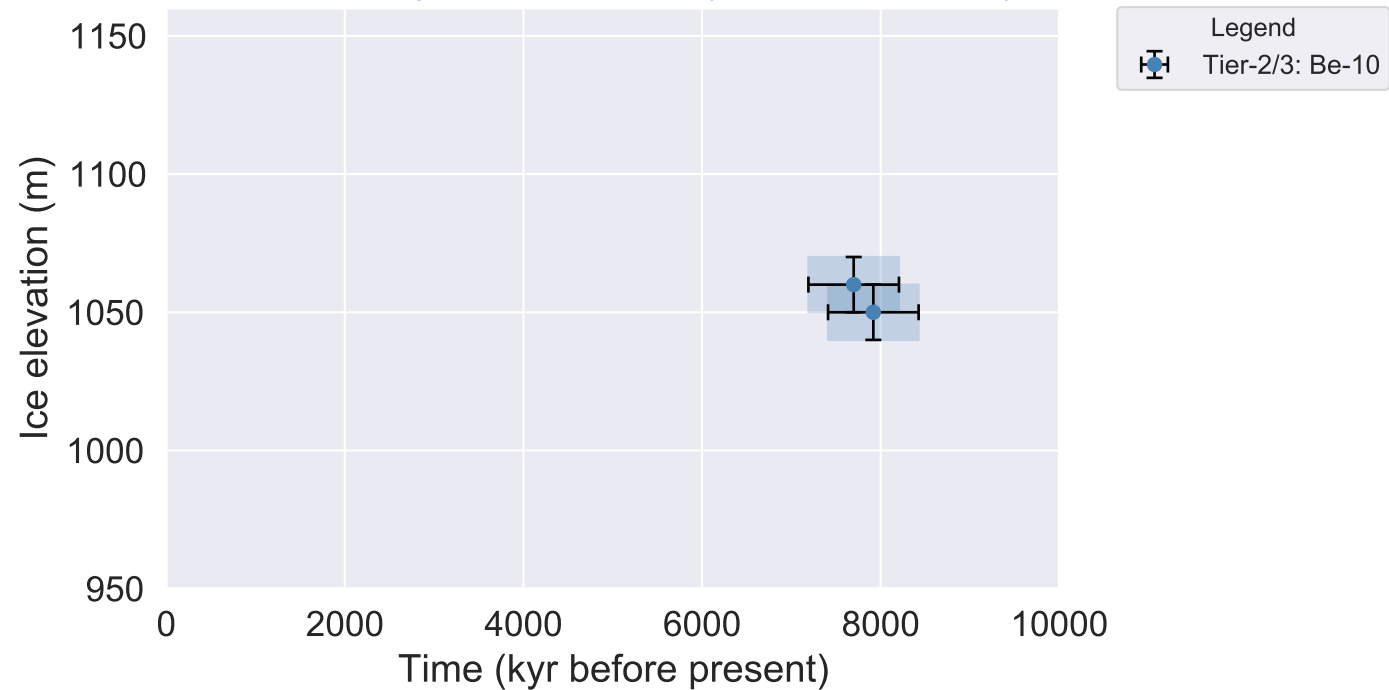

# Exposure ages at site: 1430 (Todd et al., 2010)

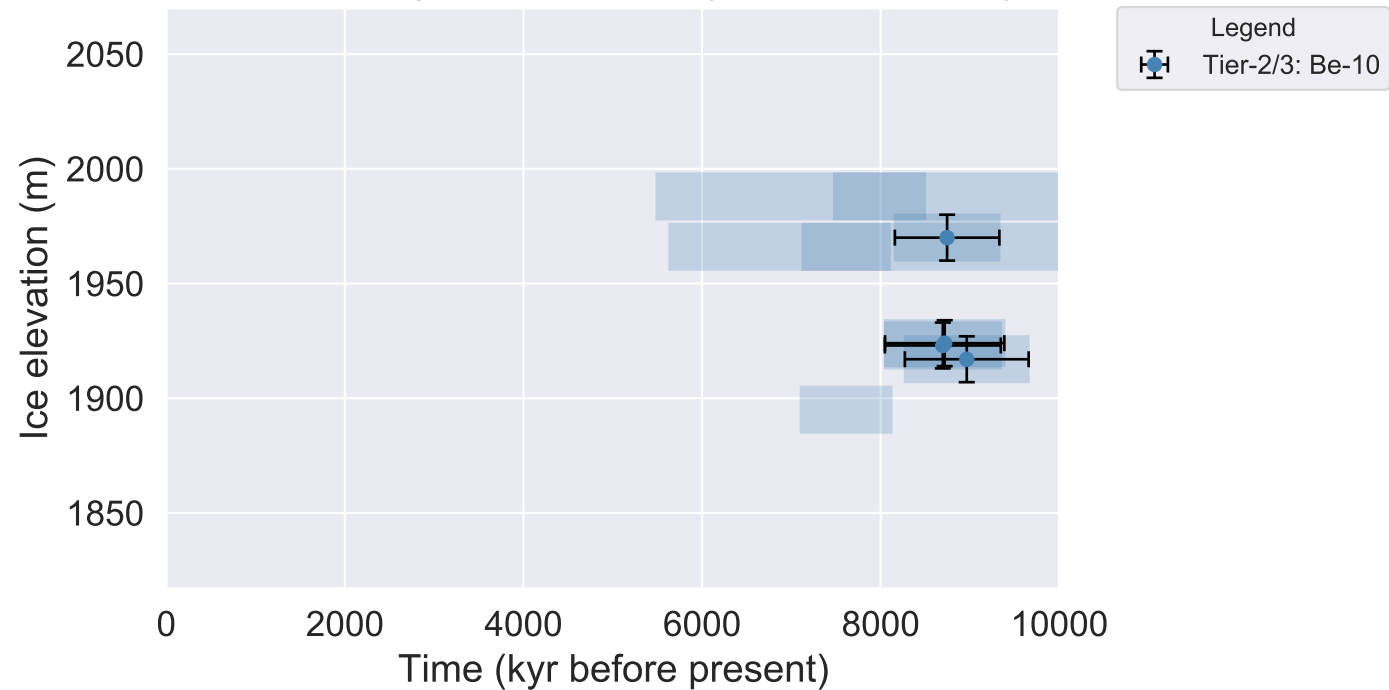

Exposure ages at site: 1431 (Todd et al., 2010)

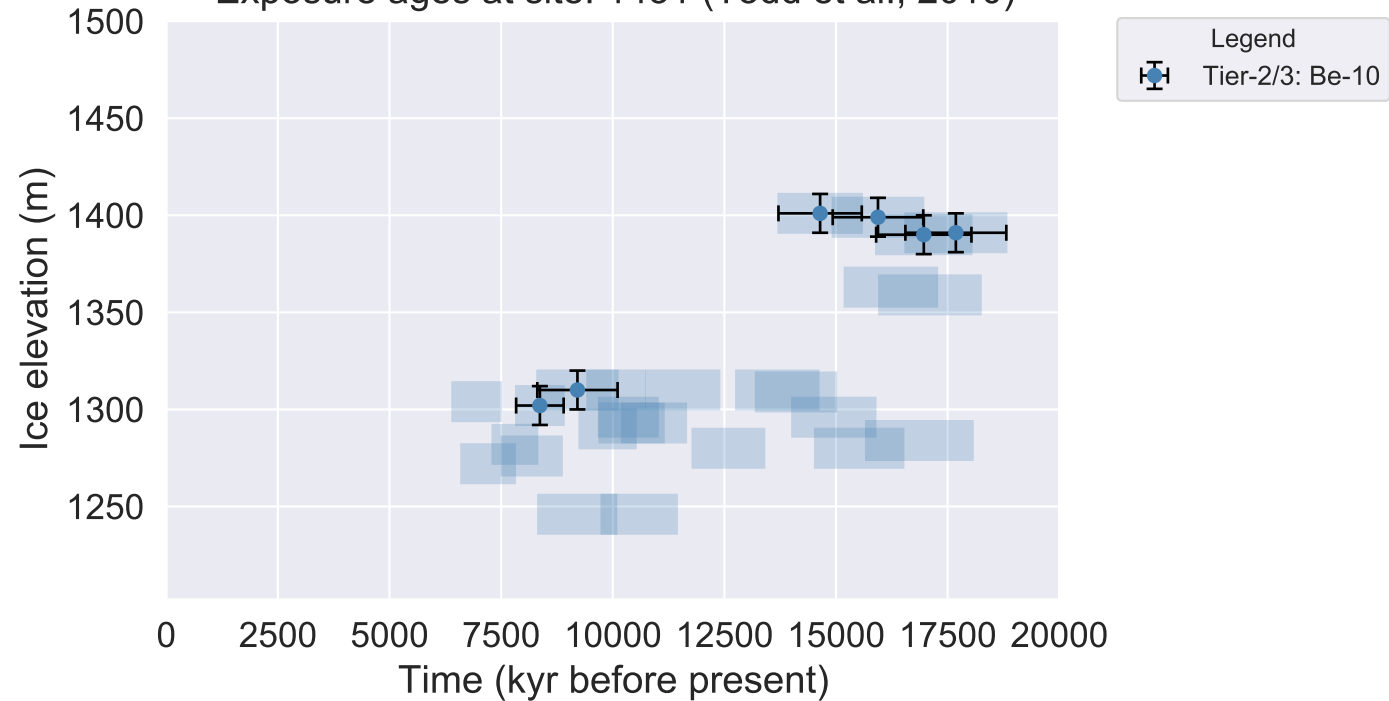

# Exposure ages at site: 1432 (Hall et al., 2017)

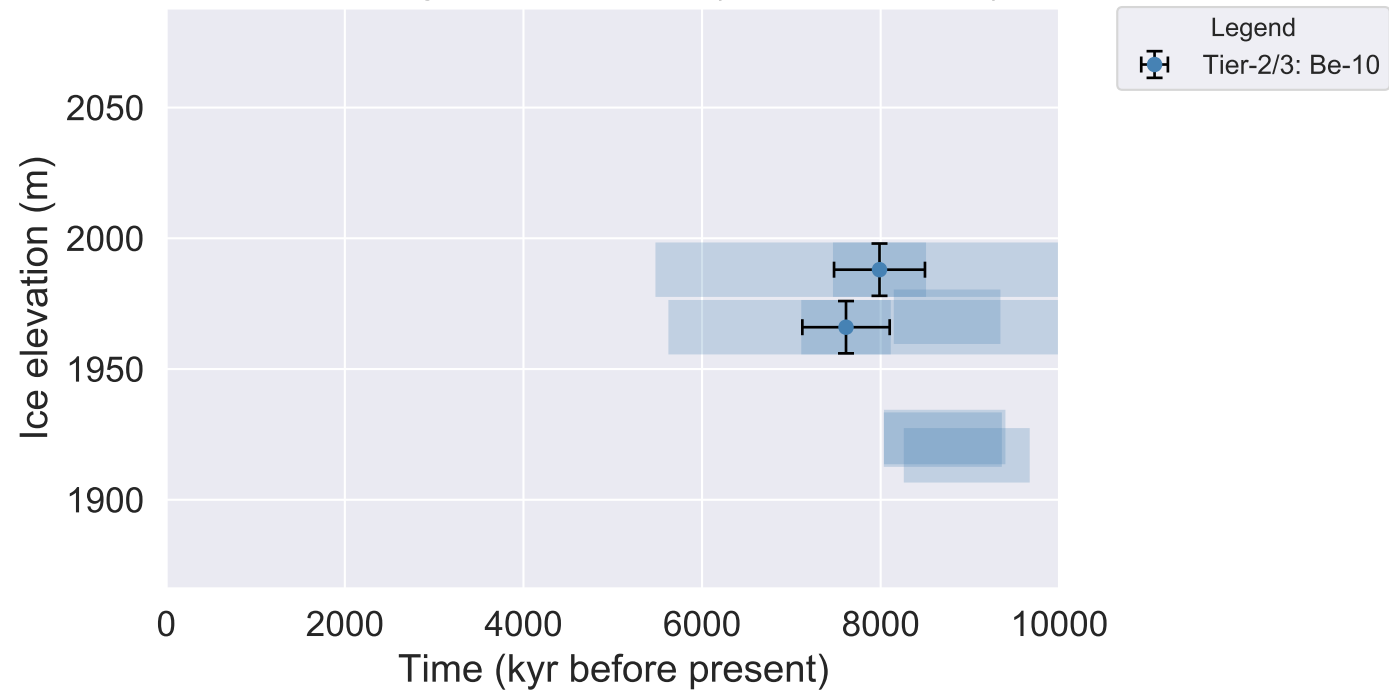

Exposure ages at site: 1433 (Ackert et al., 2011; Ackert et al., 2007)

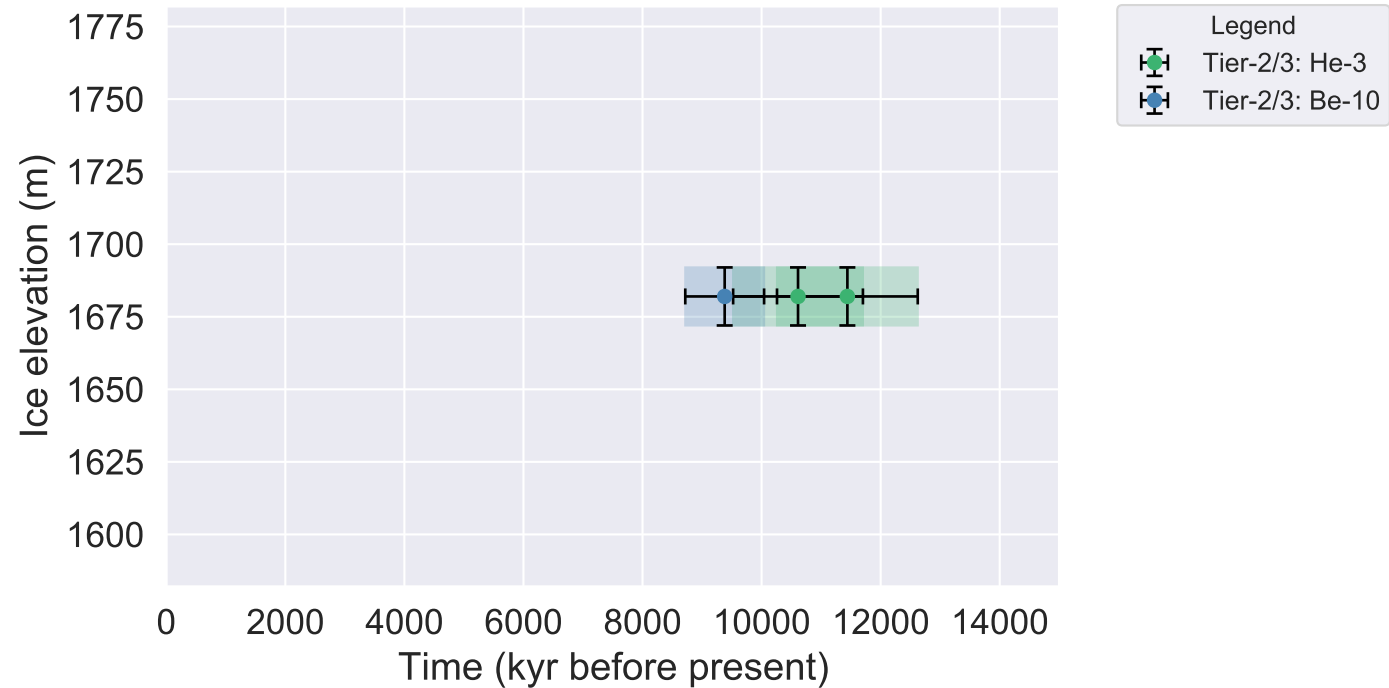

Exposure ages at site: 1434 (Spector et al., 2019; Ackert et al., 2007)

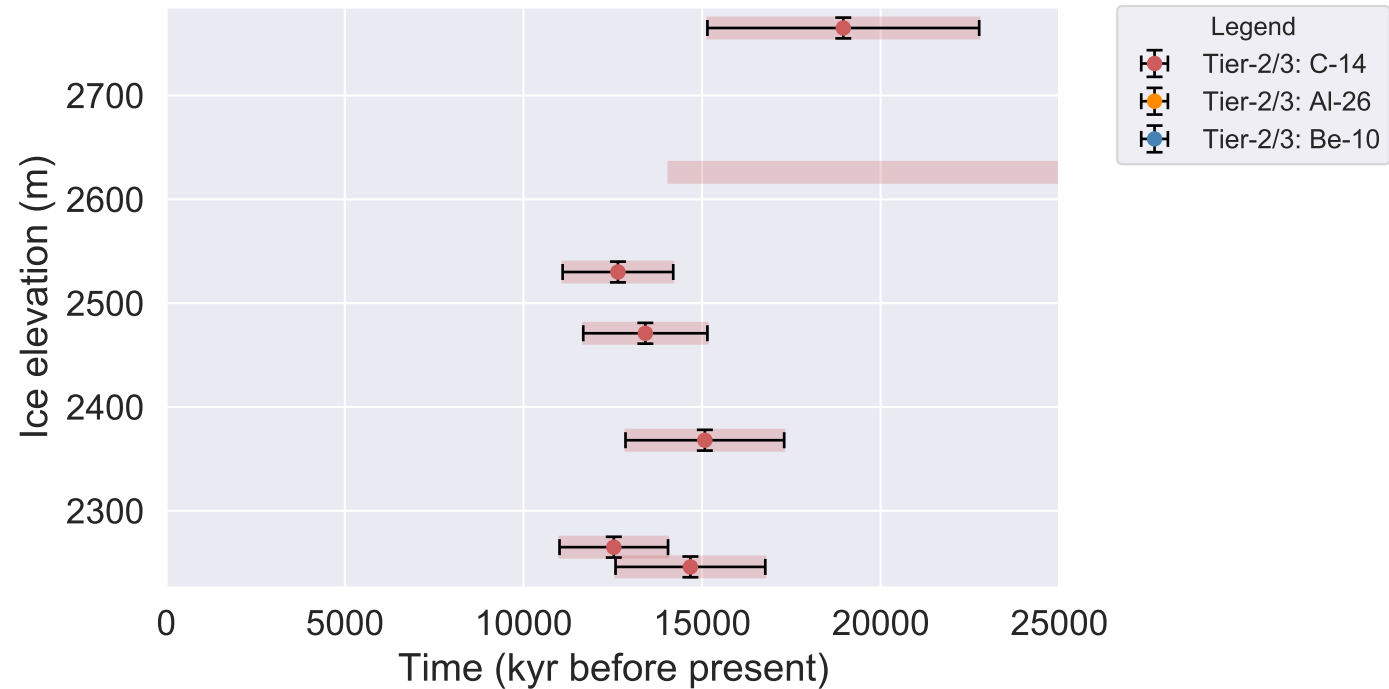

Exposure ages at site: 1435 (Ackert et al., 1999; Ackert et al., 2007)

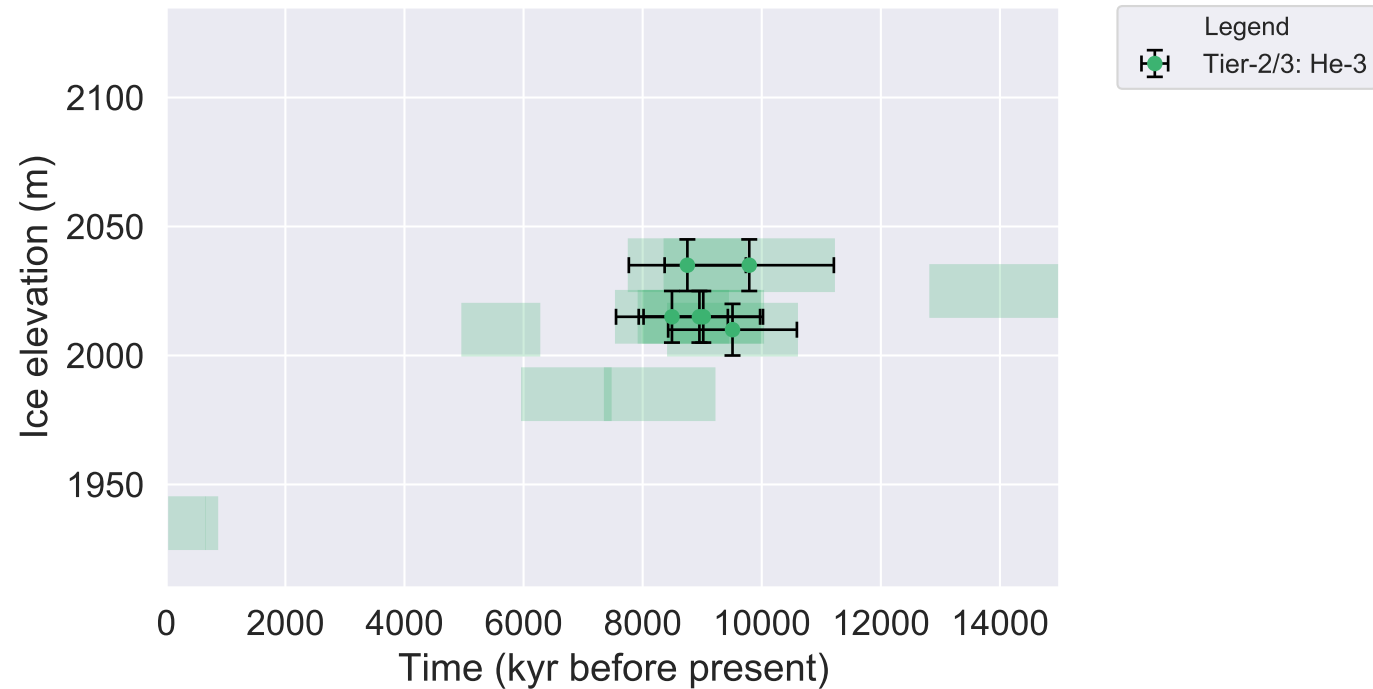

Exposure ages at site: 1501 (Stone et al., 2003; Ackert et al., 2007)

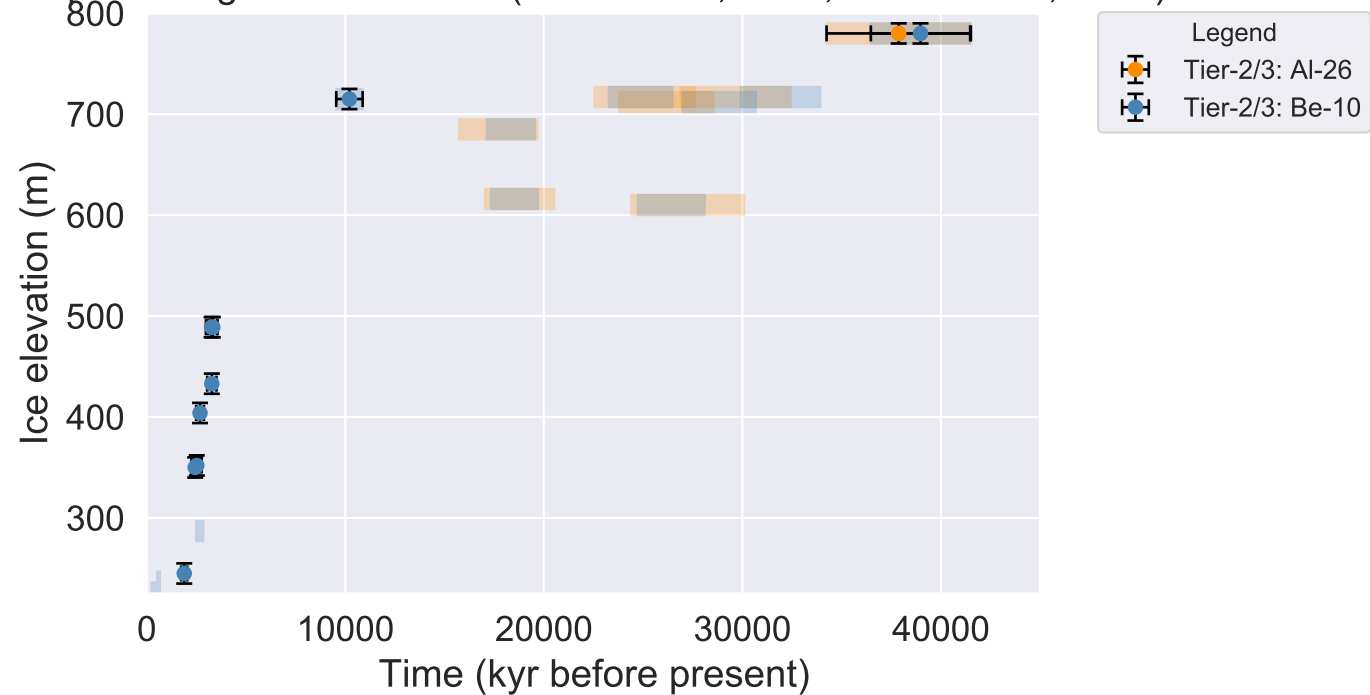

Exposure ages at site: 1502 (Stone et al., 2003; Ackert et al., 2007)

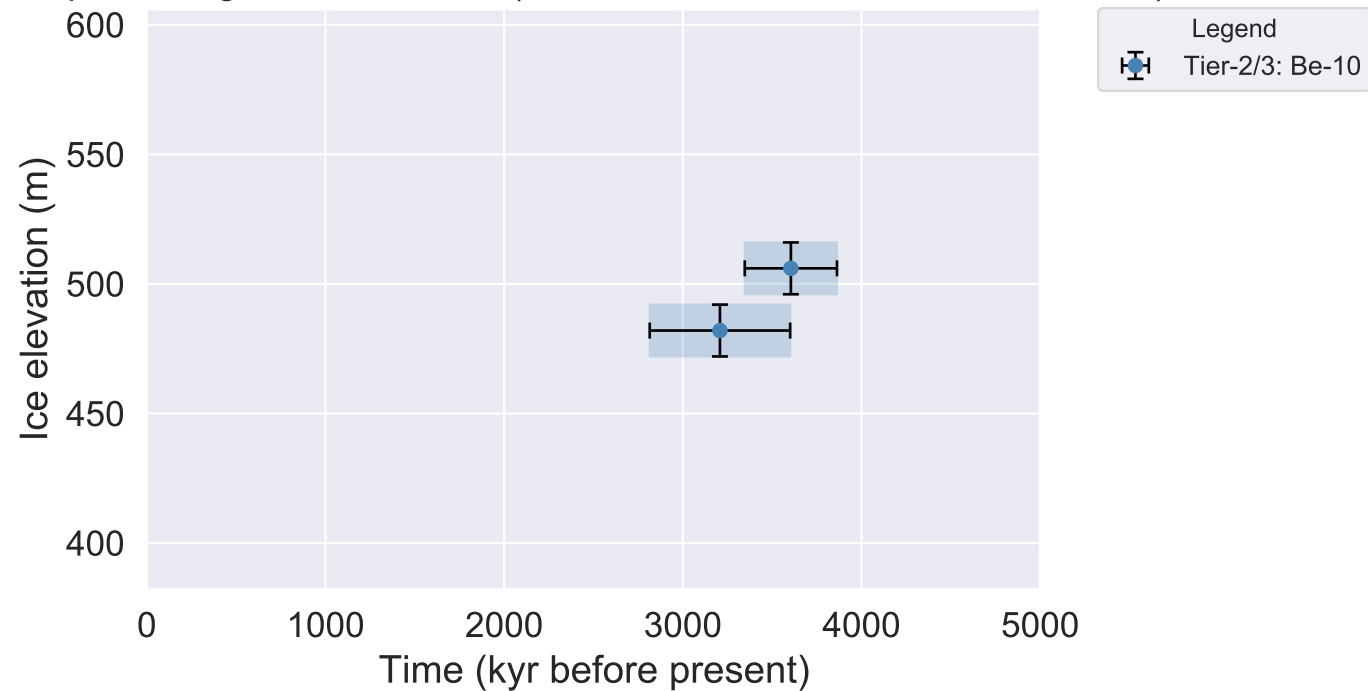

Exposure ages at site: 1503 (Stone et al., 2003; Ackert et al., 2007)

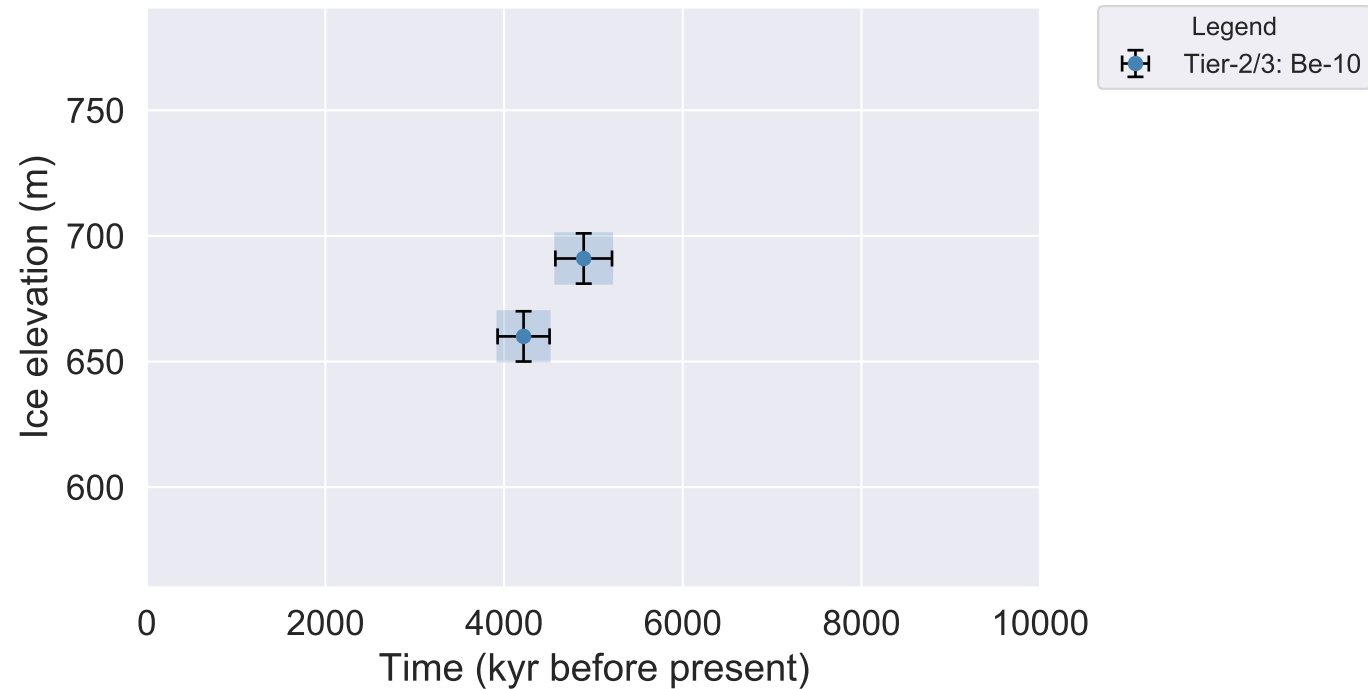

Exposure ages at site: 1504 (Stone et al., 2003; Ackert et al., 2007)

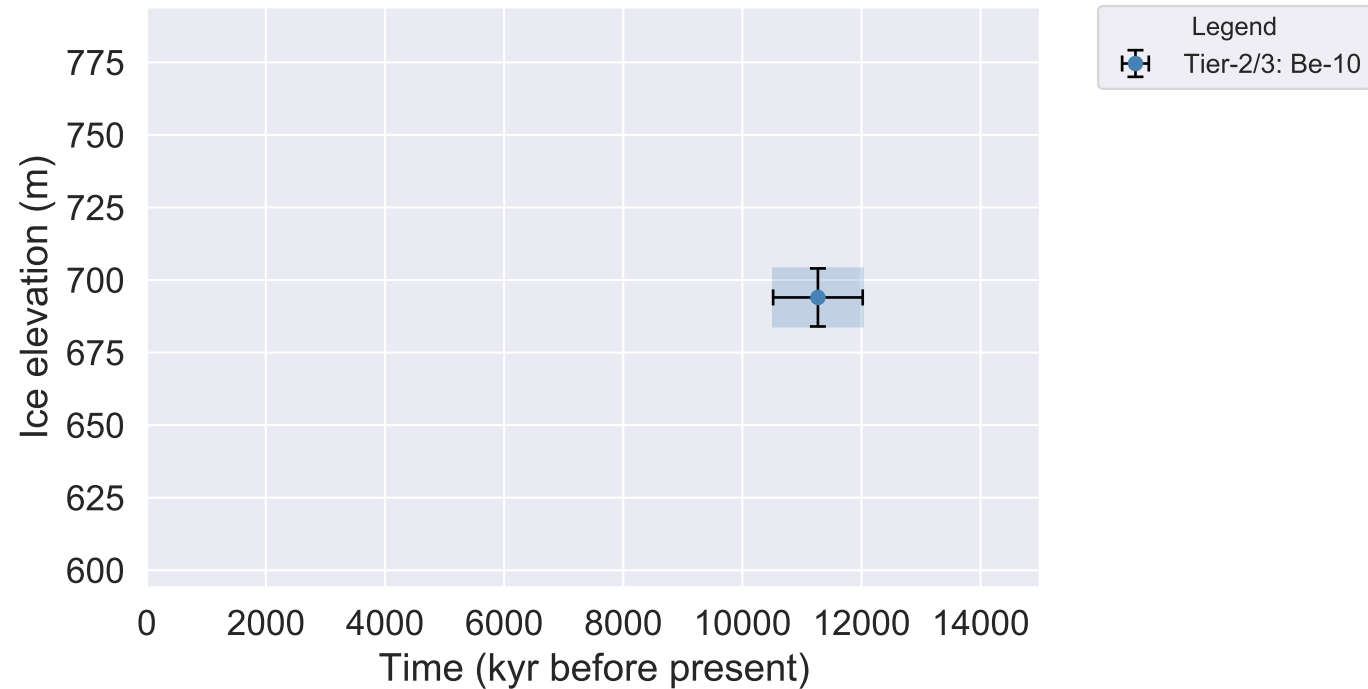

Exposure ages at site: 1505 (Stone et al., 2003; Ackert et al., 2007)

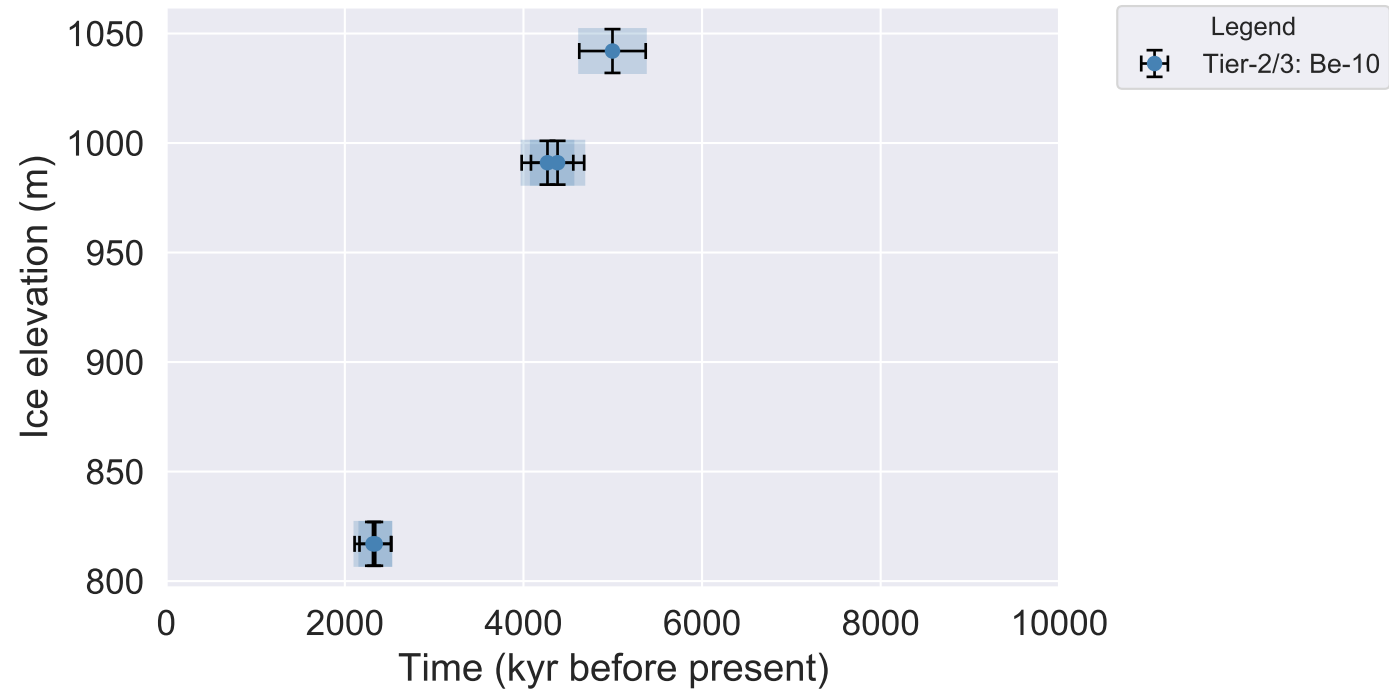

# Exposure ages at site: 1506 (unpublished)

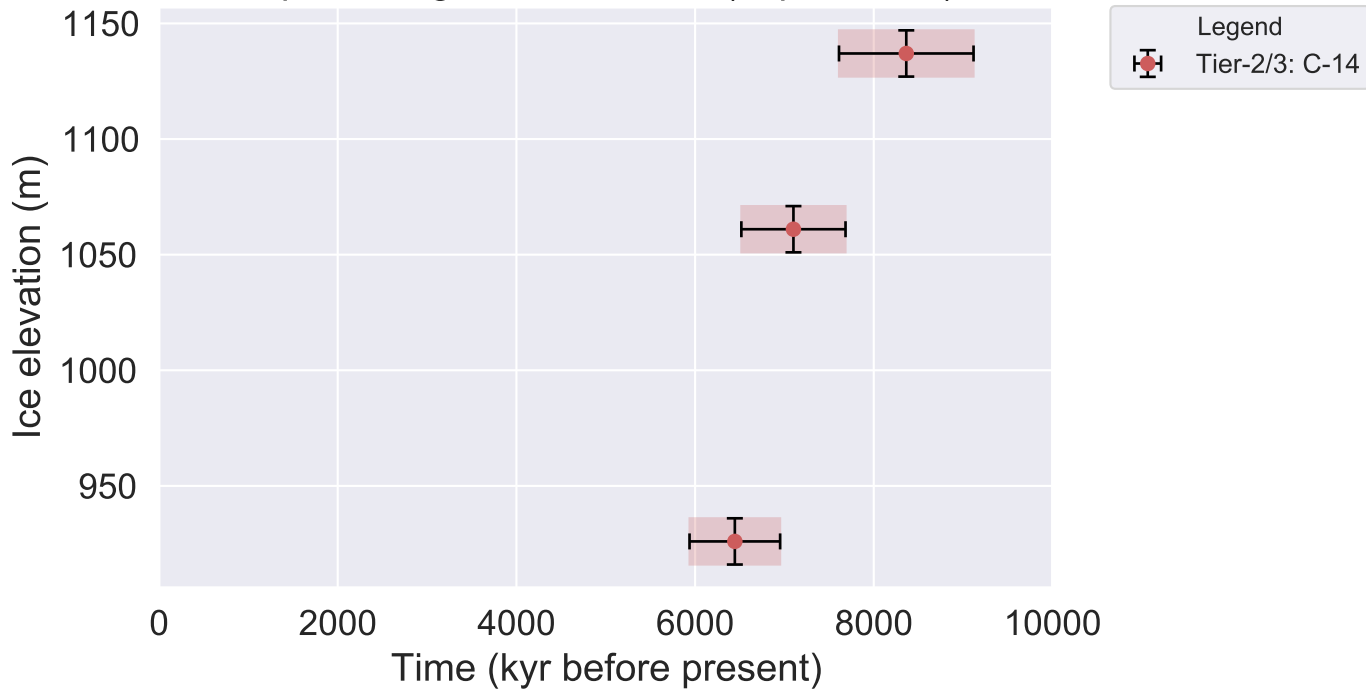

Exposure ages at site: 1507 (Stone et al., 2003; CowderyThesis et al., 0)

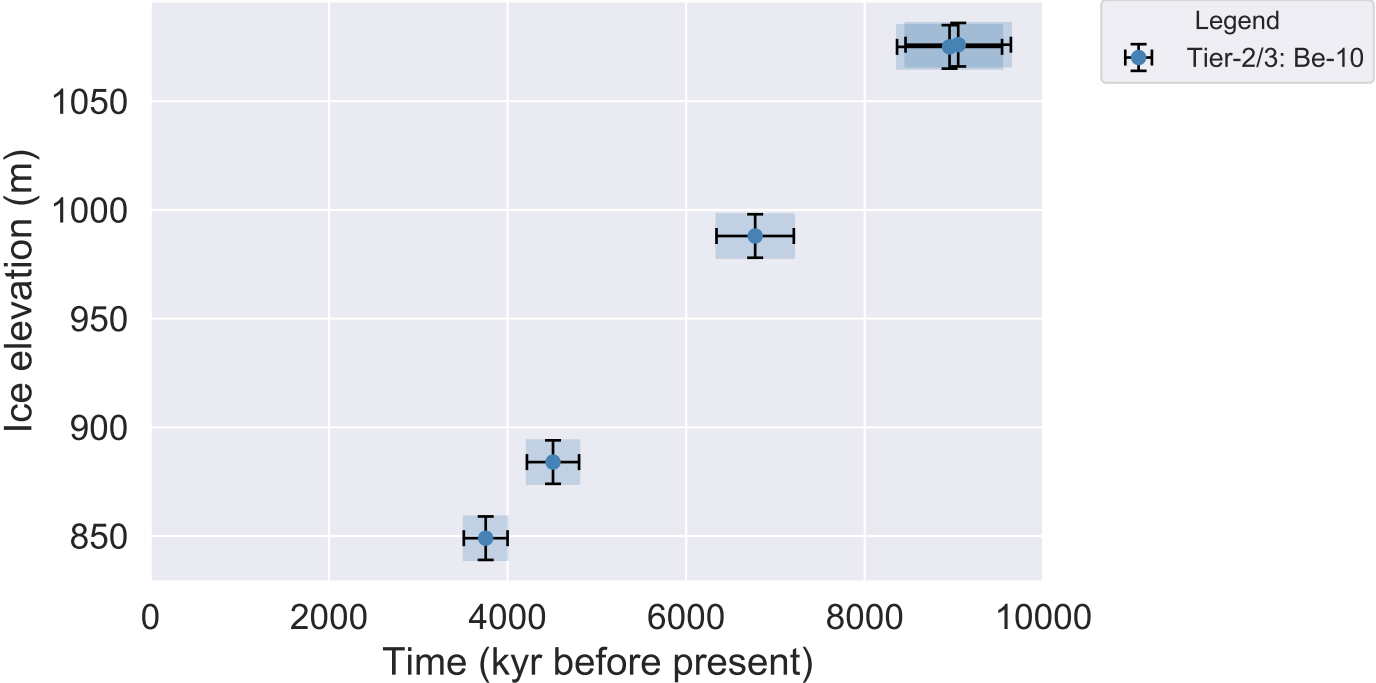

Exposure ages at site: 1508 (Stone et al., 2003; CowderyThesis et al., 0)

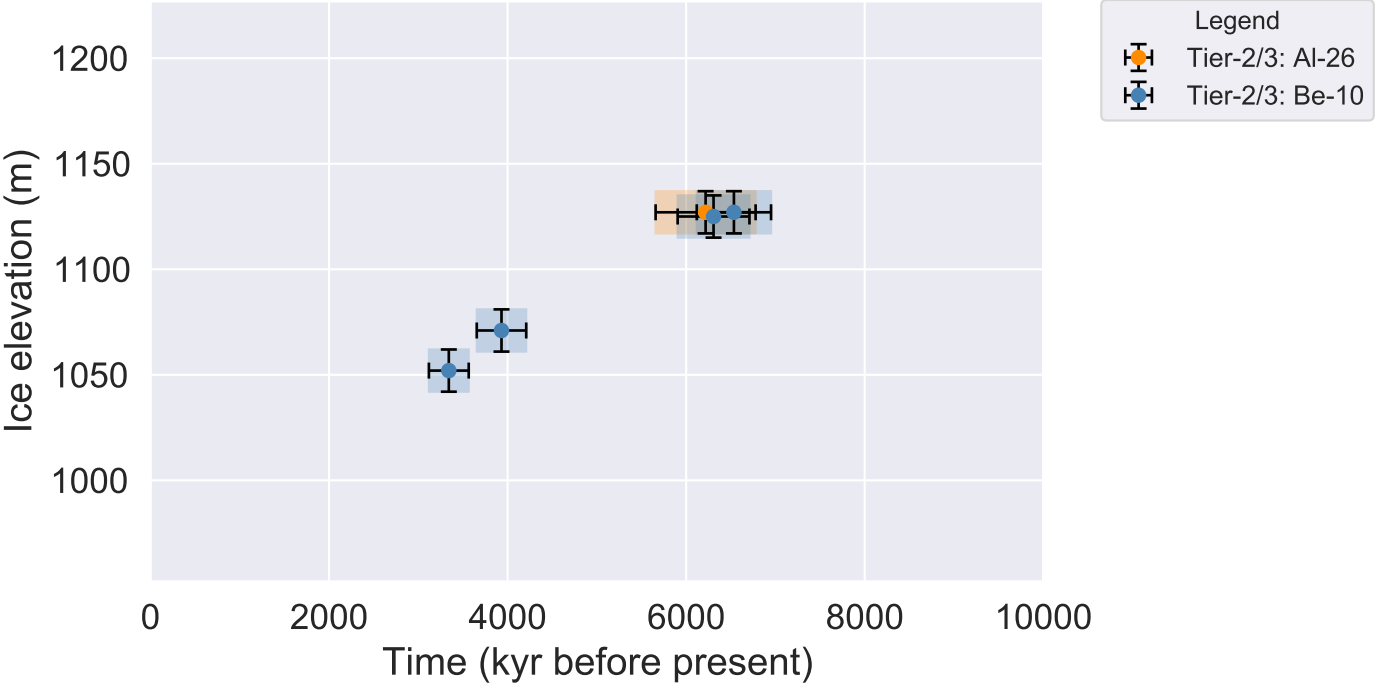

Exposure ages at site: 1509 (Johnson et al., 2017; CowderyThesis et al., 0)

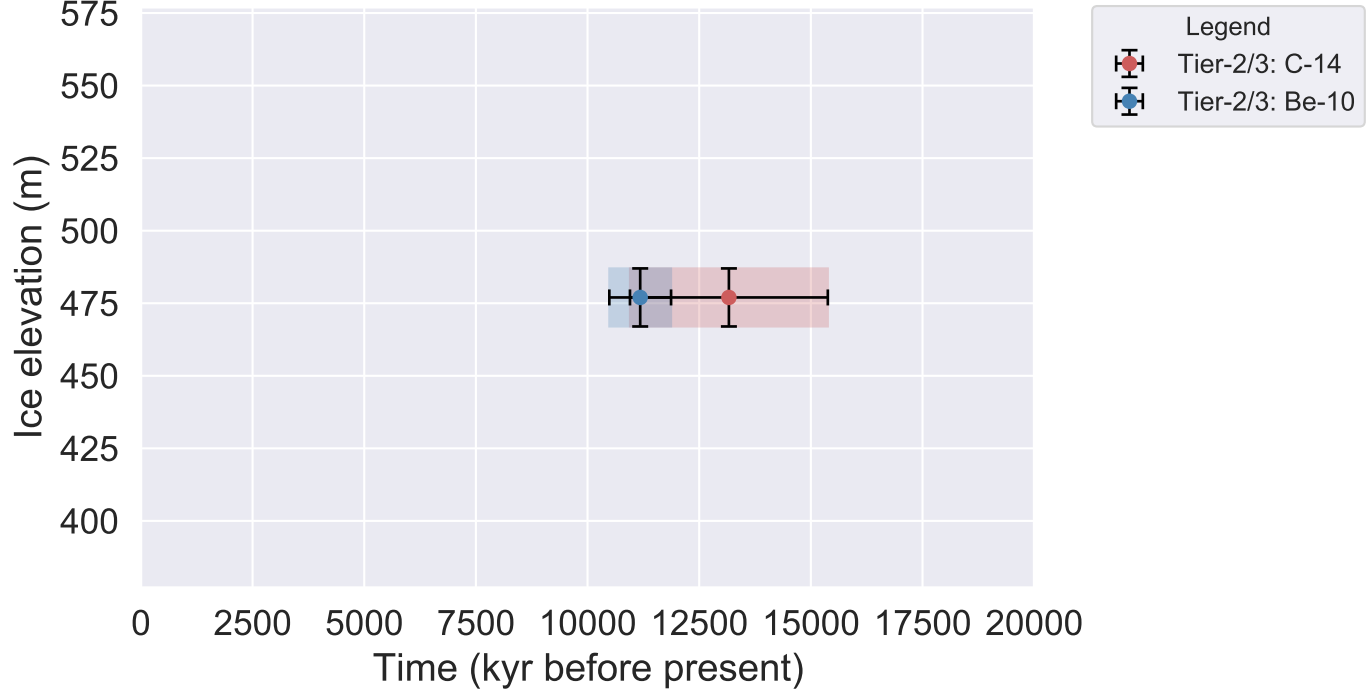

Exposure ages at site: 1510 (Johnson et al., 2020; Johnson et al., 2008)

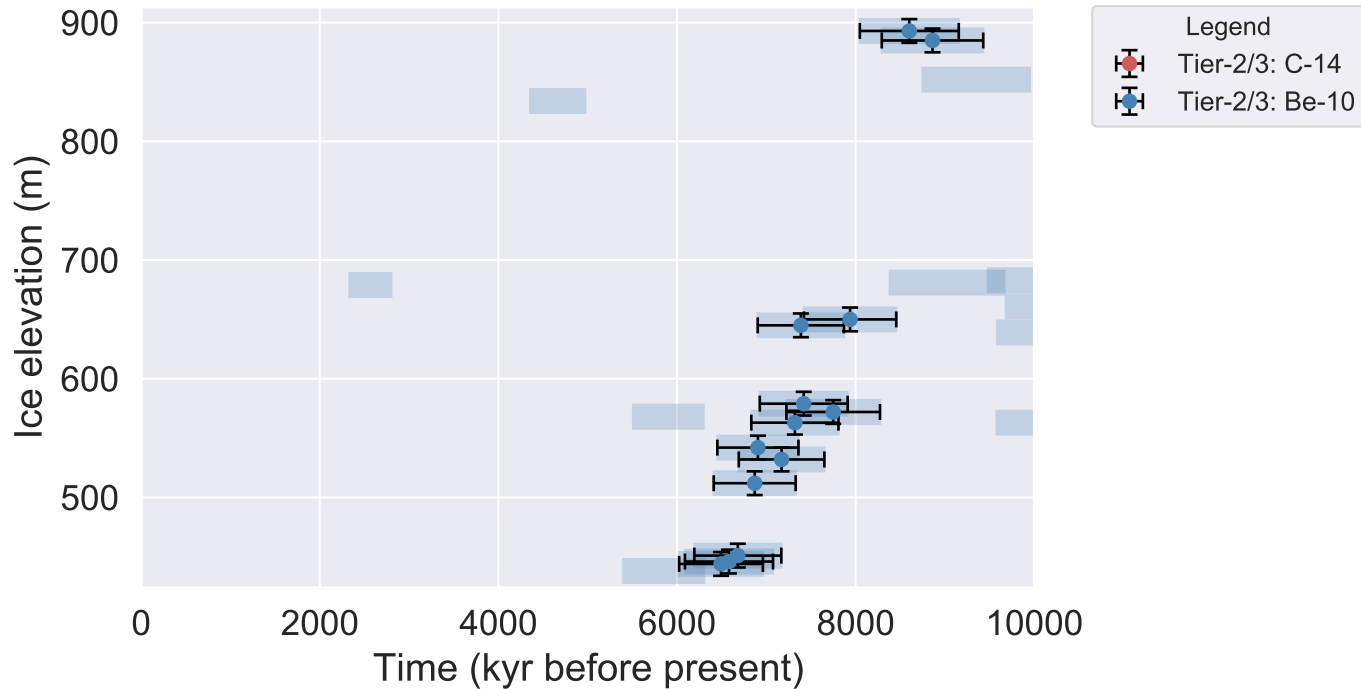

Exposure ages at site: 1511 (Johnson et al., 2020; Johnson et al., 2008)

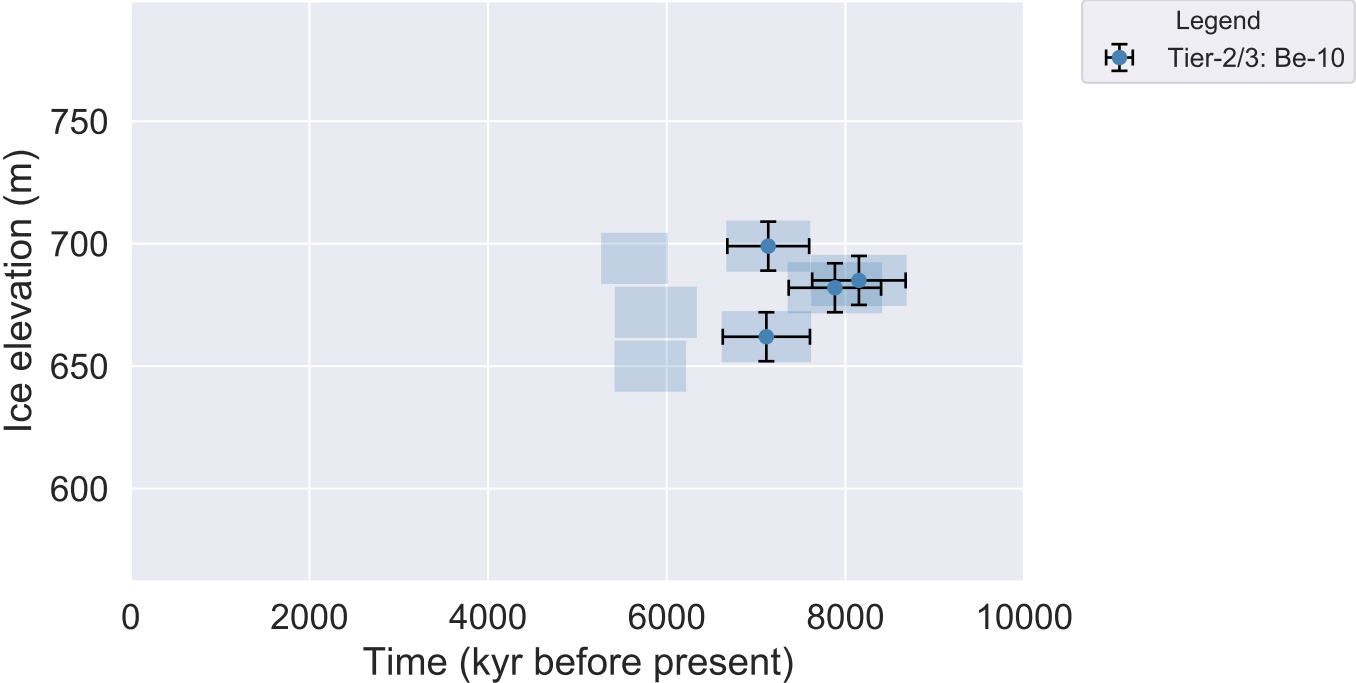

Exposure ages at site: 1512 (Johnson et al., 2014)

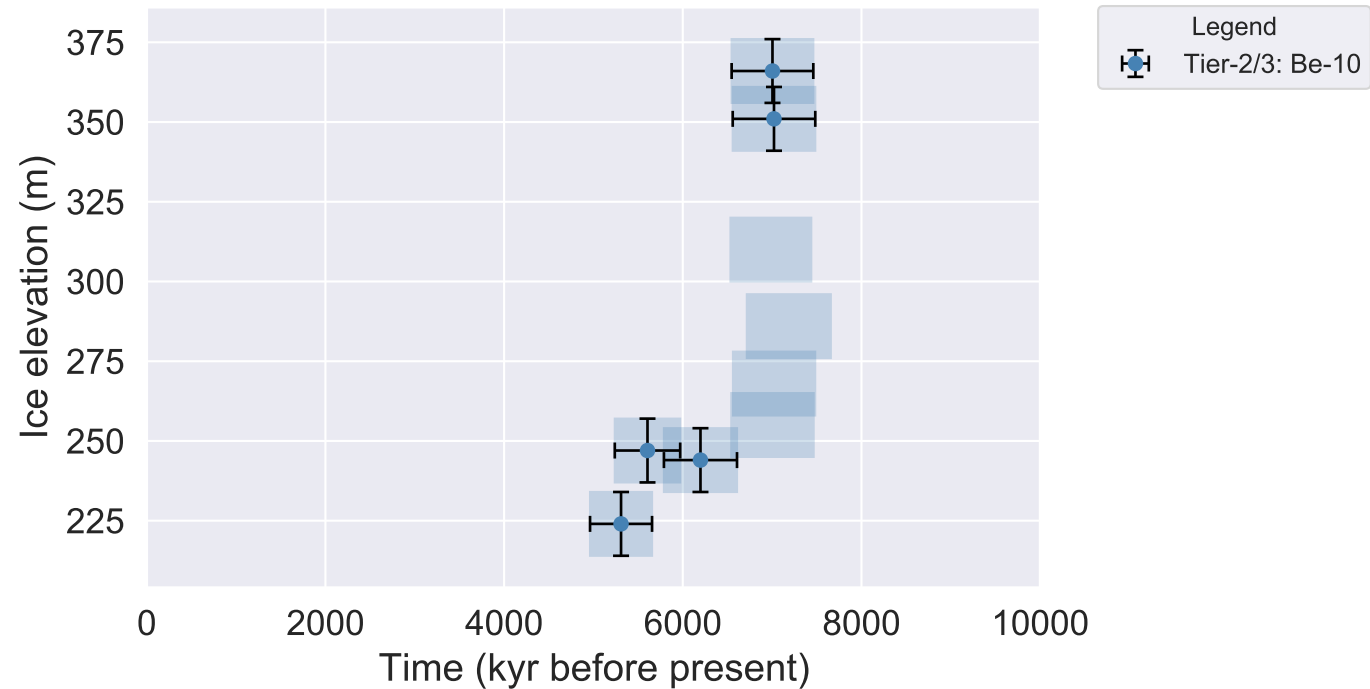

Exposure ages at site: 1601 (Bentley et al., 2011; Hodgson et al., 2009; Bentley et al., 2006)

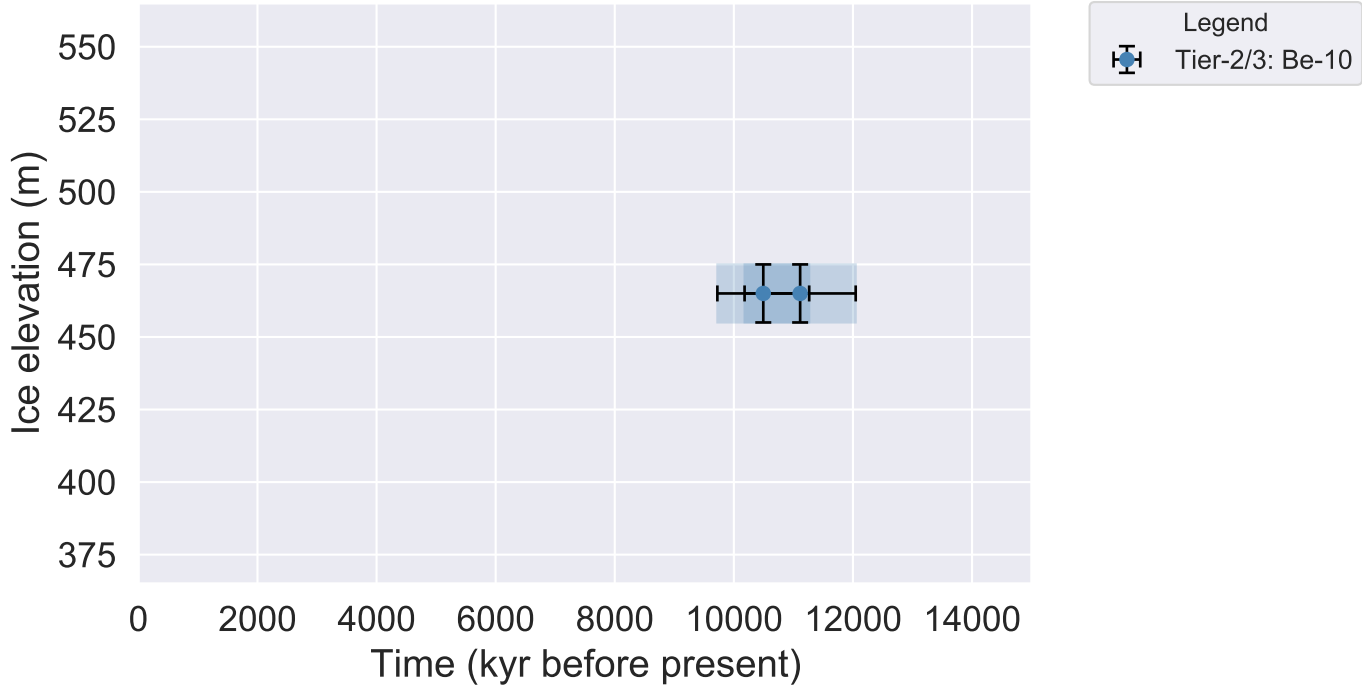

Exposure ages at site: 1602 (Bentley et al., 2011; Hodgson et al., 2009; Bentley et al., 2006)

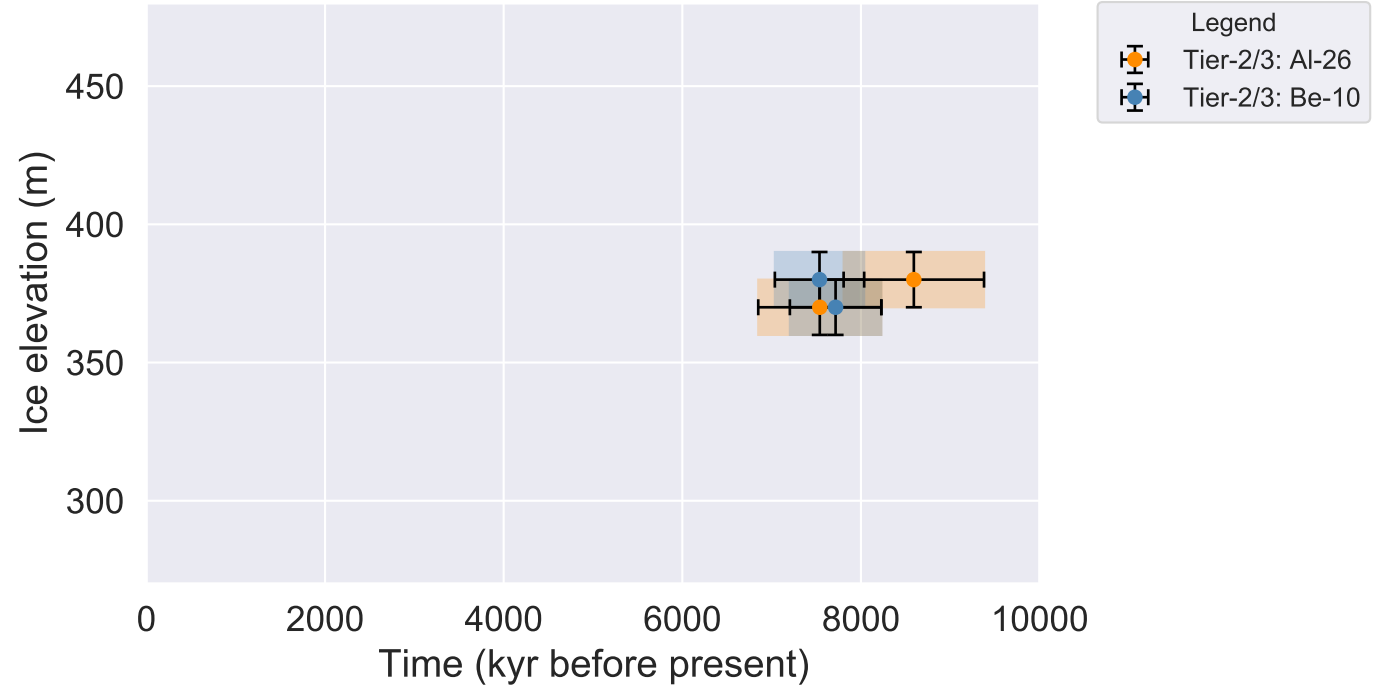

# Exposure ages at site: 1603 (Bentley et al., 2006)

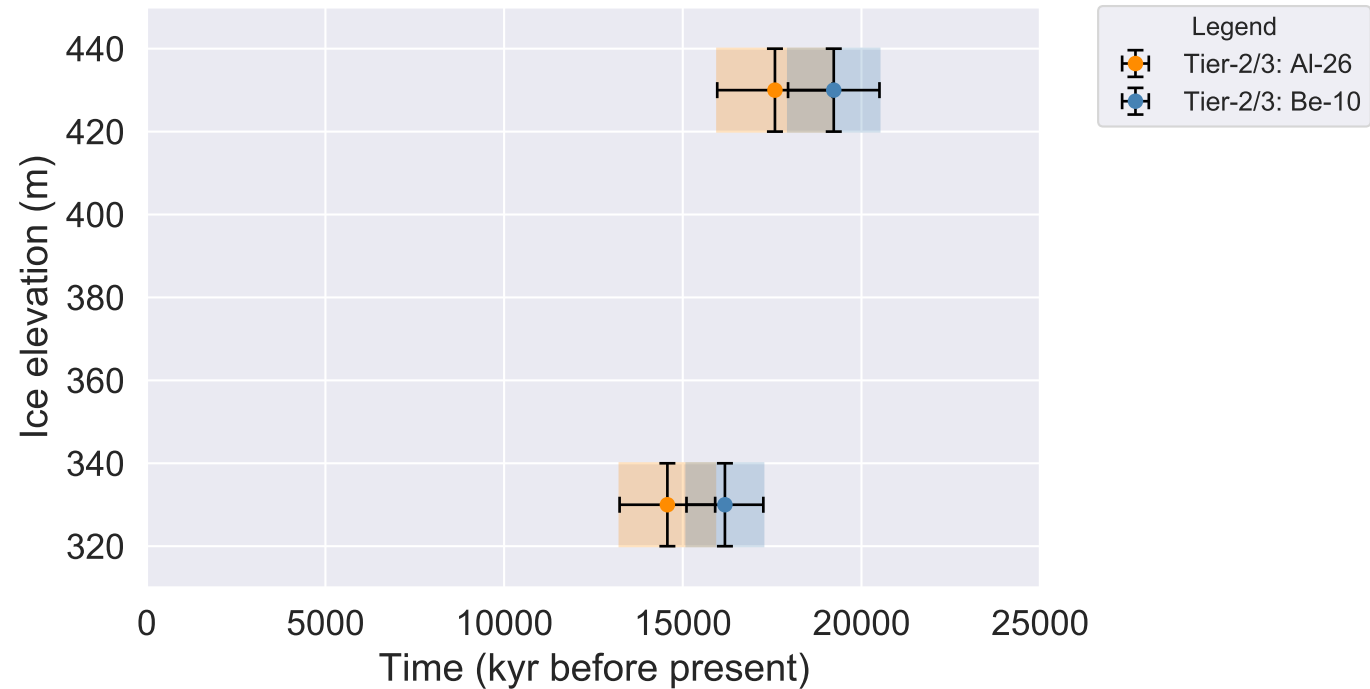

# Exposure ages at site: 1604 (Johnson et al., 2012)

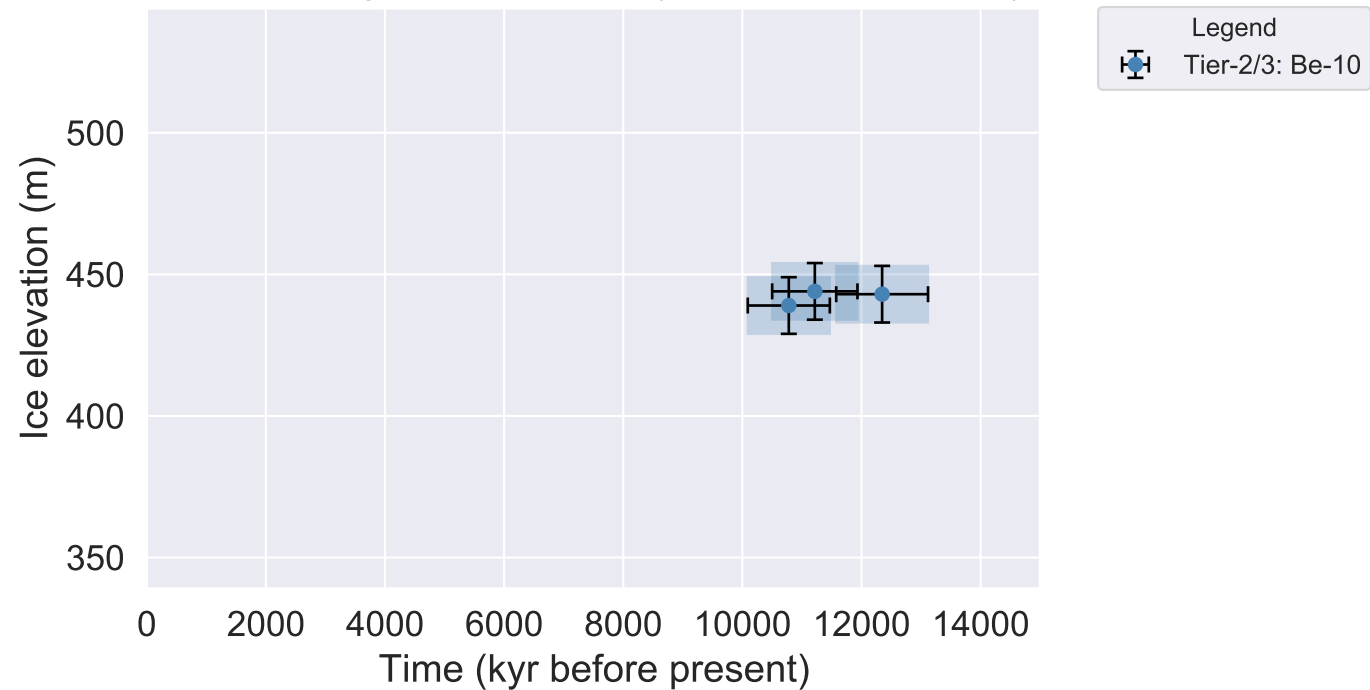

Exposure ages at site: 1605 (Johnson et al., 2012)

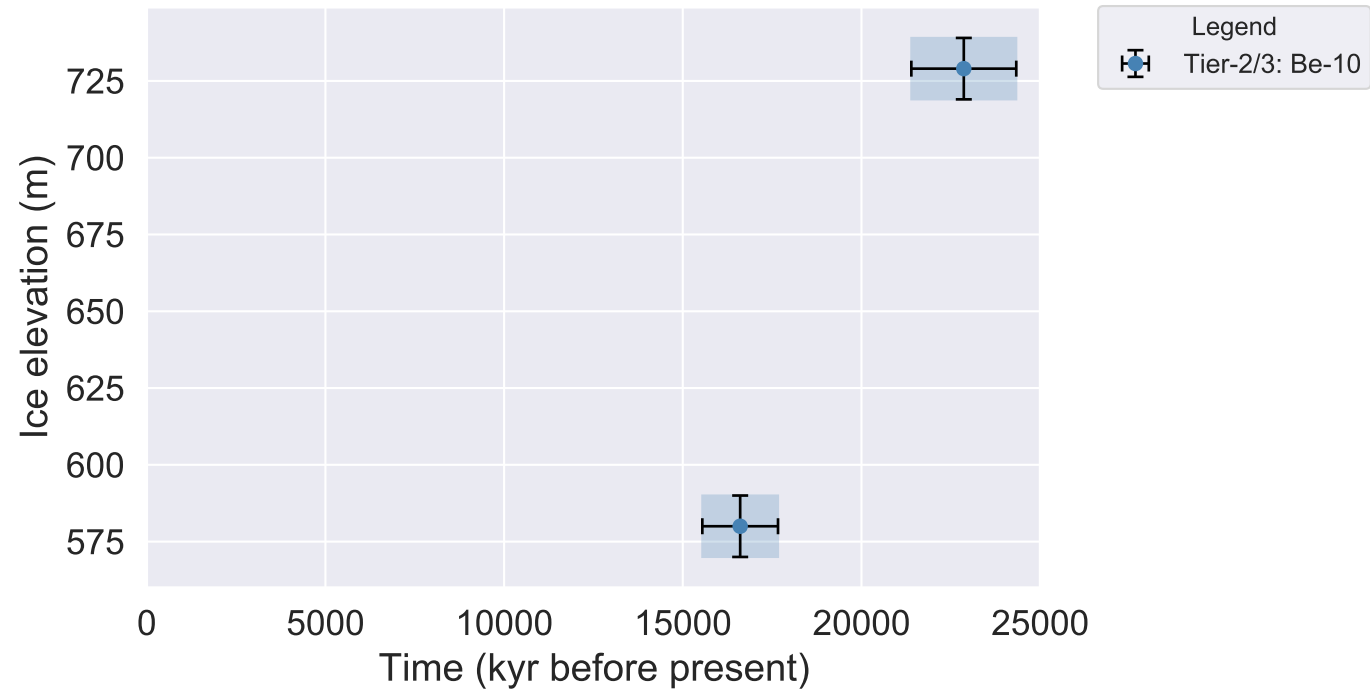

# Exposure ages at site: 1606 (Ciner et al., 2019)

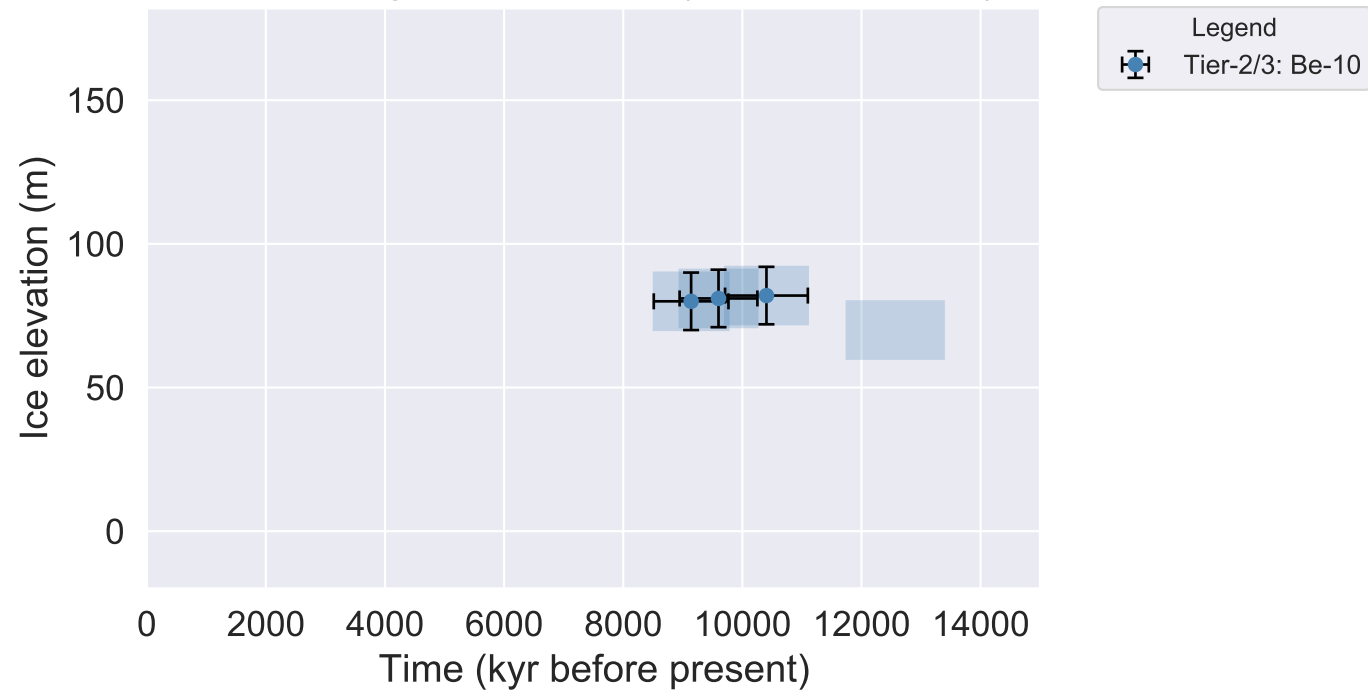

# Exposure ages at site: 1607 (Bentley et al., 2011)

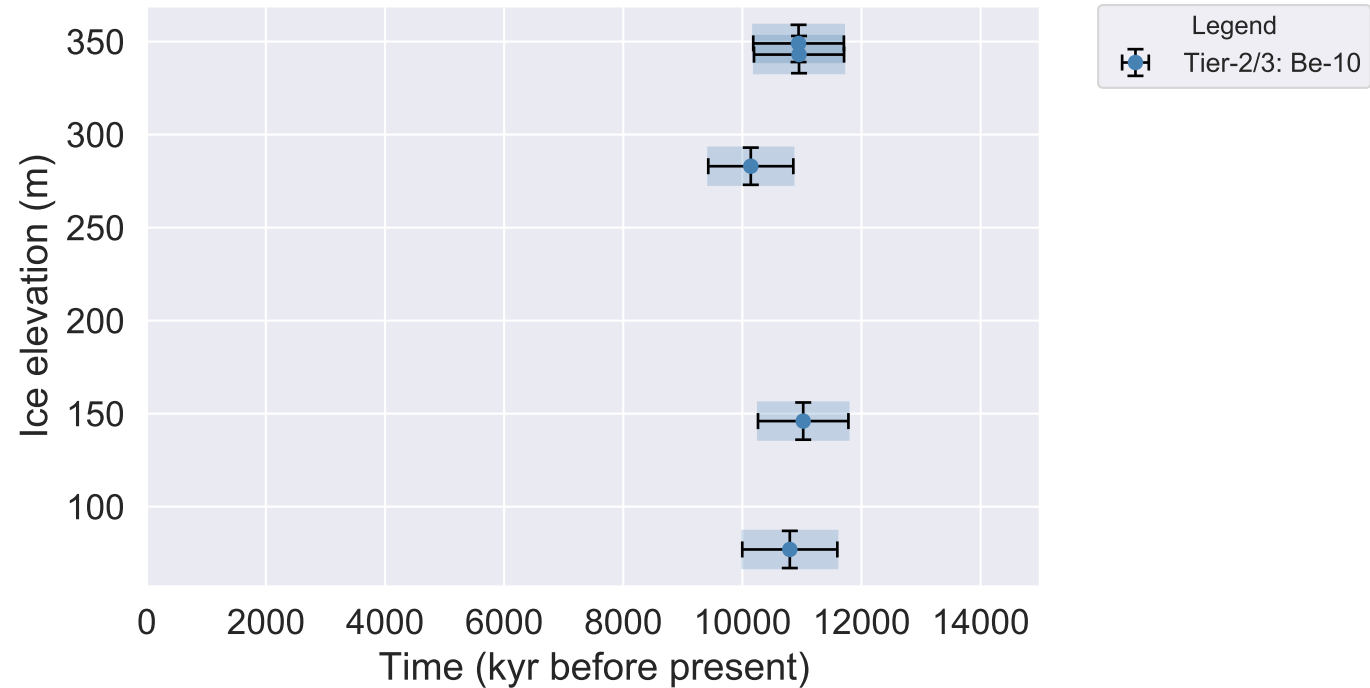

# Exposure ages at site: 1608 (Bentley et al., 2011)

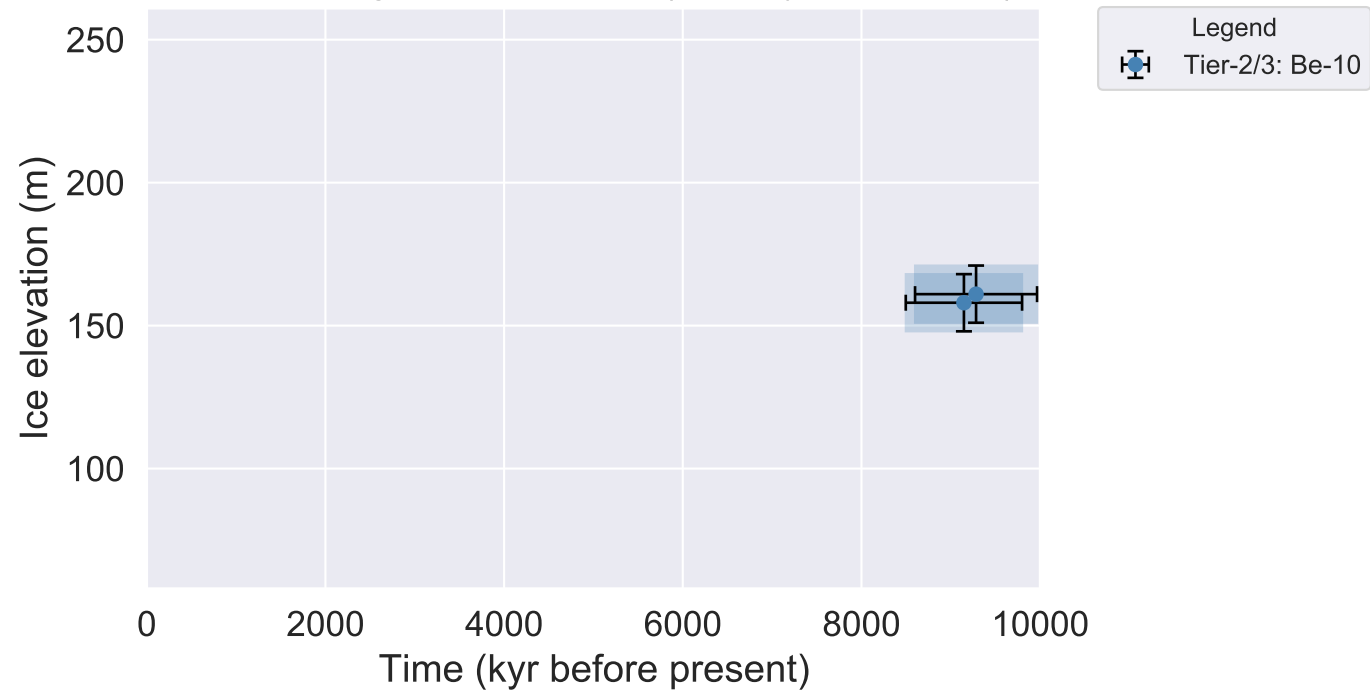

Exposure ages at site: 1609 (Jeong et al., 2018)

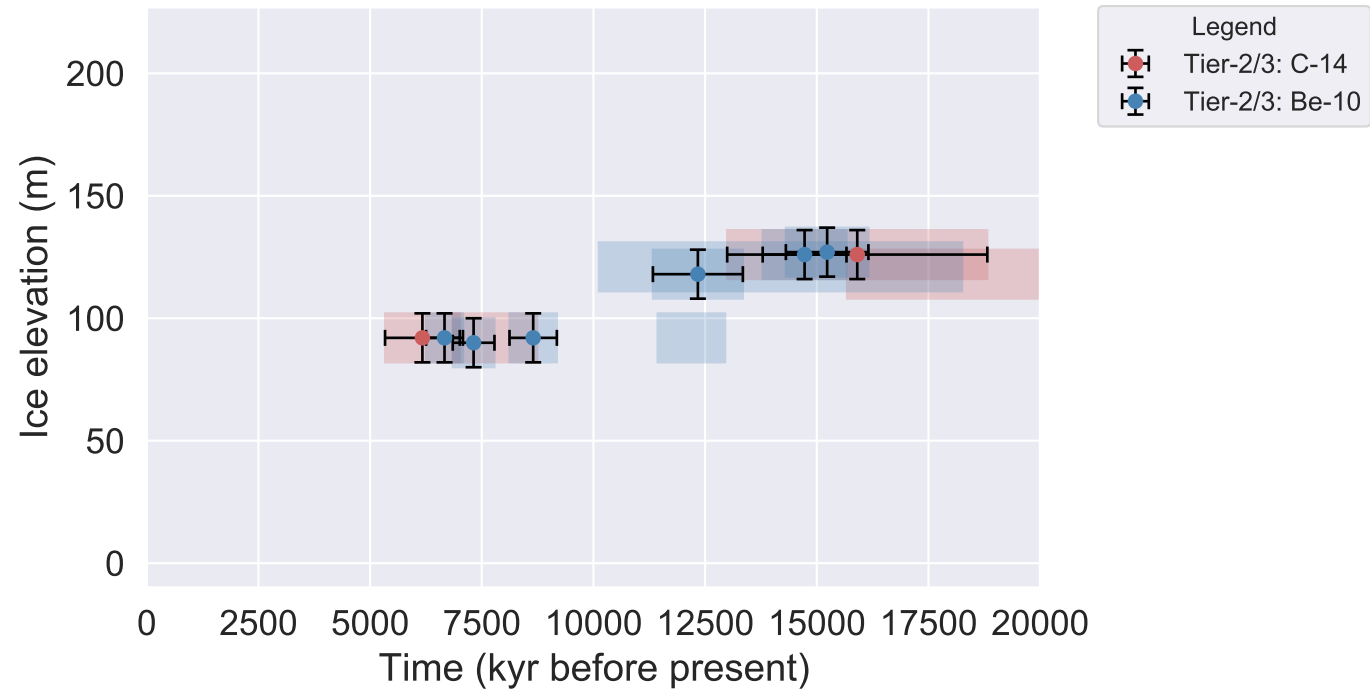

# Exposure ages at site: 1610 (Bentley et al., 2011)

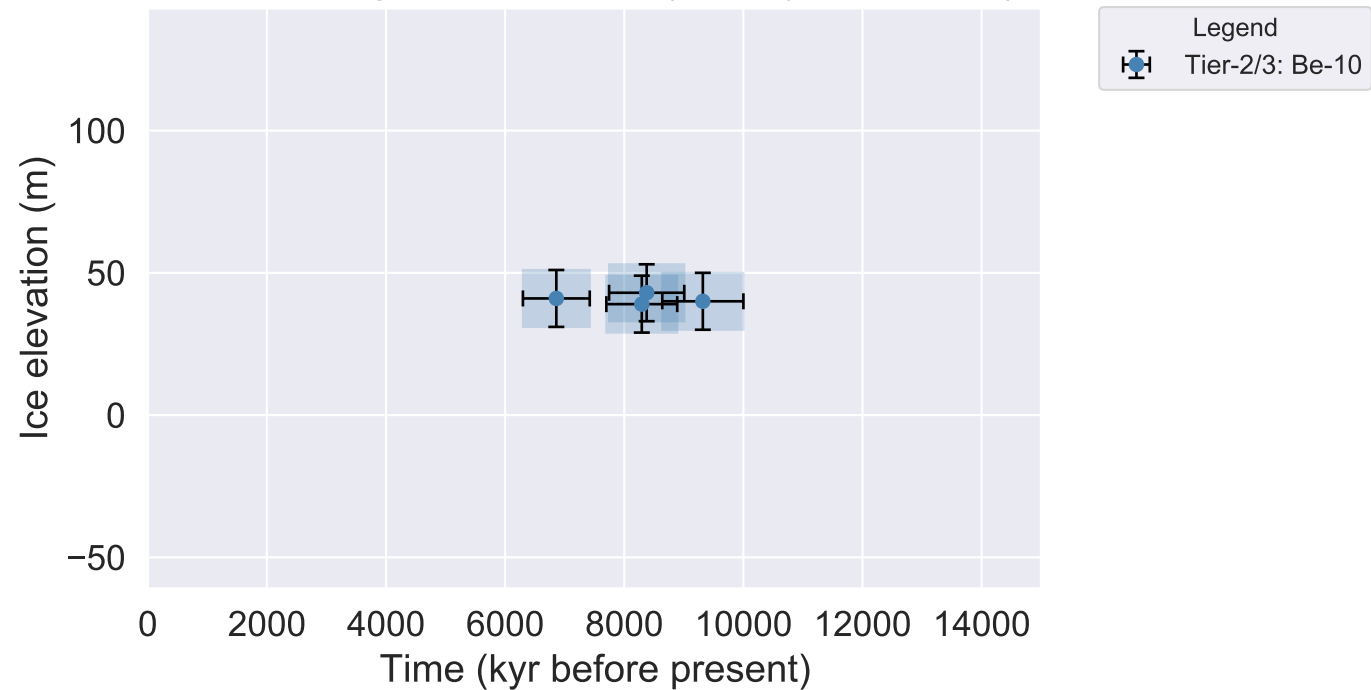

Exposure ages at site: 1611 (Balco et al., 2013)

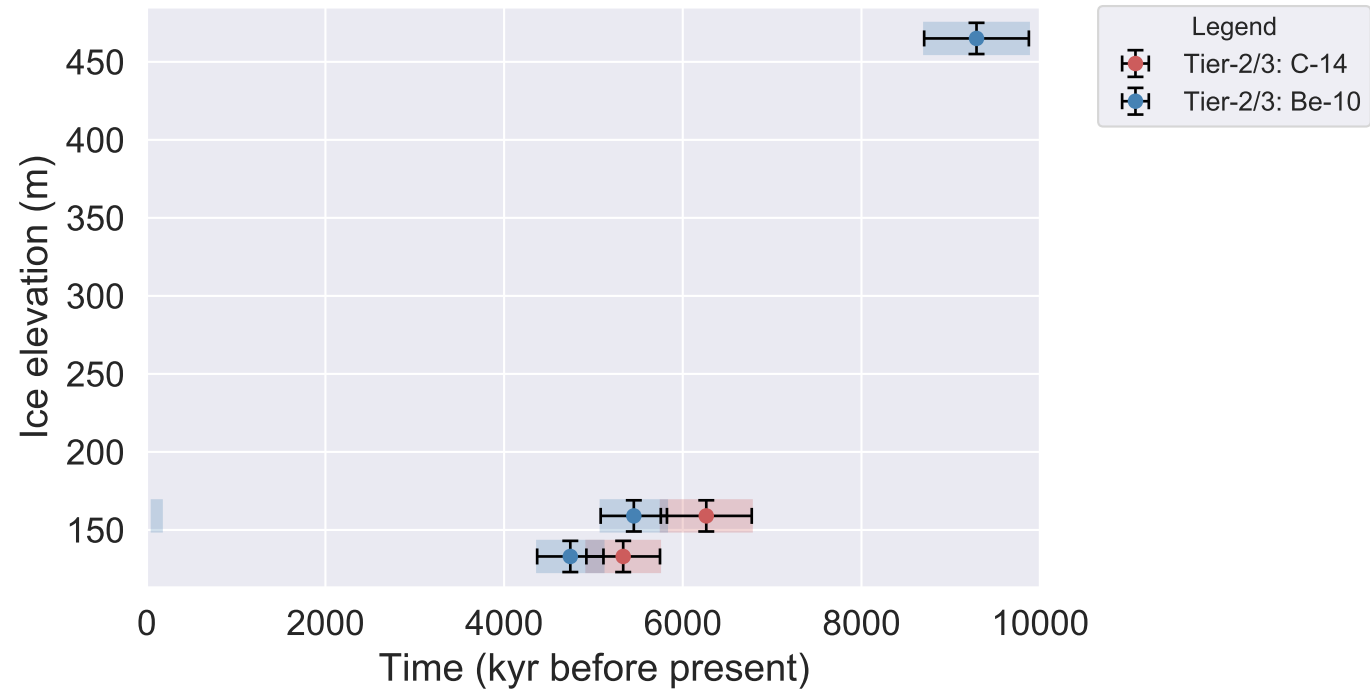

Exposure ages at site: 1612 (Balco et al., 2013)

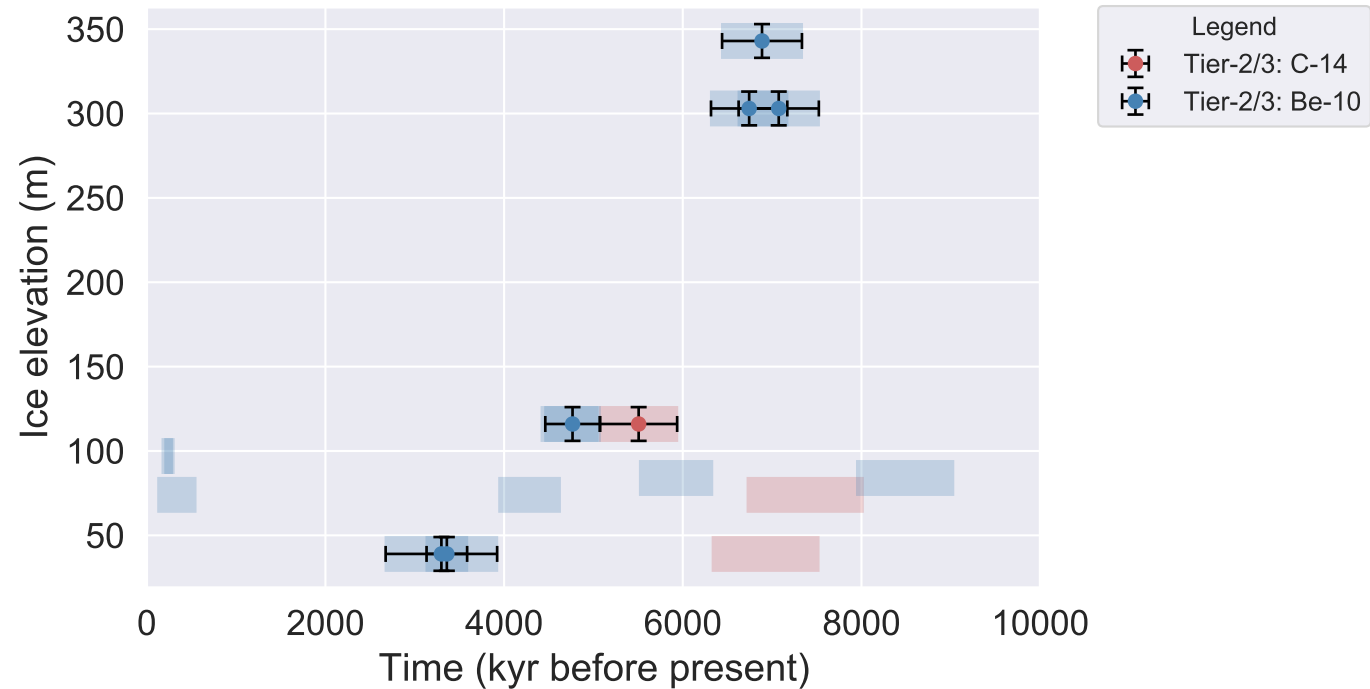

Exposure ages at site: 1613 (Johnson et al., 2009; Kaplan et al., 2020)

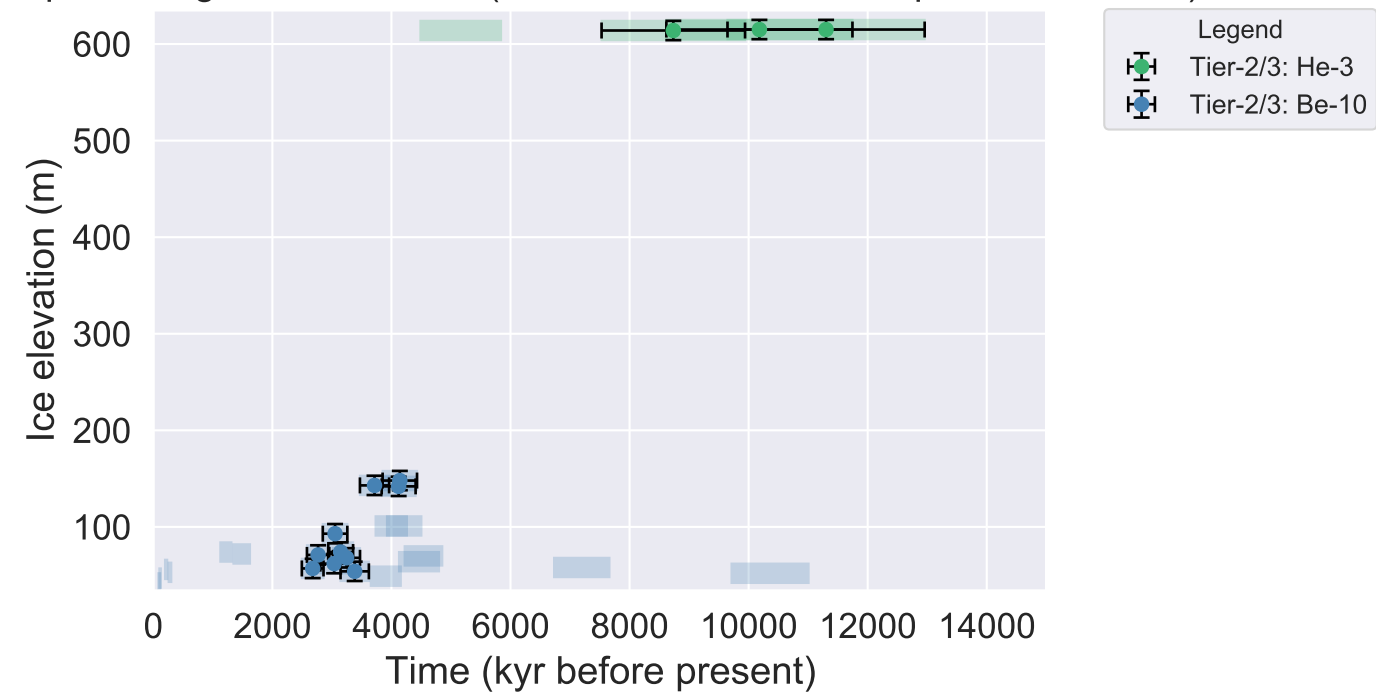

# Exposure ages at site: 1614 (Kaplan et al., 2020)

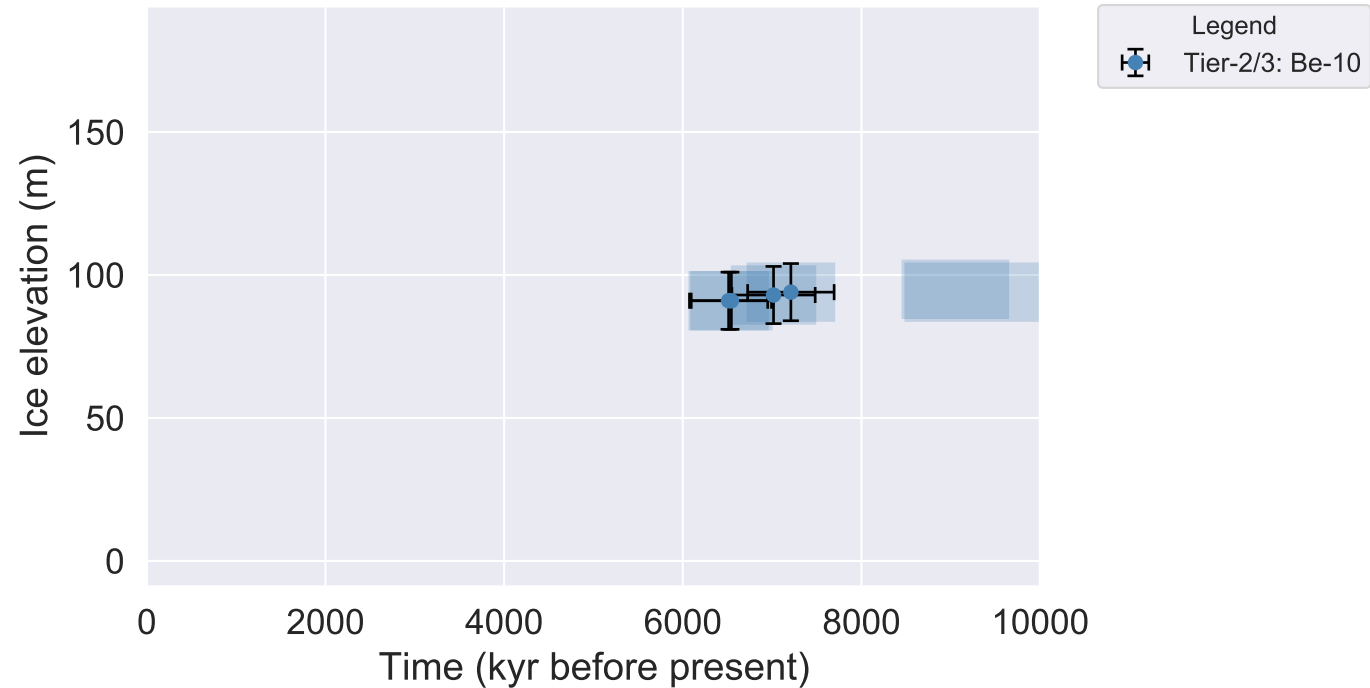

# Exposure ages at site: 1615 (Glasser et al., 2014)

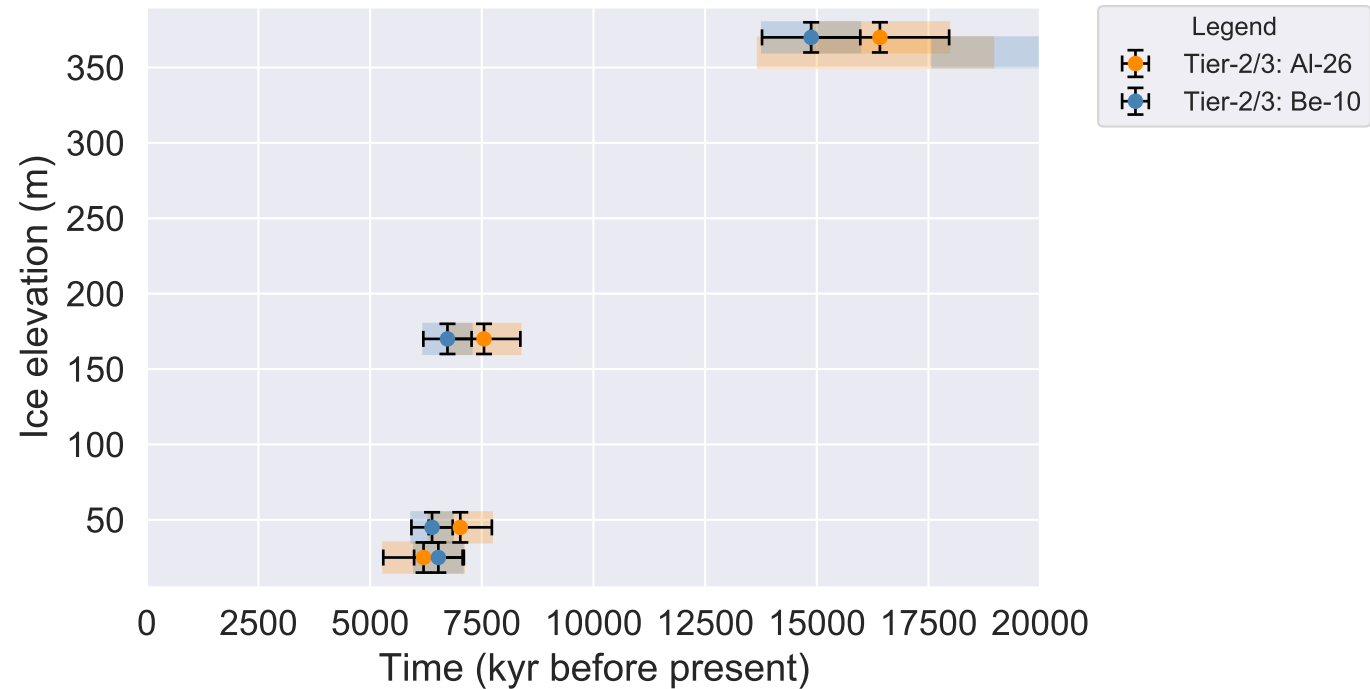

Exposure ages at site: 1616 (Johnson et al., 2011)

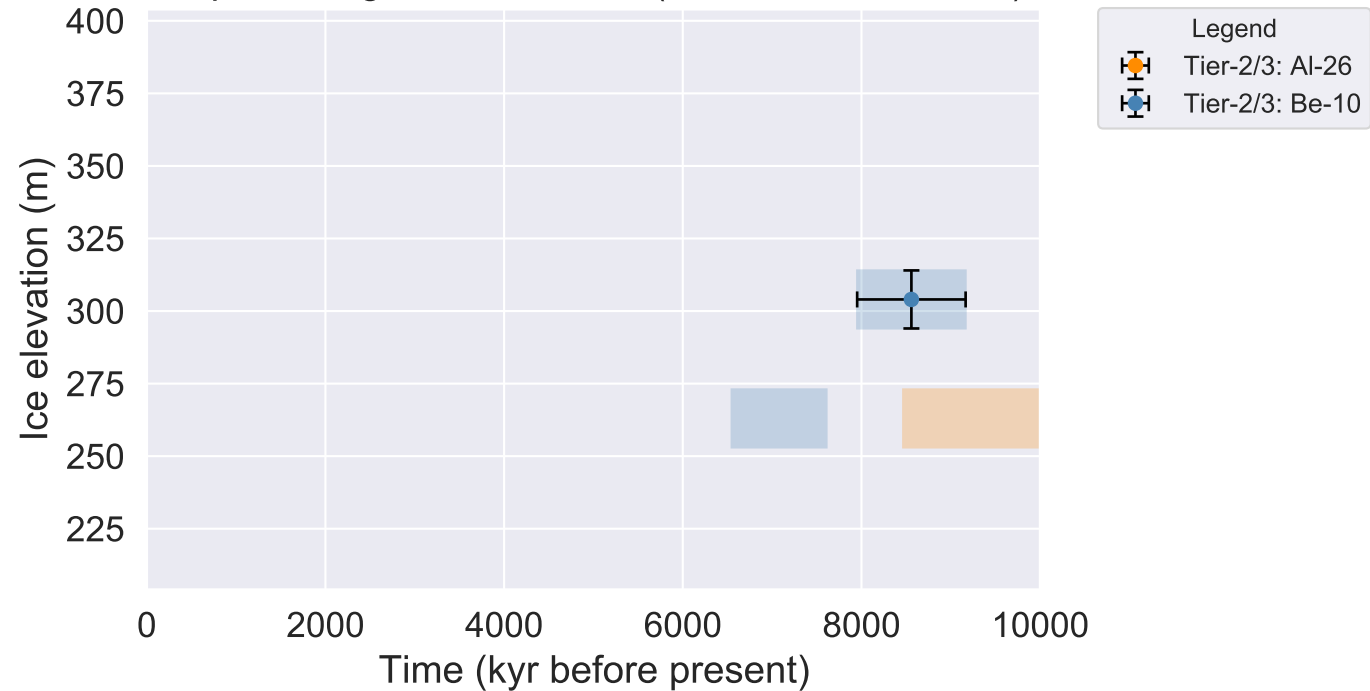

Exposure ages at site: 1617 (Johnson et al., 2011)

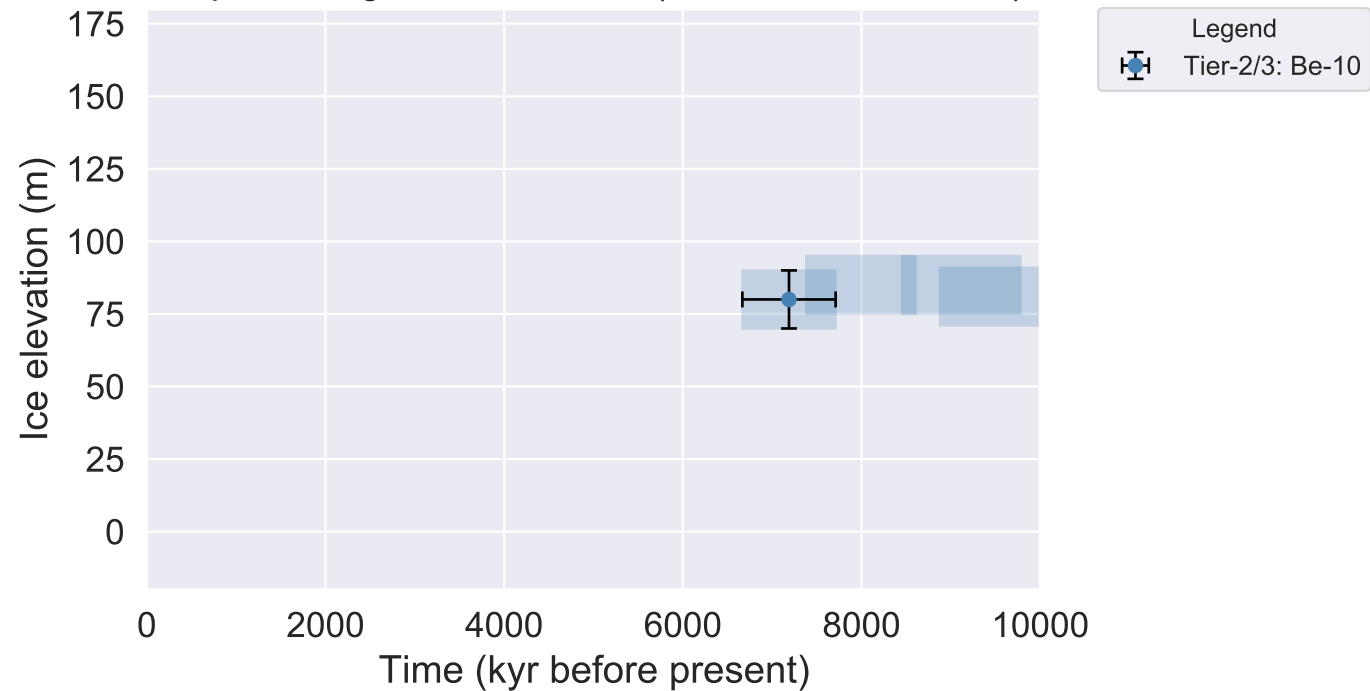

# Exposure ages at site: 1618 (Johnson et al., 2011)

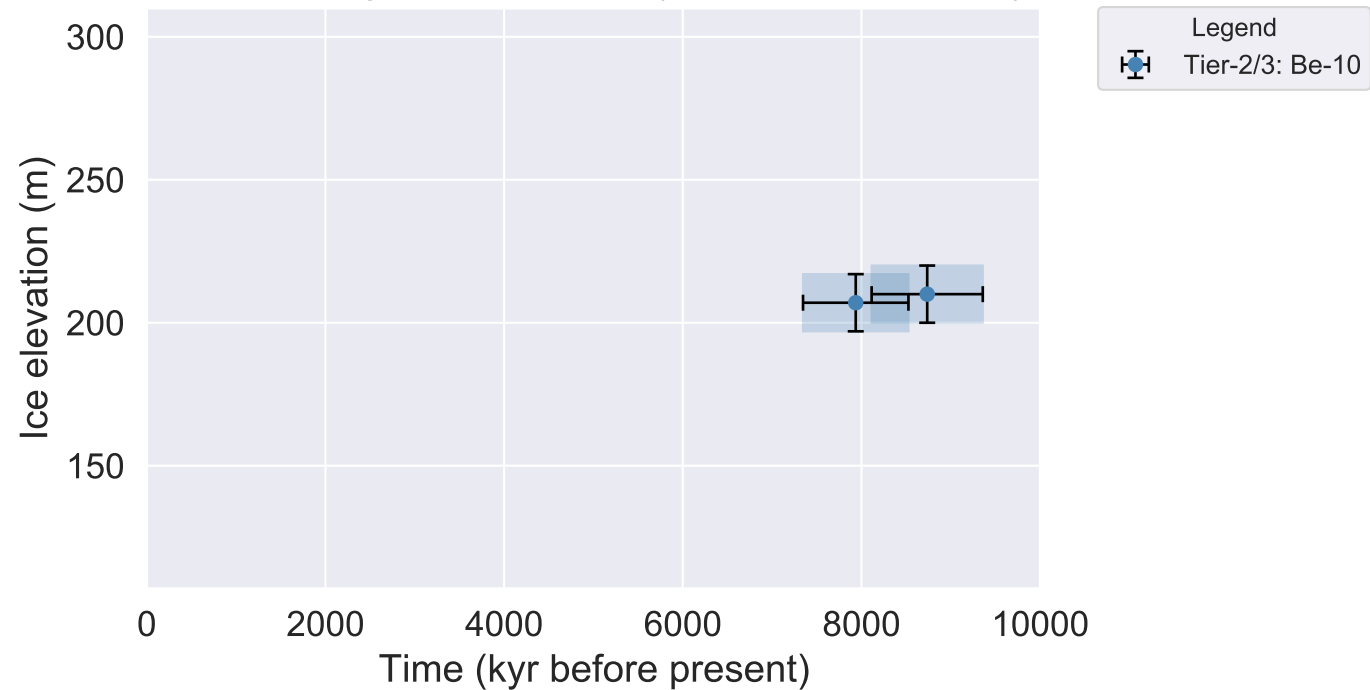

Exposure ages at site: 1701 (Johnson et al., 2019; Nichols et al., 2019)

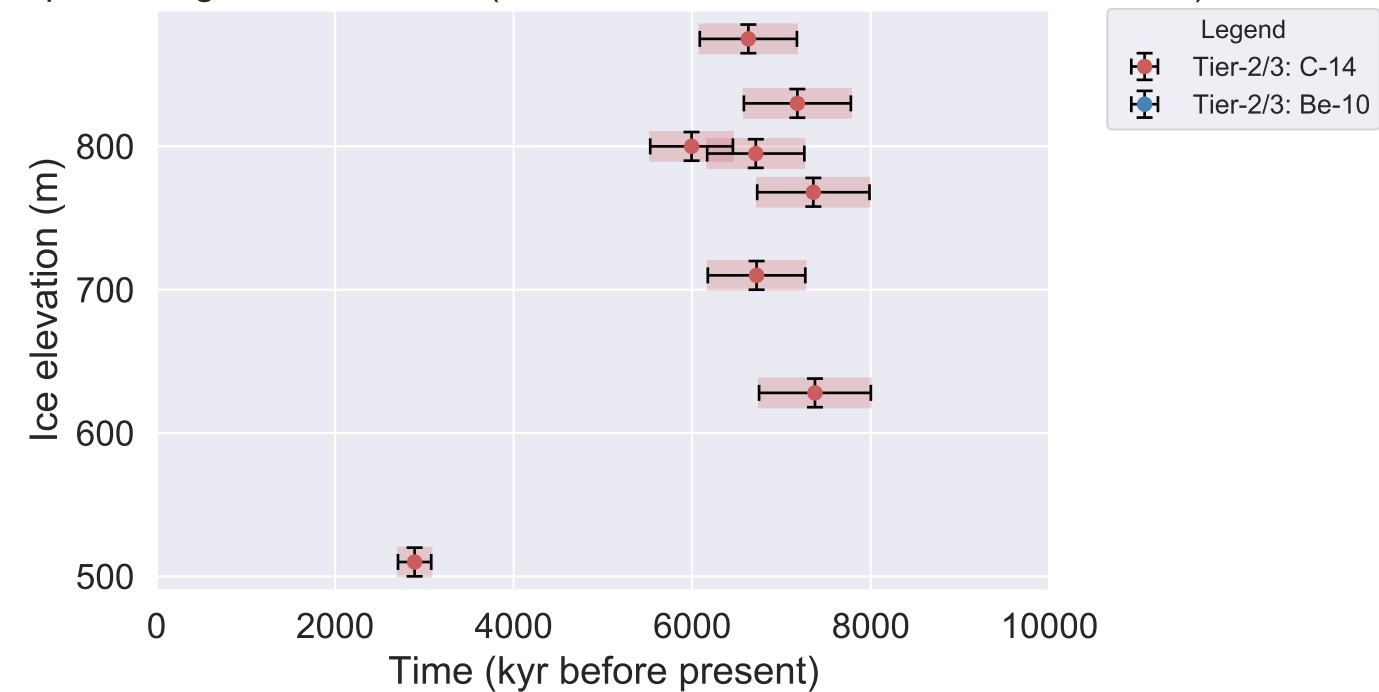

Exposure ages at site: 1702 (Bentley et al., 2006; Nichols et al., 2019)

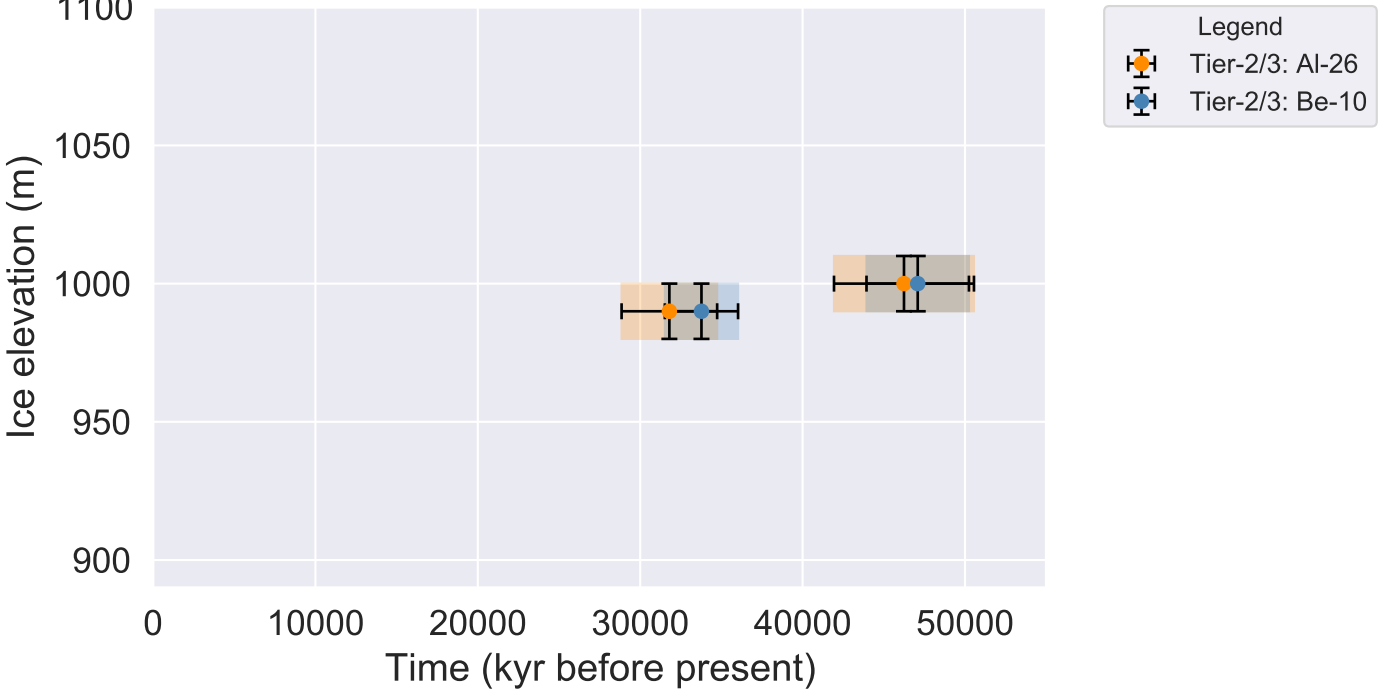

Exposure ages at site: 1703 (Bentley et al., 2006; Nichols et al., 2019)

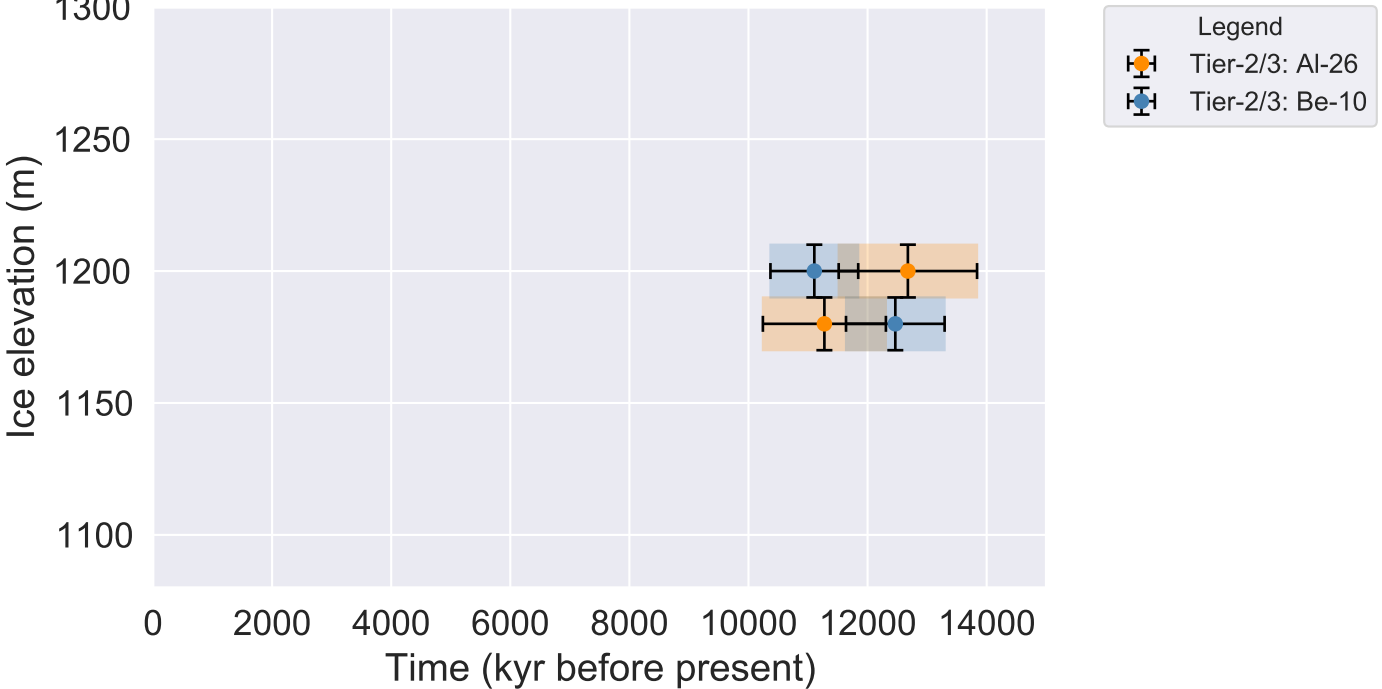

Exposure ages at site: 1704 (Bentley et al., 2010; Nichols et al., 2019)

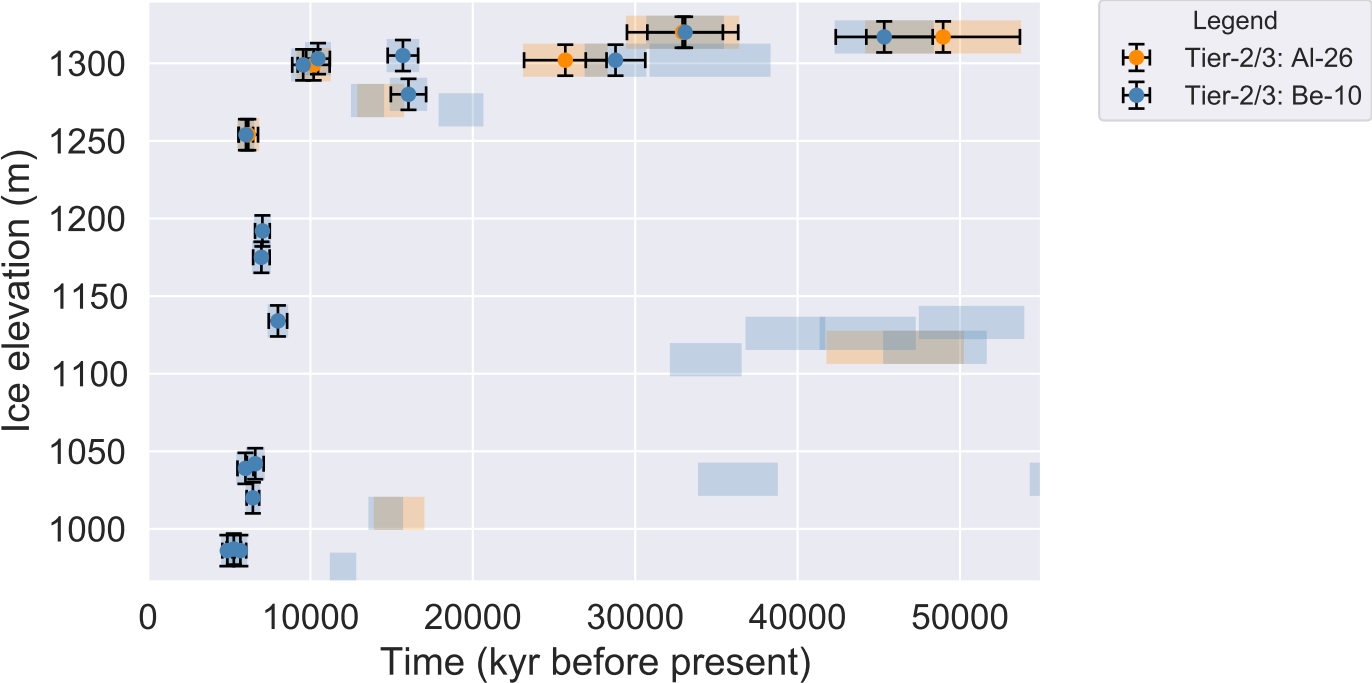

Exposure ages at site: 1705 (Bentley et al., 2010; Nichols et al., 2019)

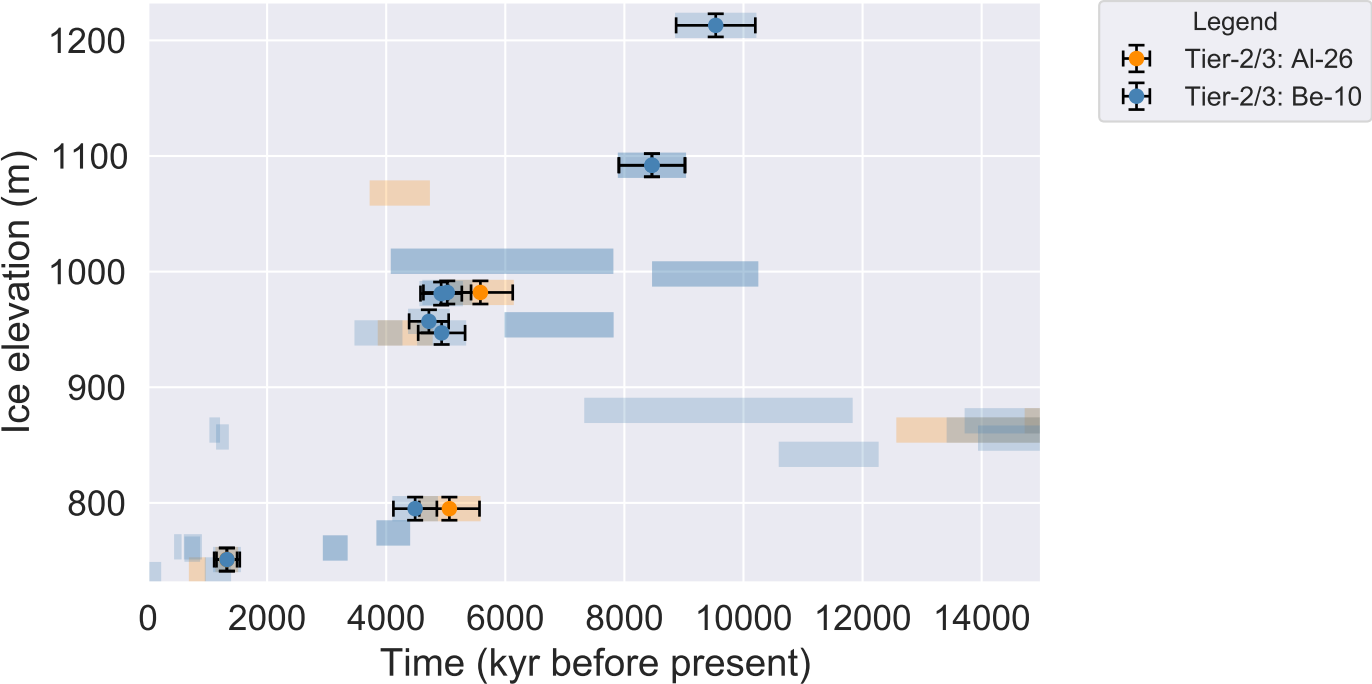

Exposure ages at site: 1706 (Spector et al., 2019; Nichols et al., 2019)

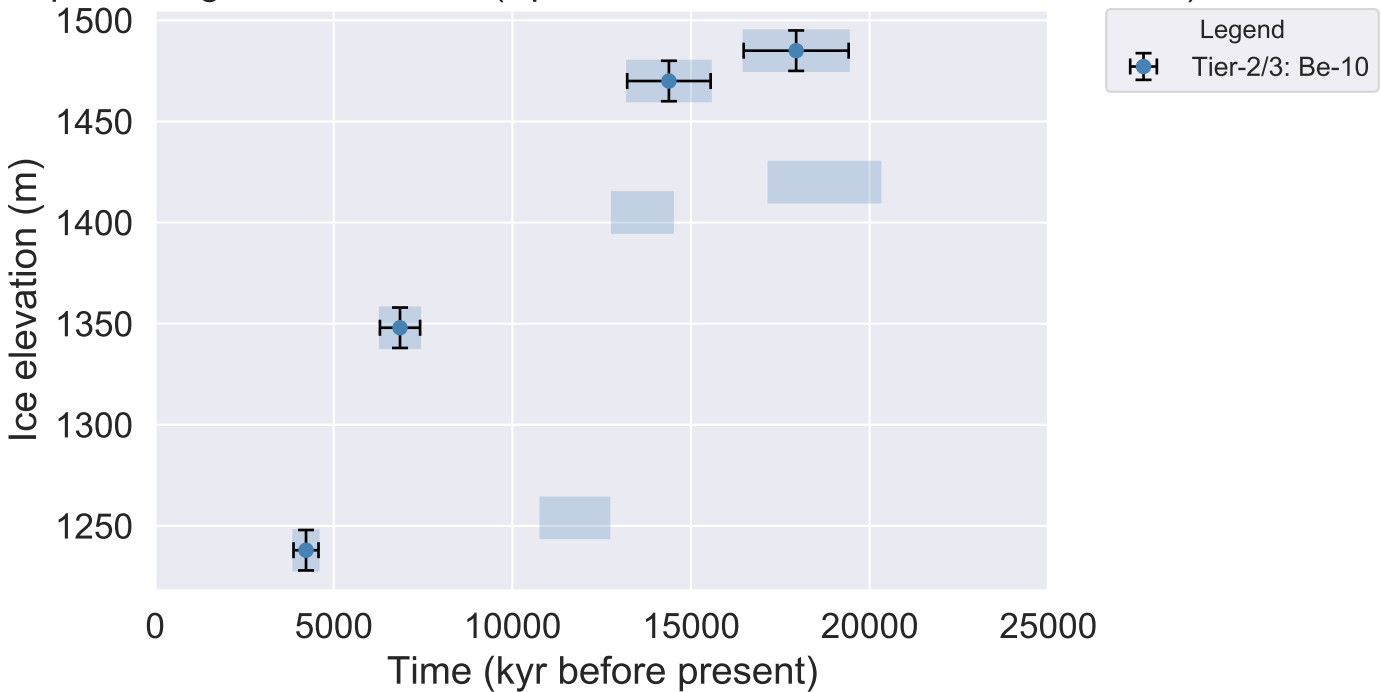

Exposure ages at site: 1707 (Balco et al., 2016; Bentley et al., 2017; Nichols et al., 2019)

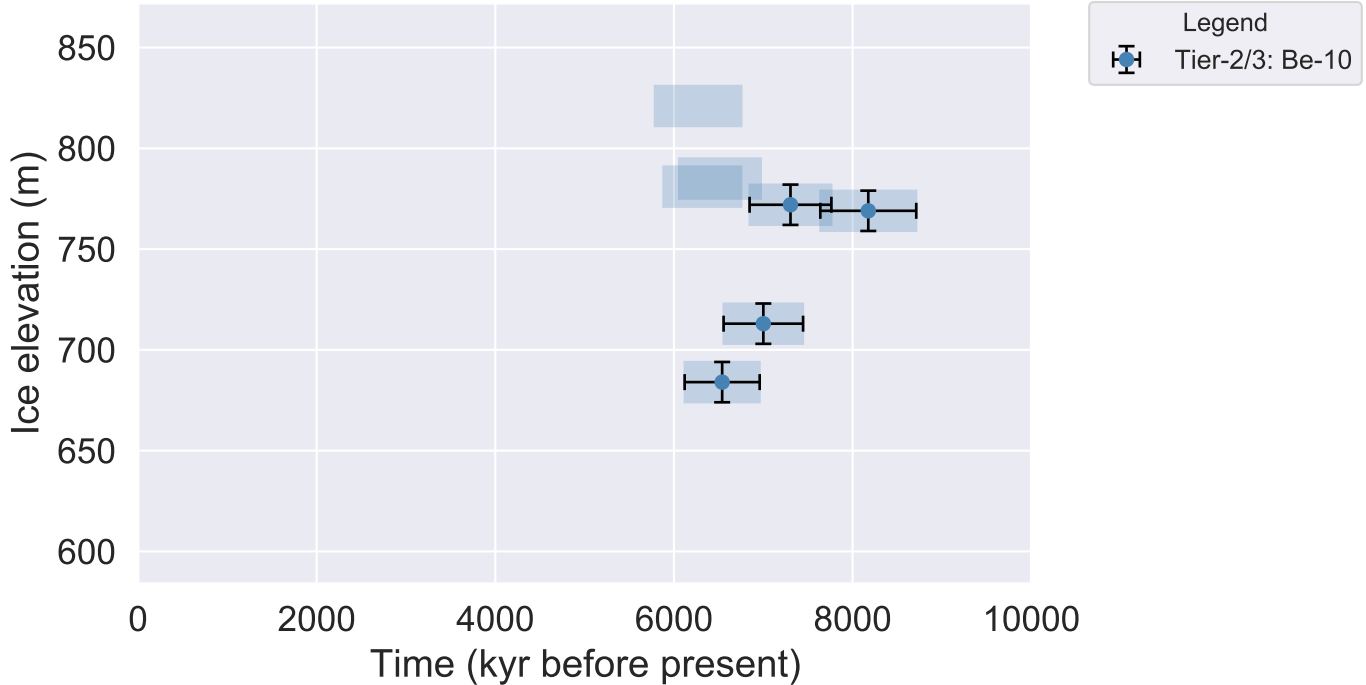

Exposure ages at site: 1708 (Balco et al., 2016; Bentley et al., 2017; Nichols et al., 2019)

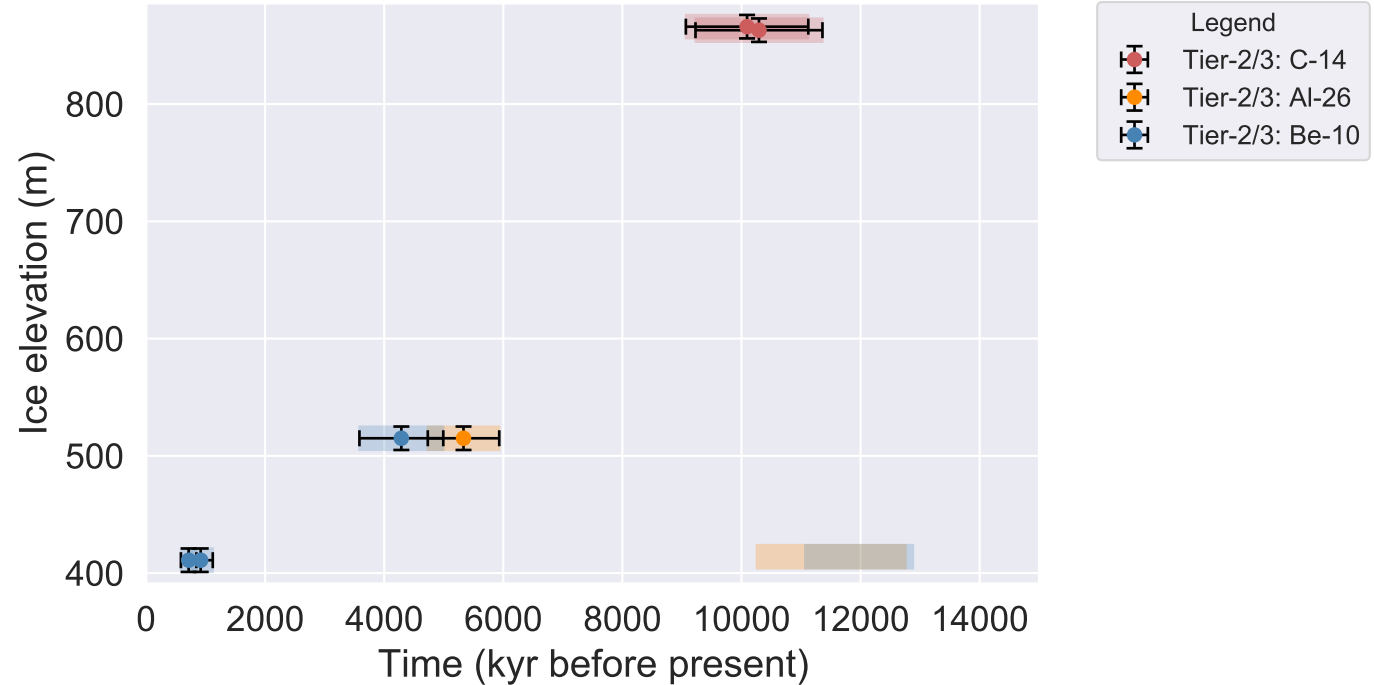

Exposure ages at site: 1709 (Bentley et al., 2017)

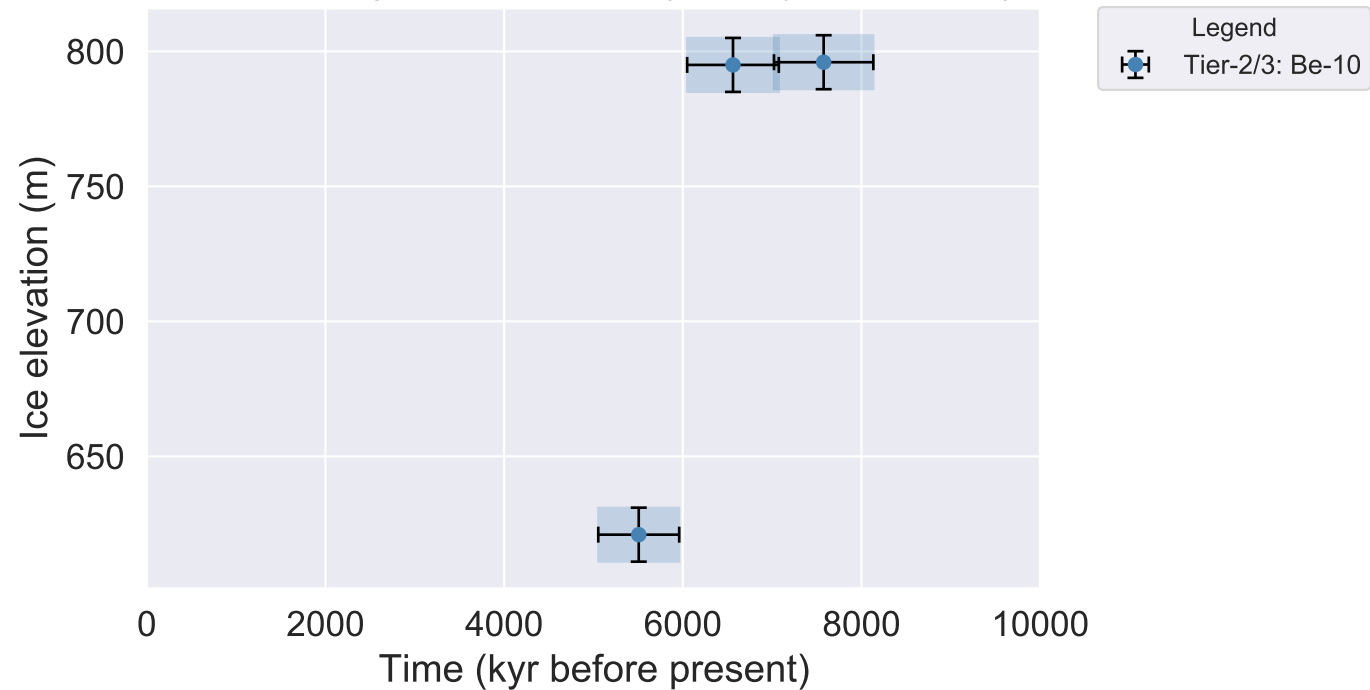

# Exposure ages at site: 1710 (Bentley et al., 2017)

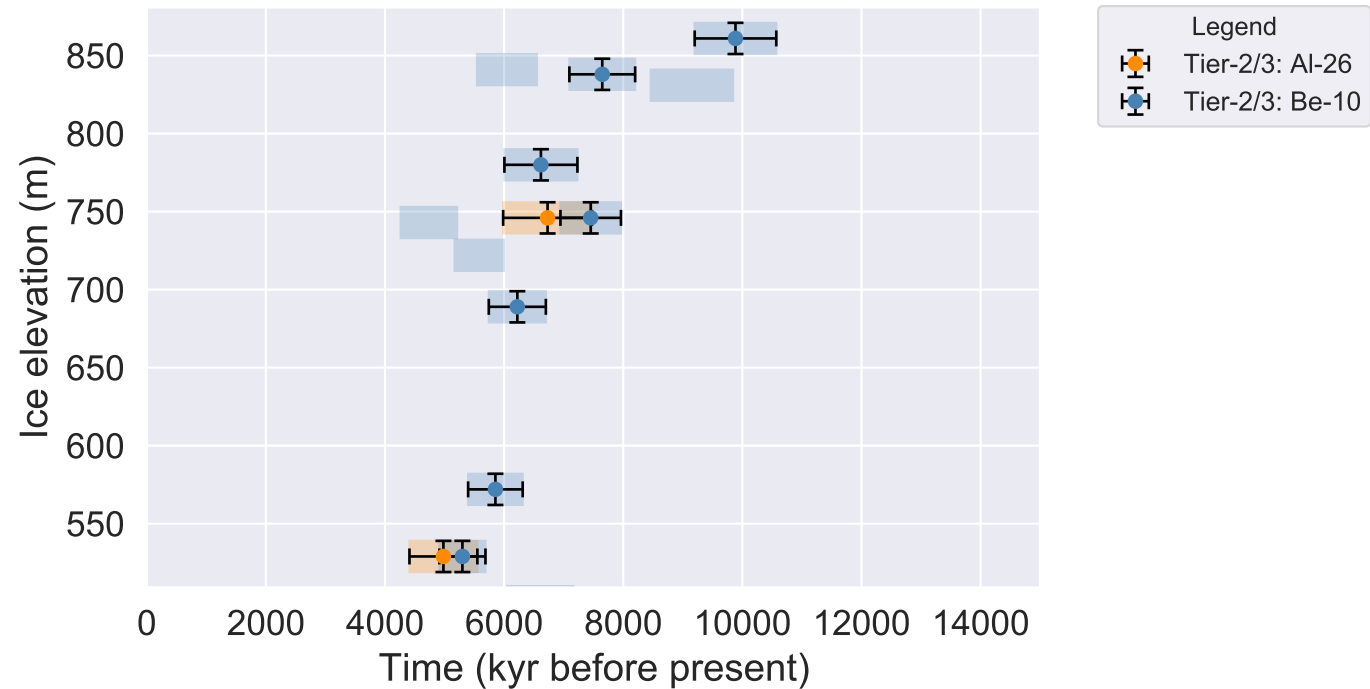

Exposure ages at site: 1711 (Balco et al., 2016; Nichols et al., 2019)

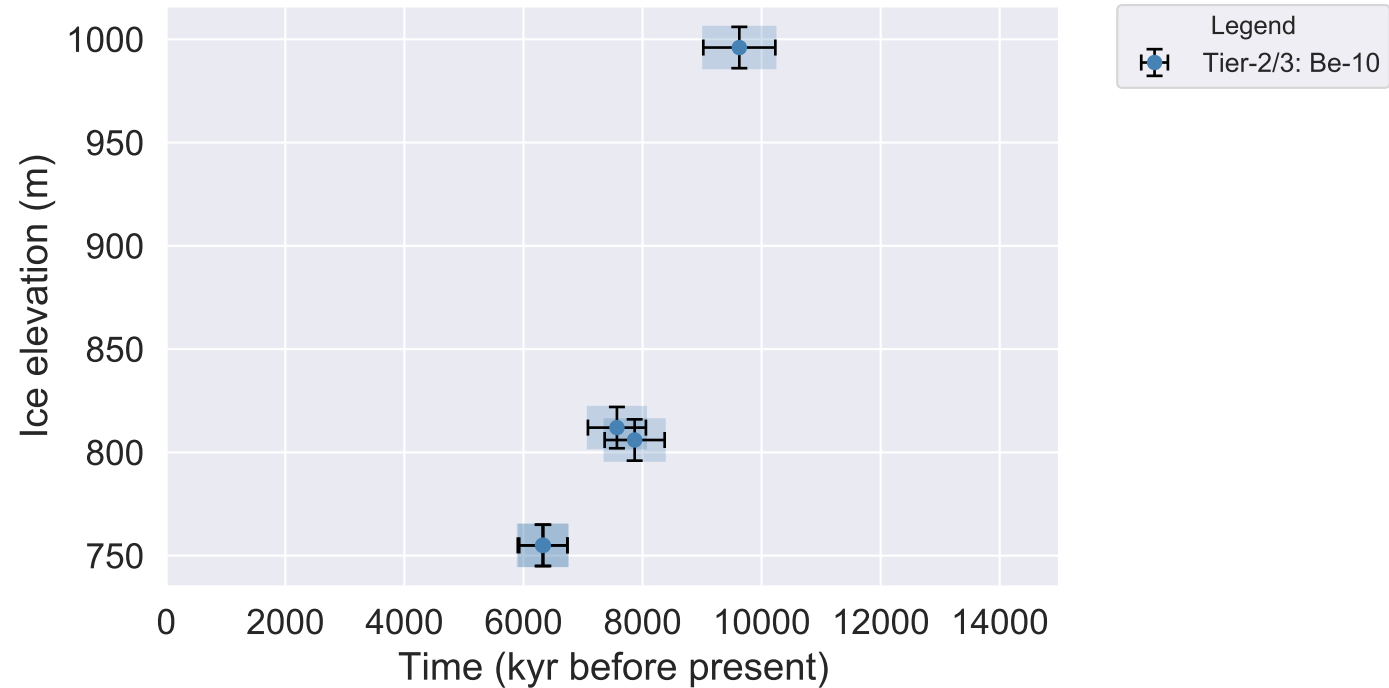

Exposure ages at site: 1712 (Balco et al., 2016; Nichols et al., 2019)

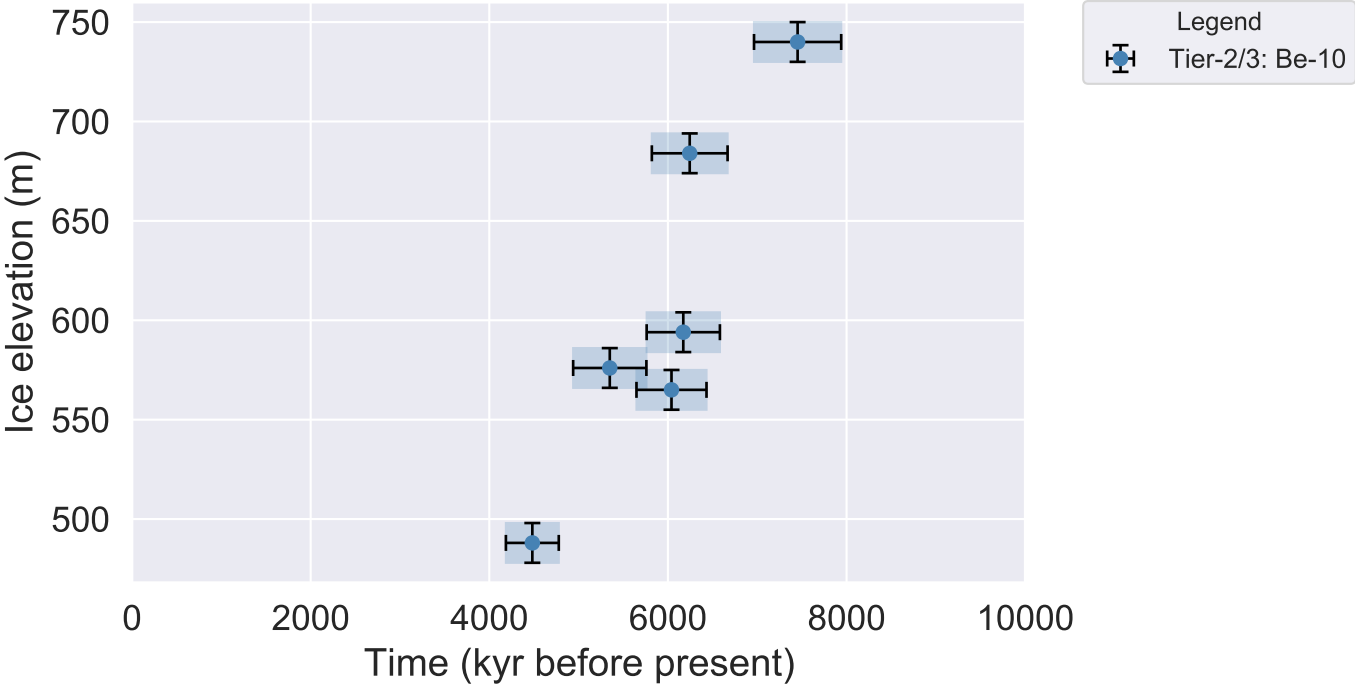

Exposure ages at site: 1713 (Balco et al., 2016; Nichols et al., 2019)

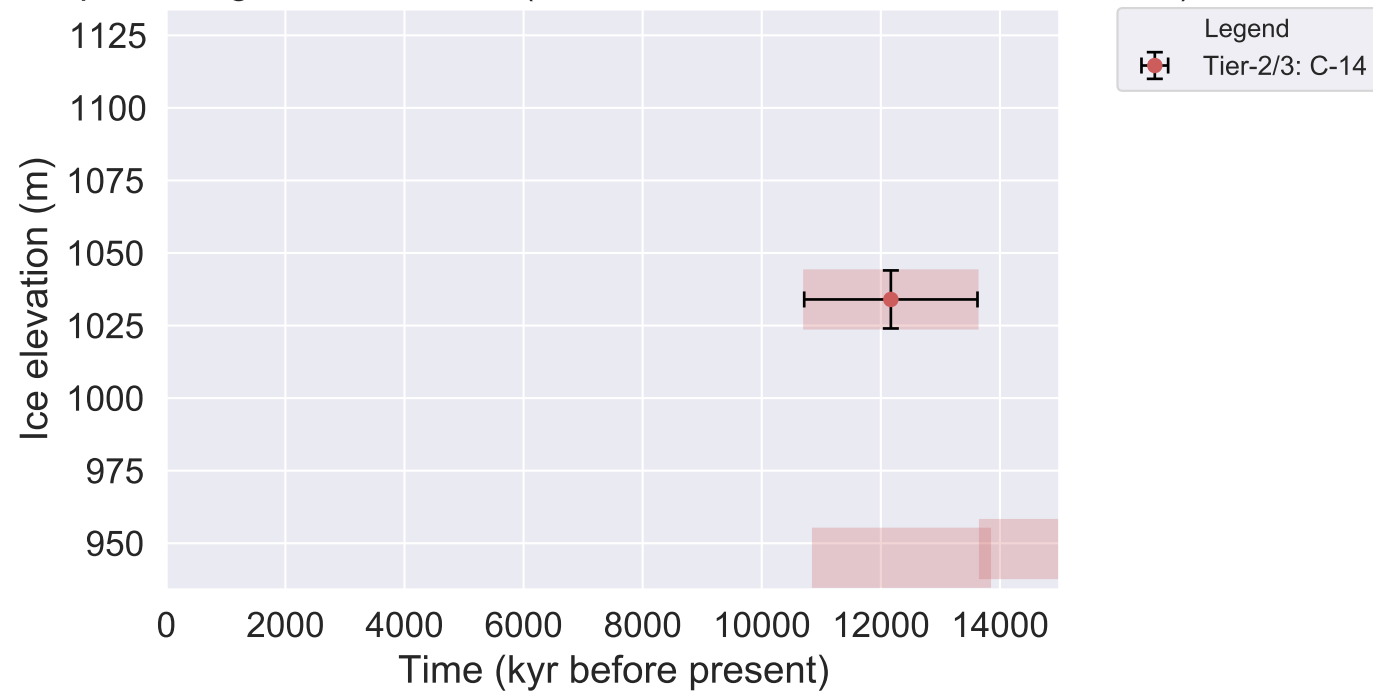

Exposure ages at site: 1714 (Bentley et al., 2017)

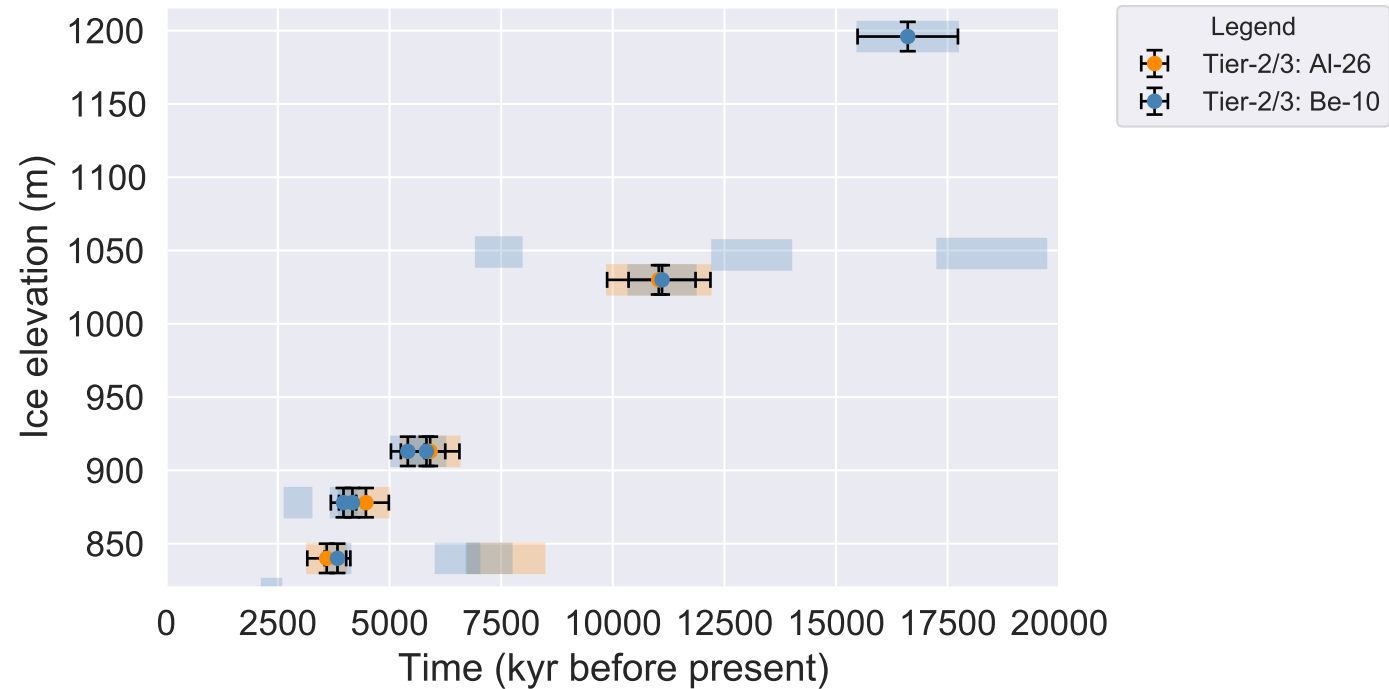

Exposure ages at site: 1715 (Nichols et al., 2019; Hein et al., 2011)

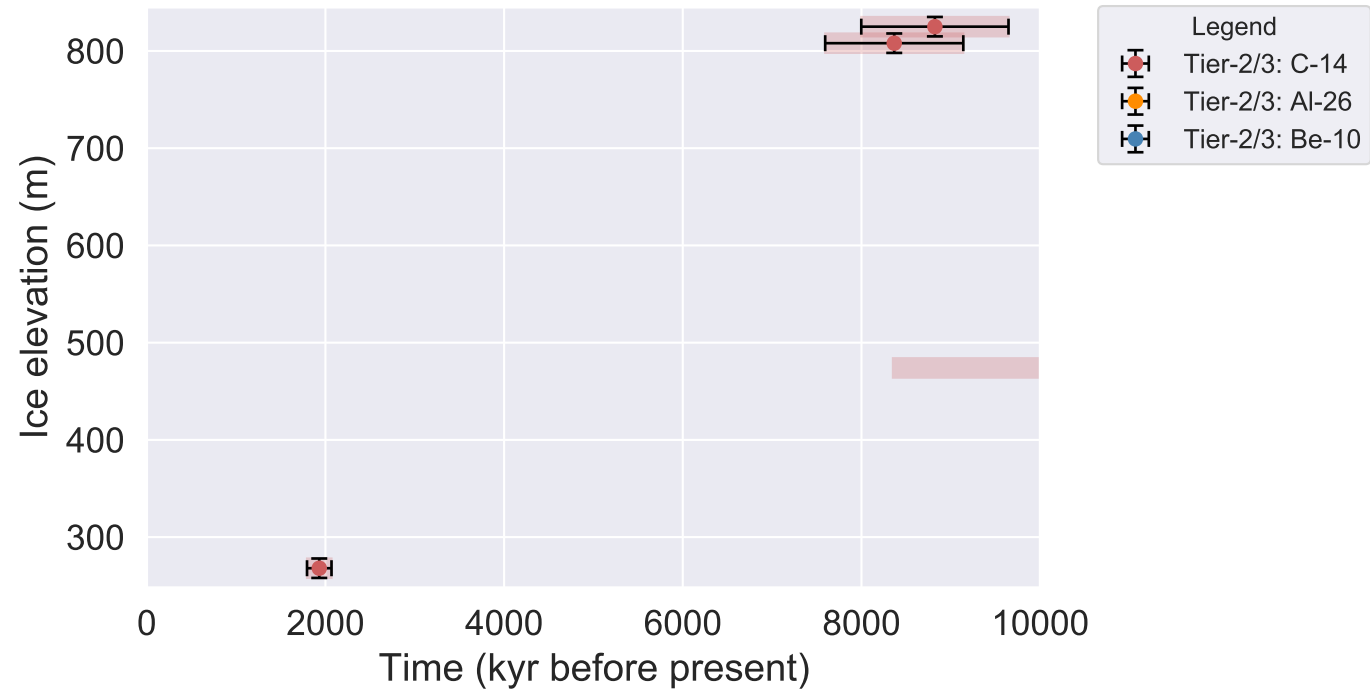

Supplement: Supplementary file 7 [file essd-15-3573-2023-supplement.zip]
