# Supplementary material for: Antarctic Ice Sheet paleo-constraint database
Source: Copernicus journal article supplement (doi:10.5194/essd-15-3573-2023), 2023-08-10
Supplement: Supplementary file 2 [file essd-15-3573-2023-supplement.zip]

Lecavalier et al. Supplementary Content and Figure captions.

Table S1: Lecavalier22.AntICE2.PaleoH.xlsx

Table S2: Lecavalier22.AntICE2.PaleoExt.xlsx

Table S3: Lecavalier22.AntICE2.PaleoRSL.xlsx

Table S4: Lecavalier22.AntICE2.boreTemp.xlsx

Table S5: Lecavalier22.AntICE2.rdotGPS.xlsx

Figure S1-S102: Past ice thickness (paleoH) entire tier-2/3 dataset (see FigS1S102.pdf).

Figure S103: Past ice extent (paleoExt) summary tier-1/2 dataset (see FigS103.pdf).

Figure S104-S180: Past ice extent (paleoExt) entire tier-1/2 dataset (see FigS104S180.pdf).

Figure S181-S192: Past sea level (paleoRSL) entire tier-1/2 dataset (see FigS181S192.pdf).

Figure S193: Present-day GPS uplift rate (rdotGPS) of the tier-1 (orange circle) and tier-2 (blue circles) data (see FigS193.pdf).
