# Supplementary material for: Antarctic Ice Sheet paleo-constraint database
Source: Copernicus journal article supplement (doi:10.5194/essd-15-3573-2023), 2023-08-10
Supplement: Supplementary file 4 [file essd-15-3573-2023-supplement.zip]

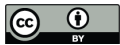

## *Supplement of* **Antarctic Ice Sheet paleo-constraint database**

**Benoit S. Lecavalier et al.**

*Correspondence to:* Benoit S. Lecavalier (b.lecavalier@mun.ca)

- [essd-15-3573-2023-supplement-title-page.pdf](#)
- [Lecavalier.AntICE2.SOM.v1](#)
  - [FigS103.pdf](#)
  - [FigS104S180.pdf](#)
  - [FigS181S192.pdf](#)
  - [FigS193.pdf](#)
  - [FigS1S102.pdf](#)
  - [Lecavalier.AntICE2.SOMCaptions.v1.pdf](#)
  - [Lecavalier22.AntICE2.BoreholeTemp.xlsx](#)
  - [Lecavalier22.AntICE2.PaleoExt.xlsx](#)
  - [Lecavalier22.AntICE2.PaleoH.xlsx](#)
  - [Lecavalier22.AntICE2.rdotGPS.xlsx](#)
  - [Lecavalier22.AntICEv2.PaleoRSL.xlsx](#)

The copyright of individual parts of the supplement might differ from the article licence.
