# Supplementary figures and images for: Antarctic Ice Sheet paleo-constraint database
Source: Copernicus journal article supplement (doi:10.5194/essd-15-3573-2023), 2023-08-10

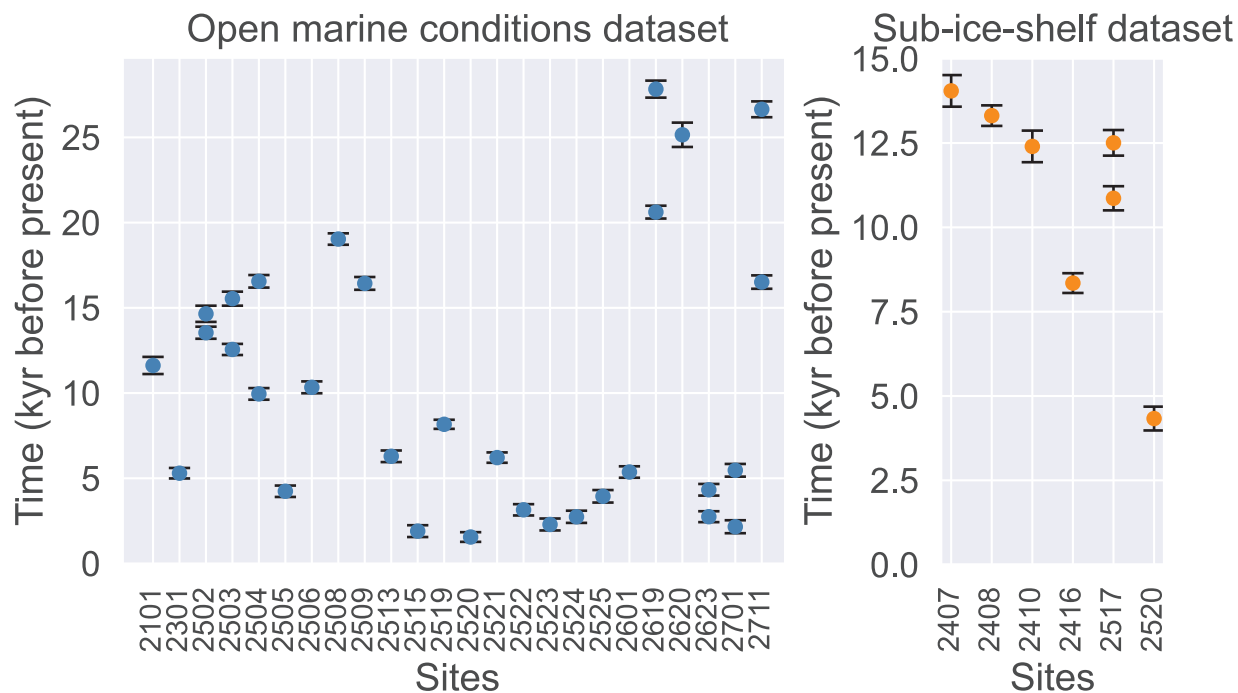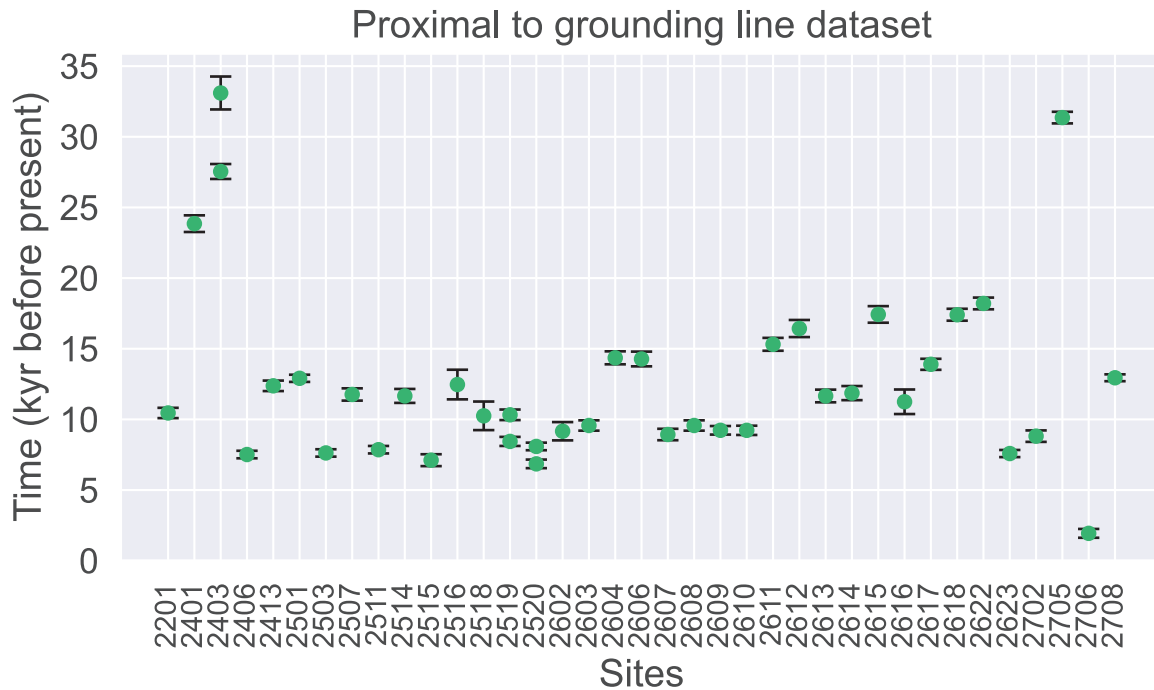

Supplement: Supplementary file 1 [file essd-15-3573-2023-supplement.zip]

Present-day GPS observations

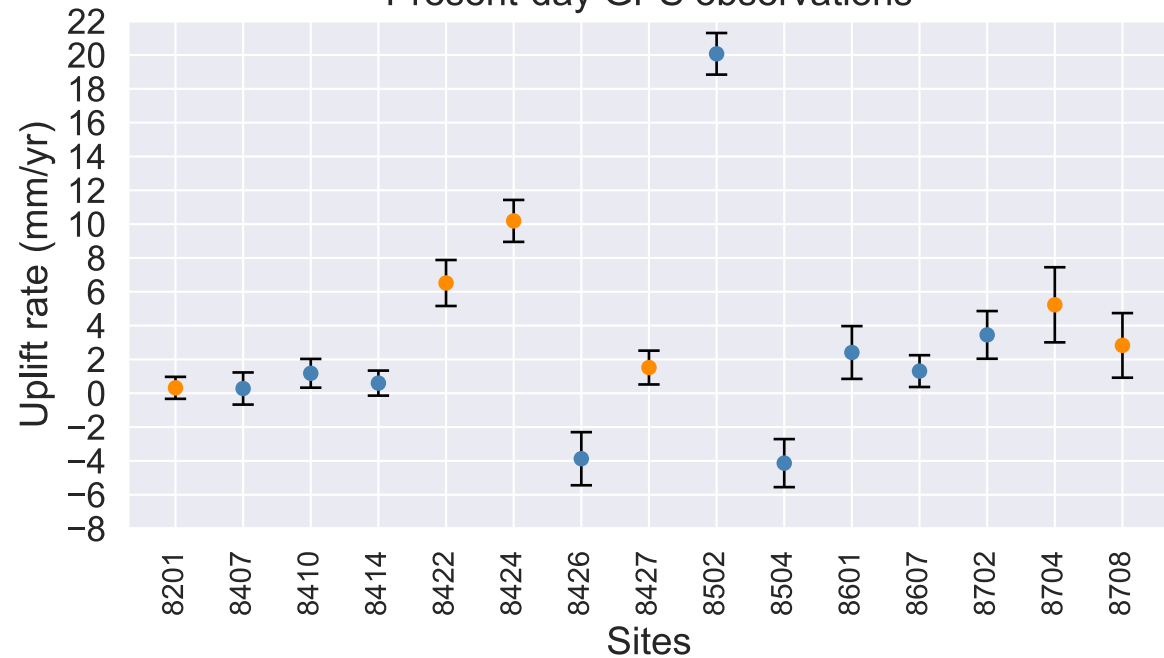

Supplement: Supplementary file 5 [file essd-15-3573-2023-supplement.zip]
